# Supplementary material for: Open circuit voltage of an all-vanadium redox flow battery as a function of the state of charge obtained from UV-Vis spectroscopy
Source: Royal Society of Chemistry journal article supplement (doi:10.1039/d4ya00360h), 2024-01-01
Supplement: d4ya00360h1.xlsx [file d4ya00360h1.xlsx]

## Sheet: Figure 3
λ / nm	A_V(II)	A_V(III)	A_V(IV)	A_V(V)
400.082	0.02218	0.34463	0.0022	0.65573
400.298	0.02186	0.34485	0.00234	0.6581
400.513	0.02155	0.34509	0.00248	0.66048
400.729	0.02125	0.34535	0.00262	0.66287
400.945	0.02095	0.34561	0.00275	0.66528
401.161	0.02066	0.34588	0.00286	0.66771
401.377	0.02038	0.34614	0.00297	0.67016
401.593	0.0201	0.34641	0.00307	0.67262
401.809	0.01983	0.34668	0.00317	0.67511
402.024	0.01957	0.34695	0.00326	0.67761
402.24	0.01931	0.34721	0.00335	0.68012
402.456	0.01906	0.34747	0.00343	0.68266
402.672	0.01881	0.34773	0.0035	0.68521
402.888	0.01857	0.34798	0.00355	0.68777
403.103	0.01834	0.34821	0.0036	0.69034
403.319	0.0181	0.34844	0.00364	0.69291
403.535	0.01787	0.34864	0.00367	0.69546
403.75	0.01763	0.34882	0.00368	0.698
403.966	0.01739	0.34899	0.00368	0.70051
404.182	0.01715	0.34913	0.00365	0.70299
404.397	0.01691	0.34925	0.0036	0.70544
404.613	0.01667	0.34935	0.00353	0.70786
404.828	0.01643	0.34943	0.00343	0.71024
405.044	0.01618	0.34949	0.00332	0.71258
405.26	0.01594	0.34952	0.00318	0.71488
405.475	0.01569	0.34953	0.00303	0.71714
405.691	0.01544	0.34952	0.00286	0.71936
405.906	0.0152	0.34949	0.00267	0.72153
406.122	0.01496	0.34944	0.00246	0.72365
406.337	0.01472	0.34938	0.00224	0.72572
406.553	0.01449	0.3493	0.002	0.72772
406.768	0.01427	0.34921	0.00174	0.72967
406.983	0.01405	0.34911	0.00147	0.73155
407.199	0.01384	0.34899	0.00118	0.73336
407.414	0.01363	0.34887	0.000877764	0.73508
407.63	0.01344	0.34874	0.000563965	0.73673
407.845	0.01325	0.34859	0.00024109	0.73831
408.06	0.01307	0.34844	-9.17021e-05	0.73981
408.276	0.0129	0.34828	-0.000432159	0.74124
408.491	0.01273	0.3481	-0.000775634	0.74259
408.706	0.01257	0.34792	-0.00112	0.74387
408.922	0.01241	0.34773	-0.00146	0.74508
409.137	0.01226	0.34753	-0.00181	0.74621
409.352	0.01212	0.34732	-0.00215	0.74727
409.567	0.01198	0.3471	-0.00248	0.74828
409.782	0.01184	0.34687	-0.00281	0.74923
409.998	0.01171	0.34662	-0.00313	0.75012
410.213	0.01158	0.34637	-0.00344	0.75095
410.428	0.01145	0.3461	-0.00374	0.75173
410.643	0.01132	0.34583	-0.00404	0.75245
410.858	0.0112	0.34554	-0.00432	0.7531
411.073	0.01108	0.34524	-0.00459	0.75368
411.288	0.01097	0.34494	-0.00486	0.7542
411.503	0.01086	0.34462	-0.0051	0.75465
411.719	0.01075	0.3443	-0.00534	0.75504
411.934	0.01064	0.34396	-0.00556	0.75536
412.149	0.01053	0.34362	-0.00577	0.75563
412.364	0.01042	0.34327	-0.00597	0.75583
412.579	0.01031	0.3429	-0.00616	0.75597
412.794	0.01019	0.34252	-0.00634	0.75606
413.008	0.01007	0.34212	-0.0065	0.75609
413.223	0.00993	0.3417	-0.00665	0.75608
413.438	0.0098	0.34127	-0.00679	0.75604
413.653	0.00965	0.34082	-0.00692	0.75596
413.868	0.00949	0.34035	-0.00703	0.75585
414.083	0.00933	0.33986	-0.00712	0.75568
414.298	0.00915	0.33934	-0.0072	0.75548
414.513	0.00897	0.3388	-0.00727	0.75523
414.727	0.00878	0.33824	-0.00732	0.75493
414.942	0.00858	0.33767	-0.00737	0.75456
415.157	0.00838	0.33706	-0.0074	0.75416
415.372	0.00816	0.33644	-0.00743	0.75374
415.587	0.00795	0.3358	-0.00744	0.7533
415.801	0.00772	0.33514	-0.00746	0.75285
416.016	0.00749	0.33446	-0.00746	0.7524
416.231	0.00725	0.33377	-0.00745	0.75193
416.445	0.00701	0.33306	-0.00744	0.75146
416.66	0.00677	0.33234	-0.00743	0.75098
416.875	0.00652	0.3316	-0.00741	0.75048
417.089	0.00628	0.33085	-0.00738	0.74997
417.304	0.00604	0.33009	-0.00735	0.74943
417.519	0.0058	0.32933	-0.00731	0.74888
417.733	0.00556	0.32856	-0.00728	0.74831
417.948	0.00533	0.32778	-0.00723	0.74773
418.162	0.00511	0.327	-0.00718	0.74713
418.377	0.00489	0.32622	-0.00712	0.74651
418.591	0.00467	0.32543	-0.00706	0.74588
418.806	0.00446	0.32464	-0.00699	0.74521
419.02	0.00426	0.32384	-0.00692	0.74452
419.235	0.00407	0.32303	-0.00685	0.74381
419.449	0.00388	0.32221	-0.00677	0.74308
419.664	0.00369	0.32137	-0.00669	0.74232
419.878	0.00351	0.32053	-0.00661	0.74155
420.092	0.00332	0.31968	-0.00652	0.74076
420.307	0.00315	0.31881	-0.00644	0.73996
420.521	0.00298	0.31794	-0.00635	0.73914
420.736	0.00281	0.31706	-0.00626	0.7383
420.95	0.00264	0.31617	-0.00616	0.73743
421.164	0.00248	0.31526	-0.00606	0.73653
421.379	0.00232	0.31433	-0.00596	0.73562
421.593	0.00217	0.3134	-0.00586	0.73467
421.807	0.00202	0.31245	-0.00575	0.73371
422.021	0.00188	0.31148	-0.00565	0.73273
422.236	0.00174	0.31051	-0.00555	0.73171
422.45	0.0016	0.30952	-0.00544	0.73066
422.664	0.00147	0.30852	-0.00534	0.72957
422.878	0.00135	0.30751	-0.00524	0.72844
423.092	0.00123	0.30648	-0.00515	0.72728
423.306	0.00111	0.30545	-0.00506	0.72608
423.521	0.000996878	0.3044	-0.00497	0.72484
423.735	0.000892323	0.30334	-0.0049	0.72355
423.949	0.000794248	0.30228	-0.00484	0.72223
424.163	0.000701263	0.30121	-0.00478	0.72086
424.377	0.000612963	0.30013	-0.00474	0.71945
424.591	0.000529818	0.29904	-0.00471	0.71798
424.805	0.000452271	0.29795	-0.00469	0.71645
425.019	0.000381364	0.29685	-0.00469	0.71487
425.233	0.000317218	0.29574	-0.00471	0.71324
425.447	0.000258594	0.29463	-0.00474	0.71155
425.661	0.000205179	0.29352	-0.00478	0.70981
425.875	0.000156567	0.2924	-0.00483	0.70801
426.089	0.000112859	0.29128	-0.0049	0.70615
426.303	7.34372e-05	0.29015	-0.00498	0.70421
426.517	3.70372e-05	0.28902	-0.00508	0.70222
426.73	2.78159e-06	0.28788	-0.0052	0.70016
426.944	-3.1125e-05	0.28674	-0.00534	0.69804
427.158	-6.64323e-05	0.28558	-0.00549	0.69585
427.372	-0.000104527	0.28441	-0.00566	0.69361
427.586	-0.000146612	0.28324	-0.00584	0.69131
427.8	-0.00019328	0.28205	-0.00604	0.68897
428.013	-0.000244048	0.28085	-0.00625	0.68657
428.227	-0.000297633	0.27964	-0.00648	0.68412
428.441	-0.00035268	0.27843	-0.00673	0.68162
428.655	-0.000409227	0.27721	-0.00699	0.67907
428.868	-0.000467264	0.27598	-0.00727	0.67647
429.082	-0.000525831	0.27475	-0.00756	0.67384
429.296	-0.000584267	0.27351	-0.00786	0.67117
429.509	-0.000641219	0.27227	-0.00818	0.66845
429.723	-0.000695143	0.27102	-0.0085	0.66568
429.937	-0.000745013	0.26977	-0.00884	0.66289
430.15	-0.000791253	0.26852	-0.00919	0.66005
430.364	-0.000834997	0.26726	-0.00955	0.65718
430.577	-0.000876766	0.266	-0.00991	0.65427
430.791	-0.000917001	0.26473	-0.01027	0.65133
431.004	-0.000955783	0.26346	-0.01064	0.64836
431.218	-0.000992076	0.26218	-0.01101	0.64536
431.431	-0.00103	0.2609	-0.01138	0.64235
431.645	-0.00106	0.25961	-0.01175	0.63931
431.858	-0.00109	0.25831	-0.01213	0.63627
432.072	-0.00112	0.25701	-0.0125	0.63321
432.285	-0.00114	0.25571	-0.01286	0.63015
432.499	-0.00117	0.25439	-0.01323	0.62709
432.712	-0.00119	0.25308	-0.01359	0.62403
432.926	-0.00122	0.25175	-0.01396	0.62096
433.139	-0.00124	0.25042	-0.01432	0.6179
433.352	-0.00126	0.24908	-0.01467	0.61483
433.566	-0.00128	0.24773	-0.01502	0.61177
433.779	-0.0013	0.24638	-0.01537	0.60873
433.992	-0.00132	0.24502	-0.0157	0.6057
434.206	-0.00134	0.24366	-0.01603	0.60269
434.419	-0.00135	0.2423	-0.01634	0.59971
434.632	-0.00136	0.24093	-0.01664	0.59675
434.845	-0.00137	0.23955	-0.01693	0.59381
435.059	-0.00137	0.23818	-0.01721	0.59089
435.272	-0.00136	0.2368	-0.01748	0.588
435.485	-0.00135	0.23542	-0.01774	0.58513
435.698	-0.00134	0.23404	-0.01799	0.5823
435.911	-0.00132	0.23265	-0.01823	0.5795
436.124	-0.0013	0.23126	-0.01846	0.57674
436.338	-0.00128	0.22986	-0.01866	0.57403
436.551	-0.00125	0.22846	-0.01885	0.57135
436.764	-0.00122	0.22706	-0.01903	0.5687
436.977	-0.00118	0.22566	-0.01919	0.56607
437.19	-0.00114	0.22426	-0.01934	0.56344
437.403	-0.00109	0.22286	-0.01948	0.56083
437.616	-0.00104	0.22147	-0.0196	0.55823
437.829	-0.00098089	0.22007	-0.01971	0.55565
438.042	-0.00091767	0.21868	-0.01981	0.55307
438.255	-0.000849128	0.21729	-0.0199	0.55051
438.468	-0.000776035	0.21591	-0.01998	0.54796
438.681	-0.000699913	0.21452	-0.02004	0.54541
438.894	-0.000623204	0.21314	-0.0201	0.54288
439.107	-0.000546826	0.21176	-0.02014	0.54036
439.319	-0.000471071	0.21037	-0.02017	0.53785
439.532	-0.000396698	0.20898	-0.0202	0.53536
439.745	-0.00032372	0.2076	-0.02022	0.53288
439.958	-0.000252501	0.20621	-0.02023	0.53042
440.171	-0.000183832	0.20482	-0.02023	0.52796
440.384	-0.000117521	0.20344	-0.02022	0.52553
440.596	-5.34319e-05	0.20205	-0.02021	0.5231
440.809	7.85217e-06	0.20066	-0.02019	0.52068
441.022	6.64593e-05	0.19928	-0.02017	0.51827
441.235	0.000122859	0.19789	-0.02015	0.51586
441.447	0.000177307	0.19651	-0.02012	0.51346
441.66	0.000229692	0.19512	-0.02009	0.51107
441.873	0.000280081	0.19374	-0.02007	0.50868
442.085	0.000329409	0.19236	-0.02004	0.5063
442.298	0.000377948	0.19098	-0.02	0.50393
442.511	0.000425767	0.1896	-0.01997	0.50156
442.723	0.000473712	0.18823	-0.01993	0.49919
442.936	0.000522592	0.18687	-0.0199	0.49681
443.148	0.000572438	0.1855	-0.01986	0.49443
443.361	0.000622579	0.18415	-0.01983	0.49205
443.574	0.00067313	0.1828	-0.01979	0.48967
443.786	0.00072478	0.18146	-0.01976	0.48729
443.999	0.000777581	0.18012	-0.01972	0.48492
444.211	0.000830893	0.17879	-0.01969	0.48254
444.424	0.000884113	0.17746	-0.01966	0.48017
444.636	0.000936606	0.17614	-0.01963	0.4778
444.849	0.00098798	0.17482	-0.01959	0.47543
445.061	0.00104	0.1735	-0.01956	0.47305
445.273	0.00109	0.17219	-0.01952	0.47068
445.486	0.00114	0.17088	-0.01949	0.46831
445.698	0.00119	0.16958	-0.01945	0.46594
445.91	0.00124	0.16828	-0.01941	0.46356
446.123	0.00128	0.16698	-0.01937	0.46119
446.335	0.00133	0.16569	-0.01933	0.45883
446.547	0.00137	0.1644	-0.01929	0.45646
446.76	0.00141	0.16311	-0.01926	0.45411
446.972	0.00146	0.16183	-0.01922	0.45175
447.184	0.0015	0.16055	-0.01919	0.4494
447.397	0.00154	0.15927	-0.01916	0.44706
447.609	0.00159	0.158	-0.01912	0.44471
447.821	0.00163	0.15673	-0.01909	0.44237
448.033	0.00167	0.15546	-0.01906	0.44004
448.245	0.00172	0.1542	-0.01903	0.4377
448.458	0.00176	0.15294	-0.019	0.43537
448.67	0.00181	0.15168	-0.01897	0.43304
448.882	0.00185	0.15043	-0.01894	0.4307
449.094	0.00189	0.14918	-0.01891	0.42836
449.306	0.00194	0.14793	-0.01887	0.42602
449.518	0.00198	0.14668	-0.01883	0.42368
449.73	0.00203	0.14543	-0.01879	0.42134
449.942	0.00207	0.14419	-0.01875	0.41901
450.154	0.00212	0.14295	-0.01872	0.41668
450.366	0.00216	0.14171	-0.01868	0.41436
450.578	0.0022	0.14047	-0.01864	0.41203
450.79	0.00225	0.13924	-0.0186	0.40972
451.002	0.00229	0.13801	-0.01856	0.40741
451.214	0.00233	0.13677	-0.01852	0.4051
451.426	0.00237	0.13555	-0.01849	0.4028
451.638	0.00242	0.13432	-0.01845	0.40049
451.85	0.00246	0.1331	-0.01842	0.39819
452.062	0.0025	0.13189	-0.01839	0.3959
452.274	0.00254	0.13067	-0.01837	0.3936
452.485	0.00259	0.12947	-0.01835	0.39131
452.697	0.00263	0.12826	-0.01833	0.38902
452.909	0.00268	0.12707	-0.01831	0.38673
453.121	0.00272	0.12587	-0.0183	0.38445
453.333	0.00277	0.12468	-0.01828	0.38217
453.544	0.00281	0.1235	-0.01827	0.37989
453.756	0.00286	0.12232	-0.01826	0.37762
453.968	0.00291	0.12115	-0.01825	0.37536
454.18	0.00296	0.11999	-0.01823	0.3731
454.391	0.00301	0.11883	-0.01822	0.37084
454.603	0.00306	0.11768	-0.01821	0.36859
454.815	0.00311	0.11655	-0.01819	0.36634
455.026	0.00317	0.11542	-0.01818	0.36409
455.238	0.00323	0.11429	-0.01817	0.36184
455.449	0.00329	0.11318	-0.01816	0.35959
455.661	0.00335	0.11208	-0.01815	0.35735
455.873	0.00341	0.11098	-0.01815	0.3551
456.084	0.00347	0.1099	-0.01814	0.35286
456.296	0.00353	0.10882	-0.01814	0.35062
456.507	0.00359	0.10775	-0.01814	0.34839
456.719	0.00365	0.10669	-0.01814	0.34615
456.93	0.00371	0.10563	-0.01814	0.34392
457.142	0.00377	0.10458	-0.01814	0.34169
457.353	0.00383	0.10354	-0.01815	0.33946
457.565	0.00389	0.10251	-0.01815	0.33723
457.776	0.00395	0.10149	-0.01816	0.33501
457.987	0.00402	0.10047	-0.01817	0.3328
458.199	0.00408	0.09946	-0.01818	0.33059
458.41	0.00414	0.09846	-0.01819	0.32839
458.621	0.0042	0.09747	-0.0182	0.3262
458.833	0.00426	0.09648	-0.01822	0.32401
459.044	0.00432	0.0955	-0.01823	0.32183
459.255	0.00438	0.09453	-0.01825	0.31966
459.467	0.00443	0.09356	-0.01826	0.3175
459.678	0.00449	0.0926	-0.01828	0.31535
459.889	0.00455	0.09165	-0.01829	0.3132
460.101	0.0046	0.09071	-0.01831	0.31106
460.312	0.00466	0.08977	-0.01832	0.30894
460.523	0.00471	0.08883	-0.01834	0.30682
460.734	0.00477	0.08791	-0.01835	0.3047
460.945	0.00482	0.08699	-0.01836	0.3026
461.156	0.00487	0.08608	-0.01838	0.3005
461.368	0.00492	0.08518	-0.01839	0.29841
461.579	0.00497	0.08428	-0.0184	0.29634
461.79	0.00502	0.08339	-0.01841	0.29427
462.001	0.00507	0.0825	-0.01842	0.29222
462.212	0.00513	0.08163	-0.01843	0.29018
462.423	0.00518	0.08076	-0.01843	0.28815
462.634	0.00523	0.07989	-0.01843	0.28614
462.845	0.00528	0.07904	-0.01843	0.28414
463.056	0.00533	0.07819	-0.01843	0.28215
463.267	0.00538	0.07735	-0.01843	0.28018
463.478	0.00544	0.07651	-0.01843	0.27822
463.689	0.00549	0.07568	-0.01843	0.27627
463.9	0.00554	0.07486	-0.01842	0.27434
464.111	0.00559	0.07405	-0.01842	0.27242
464.322	0.00564	0.07323	-0.01842	0.27051
464.533	0.00569	0.07243	-0.01842	0.26861
464.743	0.00573	0.07163	-0.01841	0.26673
464.954	0.00578	0.07083	-0.01841	0.26485
465.165	0.00582	0.07004	-0.01841	0.26299
465.376	0.00586	0.06926	-0.01841	0.26114
465.587	0.00591	0.06848	-0.01841	0.25929
465.798	0.00595	0.0677	-0.01841	0.25746
466.008	0.006	0.06694	-0.01841	0.25564
466.219	0.00604	0.06618	-0.01841	0.25382
466.43	0.00609	0.06543	-0.01841	0.25202
466.64	0.00614	0.06468	-0.01842	0.25023
466.851	0.00619	0.06395	-0.01842	0.24845
467.062	0.00624	0.06322	-0.01842	0.24667
467.273	0.00629	0.0625	-0.01841	0.24491
467.483	0.00635	0.06178	-0.01841	0.24316
467.694	0.00641	0.06108	-0.01841	0.24142
467.904	0.00647	0.06038	-0.0184	0.23968
468.115	0.00653	0.05969	-0.01839	0.23796
468.326	0.0066	0.059	-0.01839	0.23624
468.536	0.00667	0.05833	-0.01838	0.23453
468.747	0.00674	0.05766	-0.01837	0.23283
468.957	0.00681	0.057	-0.01836	0.23114
469.168	0.00689	0.05636	-0.01836	0.22946
469.378	0.00698	0.05572	-0.01835	0.22779
469.589	0.00706	0.05509	-0.01834	0.22612
469.799	0.00716	0.05447	-0.01834	0.22446
470.01	0.00726	0.05386	-0.01833	0.22282
470.22	0.00736	0.05327	-0.01833	0.22118
470.43	0.00747	0.05268	-0.01832	0.21955
470.641	0.00758	0.0521	-0.01832	0.21794
470.851	0.0077	0.05154	-0.01831	0.21633
471.062	0.00782	0.05099	-0.0183	0.21473
471.272	0.00795	0.05044	-0.01829	0.21314
471.482	0.00808	0.04991	-0.01828	0.21156
471.693	0.00822	0.04939	-0.01828	0.20998
471.903	0.00837	0.04888	-0.01827	0.20841
472.113	0.00851	0.04838	-0.01826	0.20685
472.323	0.00867	0.04789	-0.01825	0.2053
472.534	0.00883	0.04741	-0.01824	0.20376
472.744	0.00899	0.04695	-0.01822	0.20222
472.954	0.00916	0.04649	-0.01821	0.20068
473.164	0.00933	0.04604	-0.0182	0.19916
473.374	0.0095	0.0456	-0.01819	0.19764
473.585	0.00968	0.04517	-0.01818	0.19612
473.795	0.00986	0.04475	-0.01817	0.19461
474.005	0.01005	0.04434	-0.01816	0.1931
474.215	0.01024	0.04394	-0.01816	0.19159
474.425	0.01043	0.04355	-0.01816	0.19009
474.635	0.01062	0.04317	-0.01816	0.18859
474.845	0.01082	0.04279	-0.01816	0.1871
475.055	0.01102	0.04242	-0.01816	0.1856
475.265	0.01122	0.04206	-0.01817	0.18412
475.475	0.01143	0.04171	-0.01817	0.18264
475.685	0.01164	0.04137	-0.01818	0.18116
475.895	0.01184	0.04103	-0.01819	0.17969
476.105	0.01205	0.0407	-0.01819	0.17823
476.315	0.01226	0.04037	-0.0182	0.17677
476.525	0.01247	0.04005	-0.01821	0.17533
476.735	0.01268	0.03973	-0.01821	0.17388
476.945	0.0129	0.03942	-0.01822	0.17245
477.155	0.01311	0.03912	-0.01822	0.17102
477.365	0.01332	0.03882	-0.01823	0.1696
477.574	0.01354	0.03853	-0.01823	0.16818
477.784	0.01375	0.03824	-0.01823	0.16678
477.994	0.01397	0.03796	-0.01823	0.16538
478.204	0.01419	0.03769	-0.01823	0.16398
478.414	0.01441	0.03742	-0.01823	0.1626
478.623	0.01463	0.03715	-0.01823	0.16122
478.833	0.01485	0.03689	-0.01823	0.15985
479.043	0.01507	0.03664	-0.01823	0.15848
479.253	0.01529	0.03639	-0.01822	0.15712
479.462	0.01551	0.03614	-0.01822	0.15577
479.672	0.01573	0.0359	-0.01821	0.15443
479.882	0.01595	0.03566	-0.0182	0.15309
480.091	0.01617	0.03543	-0.01819	0.15176
480.301	0.01639	0.0352	-0.01818	0.15044
480.51	0.01661	0.03497	-0.01817	0.14913
480.72	0.01683	0.03475	-0.01816	0.14782
480.93	0.01705	0.03453	-0.01815	0.14652
481.139	0.01727	0.03432	-0.01813	0.14523
481.349	0.01749	0.03411	-0.01812	0.14394
481.558	0.01771	0.0339	-0.0181	0.14267
481.768	0.01793	0.0337	-0.01808	0.1414
481.977	0.01815	0.0335	-0.01806	0.14014
482.187	0.01837	0.03331	-0.01804	0.13889
482.396	0.01859	0.03312	-0.01801	0.13765
482.606	0.01882	0.03293	-0.01798	0.13642
482.815	0.01904	0.03275	-0.01796	0.13519
483.024	0.01926	0.03258	-0.01793	0.13397
483.234	0.01948	0.0324	-0.0179	0.13276
483.443	0.01971	0.03223	-0.01786	0.13156
483.653	0.01993	0.03207	-0.01783	0.13037
483.862	0.02015	0.03191	-0.01779	0.12918
484.071	0.02038	0.03175	-0.01775	0.128
484.281	0.0206	0.03159	-0.01771	0.12683
484.49	0.02083	0.03145	-0.01767	0.12567
484.699	0.02106	0.0313	-0.01763	0.12452
484.908	0.02129	0.03116	-0.01758	0.12338
485.118	0.02152	0.03103	-0.01754	0.12224
485.327	0.02175	0.0309	-0.01749	0.12111
485.536	0.02199	0.03077	-0.01744	0.11999
485.745	0.02223	0.03065	-0.01738	0.11888
485.954	0.02246	0.03053	-0.01733	0.11778
486.163	0.0227	0.03042	-0.01727	0.11669
486.373	0.02294	0.03031	-0.01721	0.1156
486.582	0.02319	0.0302	-0.01714	0.11453
486.791	0.02343	0.0301	-0.01708	0.11346
487	0.02367	0.03	-0.01702	0.1124
487.209	0.02391	0.0299	-0.01695	0.11134
487.418	0.02416	0.02981	-0.01688	0.1103
487.627	0.0244	0.02972	-0.01681	0.10926
487.836	0.02465	0.02963	-0.01675	0.10822
488.045	0.02489	0.02955	-0.01668	0.1072
488.254	0.02514	0.02947	-0.01661	0.10618
488.463	0.02539	0.02939	-0.01654	0.10516
488.672	0.02564	0.02932	-0.01647	0.10415
488.881	0.02589	0.02926	-0.0164	0.10315
489.09	0.02614	0.02919	-0.01632	0.10216
489.299	0.0264	0.02913	-0.01625	0.10118
489.508	0.02666	0.02908	-0.01618	0.1002
489.716	0.02692	0.02903	-0.0161	0.09922
489.925	0.02718	0.02898	-0.01603	0.09826
490.134	0.02744	0.02893	-0.01595	0.0973
490.343	0.0277	0.02889	-0.01588	0.09635
490.552	0.02797	0.02886	-0.0158	0.0954
490.761	0.02823	0.02882	-0.01572	0.09446
490.969	0.0285	0.02879	-0.01564	0.09353
491.178	0.02877	0.02877	-0.01556	0.0926
491.387	0.02904	0.02874	-0.01548	0.09168
491.596	0.02931	0.02873	-0.0154	0.09077
491.804	0.02958	0.02871	-0.01532	0.08986
492.013	0.02985	0.0287	-0.01523	0.08896
492.222	0.03013	0.02869	-0.01515	0.08807
492.43	0.0304	0.02868	-0.01506	0.08718
492.639	0.03068	0.02868	-0.01497	0.0863
492.847	0.03096	0.02868	-0.01489	0.08542
493.056	0.03124	0.02868	-0.0148	0.08455
493.265	0.03153	0.02869	-0.01471	0.08369
493.473	0.03181	0.0287	-0.01462	0.08283
493.682	0.0321	0.02872	-0.01452	0.08198
493.89	0.03239	0.02874	-0.01443	0.08114
494.099	0.03268	0.02877	-0.01434	0.0803
494.307	0.03298	0.0288	-0.01424	0.07946
494.516	0.03327	0.02883	-0.01414	0.07864
494.724	0.03358	0.02887	-0.01404	0.07782
494.933	0.03388	0.02891	-0.01394	0.077
495.141	0.03419	0.02896	-0.01384	0.0762
495.349	0.0345	0.02901	-0.01374	0.0754
495.558	0.03481	0.02907	-0.01364	0.0746
495.766	0.03513	0.02914	-0.01353	0.07381
495.975	0.03545	0.02921	-0.01343	0.07302
496.183	0.03577	0.02928	-0.01333	0.07224
496.391	0.0361	0.02936	-0.01322	0.07147
496.6	0.03644	0.02945	-0.01312	0.07069
496.808	0.03677	0.02954	-0.01302	0.06993
497.016	0.03711	0.02964	-0.01291	0.06916
497.224	0.03746	0.02974	-0.01281	0.06841
497.433	0.0378	0.02985	-0.01271	0.06765
497.641	0.03815	0.02996	-0.01261	0.0669
497.849	0.03851	0.03008	-0.01251	0.06615
498.057	0.03886	0.0302	-0.01241	0.06541
498.265	0.03922	0.03032	-0.01231	0.06467
498.474	0.03958	0.03045	-0.01221	0.06393
498.682	0.03994	0.03059	-0.01211	0.0632
498.89	0.04031	0.03072	-0.01201	0.06247
499.098	0.04067	0.03086	-0.01192	0.06174
499.306	0.04104	0.031	-0.01182	0.06102
499.514	0.04141	0.03115	-0.01173	0.06029
499.722	0.04178	0.03129	-0.01164	0.05958
499.93	0.04215	0.03145	-0.01154	0.05886
500.138	0.04252	0.0316	-0.01145	0.05815
500.346	0.0429	0.03176	-0.01136	0.05744
500.554	0.04327	0.03192	-0.01127	0.05674
500.762	0.04365	0.03208	-0.01118	0.05604
500.97	0.04402	0.03225	-0.01109	0.05534
501.178	0.0444	0.03241	-0.011	0.05465
501.386	0.04478	0.03259	-0.01091	0.05396
501.594	0.04516	0.03276	-0.01082	0.05328
501.802	0.04554	0.03293	-0.01073	0.0526
502.01	0.04593	0.03311	-0.01063	0.05193
502.218	0.04631	0.03329	-0.01054	0.05125
502.425	0.04669	0.03348	-0.01045	0.05059
502.633	0.04708	0.03366	-0.01036	0.04992
502.841	0.04746	0.03385	-0.01027	0.04927
503.049	0.04785	0.03404	-0.01018	0.04861
503.257	0.04823	0.03423	-0.01008	0.04796
503.464	0.04862	0.03442	-0.00999	0.04732
503.672	0.04901	0.03462	-0.0099	0.04668
503.88	0.0494	0.03481	-0.0098	0.04604
504.088	0.04978	0.03501	-0.0097	0.04541
504.295	0.05017	0.03521	-0.0096	0.04479
504.503	0.05056	0.03541	-0.00951	0.04417
504.711	0.05095	0.03561	-0.00941	0.04355
504.918	0.05133	0.03582	-0.00931	0.04294
505.126	0.05172	0.03602	-0.00921	0.04234
505.333	0.0521	0.03622	-0.0091	0.04173
505.541	0.05249	0.03643	-0.009	0.04114
505.749	0.05287	0.03663	-0.00889	0.04054
505.956	0.05326	0.03684	-0.00879	0.03996
506.164	0.05364	0.03705	-0.00868	0.03937
506.371	0.05402	0.03726	-0.00857	0.0388
506.579	0.05441	0.03747	-0.00846	0.03822
506.786	0.05479	0.03768	-0.00835	0.03765
506.994	0.05517	0.03789	-0.00823	0.03709
507.201	0.05555	0.0381	-0.00811	0.03653
507.409	0.05593	0.03832	-0.008	0.03598
507.616	0.05632	0.03853	-0.00788	0.03543
507.823	0.0567	0.03875	-0.00776	0.03489
508.031	0.05708	0.03897	-0.00763	0.03435
508.238	0.05746	0.03919	-0.0075	0.03382
508.445	0.05784	0.03941	-0.00738	0.0333
508.653	0.05822	0.03963	-0.00724	0.03278
508.86	0.05859	0.03985	-0.00711	0.03227
509.067	0.05897	0.04007	-0.00697	0.03176
509.275	0.05935	0.0403	-0.00683	0.03126
509.482	0.05972	0.04052	-0.00668	0.03076
509.689	0.0601	0.04075	-0.00654	0.03028
509.896	0.06047	0.04097	-0.00639	0.02979
510.104	0.06085	0.0412	-0.00624	0.02931
510.311	0.06122	0.04143	-0.00608	0.02884
510.518	0.06159	0.04166	-0.00592	0.02838
510.725	0.06196	0.04189	-0.00576	0.02792
510.932	0.06233	0.04213	-0.0056	0.02746
511.14	0.0627	0.04236	-0.00543	0.02701
511.347	0.06307	0.0426	-0.00527	0.02657
511.554	0.06344	0.04283	-0.0051	0.02612
511.761	0.06381	0.04307	-0.00493	0.02569
511.968	0.06418	0.04331	-0.00476	0.02525
512.175	0.06455	0.04356	-0.00459	0.02482
512.382	0.06492	0.0438	-0.00441	0.0244
512.589	0.0653	0.04405	-0.00424	0.02398
512.796	0.06567	0.0443	-0.00406	0.02356
513.003	0.06604	0.04455	-0.00388	0.02315
513.21	0.06641	0.04481	-0.0037	0.02274
513.417	0.06678	0.04507	-0.00352	0.02234
513.624	0.06716	0.04533	-0.00334	0.02194
513.831	0.06753	0.04559	-0.00315	0.02154
514.038	0.06791	0.04586	-0.00297	0.02115
514.245	0.06828	0.04612	-0.00278	0.02076
514.451	0.06865	0.04639	-0.0026	0.02037
514.658	0.06903	0.04667	-0.00241	0.01999
514.865	0.0694	0.04694	-0.00222	0.01961
515.072	0.06978	0.04722	-0.00203	0.01923
515.279	0.07015	0.04749	-0.00184	0.01886
515.485	0.07052	0.04777	-0.00165	0.01848
515.692	0.0709	0.04806	-0.00146	0.01811
515.899	0.07127	0.04834	-0.00127	0.01774
516.106	0.07165	0.04863	-0.00108	0.01738
516.312	0.07202	0.04892	-0.000894672	0.01701
516.519	0.0724	0.04921	-0.000704833	0.01665
516.726	0.07277	0.04951	-0.000514469	0.01629
516.932	0.07314	0.0498	-0.000323855	0.01593
517.139	0.07352	0.0501	-0.000133137	0.01558
517.346	0.07389	0.0504	5.78324e-05	0.01522
517.552	0.07426	0.05071	0.000249284	0.01487
517.759	0.07463	0.05101	0.000441277	0.01452
517.965	0.075	0.05132	0.000633954	0.01418
518.172	0.07538	0.05163	0.000827553	0.01383
518.379	0.07575	0.05194	0.00102	0.01349
518.585	0.07612	0.05226	0.00122	0.01316
518.792	0.07649	0.05258	0.00142	0.01282
518.998	0.07687	0.0529	0.00162	0.01249
519.205	0.07724	0.05322	0.00182	0.01217
519.411	0.07761	0.05355	0.00202	0.01184
519.618	0.07798	0.05388	0.00223	0.01153
519.824	0.07836	0.05421	0.00244	0.01121
520.03	0.07873	0.05455	0.00265	0.0109
520.237	0.07911	0.05489	0.00286	0.01059
520.443	0.07948	0.05523	0.00307	0.01029
520.649	0.07985	0.05557	0.00329	0.00999
520.856	0.08023	0.05592	0.00351	0.0097
521.062	0.0806	0.05627	0.00373	0.0094
521.268	0.08098	0.05662	0.00396	0.00912
521.475	0.08135	0.05698	0.00418	0.00883
521.681	0.08173	0.05734	0.00441	0.00855
521.887	0.08211	0.0577	0.00464	0.00827
522.094	0.08248	0.05806	0.00487	0.008
522.3	0.08286	0.05843	0.00511	0.00773
522.506	0.08324	0.0588	0.00535	0.00746
522.712	0.08362	0.05918	0.00559	0.0072
522.918	0.084	0.05955	0.00583	0.00694
523.124	0.08437	0.05993	0.00607	0.00668
523.331	0.08475	0.06032	0.00631	0.00643
523.537	0.08513	0.0607	0.00656	0.00618
523.743	0.08551	0.06109	0.00681	0.00593
523.949	0.08589	0.06148	0.00706	0.00568
524.155	0.08627	0.06188	0.00731	0.00544
524.361	0.08664	0.06227	0.00756	0.0052
524.567	0.08702	0.06267	0.00781	0.00495
524.773	0.0874	0.06307	0.00806	0.00471
524.979	0.08777	0.06347	0.00831	0.00448
525.185	0.08815	0.06388	0.00857	0.00424
525.391	0.08852	0.06428	0.00882	0.00401
525.597	0.0889	0.06469	0.00907	0.00377
525.803	0.08927	0.0651	0.00933	0.00354
526.009	0.08964	0.06551	0.00958	0.00331
526.215	0.09001	0.06593	0.00984	0.00308
526.421	0.09037	0.06634	0.0101	0.00286
526.627	0.09074	0.06676	0.01035	0.00263
526.832	0.09111	0.06718	0.01061	0.00241
527.038	0.09147	0.06759	0.01087	0.00219
527.244	0.09183	0.06801	0.01114	0.00197
527.45	0.09219	0.06844	0.0114	0.00175
527.656	0.09255	0.06886	0.01166	0.00153
527.861	0.0929	0.06928	0.01193	0.00132
528.067	0.09325	0.06971	0.01219	0.00111
528.273	0.0936	0.07013	0.01246	0.00089675
528.479	0.09395	0.07056	0.01272	0.000686531
528.684	0.0943	0.07098	0.01299	0.000477257
528.89	0.09464	0.07141	0.01326	0.000268843
529.096	0.09498	0.07184	0.01352	6.12242e-05
529.301	0.09532	0.07227	0.01379	-0.000145691
529.507	0.09566	0.0727	0.01406	-0.00035204
529.713	0.09599	0.07313	0.01433	-0.000557877
529.918	0.09632	0.07356	0.01459	-0.000763005
530.124	0.09665	0.07399	0.01486	-0.000967379
530.329	0.09698	0.07442	0.01513	-0.00117
530.535	0.0973	0.07485	0.0154	-0.00137
530.741	0.09762	0.07528	0.01567	-0.00158
530.946	0.09793	0.07571	0.01594	-0.00178
531.152	0.09824	0.07614	0.01621	-0.00198
531.357	0.09855	0.07657	0.01648	-0.00218
531.562	0.09886	0.077	0.01676	-0.00238
531.768	0.09916	0.07743	0.01703	-0.00258
531.973	0.09946	0.07787	0.0173	-0.00277
532.179	0.09976	0.0783	0.01758	-0.00297
532.384	0.10005	0.07873	0.01785	-0.00317
532.59	0.10034	0.07916	0.01813	-0.00336
532.795	0.10062	0.07959	0.01841	-0.00356
533	0.10091	0.08003	0.01868	-0.00375
533.206	0.10119	0.08046	0.01896	-0.00395
533.411	0.10147	0.0809	0.01924	-0.00414
533.616	0.10174	0.08133	0.01952	-0.00434
533.822	0.10202	0.08177	0.0198	-0.00453
534.027	0.10229	0.08221	0.02008	-0.00472
534.232	0.10256	0.08265	0.02036	-0.00491
534.437	0.10282	0.08309	0.02064	-0.00511
534.642	0.10309	0.08353	0.02092	-0.0053
534.848	0.10335	0.08397	0.02121	-0.00549
535.053	0.10361	0.08441	0.02149	-0.00568
535.258	0.10387	0.08486	0.02177	-0.00587
535.463	0.10412	0.08531	0.02206	-0.00606
535.668	0.10438	0.08576	0.02235	-0.00624
535.873	0.10463	0.08621	0.02263	-0.00643
536.079	0.10488	0.08666	0.02292	-0.00662
536.284	0.10513	0.08711	0.02321	-0.0068
536.489	0.10538	0.08757	0.0235	-0.00699
536.694	0.10562	0.08802	0.02379	-0.00717
536.899	0.10586	0.08848	0.02409	-0.00736
537.104	0.1061	0.08894	0.02438	-0.00754
537.309	0.10634	0.08941	0.02467	-0.00772
537.514	0.10658	0.08987	0.02497	-0.0079
537.719	0.10682	0.09034	0.02527	-0.00808
537.924	0.10705	0.0908	0.02557	-0.00826
538.129	0.10729	0.09127	0.02587	-0.00843
538.334	0.10752	0.09174	0.02618	-0.00861
538.538	0.10775	0.09221	0.02649	-0.00878
538.743	0.10797	0.09269	0.0268	-0.00895
538.948	0.1082	0.09316	0.02711	-0.00912
539.153	0.10842	0.09364	0.02742	-0.00928
539.358	0.10865	0.09412	0.02774	-0.00945
539.563	0.10887	0.0946	0.02806	-0.00961
539.767	0.10909	0.09508	0.02838	-0.00977
539.972	0.10931	0.09557	0.0287	-0.00993
540.177	0.10953	0.09606	0.02903	-0.01008
540.382	0.10974	0.09655	0.02936	-0.01024
540.586	0.10996	0.09704	0.02969	-0.01039
540.791	0.11018	0.09754	0.03002	-0.01054
540.996	0.11039	0.09803	0.03036	-0.01068
541.201	0.1106	0.09853	0.0307	-0.01083
541.405	0.11082	0.09903	0.03105	-0.01097
541.61	0.11103	0.09954	0.03139	-0.01111
541.814	0.11124	0.10004	0.03174	-0.01125
542.019	0.11145	0.10055	0.03209	-0.01139
542.224	0.11165	0.10106	0.03245	-0.01152
542.428	0.11186	0.10157	0.0328	-0.01166
542.633	0.11207	0.10208	0.03316	-0.01179
542.837	0.11227	0.1026	0.03352	-0.01192
543.042	0.11247	0.10311	0.03388	-0.01206
543.246	0.11267	0.10363	0.03424	-0.01219
543.451	0.11287	0.10415	0.0346	-0.01231
543.655	0.11306	0.10467	0.03497	-0.01244
543.86	0.11326	0.10519	0.03534	-0.01257
544.064	0.11345	0.10571	0.03571	-0.01269
544.269	0.11364	0.10623	0.03609	-0.01281
544.473	0.11383	0.10676	0.03647	-0.01293
544.677	0.11402	0.10728	0.03685	-0.01305
544.882	0.1142	0.10781	0.03723	-0.01316
545.086	0.11439	0.10834	0.03762	-0.01328
545.291	0.11457	0.10886	0.03801	-0.01339
545.495	0.11475	0.10939	0.0384	-0.0135
545.699	0.11493	0.10993	0.03879	-0.01361
545.903	0.11511	0.11046	0.03919	-0.01371
546.108	0.11528	0.11099	0.03959	-0.01381
546.312	0.11546	0.11153	0.04	-0.01391
546.516	0.11563	0.11206	0.04041	-0.01401
546.72	0.1158	0.1126	0.04082	-0.01411
546.925	0.11597	0.11314	0.04123	-0.0142
547.129	0.11614	0.11368	0.04165	-0.01429
547.333	0.11631	0.11422	0.04207	-0.01439
547.537	0.11647	0.11477	0.04249	-0.01448
547.741	0.11664	0.11531	0.04291	-0.01457
547.945	0.1168	0.11586	0.04333	-0.01465
548.15	0.11696	0.1164	0.04376	-0.01474
548.354	0.11712	0.11695	0.04419	-0.01483
548.558	0.11727	0.11749	0.04462	-0.01491
548.762	0.11743	0.11804	0.04505	-0.01499
548.966	0.11758	0.11859	0.04549	-0.01508
549.17	0.11773	0.11914	0.04593	-0.01516
549.374	0.11787	0.11968	0.04637	-0.01523
549.578	0.11802	0.12023	0.04682	-0.01531
549.782	0.11816	0.12078	0.04726	-0.01539
549.986	0.11829	0.12132	0.04771	-0.01546
550.19	0.11843	0.12187	0.04816	-0.01554
550.394	0.11856	0.12241	0.04861	-0.01561
550.598	0.11869	0.12295	0.04907	-0.01568
550.801	0.11881	0.12349	0.04953	-0.01575
551.005	0.11894	0.12403	0.04999	-0.01582
551.209	0.11905	0.12457	0.05045	-0.01589
551.413	0.11917	0.12511	0.05091	-0.01596
551.617	0.11928	0.12565	0.05137	-0.01603
551.821	0.11939	0.12619	0.05184	-0.0161
552.024	0.11949	0.12672	0.05231	-0.01617
552.228	0.11959	0.12726	0.05277	-0.01624
552.432	0.11969	0.12779	0.05324	-0.01631
552.636	0.11978	0.12832	0.05371	-0.01638
552.839	0.11987	0.12885	0.05419	-0.01645
553.043	0.11996	0.12938	0.05466	-0.01651
553.247	0.12004	0.12991	0.05514	-0.01658
553.45	0.12012	0.13043	0.05562	-0.01665
553.654	0.12019	0.13095	0.05609	-0.01672
553.858	0.12026	0.13148	0.05658	-0.01678
554.061	0.12033	0.132	0.05706	-0.01685
554.265	0.1204	0.13252	0.05754	-0.01691
554.469	0.12046	0.13303	0.05803	-0.01698
554.672	0.12051	0.13355	0.05852	-0.01704
554.876	0.12057	0.13407	0.05901	-0.01711
555.079	0.12062	0.13458	0.0595	-0.01717
555.283	0.12066	0.1351	0.05999	-0.01724
555.486	0.12071	0.13561	0.06049	-0.0173
555.69	0.12075	0.13612	0.06099	-0.01736
555.893	0.12079	0.13663	0.06149	-0.01743
556.097	0.12082	0.13714	0.06199	-0.01749
556.3	0.12085	0.13765	0.06249	-0.01755
556.503	0.12088	0.13816	0.063	-0.01761
556.707	0.12091	0.13867	0.0635	-0.01767
556.91	0.12094	0.13918	0.06401	-0.01773
557.114	0.12096	0.13968	0.06452	-0.01779
557.317	0.12098	0.14019	0.06504	-0.01785
557.52	0.121	0.1407	0.06555	-0.01791
557.724	0.12101	0.14121	0.06606	-0.01796
557.927	0.12102	0.14171	0.06658	-0.01802
558.13	0.12103	0.14222	0.0671	-0.01808
558.333	0.12104	0.14273	0.06762	-0.01814
558.537	0.12105	0.14323	0.06814	-0.0182
558.74	0.12106	0.14374	0.06866	-0.01826
558.943	0.12106	0.14425	0.06918	-0.01832
559.146	0.12106	0.14476	0.06971	-0.01838
559.35	0.12106	0.14527	0.07023	-0.01844
559.553	0.12106	0.14577	0.07075	-0.0185
559.756	0.12106	0.14628	0.07128	-0.01857
559.959	0.12106	0.14679	0.0718	-0.01863
560.162	0.12105	0.1473	0.07233	-0.01869
560.365	0.12104	0.14782	0.07286	-0.01876
560.568	0.12104	0.14833	0.07339	-0.01882
560.771	0.12103	0.14884	0.07392	-0.01889
560.974	0.12102	0.14935	0.07445	-0.01895
561.177	0.121	0.14987	0.07498	-0.01901
561.38	0.12099	0.15038	0.07551	-0.01908
561.583	0.12098	0.15089	0.07604	-0.01914
561.786	0.12096	0.15141	0.07658	-0.01921
561.989	0.12094	0.15193	0.07711	-0.01927
562.192	0.12093	0.15244	0.07765	-0.01934
562.395	0.12091	0.15296	0.07819	-0.0194
562.598	0.12089	0.15348	0.07873	-0.01946
562.801	0.12087	0.154	0.07927	-0.01953
563.004	0.12085	0.15452	0.07982	-0.01959
563.207	0.12082	0.15504	0.08036	-0.01965
563.41	0.1208	0.15556	0.08091	-0.01971
563.612	0.12077	0.15608	0.08146	-0.01977
563.815	0.12075	0.1566	0.08201	-0.01983
564.018	0.12072	0.15713	0.08257	-0.01988
564.221	0.12069	0.15765	0.08312	-0.01994
564.424	0.12067	0.15817	0.08368	-0.02
564.626	0.12064	0.1587	0.08424	-0.02005
564.829	0.12061	0.15922	0.08481	-0.0201
565.032	0.12058	0.15975	0.08537	-0.02015
565.234	0.12054	0.16027	0.08594	-0.0202
565.437	0.12051	0.1608	0.08651	-0.02025
565.64	0.12047	0.16132	0.08708	-0.0203
565.842	0.12044	0.16185	0.08766	-0.02034
566.045	0.1204	0.16237	0.08824	-0.02039
566.248	0.12036	0.1629	0.08882	-0.02043
566.45	0.12032	0.16342	0.0894	-0.02047
566.653	0.12027	0.16394	0.08999	-0.02051
566.855	0.12023	0.16446	0.09057	-0.02055
567.058	0.12018	0.16498	0.09116	-0.02059
567.26	0.12013	0.1655	0.09176	-0.02063
567.463	0.12008	0.16601	0.09235	-0.02066
567.665	0.12002	0.16653	0.09295	-0.02069
567.868	0.11996	0.16704	0.09355	-0.02073
568.07	0.1199	0.16755	0.09415	-0.02076
568.273	0.11983	0.16806	0.09475	-0.02078
568.475	0.11976	0.16856	0.09536	-0.02081
568.678	0.11969	0.16906	0.09597	-0.02084
568.88	0.11962	0.16956	0.09658	-0.02087
569.082	0.11954	0.17006	0.09719	-0.02089
569.285	0.11946	0.17056	0.0978	-0.02092
569.487	0.11938	0.17105	0.09842	-0.02094
569.689	0.11929	0.17154	0.09903	-0.02096
569.892	0.1192	0.17203	0.09965	-0.02099
570.094	0.11911	0.17251	0.10027	-0.02101
570.296	0.11902	0.173	0.10089	-0.02103
570.499	0.11892	0.17348	0.10151	-0.02106
570.701	0.11882	0.17395	0.10213	-0.02108
570.903	0.11871	0.17443	0.10275	-0.0211
571.105	0.1186	0.1749	0.10337	-0.02113
571.307	0.11849	0.17537	0.104	-0.02115
571.51	0.11838	0.17584	0.10462	-0.02117
571.712	0.11826	0.1763	0.10525	-0.0212
571.914	0.11814	0.17676	0.10587	-0.02122
572.116	0.11802	0.17722	0.1065	-0.02124
572.318	0.11789	0.17768	0.10713	-0.02126
572.52	0.11776	0.17813	0.10776	-0.02129
572.722	0.11763	0.17858	0.10839	-0.02131
572.924	0.1175	0.17903	0.10902	-0.02133
573.126	0.11736	0.17948	0.10966	-0.02136
573.328	0.11722	0.17992	0.11029	-0.02138
573.53	0.11708	0.18036	0.11092	-0.0214
573.732	0.11693	0.1808	0.11156	-0.02143
573.934	0.11678	0.18123	0.11219	-0.02145
574.136	0.11663	0.18167	0.11283	-0.02148
574.338	0.11648	0.1821	0.11346	-0.02151
574.54	0.11632	0.18252	0.11409	-0.02154
574.742	0.11616	0.18295	0.11473	-0.02157
574.944	0.116	0.18337	0.11536	-0.0216
575.146	0.11583	0.18379	0.116	-0.02163
575.348	0.11567	0.1842	0.11663	-0.02167
575.55	0.1155	0.18462	0.11727	-0.0217
575.751	0.11532	0.18503	0.1179	-0.02174
575.953	0.11515	0.18544	0.11854	-0.02178
576.155	0.11497	0.18584	0.11917	-0.02181
576.357	0.11479	0.18624	0.11981	-0.02185
576.558	0.1146	0.18664	0.12044	-0.02189
576.76	0.11442	0.18704	0.12108	-0.02193
576.962	0.11423	0.18744	0.12172	-0.02197
577.164	0.11404	0.18783	0.12235	-0.02201
577.365	0.11385	0.18822	0.12299	-0.02205
577.567	0.11365	0.18861	0.12363	-0.02209
577.769	0.11346	0.189	0.12427	-0.02213
577.97	0.11326	0.18939	0.12492	-0.02218
578.172	0.11306	0.18977	0.12556	-0.02222
578.373	0.11286	0.19015	0.1262	-0.02226
578.575	0.11266	0.19054	0.12685	-0.0223
578.777	0.11246	0.19092	0.12749	-0.02234
578.978	0.11225	0.19129	0.12814	-0.02238
579.18	0.11205	0.19167	0.12878	-0.02242
579.381	0.11184	0.19205	0.12943	-0.02246
579.583	0.11164	0.19242	0.13008	-0.0225
579.784	0.11143	0.1928	0.13073	-0.02254
579.986	0.11122	0.19317	0.13138	-0.02258
580.187	0.11102	0.19354	0.13203	-0.02262
580.389	0.11081	0.19391	0.13268	-0.02265
580.59	0.1106	0.19428	0.13333	-0.02269
580.791	0.11039	0.19465	0.13399	-0.02273
580.993	0.11018	0.19502	0.13464	-0.02277
581.194	0.10997	0.19539	0.1353	-0.02281
581.395	0.10976	0.19576	0.13596	-0.02284
581.597	0.10955	0.19612	0.13662	-0.02288
581.798	0.10934	0.19649	0.13728	-0.02291
581.999	0.10913	0.19685	0.13794	-0.02295
582.201	0.10891	0.19721	0.1386	-0.02298
582.402	0.1087	0.19758	0.13927	-0.02301
582.603	0.10849	0.19794	0.13993	-0.02304
582.804	0.10828	0.1983	0.1406	-0.02307
583.006	0.10806	0.19865	0.14127	-0.02309
583.207	0.10785	0.19901	0.14195	-0.02312
583.408	0.10764	0.19937	0.14262	-0.02314
583.609	0.10742	0.19972	0.1433	-0.02317
583.81	0.10721	0.20007	0.14397	-0.02319
584.011	0.10699	0.20042	0.14465	-0.02321
584.213	0.10678	0.20077	0.14533	-0.02323
584.414	0.10656	0.20112	0.14602	-0.02324
584.615	0.10634	0.20146	0.1467	-0.02326
584.816	0.10612	0.2018	0.14739	-0.02327
585.017	0.1059	0.20214	0.14807	-0.02329
585.218	0.10568	0.20248	0.14876	-0.0233
585.419	0.10546	0.20282	0.14945	-0.02331
585.62	0.10524	0.20315	0.15014	-0.02332
585.821	0.10501	0.20348	0.15083	-0.02333
586.022	0.10479	0.20381	0.15153	-0.02334
586.223	0.10456	0.20414	0.15222	-0.02335
586.424	0.10434	0.20446	0.15291	-0.02336
586.625	0.10411	0.20478	0.15361	-0.02336
586.826	0.10388	0.2051	0.15431	-0.02337
587.026	0.10365	0.20542	0.155	-0.02338
587.227	0.10342	0.20573	0.1557	-0.02338
587.428	0.10319	0.20604	0.1564	-0.02339
587.629	0.10295	0.20635	0.1571	-0.02339
587.83	0.10272	0.20665	0.1578	-0.0234
588.031	0.10248	0.20696	0.1585	-0.0234
588.231	0.10225	0.20725	0.1592	-0.02341
588.432	0.10201	0.20755	0.1599	-0.02341
588.633	0.10177	0.20784	0.1606	-0.02342
588.834	0.10152	0.20813	0.16131	-0.02342
589.034	0.10128	0.20842	0.16201	-0.02342
589.235	0.10104	0.2087	0.16272	-0.02343
589.436	0.10079	0.20898	0.16342	-0.02343
589.636	0.10054	0.20925	0.16413	-0.02344
589.837	0.10029	0.20953	0.16483	-0.02344
590.038	0.10004	0.2098	0.16554	-0.02344
590.238	0.09978	0.21006	0.16625	-0.02345
590.439	0.09953	0.21032	0.16695	-0.02345
590.639	0.09927	0.21058	0.16766	-0.02346
590.84	0.09901	0.21084	0.16837	-0.02346
591.04	0.09875	0.21109	0.16907	-0.02347
591.241	0.09849	0.21134	0.16978	-0.02348
591.441	0.09822	0.21158	0.17048	-0.02348
591.642	0.09796	0.21182	0.17119	-0.02349
591.842	0.09769	0.21206	0.1719	-0.0235
592.043	0.09742	0.21229	0.1726	-0.02351
592.243	0.09715	0.21252	0.1733	-0.02352
592.444	0.09688	0.21275	0.17401	-0.02353
592.644	0.0966	0.21297	0.17471	-0.02354
592.845	0.09633	0.21319	0.17541	-0.02355
593.045	0.09605	0.21341	0.17611	-0.02357
593.245	0.09578	0.21362	0.17681	-0.02358
593.446	0.0955	0.21383	0.17752	-0.02359
593.646	0.09522	0.21404	0.17822	-0.02361
593.846	0.09493	0.21424	0.17892	-0.02362
594.047	0.09465	0.21444	0.17962	-0.02363
594.247	0.09437	0.21464	0.18032	-0.02364
594.447	0.09408	0.21483	0.18102	-0.02366
594.647	0.09379	0.21502	0.18172	-0.02367
594.848	0.0935	0.21521	0.18242	-0.02368
595.048	0.09322	0.21539	0.18312	-0.02369
595.248	0.09293	0.21557	0.18382	-0.0237
595.448	0.09264	0.21575	0.18452	-0.02371
595.648	0.09235	0.21593	0.18522	-0.02372
595.848	0.09205	0.2161	0.18592	-0.02373
596.049	0.09176	0.21627	0.18661	-0.02374
596.249	0.09147	0.21644	0.18731	-0.02375
596.449	0.09118	0.2166	0.18801	-0.02376
596.649	0.09089	0.21677	0.1887	-0.02376
596.849	0.0906	0.21693	0.1894	-0.02377
597.049	0.09031	0.21709	0.19009	-0.02378
597.249	0.09001	0.21725	0.19079	-0.02379
597.449	0.08972	0.2174	0.19148	-0.02379
597.649	0.08943	0.21755	0.19217	-0.0238
597.849	0.08914	0.21771	0.19287	-0.02381
598.049	0.08885	0.21785	0.19356	-0.02381
598.249	0.08856	0.218	0.19425	-0.02382
598.449	0.08827	0.21815	0.19494	-0.02383
598.649	0.08798	0.21829	0.19562	-0.02384
598.848	0.0877	0.21843	0.19631	-0.02384
599.048	0.08741	0.21857	0.197	-0.02385
599.248	0.08712	0.21871	0.19768	-0.02386
599.448	0.08683	0.21884	0.19837	-0.02387
599.648	0.08654	0.21897	0.19905	-0.02387
599.848	0.08626	0.2191	0.19973	-0.02388
600.047	0.08597	0.21923	0.20041	-0.02389
600.247	0.08568	0.21936	0.20109	-0.0239
600.447	0.0854	0.21948	0.20177	-0.02391
600.647	0.08511	0.2196	0.20245	-0.02392
600.846	0.08482	0.21972	0.20313	-0.02392
601.046	0.08454	0.21983	0.2038	-0.02393
601.246	0.08425	0.21994	0.20448	-0.02394
601.445	0.08397	0.22005	0.20515	-0.02395
601.645	0.08368	0.22016	0.20582	-0.02397
601.845	0.08339	0.22027	0.20649	-0.02398
602.044	0.08311	0.22037	0.20716	-0.02399
602.244	0.08282	0.22047	0.20783	-0.024
602.444	0.08253	0.22056	0.2085	-0.02401
602.643	0.08224	0.22065	0.20916	-0.02403
602.843	0.08196	0.22074	0.20983	-0.02404
603.042	0.08167	0.22083	0.21049	-0.02406
603.242	0.08138	0.22091	0.21115	-0.02407
603.441	0.08109	0.22099	0.2118	-0.02409
603.641	0.0808	0.22106	0.21246	-0.02411
603.84	0.0805	0.22113	0.21311	-0.02413
604.04	0.08021	0.2212	0.21376	-0.02415
604.239	0.07992	0.22127	0.21441	-0.02417
604.438	0.07963	0.22133	0.21506	-0.02419
604.638	0.07933	0.22139	0.21571	-0.02422
604.837	0.07904	0.22145	0.21636	-0.02424
605.037	0.07874	0.2215	0.217	-0.02427
605.236	0.07844	0.22155	0.21764	-0.02429
605.435	0.07815	0.22159	0.21829	-0.02432
605.635	0.07785	0.22163	0.21893	-0.02434
605.834	0.07754	0.22167	0.21957	-0.02437
606.033	0.07724	0.2217	0.22021	-0.02439
606.232	0.07694	0.22173	0.22085	-0.02442
606.432	0.07664	0.22175	0.22149	-0.02444
606.631	0.07633	0.22177	0.22213	-0.02447
606.83	0.07603	0.22179	0.22276	-0.02449
607.029	0.07572	0.22181	0.2234	-0.02451
607.228	0.07541	0.22182	0.22404	-0.02453
607.428	0.0751	0.22182	0.22468	-0.02456
607.627	0.07479	0.22183	0.22532	-0.02458
607.826	0.07449	0.22183	0.22595	-0.0246
608.025	0.07417	0.22182	0.22659	-0.02461
608.224	0.07386	0.22182	0.22723	-0.02463
608.423	0.07355	0.22181	0.22787	-0.02465
608.622	0.07324	0.2218	0.2285	-0.02467
608.821	0.07293	0.22178	0.22914	-0.02468
609.02	0.07261	0.22176	0.22977	-0.0247
609.219	0.0723	0.22174	0.23041	-0.02472
609.418	0.07199	0.22171	0.23104	-0.02473
609.617	0.07167	0.22168	0.23168	-0.02474
609.816	0.07136	0.22165	0.23231	-0.02476
610.015	0.07104	0.22161	0.23294	-0.02477
610.214	0.07073	0.22157	0.23358	-0.02478
610.413	0.07041	0.22153	0.23421	-0.02479
610.612	0.0701	0.22148	0.23484	-0.0248
610.811	0.06978	0.22144	0.23547	-0.02481
611.01	0.06946	0.22138	0.23611	-0.02482
611.209	0.06915	0.22133	0.23674	-0.02483
611.407	0.06883	0.22127	0.23737	-0.02484
611.606	0.06852	0.22121	0.238	-0.02484
611.805	0.0682	0.22114	0.23863	-0.02485
612.004	0.06788	0.22108	0.23926	-0.02486
612.202	0.06757	0.221	0.23988	-0.02486
612.401	0.06725	0.22093	0.24051	-0.02487
612.6	0.06694	0.22085	0.24114	-0.02488
612.799	0.06662	0.22077	0.24176	-0.02488
612.997	0.06631	0.22069	0.24238	-0.02489
613.196	0.06599	0.22061	0.24301	-0.02489
613.395	0.06568	0.22052	0.24363	-0.0249
613.593	0.06536	0.22043	0.24425	-0.02491
613.792	0.06505	0.22034	0.24486	-0.02492
613.991	0.06474	0.22024	0.24548	-0.02492
614.189	0.06442	0.22014	0.2461	-0.02493
614.388	0.06411	0.22004	0.24671	-0.02494
614.586	0.0638	0.21994	0.24732	-0.02495
614.785	0.06349	0.21983	0.24793	-0.02496
614.983	0.06318	0.21972	0.24855	-0.02497
615.182	0.06287	0.21961	0.24915	-0.02498
615.38	0.06256	0.2195	0.24976	-0.02499
615.579	0.06225	0.21938	0.25037	-0.025
615.777	0.06194	0.21927	0.25097	-0.02501
615.976	0.06164	0.21914	0.25158	-0.02502
616.174	0.06133	0.21902	0.25218	-0.02503
616.373	0.06103	0.21889	0.25278	-0.02504
616.571	0.06072	0.21876	0.25338	-0.02505
616.769	0.06041	0.21863	0.25398	-0.02507
616.968	0.06011	0.2185	0.25457	-0.02508
617.166	0.05981	0.21836	0.25517	-0.02509
617.364	0.0595	0.21821	0.25576	-0.02511
617.563	0.0592	0.21807	0.25635	-0.02512
617.761	0.05889	0.21792	0.25694	-0.02514
617.959	0.05859	0.21777	0.25753	-0.02515
618.157	0.05829	0.21761	0.25812	-0.02517
618.356	0.05798	0.21746	0.2587	-0.02518
618.554	0.05768	0.2173	0.25928	-0.0252
618.752	0.05737	0.21713	0.25987	-0.02521
618.95	0.05707	0.21696	0.26045	-0.02523
619.148	0.05677	0.21679	0.26102	-0.02524
619.347	0.05646	0.21662	0.2616	-0.02526
619.545	0.05616	0.21644	0.26218	-0.02527
619.743	0.05586	0.21626	0.26275	-0.02529
619.941	0.05555	0.21608	0.26332	-0.0253
620.139	0.05525	0.21589	0.26389	-0.02531
620.337	0.05495	0.2157	0.26446	-0.02533
620.535	0.05464	0.21551	0.26503	-0.02534
620.733	0.05434	0.21531	0.26559	-0.02535
620.931	0.05403	0.21511	0.26616	-0.02537
621.129	0.05373	0.21491	0.26672	-0.02538
621.327	0.05342	0.21471	0.26728	-0.02539
621.525	0.05312	0.2145	0.26784	-0.0254
621.723	0.05282	0.21429	0.26839	-0.02542
621.921	0.05251	0.21408	0.26895	-0.02543
622.119	0.05221	0.21386	0.2695	-0.02544
622.317	0.0519	0.21364	0.27006	-0.02545
622.515	0.0516	0.21342	0.27061	-0.02546
622.713	0.0513	0.2132	0.27116	-0.02546
622.91	0.051	0.21298	0.27171	-0.02547
623.108	0.0507	0.21275	0.27225	-0.02548
623.306	0.0504	0.21252	0.2728	-0.02549
623.504	0.0501	0.21229	0.27335	-0.02549
623.702	0.0498	0.21205	0.27389	-0.02549
623.899	0.0495	0.21182	0.27444	-0.0255
624.097	0.0492	0.21158	0.27498	-0.0255
624.295	0.0489	0.21134	0.27553	-0.0255
624.493	0.0486	0.2111	0.27607	-0.0255
624.69	0.0483	0.21085	0.27661	-0.0255
624.888	0.04801	0.21061	0.27715	-0.0255
625.086	0.04771	0.21036	0.27769	-0.0255
625.283	0.04741	0.21011	0.27823	-0.0255
625.481	0.04712	0.20986	0.27877	-0.02549
625.679	0.04683	0.20961	0.2793	-0.02549
625.876	0.04653	0.20935	0.27984	-0.02549
626.074	0.04624	0.2091	0.28037	-0.02548
626.271	0.04595	0.20884	0.2809	-0.02548
626.469	0.04566	0.20858	0.28144	-0.02548
626.666	0.04537	0.20832	0.28197	-0.02547
626.864	0.04508	0.20806	0.2825	-0.02547
627.061	0.04479	0.20779	0.28302	-0.02546
627.259	0.0445	0.20753	0.28355	-0.02546
627.456	0.04421	0.20726	0.28408	-0.02546
627.654	0.04393	0.20699	0.2846	-0.02545
627.851	0.04364	0.20672	0.28512	-0.02545
628.049	0.04336	0.20644	0.28564	-0.02545
628.246	0.04307	0.20617	0.28616	-0.02545
628.443	0.04279	0.20589	0.28668	-0.02545
628.641	0.04251	0.20561	0.28719	-0.02544
628.838	0.04222	0.20533	0.28771	-0.02544
629.036	0.04194	0.20505	0.28822	-0.02544
629.233	0.04167	0.20477	0.28873	-0.02544
629.43	0.04139	0.20449	0.28924	-0.02544
629.627	0.04111	0.2042	0.28975	-0.02545
629.825	0.04084	0.20392	0.29026	-0.02545
630.022	0.04057	0.20363	0.29077	-0.02545
630.219	0.04029	0.20334	0.29127	-0.02545
630.416	0.04003	0.20305	0.29178	-0.02545
630.614	0.03976	0.20277	0.29228	-0.02545
630.811	0.03949	0.20247	0.29279	-0.02545
631.008	0.03923	0.20218	0.29329	-0.02545
631.205	0.03896	0.20189	0.29379	-0.02545
631.402	0.0387	0.2016	0.2943	-0.02545
631.599	0.03844	0.2013	0.2948	-0.02545
631.796	0.03819	0.20101	0.2953	-0.02545
631.993	0.03793	0.20071	0.2958	-0.02545
632.19	0.03768	0.20041	0.2963	-0.02545
632.388	0.03742	0.20011	0.2968	-0.02545
632.585	0.03717	0.19981	0.2973	-0.02545
632.782	0.03692	0.19951	0.2978	-0.02544
632.979	0.03667	0.19921	0.2983	-0.02544
633.176	0.03642	0.1989	0.2988	-0.02544
633.372	0.03617	0.19859	0.29929	-0.02544
633.569	0.03593	0.19828	0.29979	-0.02543
633.766	0.03568	0.19797	0.30029	-0.02543
633.963	0.03543	0.19765	0.30078	-0.02542
634.16	0.03519	0.19733	0.30127	-0.02542
634.357	0.03494	0.19701	0.30177	-0.02542
634.554	0.0347	0.19669	0.30226	-0.02541
634.751	0.03445	0.19636	0.30275	-0.0254
634.948	0.03421	0.19604	0.30325	-0.02539
635.144	0.03397	0.19571	0.30374	-0.02539
635.341	0.03372	0.19537	0.30423	-0.02538
635.538	0.03348	0.19504	0.30472	-0.02536
635.735	0.03324	0.1947	0.30521	-0.02535
635.931	0.033	0.19436	0.3057	-0.02534
636.128	0.03275	0.19402	0.30619	-0.02533
636.325	0.03251	0.19367	0.30668	-0.02531
636.522	0.03227	0.19332	0.30717	-0.02529
636.718	0.03203	0.19297	0.30766	-0.02528
636.915	0.03179	0.19262	0.30815	-0.02526
637.112	0.03155	0.19226	0.30864	-0.02524
637.308	0.03131	0.1919	0.30913	-0.02521
637.505	0.03107	0.19154	0.30962	-0.02519
637.701	0.03082	0.19118	0.31011	-0.02517
637.898	0.03058	0.19081	0.3106	-0.02514
638.094	0.03034	0.19045	0.31109	-0.02512
638.291	0.0301	0.19008	0.31158	-0.02509
638.488	0.02987	0.18971	0.31207	-0.02506
638.684	0.02963	0.18933	0.31256	-0.02503
638.881	0.02939	0.18895	0.31305	-0.025
639.077	0.02915	0.18858	0.31354	-0.02496
639.273	0.02891	0.1882	0.31404	-0.02493
639.47	0.02867	0.18781	0.31453	-0.0249
639.666	0.02844	0.18743	0.31502	-0.02486
639.863	0.0282	0.18704	0.31551	-0.02482
640.059	0.02796	0.18665	0.316	-0.02478
640.255	0.02773	0.18626	0.31649	-0.02474
640.452	0.02749	0.18587	0.31698	-0.0247
640.648	0.02726	0.18548	0.31747	-0.02466
640.845	0.02702	0.18508	0.31796	-0.02462
641.041	0.02679	0.18468	0.31846	-0.02457
641.237	0.02655	0.18428	0.31895	-0.02453
641.433	0.02632	0.18387	0.31944	-0.02448
641.63	0.02608	0.18347	0.31993	-0.02443
641.826	0.02585	0.18306	0.32042	-0.02439
642.022	0.02562	0.18265	0.32091	-0.02434
642.218	0.02538	0.18224	0.3214	-0.02429
642.414	0.02515	0.18182	0.32189	-0.02424
642.611	0.02492	0.1814	0.32237	-0.0242
642.807	0.02469	0.18099	0.32286	-0.02415
643.003	0.02446	0.18056	0.32334	-0.0241
643.199	0.02422	0.18014	0.32382	-0.02406
643.395	0.02399	0.17972	0.3243	-0.02401
643.591	0.02376	0.17929	0.32478	-0.02397
643.787	0.02353	0.17886	0.32526	-0.02393
643.983	0.02331	0.17843	0.32573	-0.02389
644.179	0.02308	0.178	0.3262	-0.02386
644.375	0.02285	0.17756	0.32667	-0.02382
644.571	0.02263	0.17713	0.32713	-0.02379
644.767	0.0224	0.17669	0.3276	-0.02375
644.963	0.02218	0.17625	0.32806	-0.02372
645.159	0.02196	0.17581	0.32852	-0.0237
645.355	0.02174	0.17537	0.32897	-0.02367
645.551	0.02152	0.17493	0.32942	-0.02365
645.747	0.02131	0.17449	0.32987	-0.02362
645.943	0.02109	0.17405	0.33032	-0.0236
646.139	0.02088	0.1736	0.33076	-0.02359
646.335	0.02067	0.17316	0.3312	-0.02357
646.53	0.02046	0.17271	0.33164	-0.02356
646.726	0.02025	0.17227	0.33208	-0.02354
646.922	0.02004	0.17182	0.33251	-0.02353
647.118	0.01984	0.17138	0.33295	-0.02352
647.314	0.01964	0.17093	0.33338	-0.02352
647.509	0.01944	0.17049	0.3338	-0.02351
647.705	0.01924	0.17004	0.33423	-0.02351
647.901	0.01905	0.1696	0.33466	-0.0235
648.097	0.01886	0.16915	0.33508	-0.0235
648.292	0.01867	0.16871	0.3355	-0.0235
648.488	0.01848	0.16826	0.33592	-0.0235
648.684	0.01829	0.16782	0.33634	-0.0235
648.879	0.01811	0.16737	0.33675	-0.0235
649.075	0.01792	0.16693	0.33717	-0.0235
649.27	0.01774	0.16649	0.33759	-0.0235
649.466	0.01757	0.16604	0.338	-0.0235
649.662	0.01739	0.1656	0.33841	-0.02351
649.857	0.01722	0.16515	0.33882	-0.02351
650.053	0.01704	0.16471	0.33924	-0.02351
650.248	0.01687	0.16426	0.33965	-0.02352
650.444	0.0167	0.16382	0.34006	-0.02352
650.639	0.01654	0.16337	0.34046	-0.02353
650.835	0.01637	0.16293	0.34087	-0.02353
651.03	0.01621	0.16248	0.34128	-0.02354
651.225	0.01604	0.16204	0.34168	-0.02354
651.421	0.01588	0.16159	0.34209	-0.02355
651.616	0.01572	0.16115	0.34249	-0.02356
651.812	0.01556	0.1607	0.34289	-0.02356
652.007	0.0154	0.16025	0.34329	-0.02357
652.202	0.01524	0.1598	0.34369	-0.02358
652.398	0.01509	0.15935	0.34409	-0.02358
652.593	0.01493	0.1589	0.3445	-0.02359
652.788	0.01478	0.15845	0.3449	-0.0236
652.984	0.01462	0.158	0.3453	-0.0236
653.179	0.01447	0.15755	0.3457	-0.0236
653.374	0.01432	0.1571	0.3461	-0.02361
653.569	0.01417	0.15665	0.3465	-0.02361
653.764	0.01402	0.15619	0.34691	-0.02361
653.96	0.01387	0.15574	0.34731	-0.02361
654.155	0.01372	0.15529	0.34772	-0.02361
654.35	0.01357	0.15483	0.34812	-0.02361
654.545	0.01343	0.15437	0.34852	-0.02361
654.74	0.01328	0.15392	0.34893	-0.02361
654.935	0.01314	0.15346	0.34934	-0.02361
655.13	0.013	0.153	0.34974	-0.02361
655.326	0.01285	0.15255	0.35015	-0.02361
655.521	0.01271	0.15209	0.35056	-0.02361
655.716	0.01257	0.15163	0.35097	-0.0236
655.911	0.01243	0.15117	0.35138	-0.0236
656.106	0.01229	0.15071	0.35179	-0.0236
656.301	0.01216	0.15025	0.3522	-0.02359
656.496	0.01202	0.14979	0.35261	-0.02359
656.691	0.01188	0.14933	0.35303	-0.02358
656.886	0.01175	0.14887	0.35344	-0.02358
657.08	0.01161	0.14841	0.35386	-0.02357
657.275	0.01148	0.14794	0.35427	-0.02356
657.47	0.01135	0.14748	0.35469	-0.02356
657.665	0.01121	0.14702	0.35511	-0.02355
657.86	0.01108	0.14655	0.35553	-0.02354
658.055	0.01095	0.14609	0.35595	-0.02353
658.25	0.01082	0.14562	0.35637	-0.02352
658.444	0.01069	0.14515	0.3568	-0.02351
658.639	0.01056	0.14469	0.35722	-0.0235
658.834	0.01043	0.14422	0.35765	-0.02349
659.029	0.0103	0.14375	0.35807	-0.02348
659.224	0.01017	0.14328	0.3585	-0.02348
659.418	0.01004	0.14281	0.35893	-0.02347
659.613	0.00991	0.14233	0.35936	-0.02346
659.808	0.00978	0.14186	0.35978	-0.02345
660.002	0.00965	0.14139	0.36021	-0.02344
660.197	0.00952	0.14091	0.36065	-0.02343
660.392	0.0094	0.14043	0.36108	-0.02343
660.586	0.00927	0.13996	0.36151	-0.02342
660.781	0.00914	0.13948	0.36194	-0.02341
660.975	0.00901	0.139	0.36238	-0.02341
661.17	0.00888	0.13852	0.36281	-0.0234
661.365	0.00875	0.13804	0.36325	-0.0234
661.559	0.00863	0.13756	0.36368	-0.02339
661.754	0.0085	0.13708	0.36412	-0.02339
661.948	0.00837	0.1366	0.36455	-0.02338
662.143	0.00824	0.13611	0.36499	-0.02338
662.337	0.00812	0.13563	0.36543	-0.02337
662.532	0.00799	0.13515	0.36587	-0.02337
662.726	0.00787	0.13466	0.36631	-0.02337
662.92	0.00774	0.13418	0.36675	-0.02336
663.115	0.00761	0.13369	0.36719	-0.02336
663.309	0.00749	0.1332	0.36763	-0.02335
663.504	0.00736	0.13272	0.36808	-0.02335
663.698	0.00723	0.13223	0.36852	-0.02334
663.892	0.00711	0.13174	0.36897	-0.02334
664.087	0.00698	0.13125	0.36941	-0.02333
664.281	0.00686	0.13076	0.36986	-0.02332
664.475	0.00673	0.13027	0.3703	-0.02332
664.669	0.00661	0.12978	0.37075	-0.02331
664.864	0.00648	0.12929	0.3712	-0.02331
665.058	0.00635	0.12879	0.37164	-0.0233
665.252	0.00623	0.1283	0.37209	-0.0233
665.446	0.0061	0.12781	0.37254	-0.02329
665.641	0.00598	0.12731	0.37299	-0.02329
665.835	0.00586	0.12682	0.37344	-0.02328
666.029	0.00573	0.12632	0.37389	-0.02327
666.223	0.00561	0.12583	0.37434	-0.02327
666.417	0.00548	0.12533	0.37479	-0.02326
666.611	0.00536	0.12484	0.37524	-0.02326
666.805	0.00524	0.12434	0.37569	-0.02325
666.999	0.00511	0.12385	0.37614	-0.02325
667.193	0.00499	0.12335	0.37659	-0.02324
667.387	0.00487	0.12285	0.37704	-0.02324
667.581	0.00475	0.12235	0.37749	-0.02323
667.775	0.00463	0.12186	0.37794	-0.02323
667.969	0.00451	0.12136	0.37839	-0.02323
668.163	0.00439	0.12086	0.37884	-0.02322
668.357	0.00428	0.12037	0.37929	-0.02322
668.551	0.00416	0.11987	0.37974	-0.02322
668.745	0.00404	0.11937	0.38019	-0.02322
668.939	0.00393	0.11888	0.38065	-0.02322
669.133	0.00382	0.11838	0.3811	-0.02322
669.327	0.0037	0.11789	0.38155	-0.02322
669.521	0.00359	0.11739	0.382	-0.02322
669.715	0.00349	0.1169	0.38245	-0.02322
669.908	0.00338	0.11641	0.3829	-0.02322
670.102	0.00327	0.11592	0.38336	-0.02322
670.296	0.00317	0.11543	0.38381	-0.02322
670.49	0.00307	0.11494	0.38426	-0.02322
670.683	0.00297	0.11445	0.38472	-0.02322
670.877	0.00287	0.11396	0.38518	-0.02322
671.071	0.00277	0.11348	0.38563	-0.02321
671.265	0.00268	0.113	0.38609	-0.02321
671.458	0.00259	0.11251	0.38655	-0.02321
671.652	0.00249	0.11203	0.38701	-0.02321
671.846	0.00241	0.11155	0.38747	-0.02321
672.039	0.00232	0.11108	0.38793	-0.02321
672.233	0.00224	0.1106	0.38839	-0.02321
672.426	0.00216	0.11013	0.38886	-0.02321
672.62	0.00208	0.10966	0.38932	-0.02321
672.814	0.002	0.10919	0.38979	-0.0232
673.007	0.00192	0.10872	0.39026	-0.0232
673.201	0.00185	0.10825	0.39072	-0.0232
673.394	0.00178	0.10779	0.39119	-0.0232
673.588	0.00171	0.10733	0.39166	-0.0232
673.781	0.00164	0.10686	0.39213	-0.0232
673.975	0.00158	0.1064	0.3926	-0.0232
674.168	0.00151	0.10595	0.39308	-0.0232
674.361	0.00145	0.10549	0.39355	-0.0232
674.555	0.00139	0.10503	0.39402	-0.02321
674.748	0.00133	0.10457	0.39449	-0.02321
674.942	0.00127	0.10412	0.39497	-0.02321
675.135	0.00121	0.10366	0.39544	-0.02322
675.328	0.00115	0.10321	0.39591	-0.02322
675.522	0.0011	0.10276	0.39638	-0.02323
675.715	0.00104	0.1023	0.39685	-0.02324
675.908	0.000986074	0.10185	0.39732	-0.02325
676.102	0.000932191	0.1014	0.3978	-0.02326
676.295	0.00087908	0.10095	0.39827	-0.02327
676.488	0.000826759	0.1005	0.39874	-0.02329
676.681	0.000775148	0.10005	0.39921	-0.0233
676.874	0.000724151	0.0996	0.39968	-0.02332
677.068	0.000673682	0.09915	0.40015	-0.02333
677.261	0.000623576	0.0987	0.40062	-0.02335
677.454	0.000573708	0.09825	0.4011	-0.02337
677.647	0.000524047	0.0978	0.40157	-0.02339
677.84	0.000474639	0.09735	0.40204	-0.02342
678.033	0.000425441	0.0969	0.40251	-0.02344
678.226	0.000376311	0.09645	0.40298	-0.02346
678.42	0.000327116	0.096	0.40345	-0.02348
678.613	0.000277744	0.09555	0.40392	-0.02351
678.806	0.000228185	0.0951	0.4044	-0.02354
678.999	0.000178571	0.09465	0.40487	-0.02356
679.192	0.000128958	0.0942	0.40534	-0.02359
679.385	7.93228e-05	0.09375	0.40582	-0.02362
679.578	2.97364e-05	0.0933	0.40629	-0.02364
679.771	-1.97479e-05	0.09284	0.40677	-0.02367
679.964	-6.91196e-05	0.09239	0.40724	-0.0237
680.156	-0.00011832	0.09194	0.40772	-0.02373
680.349	-0.000167187	0.09149	0.4082	-0.02376
680.542	-0.00021549	0.09104	0.40867	-0.02379
680.735	-0.000263077	0.09059	0.40915	-0.02382
680.928	-0.000310014	0.09014	0.40963	-0.02385
681.121	-0.000356412	0.08969	0.41011	-0.02387
681.314	-0.000402182	0.08924	0.4106	-0.0239
681.506	-0.000447204	0.0888	0.41108	-0.02393
681.699	-0.000491495	0.08835	0.41156	-0.02395
681.892	-0.000534981	0.0879	0.41205	-0.02398
682.085	-0.000577371	0.08746	0.41254	-0.02401
682.278	-0.000618454	0.08701	0.41302	-0.02403
682.47	-0.000658215	0.08657	0.41351	-0.02406
682.663	-0.00069666	0.08613	0.414	-0.02408
682.856	-0.00073382	0.08569	0.4145	-0.0241
683.048	-0.000769687	0.08525	0.41499	-0.02412
683.241	-0.00080415	0.08481	0.41548	-0.02414
683.434	-0.000837239	0.08438	0.41598	-0.02416
683.626	-0.000869028	0.08394	0.41648	-0.02418
683.819	-0.000899474	0.08351	0.41698	-0.0242
684.011	-0.000928478	0.08308	0.41749	-0.02421
684.204	-0.000955993	0.08265	0.41799	-0.02423
684.397	-0.00098205	0.08222	0.4185	-0.02424
684.589	-0.00101	0.08179	0.41901	-0.02425
684.782	-0.00103	0.08137	0.41952	-0.02426
684.974	-0.00105	0.08094	0.42004	-0.02426
685.167	-0.00107	0.08052	0.42055	-0.02427
685.359	-0.00109	0.0801	0.42107	-0.02427
685.552	-0.00111	0.07968	0.42159	-0.02428
685.744	-0.00112	0.07926	0.42212	-0.02428
685.936	-0.00114	0.07884	0.42265	-0.02427
686.129	-0.00115	0.07843	0.42318	-0.02427
686.321	-0.00117	0.07801	0.42371	-0.02426
686.514	-0.00118	0.0776	0.42424	-0.02425
686.706	-0.00119	0.07718	0.42478	-0.02424
686.898	-0.0012	0.07677	0.42532	-0.02423
687.091	-0.0012	0.07636	0.42587	-0.02421
687.283	-0.00121	0.07595	0.42642	-0.02419
687.475	-0.00122	0.07554	0.42697	-0.02417
687.667	-0.00122	0.07513	0.42752	-0.02414
687.86	-0.00123	0.07473	0.42807	-0.02412
688.052	-0.00123	0.07432	0.42863	-0.02409
688.244	-0.00124	0.07391	0.42919	-0.02406
688.436	-0.00124	0.07351	0.42975	-0.02403
688.628	-0.00124	0.0731	0.43031	-0.024
688.821	-0.00125	0.0727	0.43088	-0.02397
689.013	-0.00125	0.07229	0.43144	-0.02393
689.205	-0.00125	0.07189	0.43201	-0.0239
689.397	-0.00125	0.07148	0.43258	-0.02386
689.589	-0.00126	0.07108	0.43315	-0.02382
689.781	-0.00126	0.07068	0.43372	-0.02379
689.973	-0.00126	0.07027	0.43429	-0.02375
690.165	-0.00126	0.06987	0.43486	-0.02371
690.357	-0.00126	0.06947	0.43544	-0.02367
690.549	-0.00126	0.06907	0.43601	-0.02363
690.741	-0.00127	0.06866	0.43658	-0.0236
690.933	-0.00127	0.06826	0.43716	-0.02356
691.125	-0.00127	0.06786	0.43773	-0.02352
691.317	-0.00127	0.06746	0.4383	-0.02349
691.509	-0.00128	0.06705	0.43888	-0.02345
691.701	-0.00128	0.06665	0.43945	-0.02342
691.893	-0.00128	0.06625	0.44002	-0.02339
692.085	-0.00129	0.06584	0.44059	-0.02336
692.277	-0.00129	0.06544	0.44116	-0.02333
692.469	-0.00129	0.06504	0.44172	-0.0233
692.66	-0.0013	0.06464	0.44229	-0.02327
692.852	-0.0013	0.06423	0.44286	-0.02325
693.044	-0.00131	0.06383	0.44342	-0.02323
693.236	-0.00131	0.06343	0.44398	-0.02321
693.428	-0.00132	0.06302	0.44454	-0.02319
693.619	-0.00132	0.06262	0.4451	-0.02317
693.811	-0.00133	0.06222	0.44566	-0.02316
694.003	-0.00133	0.06182	0.44622	-0.02314
694.194	-0.00133	0.06142	0.44677	-0.02313
694.386	-0.00134	0.06102	0.44733	-0.02312
694.578	-0.00134	0.06062	0.44789	-0.02311
694.769	-0.00134	0.06023	0.44844	-0.0231
694.961	-0.00135	0.05983	0.44899	-0.0231
695.153	-0.00135	0.05943	0.44955	-0.02309
695.344	-0.00135	0.05904	0.4501	-0.02309
695.536	-0.00135	0.05864	0.45065	-0.02309
695.727	-0.00135	0.05825	0.45119	-0.02309
695.919	-0.00135	0.05786	0.45174	-0.02309
696.111	-0.00135	0.05746	0.45228	-0.02309
696.302	-0.00135	0.05707	0.45283	-0.0231
696.494	-0.00135	0.05668	0.45337	-0.0231
696.685	-0.00135	0.05629	0.45391	-0.02311
696.876	-0.00135	0.05591	0.45445	-0.02311
697.068	-0.00135	0.05552	0.45499	-0.02312
697.259	-0.00134	0.05514	0.45553	-0.02313
697.451	-0.00134	0.05475	0.45606	-0.02314
697.642	-0.00133	0.05437	0.4566	-0.02315
697.834	-0.00133	0.05399	0.45714	-0.02316
698.025	-0.00132	0.05361	0.45767	-0.02317
698.216	-0.00131	0.05323	0.45821	-0.02319
698.408	-0.0013	0.05286	0.45874	-0.0232
698.599	-0.00128	0.05248	0.45928	-0.02321
698.79	-0.00127	0.05211	0.45981	-0.02322
698.981	-0.00125	0.05174	0.46034	-0.02324
699.173	-0.00124	0.05137	0.46088	-0.02325
699.364	-0.00122	0.05101	0.46141	-0.02327
699.555	-0.0012	0.05065	0.46194	-0.02328
699.746	-0.00117	0.05028	0.46248	-0.02329
699.938	-0.00115	0.04992	0.46301	-0.02331
700.129	-0.00113	0.04956	0.46354	-0.02332
700.32	-0.0011	0.04921	0.46408	-0.02334
700.511	-0.00107	0.04885	0.46461	-0.02335
700.702	-0.00105	0.0485	0.46515	-0.02336
700.893	-0.00102	0.04815	0.46568	-0.02338
701.084	-0.00098499	0.0478	0.46622	-0.02339
701.275	-0.000953339	0.04745	0.46676	-0.0234
701.466	-0.000920837	0.0471	0.4673	-0.02341
701.658	-0.000887539	0.04675	0.46783	-0.02342
701.849	-0.000853454	0.04641	0.46838	-0.02343
702.04	-0.000818558	0.04606	0.46892	-0.02344
702.231	-0.00078293	0.04572	0.46946	-0.02345
702.422	-0.000746746	0.04538	0.47001	-0.02346
702.612	-0.000710071	0.04504	0.47055	-0.02346
702.803	-0.000672876	0.0447	0.4711	-0.02347
702.994	-0.000635251	0.04436	0.47165	-0.02347
703.185	-0.000597352	0.04402	0.4722	-0.02347
703.376	-0.000559219	0.04368	0.47275	-0.02348
703.567	-0.000520747	0.04334	0.4733	-0.02348
703.758	-0.000481876	0.043	0.47386	-0.02348
703.949	-0.000442656	0.04267	0.47442	-0.02348
704.14	-0.000403189	0.04233	0.47498	-0.02347
704.33	-0.000363531	0.042	0.47554	-0.02347
704.521	-0.000323661	0.04166	0.4761	-0.02347
704.712	-0.000283594	0.04133	0.47666	-0.02347
704.903	-0.000243394	0.04099	0.47722	-0.02346
705.093	-0.000202982	0.04066	0.47778	-0.02346
705.284	-0.000162279	0.04033	0.47835	-0.02346
705.475	-0.000121304	0.04	0.47891	-0.02346
705.665	-8.0068e-05	0.03967	0.47947	-0.02345
705.856	-3.86157e-05	0.03934	0.48004	-0.02345
706.047	3.12502e-06	0.03901	0.4806	-0.02345
706.237	4.5178e-05	0.03868	0.48117	-0.02345
706.428	8.75774e-05	0.03835	0.48173	-0.02345
706.619	0.000130476	0.03802	0.48229	-0.02346
706.809	0.000174003	0.0377	0.48285	-0.02346
707	0.000218242	0.03737	0.48342	-0.02346
707.19	0.000263228	0.03705	0.48398	-0.02347
707.381	0.000308954	0.03672	0.48454	-0.02347
707.571	0.000355429	0.0364	0.4851	-0.02348
707.762	0.000402688	0.03608	0.48566	-0.02349
707.952	0.000450716	0.03576	0.48622	-0.0235
708.143	0.000499488	0.03545	0.48678	-0.02351
708.333	0.000548993	0.03513	0.48733	-0.02351
708.524	0.000599243	0.03482	0.48789	-0.02352
708.714	0.000650223	0.0345	0.48845	-0.02354
708.905	0.000701965	0.03419	0.48901	-0.02355
709.095	0.000754526	0.03388	0.48956	-0.02356
709.285	0.000807934	0.03357	0.49012	-0.02357
709.476	0.000862207	0.03326	0.49067	-0.02358
709.666	0.000917335	0.03296	0.49123	-0.0236
709.856	0.000973376	0.03265	0.49178	-0.02361
710.047	0.00103	0.03235	0.49234	-0.02363
710.237	0.00109	0.03205	0.49289	-0.02364
710.427	0.00115	0.03175	0.49344	-0.02366
710.617	0.00121	0.03145	0.494	-0.02367
710.808	0.00127	0.03115	0.49455	-0.02368
710.998	0.00133	0.03086	0.4951	-0.0237
711.188	0.0014	0.03057	0.49565	-0.02371
711.378	0.00146	0.03028	0.4962	-0.02373
711.568	0.00153	0.02999	0.49675	-0.02374
711.759	0.00159	0.0297	0.4973	-0.02376
711.949	0.00166	0.02942	0.49785	-0.02377
712.139	0.00173	0.02914	0.4984	-0.02379
712.329	0.0018	0.02885	0.49894	-0.0238
712.519	0.00187	0.02857	0.49949	-0.02382
712.709	0.00194	0.0283	0.50003	-0.02383
712.899	0.00201	0.02802	0.50058	-0.02385
713.089	0.00208	0.02774	0.50112	-0.02386
713.279	0.00216	0.02747	0.50166	-0.02388
713.469	0.00223	0.02719	0.5022	-0.02389
713.659	0.0023	0.02692	0.50274	-0.02391
713.849	0.00237	0.02665	0.50328	-0.02392
714.039	0.00245	0.02638	0.50381	-0.02394
714.229	0.00252	0.0261	0.50435	-0.02396
714.419	0.00259	0.02583	0.50488	-0.02397
714.609	0.00267	0.02557	0.50541	-0.02399
714.799	0.00274	0.0253	0.50594	-0.024
714.989	0.00282	0.02503	0.50647	-0.02402
715.178	0.00289	0.02476	0.507	-0.02403
715.368	0.00297	0.0245	0.50753	-0.02404
715.558	0.00304	0.02423	0.50806	-0.02405
715.748	0.00312	0.02397	0.50859	-0.02407
715.938	0.00319	0.0237	0.50912	-0.02408
716.127	0.00327	0.02344	0.50965	-0.02408
716.317	0.00334	0.02318	0.51018	-0.02409
716.507	0.00342	0.02292	0.5107	-0.0241
716.697	0.00349	0.02266	0.51123	-0.02411
716.886	0.00357	0.0224	0.51176	-0.02411
717.076	0.00364	0.02214	0.51229	-0.02411
717.266	0.00372	0.02188	0.51281	-0.02412
717.455	0.00379	0.02162	0.51334	-0.02411
717.645	0.00387	0.02136	0.51387	-0.02411
717.834	0.00394	0.0211	0.5144	-0.02411
718.024	0.00402	0.02084	0.51493	-0.0241
718.214	0.00409	0.02058	0.51546	-0.0241
718.403	0.00417	0.02033	0.51599	-0.02409
718.593	0.00424	0.02007	0.51652	-0.02408
718.782	0.00432	0.01981	0.51704	-0.02407
718.972	0.00439	0.01956	0.51757	-0.02406
719.161	0.00447	0.0193	0.5181	-0.02405
719.351	0.00455	0.01905	0.51863	-0.02404
719.54	0.00462	0.01879	0.51915	-0.02403
719.73	0.0047	0.01854	0.51968	-0.02401
719.919	0.00477	0.01828	0.52021	-0.024
720.109	0.00485	0.01803	0.52073	-0.02398
720.298	0.00493	0.01778	0.52126	-0.02396
720.487	0.00501	0.01753	0.52178	-0.02395
720.677	0.00508	0.01728	0.5223	-0.02393
720.866	0.00516	0.01703	0.52282	-0.02392
721.055	0.00524	0.01678	0.52334	-0.0239
721.245	0.00532	0.01653	0.52386	-0.02389
721.434	0.0054	0.01628	0.52438	-0.02387
721.623	0.00548	0.01604	0.52489	-0.02386
721.812	0.00556	0.01579	0.5254	-0.02384
722.002	0.00564	0.01555	0.52592	-0.02383
722.191	0.00572	0.01531	0.52642	-0.02382
722.38	0.00581	0.01507	0.52693	-0.02381
722.569	0.00589	0.01483	0.52743	-0.0238
722.758	0.00598	0.01459	0.52793	-0.02379
722.948	0.00606	0.01435	0.52843	-0.02378
723.137	0.00615	0.01411	0.52893	-0.02377
723.326	0.00624	0.01388	0.52942	-0.02376
723.515	0.00633	0.01365	0.52992	-0.02376
723.704	0.00642	0.01341	0.5304	-0.02375
723.893	0.00651	0.01318	0.53089	-0.02375
724.082	0.0066	0.01295	0.53137	-0.02375
724.271	0.00669	0.01273	0.53185	-0.02375
724.46	0.00678	0.0125	0.53233	-0.02375
724.649	0.00687	0.01227	0.53281	-0.02375
724.838	0.00696	0.01205	0.53328	-0.02376
725.027	0.00705	0.01182	0.53375	-0.02376
725.216	0.00715	0.0116	0.53421	-0.02377
725.405	0.00724	0.01138	0.53468	-0.02377
725.594	0.00733	0.01116	0.53514	-0.02378
725.783	0.00743	0.01094	0.5356	-0.02379
725.972	0.00752	0.01072	0.53605	-0.0238
726.161	0.00762	0.0105	0.53651	-0.0238
726.35	0.00771	0.01028	0.53696	-0.02381
726.538	0.00781	0.01007	0.53741	-0.02382
726.727	0.0079	0.00985	0.53786	-0.02384
726.916	0.008	0.00964	0.5383	-0.02385
727.105	0.0081	0.00943	0.53875	-0.02386
727.294	0.0082	0.00922	0.53919	-0.02387
727.482	0.00829	0.00901	0.53963	-0.02388
727.671	0.00839	0.0088	0.54007	-0.0239
727.86	0.00849	0.00859	0.5405	-0.02391
728.049	0.00859	0.00839	0.54094	-0.02392
728.237	0.00869	0.00818	0.54137	-0.02394
728.426	0.00879	0.00798	0.5418	-0.02395
728.615	0.0089	0.00778	0.54223	-0.02396
728.803	0.009	0.00758	0.54266	-0.02397
728.992	0.0091	0.00738	0.54308	-0.02399
729.18	0.0092	0.00718	0.54351	-0.024
729.369	0.0093	0.00699	0.54393	-0.024
729.558	0.00941	0.00679	0.54436	-0.02401
729.746	0.00951	0.0066	0.54478	-0.02402
729.935	0.00961	0.0064	0.5452	-0.02402
730.123	0.00972	0.00621	0.54562	-0.02403
730.312	0.00982	0.00602	0.54604	-0.02403
730.5	0.00992	0.00583	0.54646	-0.02403
730.689	0.01003	0.00564	0.54688	-0.02403
730.877	0.01013	0.00545	0.5473	-0.02403
731.065	0.01024	0.00526	0.54772	-0.02402
731.254	0.01035	0.00508	0.54814	-0.02401
731.442	0.01045	0.00489	0.54856	-0.024
731.631	0.01056	0.00471	0.54898	-0.02399
731.819	0.01067	0.00452	0.5494	-0.02398
732.007	0.01078	0.00434	0.54982	-0.02397
732.196	0.01089	0.00416	0.55024	-0.02395
732.384	0.011	0.00398	0.55066	-0.02393
732.572	0.01111	0.00381	0.55108	-0.02391
732.761	0.01122	0.00363	0.5515	-0.02389
732.949	0.01133	0.00346	0.55192	-0.02387
733.137	0.01145	0.00328	0.55234	-0.02385
733.325	0.01156	0.00311	0.55276	-0.02383
733.514	0.01168	0.00294	0.55318	-0.0238
733.702	0.01179	0.00277	0.5536	-0.02378
733.89	0.01191	0.0026	0.55402	-0.02375
734.078	0.01203	0.00244	0.55443	-0.02373
734.266	0.01215	0.00227	0.55485	-0.0237
734.454	0.01227	0.00211	0.55526	-0.02367
734.643	0.01239	0.00194	0.55568	-0.02365
734.831	0.01251	0.00178	0.55609	-0.02362
735.019	0.01263	0.00162	0.55649	-0.02359
735.207	0.01275	0.00146	0.5569	-0.02357
735.395	0.01288	0.0013	0.5573	-0.02355
735.583	0.013	0.00114	0.5577	-0.02353
735.771	0.01313	0.000979181	0.5581	-0.02351
735.959	0.01325	0.00082158	0.55849	-0.02349
736.147	0.01338	0.000664772	0.55888	-0.02347
736.335	0.0135	0.00050887	0.55926	-0.02346
736.523	0.01363	0.000353915	0.55964	-0.02344
736.711	0.01376	0.000199782	0.56002	-0.02344
736.899	0.01389	4.62276e-05	0.56039	-0.02343
737.086	0.01402	-0.00010695	0.56076	-0.02342
737.274	0.01415	-0.000259804	0.56113	-0.02342
737.462	0.01428	-0.000412325	0.56149	-0.02342
737.65	0.01441	-0.000564476	0.56184	-0.02342
737.838	0.01454	-0.000716202	0.5622	-0.02342
738.026	0.01467	-0.000867586	0.56255	-0.02343
738.213	0.0148	-0.00102	0.56289	-0.02344
738.401	0.01493	-0.00117	0.56323	-0.02345
738.589	0.01506	-0.00132	0.56357	-0.02346
738.777	0.01519	-0.00147	0.5639	-0.02347
738.965	0.01532	-0.00162	0.56423	-0.02348
739.152	0.01545	-0.00177	0.56456	-0.0235
739.34	0.01558	-0.00192	0.56488	-0.02351
739.528	0.01571	-0.00207	0.56519	-0.02353
739.715	0.01584	-0.00222	0.56551	-0.02355
739.903	0.01597	-0.00237	0.56582	-0.02357
740.091	0.01609	-0.00252	0.56613	-0.02359
740.278	0.01622	-0.00267	0.56643	-0.02361
740.466	0.01635	-0.00282	0.56673	-0.02363
740.653	0.01648	-0.00297	0.56703	-0.02365
740.841	0.0166	-0.00312	0.56732	-0.02367
741.028	0.01673	-0.00326	0.56761	-0.02369
741.216	0.01686	-0.00341	0.5679	-0.02371
741.403	0.01699	-0.00356	0.56819	-0.02373
741.591	0.01711	-0.0037	0.56847	-0.02375
741.778	0.01724	-0.00385	0.56875	-0.02377
741.966	0.01737	-0.00399	0.56903	-0.02379
742.153	0.0175	-0.00413	0.56931	-0.02381
742.341	0.01763	-0.00428	0.56958	-0.02383
742.528	0.01775	-0.00442	0.56986	-0.02385
742.716	0.01788	-0.00456	0.57013	-0.02387
742.903	0.01801	-0.0047	0.5704	-0.02389
743.09	0.01814	-0.00484	0.57067	-0.02391
743.278	0.01827	-0.00498	0.57094	-0.02392
743.465	0.0184	-0.00511	0.57121	-0.02394
743.652	0.01853	-0.00525	0.57147	-0.02395
743.84	0.01866	-0.00538	0.57174	-0.02396
744.027	0.01879	-0.00552	0.57201	-0.02397
744.214	0.01892	-0.00565	0.57228	-0.02398
744.401	0.01905	-0.00578	0.57255	-0.02398
744.589	0.01918	-0.00591	0.57282	-0.02398
744.776	0.01931	-0.00604	0.57308	-0.02399
744.963	0.01943	-0.00617	0.57335	-0.02399
745.15	0.01956	-0.0063	0.57362	-0.02398
745.337	0.01969	-0.00643	0.57388	-0.02398
745.524	0.01982	-0.00655	0.57415	-0.02397
745.711	0.01995	-0.00668	0.57442	-0.02396
745.899	0.02008	-0.00681	0.57468	-0.02395
746.086	0.02021	-0.00693	0.57495	-0.02394
746.273	0.02034	-0.00706	0.57521	-0.02393
746.46	0.02046	-0.00718	0.57548	-0.02391
746.647	0.02059	-0.00731	0.57574	-0.0239
746.834	0.02072	-0.00743	0.57601	-0.02388
747.021	0.02084	-0.00756	0.57627	-0.02386
747.208	0.02096	-0.00768	0.57653	-0.02384
747.395	0.02109	-0.00781	0.57679	-0.02382
747.582	0.02121	-0.00793	0.57705	-0.02379
747.769	0.02133	-0.00805	0.57731	-0.02377
747.956	0.02146	-0.00818	0.57756	-0.02374
748.143	0.02158	-0.0083	0.57782	-0.02372
748.329	0.0217	-0.00842	0.57807	-0.02369
748.516	0.02183	-0.00854	0.57832	-0.02367
748.703	0.02195	-0.00866	0.57857	-0.02364
748.89	0.02207	-0.00878	0.57882	-0.02362
749.077	0.02219	-0.0089	0.57906	-0.02359
749.264	0.02232	-0.00902	0.5793	-0.02356
749.45	0.02244	-0.00914	0.57954	-0.02354
749.637	0.02256	-0.00926	0.57978	-0.02352
749.824	0.02268	-0.00938	0.58001	-0.0235
750.011	0.02281	-0.0095	0.58024	-0.02348
750.197	0.02293	-0.00962	0.58046	-0.02346
750.384	0.02305	-0.00973	0.58068	-0.02344
750.571	0.02318	-0.00985	0.5809	-0.02342
750.757	0.0233	-0.00997	0.58112	-0.0234
750.944	0.02342	-0.01008	0.58133	-0.02339
751.131	0.02354	-0.0102	0.58153	-0.02337
751.317	0.02367	-0.01031	0.58174	-0.02336
751.504	0.02379	-0.01042	0.58194	-0.02334
751.691	0.02392	-0.01054	0.58213	-0.02333
751.877	0.02404	-0.01065	0.58232	-0.02332
752.064	0.02417	-0.01076	0.58251	-0.02331
752.25	0.0243	-0.01087	0.58269	-0.0233
752.437	0.02443	-0.01098	0.58287	-0.02329
752.623	0.02455	-0.01108	0.58304	-0.02328
752.81	0.02468	-0.01119	0.58321	-0.02328
752.996	0.02481	-0.0113	0.58337	-0.02328
753.183	0.02494	-0.0114	0.58352	-0.02328
753.369	0.02508	-0.01151	0.58367	-0.02328
753.555	0.02521	-0.01161	0.58382	-0.02328
753.742	0.02534	-0.01171	0.58395	-0.02329
753.928	0.02548	-0.01181	0.58409	-0.02329
754.115	0.02561	-0.01191	0.58422	-0.0233
754.301	0.02575	-0.01201	0.58434	-0.02331
754.487	0.02588	-0.01211	0.58446	-0.02331
754.674	0.02602	-0.01221	0.58458	-0.02332
754.86	0.02616	-0.0123	0.58469	-0.02333
755.046	0.0263	-0.0124	0.58479	-0.02334
755.232	0.02644	-0.01249	0.5849	-0.02335
755.419	0.02658	-0.01258	0.58499	-0.02336
755.605	0.02672	-0.01267	0.58509	-0.02337
755.791	0.02687	-0.01276	0.58518	-0.02338
755.977	0.02701	-0.01285	0.58526	-0.02339
756.164	0.02715	-0.01294	0.58534	-0.0234
756.35	0.0273	-0.01303	0.58542	-0.02341
756.536	0.02744	-0.01311	0.58549	-0.02342
756.722	0.02759	-0.0132	0.58556	-0.02344
756.908	0.02774	-0.01328	0.58562	-0.02345
757.094	0.02788	-0.01337	0.58568	-0.02346
757.28	0.02803	-0.01345	0.58574	-0.02347
757.466	0.02818	-0.01353	0.58579	-0.02348
757.652	0.02833	-0.01361	0.58584	-0.02349
757.838	0.02848	-0.01369	0.58589	-0.0235
758.024	0.02863	-0.01377	0.58593	-0.02351
758.21	0.02878	-0.01385	0.58597	-0.02352
758.396	0.02893	-0.01393	0.586	-0.02352
758.582	0.02908	-0.01401	0.58604	-0.02353
758.768	0.02924	-0.01408	0.58607	-0.02354
758.954	0.02939	-0.01416	0.58609	-0.02355
759.14	0.02954	-0.01423	0.58612	-0.02356
759.326	0.0297	-0.01431	0.58613	-0.02357
759.512	0.02985	-0.01439	0.58615	-0.02358
759.698	0.03001	-0.01446	0.58616	-0.02359
759.884	0.03016	-0.01454	0.58617	-0.0236
760.069	0.03032	-0.01461	0.58618	-0.02361
760.255	0.03047	-0.01469	0.58618	-0.02362
760.441	0.03062	-0.01476	0.58619	-0.02363
760.627	0.03078	-0.01484	0.58618	-0.02364
760.813	0.03093	-0.01491	0.58618	-0.02365
760.998	0.03108	-0.01499	0.58617	-0.02365
761.184	0.03124	-0.01506	0.58616	-0.02366
761.37	0.03139	-0.01513	0.58615	-0.02367
761.555	0.03155	-0.01521	0.58613	-0.02368
761.741	0.0317	-0.01528	0.58611	-0.02368
761.927	0.03185	-0.01535	0.58609	-0.02369
762.112	0.03201	-0.01543	0.58607	-0.02369
762.298	0.03216	-0.0155	0.58604	-0.0237
762.484	0.03232	-0.01557	0.58601	-0.0237
762.669	0.03247	-0.01564	0.58597	-0.02371
762.855	0.03263	-0.01571	0.58594	-0.02371
763.04	0.03278	-0.01578	0.5859	-0.02372
763.226	0.03294	-0.01585	0.58585	-0.02373
763.411	0.0331	-0.01592	0.58581	-0.02373
763.597	0.03325	-0.01599	0.58576	-0.02374
763.782	0.03341	-0.01606	0.58571	-0.02375
763.968	0.03356	-0.01613	0.58566	-0.02375
764.153	0.03372	-0.0162	0.5856	-0.02376
764.339	0.03388	-0.01626	0.58555	-0.02376
764.524	0.03403	-0.01633	0.58549	-0.02377
764.71	0.03419	-0.0164	0.58543	-0.02377
764.895	0.03434	-0.01647	0.58537	-0.02377
765.08	0.0345	-0.01653	0.58531	-0.02377
765.266	0.03466	-0.0166	0.58524	-0.02378
765.451	0.03481	-0.01666	0.58518	-0.02378
765.636	0.03497	-0.01673	0.58511	-0.02378
765.822	0.03513	-0.0168	0.58504	-0.02378
766.007	0.03528	-0.01686	0.58497	-0.02378
766.192	0.03544	-0.01693	0.5849	-0.02377
766.378	0.0356	-0.01699	0.58483	-0.02377
766.563	0.03575	-0.01706	0.58476	-0.02377
766.748	0.03591	-0.01712	0.58468	-0.02376
766.933	0.03606	-0.01719	0.58461	-0.02376
767.118	0.03622	-0.01725	0.58453	-0.02375
767.304	0.03637	-0.01732	0.58445	-0.02375
767.489	0.03653	-0.01739	0.58437	-0.02374
767.674	0.03668	-0.01745	0.58429	-0.02373
767.859	0.03683	-0.01752	0.5842	-0.02372
768.044	0.03699	-0.01759	0.58411	-0.02371
768.229	0.03714	-0.01766	0.58403	-0.0237
768.414	0.03729	-0.01772	0.58394	-0.02368
768.599	0.03744	-0.01779	0.58385	-0.02367
768.784	0.03758	-0.01786	0.58375	-0.02365
768.969	0.03773	-0.01793	0.58365	-0.02364
769.154	0.03787	-0.018	0.58356	-0.02362
769.339	0.03802	-0.01808	0.58345	-0.02361
769.524	0.03816	-0.01815	0.58335	-0.02359
769.709	0.0383	-0.01822	0.58324	-0.02357
769.894	0.03844	-0.0183	0.58313	-0.02355
770.079	0.03858	-0.01837	0.58302	-0.02353
770.264	0.03872	-0.01845	0.58291	-0.02351
770.449	0.03885	-0.01853	0.58279	-0.02349
770.634	0.03899	-0.01861	0.58267	-0.02347
770.819	0.03912	-0.01869	0.58255	-0.02345
771.003	0.03925	-0.01877	0.58242	-0.02343
771.188	0.03938	-0.01885	0.5823	-0.0234
771.373	0.03951	-0.01893	0.58217	-0.02338
771.558	0.03963	-0.01901	0.58204	-0.02335
771.743	0.03976	-0.0191	0.5819	-0.02333
771.927	0.03988	-0.01918	0.58177	-0.0233
772.112	0.04001	-0.01926	0.58163	-0.02328
772.297	0.04013	-0.01935	0.58149	-0.02325
772.482	0.04025	-0.01944	0.58134	-0.02322
772.666	0.04036	-0.01952	0.5812	-0.0232
772.851	0.04048	-0.01961	0.58105	-0.02317
773.036	0.0406	-0.0197	0.58089	-0.02315
773.22	0.04071	-0.01978	0.58073	-0.02312
773.405	0.04082	-0.01987	0.58057	-0.0231
773.589	0.04093	-0.01996	0.58041	-0.02307
773.774	0.04104	-0.02005	0.58024	-0.02305
773.959	0.04115	-0.02014	0.58006	-0.02303
774.143	0.04126	-0.02023	0.57989	-0.02301
774.328	0.04136	-0.02032	0.5797	-0.02299
774.512	0.04146	-0.02041	0.57952	-0.02297
774.697	0.04157	-0.0205	0.57933	-0.02295
774.881	0.04167	-0.02059	0.57914	-0.02294
775.066	0.04177	-0.02068	0.57894	-0.02292
775.25	0.04187	-0.02077	0.57874	-0.02291
775.434	0.04196	-0.02086	0.57854	-0.0229
775.619	0.04206	-0.02095	0.57833	-0.02288
775.803	0.04216	-0.02104	0.57812	-0.02287
775.988	0.04225	-0.02113	0.57791	-0.02286
776.172	0.04235	-0.02121	0.57769	-0.02285
776.356	0.04244	-0.0213	0.57746	-0.02285
776.541	0.04253	-0.02139	0.57724	-0.02284
776.725	0.04262	-0.02147	0.57701	-0.02284
776.909	0.04272	-0.02155	0.57677	-0.02283
777.094	0.04281	-0.02164	0.57653	-0.02283
777.278	0.0429	-0.02172	0.57629	-0.02283
777.462	0.04299	-0.0218	0.57604	-0.02283
777.646	0.04308	-0.02187	0.57579	-0.02283
777.831	0.04317	-0.02195	0.57554	-0.02283
778.015	0.04326	-0.02203	0.57528	-0.02283
778.199	0.04334	-0.0221	0.57502	-0.02284
778.383	0.04343	-0.02217	0.57476	-0.02284
778.567	0.04352	-0.02224	0.57449	-0.02285
778.751	0.04361	-0.02231	0.57422	-0.02285
778.935	0.04369	-0.02238	0.57395	-0.02285
779.12	0.04378	-0.02245	0.57367	-0.02286
779.304	0.04387	-0.02252	0.5734	-0.02286
779.488	0.04395	-0.02258	0.57311	-0.02287
779.672	0.04404	-0.02265	0.57283	-0.02287
779.856	0.04412	-0.02271	0.57254	-0.02288
780.04	0.0442	-0.02278	0.57225	-0.02288
780.224	0.04429	-0.02284	0.57195	-0.02288
780.408	0.04437	-0.0229	0.57165	-0.02289
780.592	0.04445	-0.02297	0.57135	-0.02289
780.776	0.04454	-0.02303	0.57105	-0.02289
780.96	0.04462	-0.02309	0.57074	-0.02289
781.143	0.0447	-0.02315	0.57044	-0.02289
781.327	0.04478	-0.02321	0.57012	-0.02289
781.511	0.04486	-0.02327	0.56981	-0.02288
781.695	0.04494	-0.02333	0.56949	-0.02288
781.879	0.04502	-0.02339	0.56918	-0.02287
782.063	0.04511	-0.02345	0.56885	-0.02286
782.247	0.04519	-0.02351	0.56853	-0.02285
782.43	0.04527	-0.02357	0.5682	-0.02285
782.614	0.04535	-0.02363	0.56787	-0.02284
782.798	0.04543	-0.02368	0.56753	-0.02283
782.982	0.04551	-0.02374	0.56719	-0.02282
783.165	0.0456	-0.0238	0.56685	-0.0228
783.349	0.04568	-0.02385	0.5665	-0.02279
783.533	0.04577	-0.02391	0.56616	-0.02278
783.716	0.04585	-0.02397	0.5658	-0.02277
783.9	0.04593	-0.02402	0.56545	-0.02276
784.084	0.04602	-0.02408	0.56509	-0.02274
784.267	0.0461	-0.02413	0.56472	-0.02273
784.451	0.04619	-0.02419	0.56436	-0.02272
784.635	0.04628	-0.02424	0.56399	-0.0227
784.818	0.04637	-0.0243	0.56361	-0.02269
785.002	0.04645	-0.02435	0.56324	-0.02268
785.185	0.04654	-0.02441	0.56286	-0.02267
785.369	0.04663	-0.02446	0.56247	-0.02266
785.552	0.04672	-0.02452	0.56208	-0.02264
785.736	0.04681	-0.02457	0.56169	-0.02263
785.919	0.0469	-0.02463	0.5613	-0.02262
786.103	0.04699	-0.02468	0.5609	-0.02261
786.286	0.04709	-0.02474	0.5605	-0.02261
786.47	0.04718	-0.02479	0.56009	-0.0226
786.653	0.04728	-0.02485	0.55968	-0.02259
786.836	0.04738	-0.0249	0.55927	-0.02259
787.02	0.04747	-0.02496	0.55886	-0.02258
787.203	0.04757	-0.02501	0.55844	-0.02258
787.386	0.04767	-0.02506	0.55802	-0.02258
787.57	0.04778	-0.02511	0.55759	-0.02258
787.753	0.04788	-0.02517	0.55716	-0.02258
787.936	0.04799	-0.02522	0.55673	-0.02258
788.12	0.0481	-0.02527	0.5563	-0.02258
788.303	0.04821	-0.02532	0.55586	-0.02259
788.486	0.04832	-0.02537	0.55542	-0.02259
788.669	0.04843	-0.02541	0.55498	-0.0226
788.853	0.04855	-0.02546	0.55453	-0.0226
789.036	0.04866	-0.02551	0.55409	-0.02261
789.219	0.04878	-0.02555	0.55364	-0.02262
789.402	0.0489	-0.0256	0.55318	-0.02263
789.585	0.04902	-0.02564	0.55272	-0.02264
789.768	0.04915	-0.02568	0.55226	-0.02266
789.951	0.04927	-0.02572	0.5518	-0.02267
790.135	0.0494	-0.02576	0.55133	-0.02268
790.318	0.04952	-0.0258	0.55086	-0.0227
790.501	0.04965	-0.02584	0.55039	-0.02271
790.684	0.04978	-0.02588	0.54992	-0.02273
790.867	0.04991	-0.02592	0.54944	-0.02274
791.05	0.05005	-0.02595	0.54897	-0.02276
791.233	0.05018	-0.02599	0.54849	-0.02278
791.416	0.05031	-0.02602	0.548	-0.02279
791.599	0.05045	-0.02606	0.54752	-0.02281
791.782	0.05058	-0.02609	0.54703	-0.02282
791.964	0.05072	-0.02612	0.54655	-0.02283
792.147	0.05086	-0.02615	0.54606	-0.02285
792.33	0.051	-0.02619	0.54557	-0.02286
792.513	0.05113	-0.02622	0.54507	-0.02288
792.696	0.05127	-0.02625	0.54458	-0.02289
792.879	0.05141	-0.02628	0.54408	-0.0229
793.062	0.05155	-0.0263	0.54358	-0.02292
793.244	0.05169	-0.02633	0.54307	-0.02293
793.427	0.05183	-0.02636	0.54257	-0.02294
793.61	0.05197	-0.02639	0.54206	-0.02295
793.793	0.05211	-0.02641	0.54155	-0.02297
793.975	0.05225	-0.02644	0.54103	-0.02298
794.158	0.05239	-0.02646	0.54051	-0.02299
794.341	0.05253	-0.02649	0.53999	-0.023
794.524	0.05267	-0.02651	0.53947	-0.02301
794.706	0.05281	-0.02654	0.53895	-0.02302
794.889	0.05295	-0.02657	0.53842	-0.02302
795.071	0.05309	-0.02659	0.53789	-0.02303
795.254	0.05323	-0.02662	0.53736	-0.02304
795.437	0.05336	-0.02664	0.53682	-0.02304
795.619	0.0535	-0.02667	0.53629	-0.02305
795.802	0.05363	-0.02669	0.53575	-0.02305
795.984	0.05377	-0.02672	0.53521	-0.02305
796.167	0.0539	-0.02675	0.53466	-0.02305
796.349	0.05403	-0.02677	0.53412	-0.02305
796.532	0.05416	-0.0268	0.53357	-0.02305
796.714	0.05429	-0.02683	0.53302	-0.02305
796.897	0.05442	-0.02686	0.53247	-0.02305
797.079	0.05455	-0.02689	0.53192	-0.02304
797.262	0.05467	-0.02692	0.53136	-0.02304
797.444	0.0548	-0.02695	0.53081	-0.02303
797.627	0.05492	-0.02698	0.53025	-0.02302
797.809	0.05504	-0.02701	0.52969	-0.02302
797.991	0.05516	-0.02704	0.52913	-0.02301
[truncated: 575 more rows]

## Sheet: Figure 4
	State of Charge
λ / nm	1 (V(II))	0.9	0.8	0.7	0.6	0.5	0.4	0.3	0.2	0.1	0 (V(III))
400.082	0.02218	0.06273	0.10172	0.13678	0.1758	0.20521	0.23738	0.26675	0.29675	0.33214	0.34463
400.298	0.02186	0.06247	0.10148	0.13662	0.17572	0.20518	0.23738	0.26678	0.2969	0.33228	0.34485
400.513	0.02155	0.06223	0.10125	0.13647	0.17565	0.20516	0.2374	0.26682	0.29707	0.33244	0.34509
400.729	0.02125	0.06199	0.10103	0.13632	0.17559	0.20516	0.23743	0.26688	0.29724	0.3326	0.34535
400.945	0.02095	0.06175	0.10081	0.13619	0.17553	0.20515	0.23747	0.26693	0.29742	0.33278	0.34561
401.161	0.02066	0.06152	0.1006	0.13606	0.17547	0.20515	0.23751	0.26699	0.29761	0.33296	0.34588
401.377	0.02038	0.0613	0.1004	0.13593	0.17542	0.20515	0.23756	0.26706	0.29779	0.33314	0.34614
401.593	0.0201	0.06108	0.1002	0.13581	0.17536	0.20516	0.23762	0.26712	0.29798	0.33332	0.34641
401.809	0.01983	0.06087	0.10001	0.13569	0.17531	0.20517	0.23768	0.26719	0.29817	0.33351	0.34668
402.024	0.01957	0.06066	0.09983	0.13558	0.17527	0.20518	0.23774	0.26727	0.29836	0.3337	0.34695
402.24	0.01931	0.06046	0.09965	0.13548	0.17522	0.20519	0.23781	0.26734	0.29855	0.33389	0.34721
402.456	0.01906	0.06026	0.09947	0.13537	0.17517	0.20519	0.23788	0.26741	0.29873	0.33408	0.34747
402.672	0.01881	0.06008	0.0993	0.13527	0.17512	0.20521	0.23795	0.26749	0.29891	0.33426	0.34773
402.888	0.01857	0.05989	0.09914	0.13518	0.17507	0.20521	0.23803	0.26756	0.29909	0.33444	0.34798
403.103	0.01834	0.05971	0.09898	0.13509	0.17502	0.20522	0.2381	0.26763	0.29926	0.33462	0.34821
403.319	0.0181	0.05953	0.09882	0.13499	0.17496	0.20522	0.23817	0.2677	0.29941	0.33478	0.34844
403.535	0.01787	0.05935	0.09867	0.13489	0.17489	0.20521	0.23823	0.26775	0.29956	0.33493	0.34864
403.75	0.01763	0.05917	0.09851	0.13479	0.17481	0.20519	0.23828	0.2678	0.29969	0.33507	0.34882
403.966	0.01739	0.05899	0.09834	0.13468	0.17472	0.20516	0.23832	0.26783	0.2998	0.33519	0.34899
404.182	0.01715	0.0588	0.09818	0.13456	0.17463	0.20513	0.23835	0.26785	0.29989	0.33529	0.34913
404.397	0.01691	0.05861	0.09801	0.13444	0.17452	0.20508	0.23837	0.26786	0.29997	0.33538	0.34925
404.613	0.01667	0.05842	0.09785	0.13431	0.17441	0.20502	0.23838	0.26787	0.30004	0.33545	0.34935
404.828	0.01643	0.05823	0.09768	0.13417	0.17429	0.20495	0.23838	0.26786	0.30009	0.3355	0.34943
405.044	0.01618	0.05803	0.0975	0.13403	0.17416	0.20487	0.23837	0.26783	0.30011	0.33553	0.34949
405.26	0.01594	0.05783	0.09732	0.13388	0.17402	0.20478	0.23834	0.2678	0.30012	0.33555	0.34952
405.475	0.01569	0.05763	0.09714	0.13373	0.17387	0.20467	0.2383	0.26775	0.30012	0.33555	0.34953
405.691	0.01544	0.05743	0.09696	0.13357	0.17372	0.20456	0.23825	0.26769	0.30009	0.33552	0.34952
405.906	0.0152	0.05722	0.09678	0.1334	0.17356	0.20443	0.23819	0.26763	0.30005	0.33549	0.34949
406.122	0.01496	0.05702	0.0966	0.13323	0.1734	0.2043	0.23813	0.26755	0.3	0.33544	0.34944
406.337	0.01472	0.05683	0.09642	0.13307	0.17324	0.20418	0.23806	0.26748	0.29994	0.33538	0.34938
406.553	0.01449	0.05663	0.09625	0.13291	0.17308	0.20404	0.23798	0.2674	0.29987	0.33531	0.3493
406.768	0.01427	0.05645	0.09608	0.13274	0.17292	0.2039	0.2379	0.26732	0.29979	0.33522	0.34921
406.983	0.01405	0.05626	0.09591	0.13258	0.17275	0.20376	0.23782	0.26723	0.2997	0.33513	0.34911
407.199	0.01384	0.05608	0.09575	0.13242	0.17259	0.20362	0.23773	0.26714	0.2996	0.33502	0.34899
407.414	0.01363	0.05591	0.09559	0.13226	0.17243	0.20348	0.23763	0.26705	0.29949	0.33491	0.34887
407.63	0.01344	0.05575	0.09543	0.1321	0.17227	0.20333	0.23753	0.26695	0.29938	0.33478	0.34874
407.845	0.01325	0.05559	0.09528	0.13195	0.17212	0.20319	0.23743	0.26686	0.29926	0.33465	0.34859
408.06	0.01307	0.05544	0.09514	0.1318	0.17196	0.20304	0.23733	0.26676	0.29914	0.3345	0.34844
408.276	0.0129	0.05529	0.095	0.13165	0.17181	0.2029	0.23722	0.26666	0.299	0.33435	0.34828
408.491	0.01273	0.05514	0.09486	0.1315	0.17165	0.20275	0.23711	0.26656	0.29887	0.33419	0.3481
408.706	0.01257	0.05501	0.09472	0.13136	0.1715	0.20261	0.23699	0.26645	0.29872	0.33401	0.34792
408.922	0.01241	0.05487	0.09459	0.13121	0.17135	0.20246	0.23687	0.26634	0.29858	0.33383	0.34773
409.137	0.01226	0.05474	0.09446	0.13107	0.1712	0.20231	0.23674	0.26623	0.29842	0.33364	0.34753
409.352	0.01212	0.05462	0.09433	0.13093	0.17105	0.20216	0.23661	0.26611	0.29827	0.33344	0.34732
409.567	0.01198	0.05449	0.0942	0.13079	0.1709	0.20201	0.23648	0.26599	0.2981	0.33323	0.3471
409.782	0.01184	0.05437	0.09407	0.13064	0.17075	0.20186	0.23633	0.26586	0.29793	0.333	0.34687
409.998	0.01171	0.05425	0.09394	0.1305	0.17059	0.2017	0.23618	0.26572	0.29774	0.33277	0.34662
410.213	0.01158	0.05412	0.09381	0.13035	0.17043	0.20154	0.23602	0.26558	0.29755	0.33252	0.34637
410.428	0.01145	0.054	0.09367	0.1302	0.17027	0.20138	0.23585	0.26543	0.29736	0.33226	0.3461
410.643	0.01132	0.05388	0.09354	0.13005	0.17011	0.20121	0.23567	0.26527	0.29715	0.33199	0.34583
410.858	0.0112	0.05377	0.0934	0.1299	0.16995	0.20104	0.23549	0.26511	0.29694	0.33171	0.34554
411.073	0.01108	0.05365	0.09327	0.12975	0.16979	0.20087	0.2353	0.26495	0.29673	0.33143	0.34524
411.288	0.01097	0.05353	0.09313	0.1296	0.16963	0.2007	0.2351	0.26477	0.2965	0.33113	0.34494
411.503	0.01086	0.05342	0.09299	0.12945	0.16946	0.20052	0.2349	0.26459	0.29627	0.33082	0.34462
411.719	0.01075	0.0533	0.09284	0.12929	0.16929	0.20034	0.23468	0.2644	0.29604	0.33051	0.3443
411.934	0.01064	0.05319	0.0927	0.12914	0.16912	0.20017	0.23446	0.26421	0.2958	0.33019	0.34396
412.149	0.01053	0.05307	0.09255	0.12898	0.16894	0.19998	0.23423	0.26401	0.29555	0.32986	0.34362
412.364	0.01042	0.05295	0.0924	0.12881	0.16876	0.19979	0.23399	0.2638	0.29529	0.32952	0.34327
412.579	0.01031	0.05282	0.09224	0.12864	0.16857	0.1996	0.23374	0.26358	0.29502	0.32917	0.3429
412.794	0.01019	0.05269	0.09207	0.12846	0.16838	0.19939	0.23347	0.26335	0.29474	0.32881	0.34252
413.008	0.01007	0.05255	0.0919	0.12827	0.16817	0.19918	0.23319	0.2631	0.29444	0.32843	0.34212
413.223	0.00993	0.0524	0.09171	0.12807	0.16795	0.19895	0.23289	0.26284	0.29413	0.32804	0.3417
413.438	0.0098	0.05224	0.09151	0.12785	0.16771	0.19871	0.23258	0.26256	0.2938	0.32763	0.34127
413.653	0.00965	0.05207	0.0913	0.12763	0.16747	0.19845	0.23225	0.26226	0.29345	0.3272	0.34082
413.868	0.00949	0.05189	0.09108	0.12739	0.16721	0.19818	0.2319	0.26195	0.29309	0.32675	0.34035
414.083	0.00933	0.0517	0.09085	0.12714	0.16693	0.1979	0.23153	0.26161	0.2927	0.32629	0.33986
414.298	0.00915	0.0515	0.0906	0.12687	0.16664	0.19759	0.23114	0.26126	0.29229	0.3258	0.33934
414.513	0.00897	0.05128	0.09034	0.1266	0.16634	0.19728	0.23073	0.26089	0.29187	0.32529	0.3388
414.727	0.00878	0.05106	0.09006	0.12631	0.16602	0.19694	0.23031	0.2605	0.29142	0.32476	0.33824
414.942	0.00858	0.05083	0.08978	0.126	0.16569	0.19659	0.22987	0.26009	0.29096	0.32421	0.33767
415.157	0.00838	0.05059	0.08948	0.12569	0.16534	0.19623	0.22941	0.25966	0.29047	0.32364	0.33706
415.372	0.00816	0.05034	0.08918	0.12536	0.16499	0.19584	0.22894	0.25922	0.28996	0.32305	0.33644
415.587	0.00795	0.05008	0.08886	0.12503	0.16462	0.19545	0.22845	0.25875	0.28944	0.32244	0.3358
415.801	0.00772	0.04982	0.08854	0.12468	0.16423	0.19504	0.22794	0.25828	0.28889	0.32181	0.33514
416.016	0.00749	0.04955	0.08821	0.12432	0.16384	0.19462	0.22743	0.25778	0.28833	0.32117	0.33446
416.231	0.00725	0.04927	0.08787	0.12396	0.16344	0.19418	0.2269	0.25727	0.28775	0.32051	0.33377
416.445	0.00701	0.04898	0.08752	0.12358	0.16302	0.19373	0.22635	0.25675	0.28716	0.31983	0.33306
416.66	0.00677	0.04869	0.08717	0.1232	0.1626	0.19327	0.2258	0.25621	0.28655	0.31914	0.33234
416.875	0.00652	0.0484	0.08681	0.12281	0.16217	0.1928	0.22523	0.25566	0.28593	0.31844	0.3316
417.089	0.00628	0.0481	0.08645	0.12241	0.16173	0.19232	0.22466	0.25511	0.28529	0.31773	0.33085
417.304	0.00604	0.04781	0.08609	0.12202	0.16129	0.19184	0.22408	0.25454	0.28465	0.31701	0.33009
417.519	0.0058	0.04752	0.08574	0.12162	0.16085	0.19135	0.22351	0.25397	0.284	0.31628	0.32933
417.733	0.00556	0.04723	0.08538	0.12123	0.16041	0.19086	0.22292	0.2534	0.28335	0.31555	0.32856
417.948	0.00533	0.04695	0.08503	0.12084	0.15996	0.19037	0.22234	0.25282	0.28268	0.31481	0.32778
418.162	0.00511	0.04667	0.08468	0.12044	0.15952	0.18987	0.22176	0.25223	0.28202	0.31407	0.327
418.377	0.00489	0.04639	0.08434	0.12005	0.15908	0.18936	0.22117	0.25164	0.28134	0.31333	0.32622
418.591	0.00467	0.04612	0.084	0.11966	0.15863	0.18886	0.22058	0.25105	0.28066	0.31258	0.32543
418.806	0.00446	0.04585	0.08366	0.11928	0.15819	0.18835	0.21999	0.25046	0.27998	0.31182	0.32464
419.02	0.00426	0.04559	0.08333	0.11889	0.15774	0.18784	0.2194	0.24985	0.27928	0.31106	0.32384
419.235	0.00407	0.04533	0.08301	0.11851	0.1573	0.18732	0.21881	0.24924	0.27858	0.31029	0.32303
419.449	0.00388	0.04508	0.08268	0.11812	0.15685	0.1868	0.21821	0.24863	0.27786	0.3095	0.32221
419.664	0.00369	0.04483	0.08236	0.11774	0.1564	0.18627	0.21761	0.248	0.27714	0.30871	0.32137
419.878	0.00351	0.04458	0.08204	0.11735	0.15595	0.18574	0.217	0.24737	0.2764	0.30791	0.32053
420.092	0.00332	0.04433	0.08172	0.11697	0.15549	0.1852	0.21639	0.24673	0.27566	0.3071	0.31968
420.307	0.00315	0.04409	0.08141	0.11658	0.15504	0.18465	0.21578	0.24608	0.27491	0.30628	0.31881
420.521	0.00298	0.04385	0.0811	0.1162	0.15458	0.18411	0.21516	0.24543	0.27415	0.30545	0.31794
420.736	0.00281	0.04361	0.08078	0.11582	0.15412	0.18355	0.21454	0.24477	0.27339	0.30461	0.31706
420.95	0.00264	0.04338	0.08048	0.11543	0.15366	0.183	0.21392	0.2441	0.27261	0.30376	0.31617
421.164	0.00248	0.04314	0.08017	0.11504	0.15319	0.18243	0.21329	0.24342	0.27183	0.30291	0.31526
421.379	0.00232	0.04291	0.07986	0.11466	0.15272	0.18186	0.21266	0.24274	0.27103	0.30203	0.31433
421.593	0.00217	0.04269	0.07955	0.11427	0.15225	0.18129	0.21202	0.24204	0.27022	0.30115	0.3134
421.807	0.00202	0.04246	0.07924	0.11388	0.15177	0.18071	0.21138	0.24134	0.26941	0.30026	0.31245
422.021	0.00188	0.04225	0.07894	0.11349	0.1513	0.18013	0.21073	0.24063	0.26858	0.29935	0.31148
422.236	0.00174	0.04203	0.07864	0.1131	0.15082	0.17954	0.21008	0.23991	0.26775	0.29844	0.31051
422.45	0.0016	0.04182	0.07834	0.11271	0.15033	0.17895	0.20943	0.23918	0.26691	0.29751	0.30952
422.664	0.00147	0.04161	0.07805	0.11232	0.14984	0.17835	0.20877	0.23845	0.26605	0.29657	0.30852
422.878	0.00135	0.04141	0.07775	0.11193	0.14936	0.17776	0.20811	0.2377	0.26519	0.29562	0.30751
423.092	0.00123	0.04121	0.07746	0.11154	0.14886	0.17716	0.20744	0.23695	0.26432	0.29466	0.30648
423.306	0.00111	0.04101	0.07717	0.11115	0.14836	0.17655	0.20676	0.23619	0.26344	0.29369	0.30545
423.521	0.000996878	0.04081	0.07688	0.11076	0.14787	0.17594	0.20609	0.23542	0.26255	0.29271	0.3044
423.735	0.000892323	0.04062	0.0766	0.11037	0.14737	0.17534	0.20541	0.23465	0.26166	0.29173	0.30334
423.949	0.000794248	0.04044	0.07632	0.10998	0.14687	0.17474	0.20474	0.23387	0.26076	0.29074	0.30228
424.163	0.000701263	0.04026	0.07604	0.1096	0.14638	0.17413	0.20406	0.23309	0.25986	0.28974	0.30121
424.377	0.000612963	0.04008	0.07577	0.10921	0.14588	0.17352	0.20337	0.2323	0.25895	0.28873	0.30013
424.591	0.000529818	0.03991	0.0755	0.10883	0.14538	0.17292	0.20269	0.23151	0.25804	0.28771	0.29904
424.805	0.000452271	0.03974	0.07523	0.10844	0.14488	0.17231	0.202	0.23071	0.25712	0.28669	0.29795
425.019	0.000381364	0.03957	0.07497	0.10806	0.14438	0.1717	0.20131	0.2299	0.2562	0.28566	0.29685
425.233	0.000317218	0.03942	0.07471	0.10768	0.14389	0.1711	0.20062	0.2291	0.25528	0.28464	0.29574
425.447	0.000258594	0.03926	0.07445	0.10731	0.14339	0.17049	0.19994	0.22829	0.25436	0.2836	0.29463
425.661	0.000205179	0.03911	0.0742	0.10694	0.1429	0.16989	0.19925	0.22748	0.25343	0.28256	0.29352
425.875	0.000156567	0.03896	0.07395	0.10656	0.1424	0.16929	0.19856	0.22667	0.2525	0.28152	0.2924
426.089	0.000112859	0.03882	0.07371	0.10619	0.14191	0.16869	0.19787	0.22585	0.25157	0.28047	0.29128
426.303	7.34372e-05	0.03867	0.07346	0.10583	0.14141	0.16809	0.19718	0.22504	0.25064	0.27942	0.29015
426.517	3.70372e-05	0.03853	0.07322	0.10546	0.14092	0.16748	0.19648	0.22421	0.2497	0.27836	0.28902
426.73	2.78159e-06	0.03839	0.07297	0.10509	0.14042	0.16688	0.19578	0.22338	0.24876	0.27729	0.28788
426.944	-3.1125e-05	0.03825	0.07272	0.10472	0.13991	0.16627	0.19508	0.22255	0.24782	0.27622	0.28674
427.158	-6.64323e-05	0.03811	0.07247	0.10434	0.13941	0.16566	0.19437	0.2217	0.24687	0.27514	0.28558
427.372	-0.000104527	0.03796	0.07222	0.10396	0.13889	0.16503	0.19365	0.22085	0.24591	0.27405	0.28441
427.586	-0.000146612	0.0378	0.07195	0.10357	0.13837	0.16441	0.19292	0.21999	0.24494	0.27294	0.28324
427.8	-0.00019328	0.03764	0.07168	0.10317	0.13783	0.16377	0.19218	0.21911	0.24396	0.27182	0.28205
428.013	-0.000244048	0.03747	0.07141	0.10277	0.13729	0.16312	0.19143	0.21823	0.24297	0.2707	0.28085
428.227	-0.000297633	0.03729	0.07112	0.10236	0.13675	0.16248	0.19068	0.21733	0.24198	0.26956	0.27964
428.441	-0.00035268	0.03712	0.07084	0.10195	0.13619	0.16182	0.18992	0.21644	0.24098	0.26842	0.27843
428.655	-0.000409227	0.03694	0.07054	0.10153	0.13564	0.16116	0.18915	0.21553	0.23997	0.26727	0.27721
428.868	-0.000467264	0.03675	0.07025	0.10111	0.13508	0.1605	0.18837	0.21462	0.23896	0.26611	0.27598
429.082	-0.000525831	0.03657	0.06995	0.10069	0.13451	0.15983	0.1876	0.2137	0.23794	0.26495	0.27475
429.296	-0.000584267	0.03638	0.06965	0.10027	0.13395	0.15916	0.18681	0.21278	0.23692	0.26378	0.27351
429.509	-0.000641219	0.0362	0.06935	0.09984	0.13338	0.15849	0.18602	0.21185	0.2359	0.26261	0.27227
429.723	-0.000695143	0.03601	0.06904	0.09941	0.13281	0.15782	0.18523	0.21092	0.23487	0.26143	0.27102
429.937	-0.000745013	0.03583	0.06874	0.09899	0.13223	0.15715	0.18444	0.20999	0.23384	0.26025	0.26977
430.15	-0.000791253	0.03565	0.06844	0.09856	0.13166	0.15648	0.18364	0.20906	0.23281	0.25907	0.26852
430.364	-0.000834997	0.03547	0.06814	0.09814	0.13109	0.15581	0.18284	0.20812	0.23178	0.25788	0.26726
430.577	-0.000876766	0.0353	0.06784	0.09772	0.13052	0.15513	0.18204	0.20718	0.23073	0.25669	0.266
430.791	-0.000917001	0.03512	0.06754	0.09729	0.12994	0.15445	0.18123	0.20623	0.22969	0.25549	0.26473
431.004	-0.000955783	0.03494	0.06724	0.09686	0.12936	0.15377	0.18041	0.20528	0.22864	0.25428	0.26346
431.218	-0.000992076	0.03476	0.06694	0.09644	0.12878	0.15309	0.17959	0.20433	0.22758	0.25307	0.26218
431.431	-0.00103	0.03459	0.06663	0.09601	0.12819	0.15241	0.17877	0.20337	0.22652	0.25186	0.2609
431.645	-0.00106	0.03442	0.06633	0.09559	0.12761	0.15172	0.17795	0.20241	0.22546	0.25064	0.25961
431.858	-0.00109	0.03425	0.06603	0.09516	0.12702	0.15104	0.17712	0.20145	0.22438	0.24941	0.25831
432.072	-0.00112	0.03407	0.06572	0.09473	0.12643	0.15035	0.17628	0.20048	0.22331	0.24818	0.25701
432.285	-0.00114	0.0339	0.06542	0.0943	0.12584	0.14965	0.17545	0.19951	0.22223	0.24694	0.25571
432.499	-0.00117	0.03373	0.06512	0.09387	0.12525	0.14896	0.17461	0.19853	0.22114	0.24569	0.25439
432.712	-0.00119	0.03357	0.06481	0.09344	0.12466	0.14826	0.17376	0.19755	0.22005	0.24444	0.25308
432.926	-0.00122	0.0334	0.06451	0.09301	0.12406	0.14757	0.17291	0.19657	0.21895	0.24318	0.25175
433.139	-0.00124	0.03323	0.0642	0.09258	0.12346	0.14686	0.17206	0.19558	0.21784	0.24192	0.25042
433.352	-0.00126	0.03306	0.06389	0.09214	0.12285	0.14616	0.1712	0.19459	0.21673	0.24065	0.24908
433.566	-0.00128	0.03289	0.06358	0.0917	0.12225	0.14545	0.17034	0.19359	0.21561	0.23937	0.24773
433.779	-0.0013	0.03273	0.06327	0.09126	0.12164	0.14474	0.16947	0.19259	0.21448	0.23809	0.24638
433.992	-0.00132	0.03256	0.06296	0.09082	0.12103	0.14402	0.1686	0.19159	0.21335	0.2368	0.24502
434.206	-0.00134	0.0324	0.06266	0.09038	0.12042	0.14331	0.16773	0.19058	0.21222	0.2355	0.24366
434.419	-0.00135	0.03224	0.06235	0.08994	0.11981	0.14259	0.16686	0.18957	0.21108	0.23421	0.2423
434.632	-0.00136	0.03208	0.06205	0.0895	0.11921	0.14188	0.16599	0.18856	0.20994	0.2329	0.24093
434.845	-0.00137	0.03193	0.06175	0.08907	0.1186	0.14116	0.16512	0.18755	0.2088	0.2316	0.23955
435.059	-0.00137	0.03179	0.06145	0.08864	0.118	0.14045	0.16424	0.18654	0.20765	0.23029	0.23818
435.272	-0.00136	0.03164	0.06116	0.08821	0.11739	0.13974	0.16337	0.18553	0.20651	0.22899	0.2368
435.485	-0.00135	0.03151	0.06087	0.08778	0.11679	0.13903	0.1625	0.18452	0.20536	0.22768	0.23542
435.698	-0.00134	0.03137	0.06059	0.08735	0.1162	0.13832	0.16163	0.18351	0.20421	0.22637	0.23404
435.911	-0.00132	0.03124	0.06031	0.08693	0.1156	0.13761	0.16076	0.1825	0.20306	0.22506	0.23265
436.124	-0.0013	0.03112	0.06003	0.08651	0.11501	0.1369	0.15989	0.18149	0.20191	0.22374	0.23126
436.338	-0.00128	0.03099	0.05975	0.08609	0.11441	0.13619	0.15902	0.18048	0.20075	0.22243	0.22986
436.551	-0.00125	0.03087	0.05948	0.08567	0.11382	0.13549	0.15815	0.17947	0.19959	0.22111	0.22846
436.764	-0.00122	0.03075	0.05921	0.08526	0.11323	0.13478	0.15728	0.17846	0.19844	0.21979	0.22706
436.977	-0.00118	0.03064	0.05894	0.08485	0.11264	0.13407	0.15642	0.17745	0.19728	0.21847	0.22566
437.19	-0.00114	0.03053	0.05868	0.08444	0.11205	0.13337	0.15555	0.17644	0.19612	0.21716	0.22426
437.403	-0.00109	0.03042	0.05842	0.08404	0.11148	0.13267	0.15469	0.17544	0.19497	0.21584	0.22286
437.616	-0.00104	0.03032	0.05817	0.08364	0.1109	0.13198	0.15384	0.17444	0.19382	0.21454	0.22147
437.829	-0.00098089	0.03023	0.05792	0.08325	0.11033	0.13129	0.15299	0.17344	0.19267	0.21323	0.22007
438.042	-0.00091767	0.03014	0.05768	0.08286	0.10977	0.13061	0.15215	0.17245	0.19153	0.21193	0.21868
438.255	-0.000849128	0.03006	0.05744	0.08248	0.10921	0.12993	0.15131	0.17147	0.19039	0.21064	0.21729
438.468	-0.000776035	0.02998	0.05721	0.08211	0.10866	0.12925	0.15047	0.17049	0.18925	0.20935	0.21591
438.681	-0.000699913	0.02991	0.05698	0.08174	0.10811	0.12858	0.14964	0.16951	0.18812	0.20806	0.21452
438.894	-0.000623204	0.02984	0.05676	0.08136	0.10757	0.12791	0.14881	0.16853	0.18699	0.20677	0.21314
439.107	-0.000546826	0.02976	0.05653	0.08099	0.10702	0.12724	0.14798	0.16755	0.18586	0.20549	0.21176
439.319	-0.000471071	0.02969	0.05631	0.08062	0.10648	0.12656	0.14716	0.16657	0.18472	0.20421	0.21037
439.532	-0.000396698	0.02961	0.05608	0.08024	0.10593	0.12589	0.14633	0.16559	0.18359	0.20292	0.20898
439.745	-0.00032372	0.02954	0.05585	0.07987	0.10539	0.12522	0.1455	0.16461	0.18246	0.20164	0.2076
439.958	-0.000252501	0.02946	0.05563	0.07949	0.10484	0.12454	0.14467	0.16363	0.18132	0.20036	0.20621
440.171	-0.000183832	0.02938	0.0554	0.07911	0.10429	0.12386	0.14384	0.16265	0.18019	0.19908	0.20482
440.384	-0.000117521	0.0293	0.05517	0.07874	0.10375	0.12318	0.14302	0.16167	0.17905	0.19779	0.20344
440.596	-5.34319e-05	0.02921	0.05494	0.07835	0.1032	0.1225	0.14219	0.16069	0.17792	0.19651	0.20205
440.809	7.85217e-06	0.02913	0.05471	0.07797	0.10265	0.12182	0.14136	0.15971	0.17679	0.19523	0.20066
441.022	6.64593e-05	0.02904	0.05447	0.07759	0.1021	0.12114	0.14053	0.15872	0.17565	0.19395	0.19928
441.235	0.000122859	0.02895	0.05424	0.0772	0.10155	0.12046	0.1397	0.15774	0.17452	0.19267	0.19789
441.447	0.000177307	0.02885	0.054	0.07681	0.101	0.11977	0.13887	0.15676	0.17339	0.19139	0.19651
441.66	0.000229692	0.02876	0.05376	0.07642	0.10045	0.11909	0.13805	0.15577	0.17226	0.19011	0.19512
441.873	0.000280081	0.02866	0.05352	0.07603	0.0999	0.1184	0.13722	0.15479	0.17113	0.18883	0.19374
442.085	0.000329409	0.02856	0.05328	0.07564	0.09935	0.11772	0.13639	0.15381	0.17	0.18756	0.19236
442.298	0.000377948	0.02846	0.05304	0.07525	0.0988	0.11703	0.13557	0.15283	0.16887	0.18629	0.19098
442.511	0.000425767	0.02836	0.0528	0.07486	0.09826	0.11635	0.13474	0.15185	0.16775	0.18502	0.1896
442.723	0.000473712	0.02826	0.05256	0.07447	0.09771	0.11567	0.13392	0.15087	0.16663	0.18375	0.18823
442.936	0.000522592	0.02816	0.05232	0.07409	0.09717	0.11499	0.1331	0.1499	0.16551	0.18249	0.18687
443.148	0.000572438	0.02806	0.05209	0.0737	0.09663	0.11431	0.13228	0.14893	0.1644	0.18124	0.1855
443.361	0.000622579	0.02796	0.05185	0.07332	0.09609	0.11364	0.13147	0.14796	0.1633	0.17999	0.18415
443.574	0.00067313	0.02787	0.05162	0.07294	0.09556	0.11297	0.13066	0.147	0.1622	0.17875	0.1828
443.786	0.00072478	0.02777	0.05138	0.07256	0.09503	0.1123	0.12986	0.14604	0.1611	0.17751	0.18146
443.999	0.000777581	0.02768	0.05115	0.07218	0.0945	0.11163	0.12906	0.14509	0.16001	0.17627	0.18012
444.211	0.000830893	0.02758	0.05092	0.0718	0.09397	0.11097	0.12826	0.14413	0.15893	0.17505	0.17879
444.424	0.000884113	0.02749	0.05069	0.07143	0.09345	0.11031	0.12746	0.14319	0.15785	0.17382	0.17746
444.636	0.000936606	0.02739	0.05046	0.07105	0.09293	0.10964	0.12667	0.14224	0.15677	0.1726	0.17614
444.849	0.00098798	0.0273	0.05023	0.07068	0.0924	0.10898	0.12587	0.14129	0.1557	0.17139	0.17482
445.061	0.00104	0.0272	0.05	0.0703	0.09188	0.10832	0.12508	0.14035	0.15462	0.17017	0.1735
445.273	0.00109	0.02711	0.04976	0.06993	0.09136	0.10766	0.12429	0.13941	0.15355	0.16896	0.17219
445.486	0.00114	0.02701	0.04953	0.06955	0.09084	0.10701	0.1235	0.13847	0.15249	0.16775	0.17088
445.698	0.00119	0.02691	0.0493	0.06918	0.09032	0.10635	0.12271	0.13754	0.15143	0.16654	0.16958
445.91	0.00124	0.02682	0.04906	0.0688	0.0898	0.10569	0.12193	0.1366	0.15036	0.16534	0.16828
446.123	0.00128	0.02672	0.04883	0.06843	0.08928	0.10504	0.12114	0.13567	0.14931	0.16414	0.16698
446.335	0.00133	0.02662	0.04859	0.06805	0.08876	0.10438	0.12035	0.13474	0.14825	0.16294	0.16569
446.547	0.00137	0.02651	0.04835	0.06768	0.08824	0.10372	0.11957	0.1338	0.1472	0.16175	0.1644
446.76	0.00141	0.02641	0.04811	0.0673	0.08772	0.10307	0.11878	0.13287	0.14614	0.16055	0.16311
446.972	0.00146	0.02631	0.04787	0.06693	0.0872	0.10242	0.118	0.13195	0.14509	0.15936	0.16183
447.184	0.0015	0.02621	0.04763	0.06655	0.08669	0.10176	0.11722	0.13102	0.14405	0.15818	0.16055
447.397	0.00154	0.0261	0.04739	0.06618	0.08617	0.10111	0.11644	0.1301	0.143	0.15699	0.15927
447.609	0.00159	0.026	0.04714	0.0658	0.08565	0.10046	0.11566	0.12917	0.14196	0.15581	0.158
447.821	0.00163	0.0259	0.0469	0.06543	0.08513	0.09982	0.11488	0.12825	0.14093	0.15463	0.15673
448.033	0.00167	0.0258	0.04666	0.06506	0.08462	0.09917	0.1141	0.12734	0.13989	0.15346	0.15546
448.245	0.00172	0.02569	0.04641	0.06469	0.0841	0.09852	0.11333	0.12642	0.13886	0.15228	0.1542
448.458	0.00176	0.02559	0.04617	0.06431	0.08359	0.09788	0.11255	0.12551	0.13783	0.15111	0.15294
448.67	0.00181	0.02549	0.04593	0.06394	0.08308	0.09724	0.11178	0.1246	0.1368	0.14995	0.15168
448.882	0.00185	0.02539	0.04568	0.06357	0.08256	0.0966	0.11101	0.12369	0.13578	0.14878	0.15043
449.094	0.00189	0.02529	0.04544	0.0632	0.08205	0.09596	0.11023	0.12279	0.13475	0.14761	0.14918
449.306	0.00194	0.02519	0.0452	0.06284	0.08153	0.09532	0.10946	0.12188	0.13373	0.14645	0.14793
449.518	0.00198	0.02509	0.04495	0.06247	0.08102	0.09469	0.10869	0.12098	0.13271	0.14529	0.14668
449.73	0.00203	0.02499	0.04471	0.0621	0.08051	0.09405	0.10792	0.12008	0.13169	0.14413	0.14543
449.942	0.00207	0.02489	0.04446	0.06173	0.08	0.09342	0.10715	0.11918	0.13068	0.14297	0.14419
450.154	0.00212	0.02479	0.04421	0.06136	0.07949	0.09278	0.10638	0.11828	0.12967	0.14182	0.14295
450.366	0.00216	0.02469	0.04397	0.06099	0.07897	0.09215	0.10561	0.11739	0.12865	0.14066	0.14171
450.578	0.0022	0.02459	0.04372	0.06062	0.07846	0.09152	0.10485	0.11649	0.12765	0.13951	0.14047
450.79	0.00225	0.02449	0.04348	0.06026	0.07795	0.09089	0.10408	0.1156	0.12664	0.13836	0.13924
451.002	0.00229	0.02438	0.04323	0.05989	0.07744	0.09026	0.10332	0.11471	0.12563	0.13721	0.13801
451.214	0.00233	0.02428	0.04298	0.05952	0.07693	0.08963	0.10255	0.11382	0.12463	0.13606	0.13677
451.426	0.00237	0.02418	0.04274	0.05915	0.07642	0.08901	0.10179	0.11294	0.12363	0.13492	0.13555
451.638	0.00242	0.02408	0.04249	0.05878	0.07591	0.08838	0.10102	0.11205	0.12263	0.13378	0.13432
451.85	0.00246	0.02397	0.04224	0.05842	0.0754	0.08776	0.10026	0.11117	0.12163	0.13264	0.1331
452.062	0.0025	0.02387	0.042	0.05805	0.07489	0.08714	0.09951	0.1103	0.12064	0.1315	0.13189
452.274	0.00254	0.02378	0.04175	0.05769	0.07439	0.08653	0.09875	0.10942	0.11965	0.13037	0.13067
452.485	0.00259	0.02368	0.04151	0.05733	0.07389	0.08592	0.098	0.10856	0.11867	0.12925	0.12947
452.697	0.00263	0.02358	0.04127	0.05697	0.07339	0.08531	0.09725	0.10769	0.11769	0.12812	0.12826
452.909	0.00268	0.02349	0.04103	0.05661	0.07289	0.0847	0.09651	0.10683	0.11671	0.12701	0.12707
453.121	0.00272	0.02339	0.04079	0.05625	0.07239	0.0841	0.09576	0.10597	0.11574	0.12589	0.12587
453.333	0.00277	0.02329	0.04055	0.05589	0.07189	0.08349	0.09502	0.10512	0.11477	0.12478	0.12468
453.544	0.00281	0.0232	0.04031	0.05554	0.0714	0.0829	0.09428	0.10427	0.1138	0.12368	0.1235
453.756	0.00286	0.02311	0.04008	0.05519	0.07091	0.0823	0.09355	0.10342	0.11284	0.12258	0.12232
453.968	0.00291	0.02302	0.03985	0.05484	0.07042	0.08171	0.09282	0.10258	0.11189	0.12149	0.12115
454.18	0.00296	0.02293	0.03961	0.05449	0.06993	0.08112	0.09209	0.10175	0.11094	0.1204	0.11999
454.391	0.00301	0.02284	0.03939	0.05415	0.06945	0.08054	0.09137	0.10092	0.10999	0.11932	0.11883
454.603	0.00306	0.02275	0.03916	0.05381	0.06897	0.07997	0.09066	0.1001	0.10906	0.11825	0.11768
454.815	0.00311	0.02267	0.03894	0.05348	0.0685	0.0794	0.08995	0.09928	0.10813	0.11719	0.11655
455.026	0.00317	0.02259	0.03873	0.05315	0.06803	0.07883	0.08925	0.09847	0.10721	0.11613	0.11542
455.238	0.00323	0.02252	0.03851	0.05282	0.06756	0.07827	0.08855	0.09767	0.10629	0.11509	0.11429
455.449	0.00329	0.02244	0.0383	0.0525	0.0671	0.07772	0.08786	0.09688	0.10538	0.11405	0.11318
455.661	0.00335	0.02237	0.03809	0.05218	0.06664	0.07717	0.08718	0.09609	0.10448	0.11302	0.11208
455.873	0.00341	0.02229	0.03789	0.05186	0.06619	0.07662	0.0865	0.0953	0.10358	0.112	0.11098
456.084	0.00347	0.02222	0.03769	0.05155	0.06574	0.07608	0.08583	0.09453	0.10269	0.11098	0.1099
456.296	0.00353	0.02215	0.03749	0.05124	0.06529	0.07554	0.08516	0.09376	0.10181	0.10997	0.10882
456.507	0.00359	0.02208	0.03729	0.05093	0.06485	0.075	0.0845	0.09299	0.10093	0.10897	0.10775
456.719	0.00365	0.02201	0.03709	0.05063	0.0644	0.07447	0.08384	0.09223	0.10006	0.10797	0.10669
456.93	0.00371	0.02195	0.0369	0.05032	0.06397	0.07394	0.08318	0.09147	0.0992	0.10699	0.10563
457.142	0.00377	0.02188	0.03671	0.05002	0.06353	0.07342	0.08253	0.09072	0.09833	0.10601	0.10458
457.353	0.00383	0.02181	0.03652	0.04972	0.0631	0.0729	0.08189	0.08997	0.09748	0.10503	0.10354
457.565	0.00389	0.02174	0.03633	0.04943	0.06267	0.07238	0.08125	0.08923	0.09663	0.10406	0.10251
457.776	0.00395	0.02168	0.03614	0.04913	0.06224	0.07186	0.08061	0.0885	0.09578	0.1031	0.10149
457.987	0.00402	0.02161	0.03596	0.04884	0.06182	0.07135	0.07998	0.08776	0.09495	0.10215	0.10047
458.199	0.00408	0.02155	0.03578	0.04855	0.0614	0.07084	0.07936	0.08704	0.09411	0.10121	0.09946
458.41	0.00414	0.02148	0.0356	0.04827	0.06098	0.07033	0.07874	0.08632	0.09328	0.10027	0.09846
458.621	0.0042	0.02142	0.03542	0.04798	0.06057	0.06983	0.07812	0.0856	0.09246	0.09933	0.09747
458.833	0.00426	0.02136	0.03525	0.0477	0.06016	0.06933	0.07751	0.08488	0.09165	0.09841	0.09648
459.044	0.00432	0.02129	0.03508	0.04742	0.05975	0.06883	0.0769	0.08417	0.09083	0.09749	0.0955
459.255	0.00438	0.02123	0.0349	0.04714	0.05934	0.06833	0.0763	0.08347	0.09003	0.09657	0.09453
459.467	0.00443	0.02116	0.03473	0.04686	0.05894	0.06784	0.0757	0.08277	0.08923	0.09567	0.09356
459.678	0.00449	0.0211	0.03456	0.04658	0.05854	0.06734	0.0751	0.08207	0.08843	0.09476	0.0926
459.889	0.00455	0.02104	0.03439	0.04631	0.05814	0.06685	0.07451	0.08137	0.08764	0.09387	0.09165
460.101	0.0046	0.02097	0.03423	0.04603	0.05774	0.06637	0.07392	0.08068	0.08685	0.09298	0.09071
460.312	0.00466	0.02091	0.03406	0.04576	0.05735	0.06588	0.07333	0.08	0.08607	0.09209	0.08977
460.523	0.00471	0.02084	0.0339	0.04549	0.05696	0.0654	0.07275	0.07931	0.0853	0.09122	0.08883
460.734	0.00477	0.02078	0.03373	0.04522	0.05657	0.06492	0.07217	0.07864	0.08453	0.09034	0.08791
460.945	0.00482	0.02071	0.03357	0.04495	0.05618	0.06444	0.0716	0.07796	0.08377	0.08948	0.08699
461.156	0.00487	0.02065	0.03341	0.04468	0.05579	0.06397	0.07103	0.07729	0.08301	0.08862	0.08608
461.368	0.00492	0.02058	0.03325	0.04442	0.05541	0.0635	0.07047	0.07663	0.08226	0.08777	0.08518
461.579	0.00497	0.02052	0.03309	0.04416	0.05503	0.06303	0.0699	0.07597	0.08151	0.08692	0.08428
461.79	0.00502	0.02045	0.03293	0.04389	0.05466	0.06256	0.06935	0.07531	0.08077	0.08608	0.08339
462.001	0.00507	0.02039	0.03277	0.04364	0.05428	0.0621	0.06879	0.07466	0.08003	0.08525	0.0825
462.212	0.00513	0.02032	0.03262	0.04338	0.05391	0.06164	0.06825	0.07402	0.0793	0.08442	0.08163
462.423	0.00518	0.02026	0.03246	0.04312	0.05355	0.06119	0.0677	0.07337	0.07858	0.0836	0.08076
462.634	0.00523	0.0202	0.03231	0.04287	0.05318	0.06074	0.06716	0.07274	0.07786	0.08279	0.07989
462.845	0.00528	0.02014	0.03216	0.04262	0.05282	0.06029	0.06663	0.07211	0.07715	0.08198	0.07904
463.056	0.00533	0.02008	0.03201	0.04237	0.05246	0.05984	0.0661	0.07148	0.07645	0.08118	0.07819
463.267	0.00538	0.02002	0.03187	0.04212	0.05211	0.0594	0.06557	0.07086	0.07575	0.08039	0.07735
463.478	0.00544	0.01997	0.03172	0.04187	0.05176	0.05897	0.06506	0.07025	0.07505	0.07961	0.07651
463.689	0.00549	0.01991	0.03158	0.04163	0.05141	0.05853	0.06454	0.06964	0.07437	0.07883	0.07568
463.9	0.00554	0.01985	0.03143	0.04139	0.05106	0.0581	0.06403	0.06903	0.07368	0.07805	0.07486
464.111	0.00559	0.0198	0.03129	0.04114	0.05072	0.05767	0.06352	0.06843	0.073	0.07728	0.07405
464.322	0.00564	0.01974	0.03115	0.0409	0.05038	0.05724	0.06301	0.06783	0.07233	0.07652	0.07323
464.533	0.00569	0.01968	0.031	0.04066	0.05004	0.05682	0.06251	0.06723	0.07166	0.07576	0.07243
464.743	0.00573	0.01962	0.03086	0.04042	0.0497	0.0564	0.06201	0.06664	0.07099	0.07501	0.07163
464.954	0.00578	0.01956	0.03072	0.04018	0.04936	0.05598	0.06152	0.06605	0.07033	0.07426	0.07083
465.165	0.00582	0.01951	0.03057	0.03993	0.04902	0.05556	0.06102	0.06547	0.06967	0.07352	0.07004
465.376	0.00586	0.01945	0.03043	0.03969	0.04869	0.05514	0.06053	0.06489	0.06902	0.07278	0.06926
465.587	0.00591	0.01939	0.03029	0.03946	0.04835	0.05473	0.06005	0.06432	0.06837	0.07205	0.06848
465.798	0.00595	0.01933	0.03015	0.03922	0.04802	0.05432	0.05957	0.06375	0.06772	0.07133	0.0677
466.008	0.006	0.01928	0.03001	0.03899	0.0477	0.05392	0.05909	0.06318	0.06709	0.07061	0.06694
466.219	0.00604	0.01923	0.02987	0.03875	0.04738	0.05352	0.05862	0.06263	0.06646	0.0699	0.06618
466.43	0.00609	0.01918	0.02974	0.03853	0.04706	0.05312	0.05815	0.06207	0.06583	0.0692	0.06543
466.64	0.00614	0.01913	0.0296	0.0383	0.04674	0.05273	0.05769	0.06153	0.06522	0.0685	0.06468
466.851	0.00619	0.01909	0.02947	0.03808	0.04643	0.05235	0.05723	0.06099	0.0646	0.06781	0.06395
467.062	0.00624	0.01904	0.02935	0.03786	0.04613	0.05196	0.05678	0.06045	0.064	0.06713	0.06322
467.273	0.00629	0.01901	0.02922	0.03764	0.04583	0.05159	0.05634	0.05993	0.0634	0.06646	0.0625
467.483	0.00635	0.01897	0.0291	0.03743	0.04553	0.05122	0.0559	0.05941	0.06282	0.06579	0.06178
467.694	0.00641	0.01894	0.02898	0.03723	0.04524	0.05085	0.05547	0.0589	0.06223	0.06514	0.06108
467.904	0.00647	0.01891	0.02887	0.03702	0.04495	0.05049	0.05504	0.05839	0.06166	0.06449	0.06038
468.115	0.00653	0.01888	0.02876	0.03682	0.04467	0.05014	0.05462	0.05789	0.06109	0.06384	0.05969
468.326	0.0066	0.01886	0.02865	0.03663	0.04439	0.04978	0.0542	0.0574	0.06053	0.06321	0.059
468.536	0.00667	0.01884	0.02854	0.03644	0.04411	0.04944	0.05379	0.05692	0.05998	0.06258	0.05833
468.747	0.00674	0.01883	0.02844	0.03625	0.04385	0.0491	0.05338	0.05644	0.05943	0.06196	0.05766
468.957	0.00681	0.01882	0.02835	0.03608	0.04358	0.04877	0.05299	0.05598	0.05889	0.06136	0.057
469.168	0.00689	0.01881	0.02826	0.0359	0.04333	0.04844	0.0526	0.05552	0.05836	0.06076	0.05636
469.378	0.00698	0.01881	0.02817	0.03574	0.04308	0.04812	0.05221	0.05507	0.05784	0.06017	0.05572
469.589	0.00706	0.01881	0.02809	0.03558	0.04284	0.04781	0.05184	0.05462	0.05733	0.05959	0.05509
469.799	0.00716	0.01882	0.02802	0.03542	0.04261	0.0475	0.05147	0.05419	0.05683	0.05902	0.05447
470.01	0.00726	0.01884	0.02795	0.03528	0.04238	0.04721	0.05111	0.05377	0.05634	0.05846	0.05386
470.22	0.00736	0.01886	0.02789	0.03514	0.04216	0.04692	0.05076	0.05336	0.05586	0.05791	0.05327
470.43	0.00747	0.01889	0.02783	0.03501	0.04195	0.04664	0.05042	0.05295	0.05538	0.05737	0.05268
470.641	0.00758	0.01892	0.02778	0.03488	0.04174	0.04636	0.05009	0.05256	0.05492	0.05685	0.0521
470.851	0.0077	0.01896	0.02774	0.03476	0.04155	0.0461	0.04976	0.05218	0.05447	0.05633	0.05154
471.062	0.00782	0.01901	0.0277	0.03465	0.04136	0.04584	0.04945	0.0518	0.05402	0.05582	0.05099
471.272	0.00795	0.01906	0.02767	0.03455	0.04118	0.0456	0.04914	0.05144	0.05359	0.05533	0.05044
471.482	0.00808	0.01911	0.02765	0.03446	0.04101	0.04536	0.04884	0.05108	0.05317	0.05484	0.04991
471.693	0.00822	0.01918	0.02763	0.03437	0.04085	0.04513	0.04855	0.05074	0.05275	0.05437	0.04939
471.903	0.00837	0.01925	0.02761	0.03429	0.04069	0.0449	0.04827	0.0504	0.05235	0.05391	0.04888
472.113	0.00851	0.01932	0.02761	0.03422	0.04054	0.04469	0.048	0.05008	0.05195	0.05345	0.04838
472.323	0.00867	0.0194	0.02761	0.03415	0.0404	0.04448	0.04773	0.04976	0.05157	0.05301	0.04789
472.534	0.00883	0.01948	0.02761	0.03409	0.04026	0.04428	0.04747	0.04945	0.05119	0.05258	0.04741
472.744	0.00899	0.01957	0.02762	0.03404	0.04014	0.04409	0.04722	0.04915	0.05083	0.05215	0.04695
472.954	0.00916	0.01967	0.02763	0.03399	0.04002	0.04391	0.04698	0.04886	0.05047	0.05174	0.04649
473.164	0.00933	0.01977	0.02765	0.03395	0.0399	0.04373	0.04675	0.04858	0.05012	0.05133	0.04604
473.374	0.0095	0.01987	0.02768	0.03391	0.0398	0.04356	0.04652	0.0483	0.04978	0.05094	0.0456
473.585	0.00968	0.01998	0.02771	0.03388	0.03969	0.0434	0.0463	0.04803	0.04945	0.05055	0.04517
473.795	0.00986	0.02008	0.02774	0.03386	0.0396	0.04324	0.04609	0.04777	0.04912	0.05017	0.04475
474.005	0.01005	0.0202	0.02778	0.03384	0.03951	0.04309	0.04588	0.04752	0.04881	0.0498	0.04434
474.215	0.01024	0.02031	0.02783	0.03383	0.03942	0.04295	0.04568	0.04727	0.0485	0.04944	0.04394
474.425	0.01043	0.02043	0.02787	0.03382	0.03935	0.04281	0.04549	0.04703	0.0482	0.04909	0.04355
474.635	0.01062	0.02056	0.02792	0.03382	0.03927	0.04268	0.0453	0.0468	0.0479	0.04875	0.04317
474.845	0.01082	0.02068	0.02798	0.03382	0.0392	0.04255	0.04512	0.04657	0.04762	0.04841	0.04279
475.055	0.01102	0.02081	0.02804	0.03382	0.03914	0.04243	0.04495	0.04635	0.04734	0.04808	0.04242
475.265	0.01122	0.02094	0.0281	0.03383	0.03908	0.04232	0.04478	0.04614	0.04707	0.04776	0.04206
475.475	0.01143	0.02108	0.02817	0.03385	0.03903	0.04221	0.04462	0.04593	0.0468	0.04744	0.04171
475.685	0.01164	0.02121	0.02824	0.03386	0.03898	0.0421	0.04446	0.04573	0.04654	0.04713	0.04137
475.895	0.01184	0.02135	0.02831	0.03388	0.03893	0.042	0.0443	0.04553	0.04629	0.04683	0.04103
476.105	0.01205	0.02149	0.02839	0.0339	0.03889	0.0419	0.04415	0.04533	0.04604	0.04653	0.0407
476.315	0.01226	0.02163	0.02846	0.03393	0.03884	0.0418	0.044	0.04514	0.0458	0.04623	0.04037
476.525	0.01247	0.02177	0.02854	0.03395	0.0388	0.04171	0.04386	0.04495	0.04556	0.04595	0.04005
476.735	0.01268	0.02191	0.02862	0.03398	0.03877	0.04162	0.04372	0.04477	0.04532	0.04566	0.03973
476.945	0.0129	0.02205	0.0287	0.03401	0.03873	0.04154	0.04358	0.04459	0.04509	0.04538	0.03942
477.155	0.01311	0.02219	0.02878	0.03404	0.0387	0.04145	0.04345	0.04441	0.04487	0.04511	0.03912
477.365	0.01332	0.02234	0.02887	0.03408	0.03867	0.04137	0.04332	0.04424	0.04465	0.04484	0.03882
477.574	0.01354	0.02249	0.02896	0.03411	0.03865	0.0413	0.0432	0.04407	0.04444	0.04458	0.03853
477.784	0.01375	0.02263	0.02905	0.03415	0.03862	0.04123	0.04308	0.04391	0.04423	0.04432	0.03824
477.994	0.01397	0.02278	0.02914	0.03419	0.0386	0.04116	0.04296	0.04375	0.04402	0.04407	0.03796
478.204	0.01419	0.02293	0.02923	0.03424	0.03859	0.04109	0.04285	0.0436	0.04383	0.04383	0.03769
478.414	0.01441	0.02308	0.02933	0.03428	0.03857	0.04103	0.04274	0.04345	0.04363	0.04359	0.03742
478.623	0.01463	0.02324	0.02943	0.03433	0.03856	0.04098	0.04264	0.0433	0.04344	0.04335	0.03715
478.833	0.01485	0.02339	0.02953	0.03438	0.03855	0.04092	0.04253	0.04315	0.04326	0.04312	0.03689
479.043	0.01507	0.02355	0.02963	0.03443	0.03854	0.04087	0.04244	0.04301	0.04308	0.04289	0.03664
479.253	0.01529	0.0237	0.02974	0.03448	0.03854	0.04082	0.04234	0.04288	0.0429	0.04267	0.03639
479.462	0.01551	0.02386	0.02984	0.03453	0.03853	0.04078	0.04225	0.04274	0.04273	0.04245	0.03614
479.672	0.01573	0.02402	0.02995	0.03458	0.03853	0.04074	0.04216	0.04261	0.04256	0.04223	0.0359
479.882	0.01595	0.02417	0.03005	0.03464	0.03853	0.0407	0.04207	0.04248	0.0424	0.04202	0.03566
480.091	0.01617	0.02433	0.03016	0.03469	0.03853	0.04066	0.04199	0.04236	0.04224	0.04182	0.03543
480.301	0.01639	0.02449	0.03027	0.03475	0.03853	0.04062	0.0419	0.04223	0.04208	0.04161	0.0352
480.51	0.01661	0.02465	0.03038	0.03481	0.03854	0.04059	0.04182	0.04211	0.04192	0.04141	0.03497
480.72	0.01683	0.02481	0.03049	0.03487	0.03854	0.04056	0.04175	0.04199	0.04177	0.04122	0.03475
480.93	0.01705	0.02496	0.0306	0.03492	0.03855	0.04053	0.04167	0.04188	0.04162	0.04102	0.03453
481.139	0.01727	0.02512	0.03071	0.03498	0.03855	0.0405	0.0416	0.04176	0.04148	0.04083	0.03432
481.349	0.01749	0.02528	0.03082	0.03505	0.03856	0.04048	0.04153	0.04166	0.04134	0.04065	0.03411
481.558	0.01771	0.02545	0.03094	0.03511	0.03858	0.04045	0.04146	0.04155	0.0412	0.04046	0.0339
481.768	0.01793	0.02561	0.03105	0.03517	0.03859	0.04043	0.04139	0.04145	0.04107	0.04029	0.0337
481.977	0.01815	0.02577	0.03117	0.03524	0.03861	0.04042	0.04133	0.04135	0.04094	0.04011	0.0335
482.187	0.01837	0.02594	0.03129	0.03531	0.03862	0.0404	0.04127	0.04125	0.04081	0.03994	0.03331
482.396	0.01859	0.0261	0.03141	0.03538	0.03864	0.04039	0.04122	0.04116	0.04069	0.03978	0.03312
482.606	0.01882	0.02627	0.03153	0.03545	0.03867	0.04038	0.04116	0.04107	0.04057	0.03962	0.03293
482.815	0.01904	0.02644	0.03165	0.03552	0.03869	0.04037	0.04111	0.04098	0.04045	0.03946	0.03275
483.024	0.01926	0.02661	0.03177	0.03559	0.03872	0.04037	0.04107	0.04089	0.04034	0.0393	0.03258
483.234	0.01948	0.02678	0.0319	0.03567	0.03874	0.04037	0.04102	0.04081	0.04023	0.03915	0.0324
483.443	0.01971	0.02695	0.03202	0.03575	0.03877	0.04037	0.04098	0.04073	0.04012	0.03901	0.03223
483.653	0.01993	0.02712	0.03215	0.03583	0.03881	0.04037	0.04094	0.04066	0.04002	0.03886	0.03207
483.862	0.02015	0.02729	0.03227	0.03591	0.03884	0.04037	0.0409	0.04059	0.03992	0.03872	0.03191
484.071	0.02038	0.02747	0.0324	0.03599	0.03888	0.04038	0.04087	0.04052	0.03982	0.03859	0.03175
484.281	0.0206	0.02765	0.03253	0.03607	0.03892	0.04039	0.04084	0.04045	0.03973	0.03845	0.03159
484.49	0.02083	0.02782	0.03267	0.03616	0.03896	0.0404	0.04081	0.04039	0.03964	0.03833	0.03145
484.699	0.02106	0.028	0.0328	0.03625	0.039	0.04042	0.04078	0.04033	0.03955	0.0382	0.0313
484.908	0.02129	0.02819	0.03294	0.03634	0.03905	0.04044	0.04076	0.04028	0.03947	0.03808	0.03116
485.118	0.02152	0.02837	0.03308	0.03644	0.0391	0.04046	0.04074	0.04023	0.03939	0.03797	0.03103
485.327	0.02175	0.02856	0.03322	0.03654	0.03916	0.04048	0.04073	0.04018	0.03932	0.03786	0.0309
485.536	0.02199	0.02875	0.03336	0.03664	0.03921	0.04051	0.04072	0.04014	0.03925	0.03776	0.03077
485.745	0.02223	0.02894	0.03351	0.03674	0.03927	0.04054	0.04071	0.04011	0.03919	0.03766	0.03065
485.954	0.02246	0.02914	0.03366	0.03685	0.03934	0.04058	0.04071	0.04007	0.03913	0.03756	0.03053
486.163	0.0227	0.02933	0.03381	0.03696	0.03941	0.04062	0.04071	0.04004	0.03907	0.03747	0.03042
486.373	0.02294	0.02953	0.03396	0.03707	0.03947	0.04065	0.04071	0.04002	0.03902	0.03738	0.03031
486.582	0.02319	0.02973	0.03411	0.03719	0.03954	0.0407	0.04072	0.03999	0.03897	0.0373	0.0302
486.791	0.02343	0.02993	0.03427	0.0373	0.03962	0.04074	0.04073	0.03997	0.03892	0.03722	0.0301
487	0.02367	0.03013	0.03442	0.03742	0.03969	0.04078	0.04074	0.03996	0.03888	0.03714	0.03
487.209	0.02391	0.03033	0.03458	0.03754	0.03977	0.04083	0.04075	0.03994	0.03884	0.03707	0.0299
487.418	0.02416	0.03053	0.03474	0.03766	0.03985	0.04088	0.04076	0.03993	0.0388	0.037	0.02981
487.627	0.0244	0.03073	0.0349	0.03778	0.03993	0.04093	0.04078	0.03992	0.03876	0.03693	0.02972
487.836	0.02465	0.03094	0.03506	0.0379	0.04001	0.04098	0.0408	0.03991	0.03873	0.03686	0.02963
488.045	0.02489	0.03114	0.03522	0.03803	0.0401	0.04104	0.04082	0.03991	0.0387	0.0368	0.02955
488.254	0.02514	0.03135	0.03539	0.03816	0.04019	0.04109	0.04085	0.03991	0.03867	0.03675	0.02947
488.463	0.02539	0.03156	0.03555	0.03829	0.04028	0.04115	0.04088	0.03991	0.03864	0.03669	0.02939
488.672	0.02564	0.03177	0.03572	0.03842	0.04037	0.04122	0.04091	0.03992	0.03862	0.03664	0.02932
488.881	0.02589	0.03198	0.03589	0.03856	0.04047	0.04128	0.04095	0.03993	0.03861	0.0366	0.02926
489.09	0.02614	0.03219	0.03607	0.0387	0.04056	0.04135	0.04099	0.03994	0.03859	0.03656	0.02919
489.299	0.0264	0.03241	0.03624	0.03884	0.04067	0.04142	0.04103	0.03996	0.03858	0.03652	0.02913
489.508	0.02666	0.03263	0.03642	0.03898	0.04077	0.0415	0.04107	0.03998	0.03858	0.03649	0.02908
489.716	0.02692	0.03285	0.0366	0.03913	0.04088	0.04158	0.04112	0.04	0.03858	0.03646	0.02903
489.925	0.02718	0.03307	0.03678	0.03928	0.04099	0.04166	0.04117	0.04003	0.03858	0.03644	0.02898
490.134	0.02744	0.0333	0.03697	0.03943	0.0411	0.04174	0.04123	0.04006	0.03858	0.03641	0.02893
490.343	0.0277	0.03352	0.03715	0.03958	0.04122	0.04183	0.04129	0.04009	0.03859	0.0364	0.02889
490.552	0.02797	0.03375	0.03734	0.03973	0.04133	0.04191	0.04135	0.04013	0.0386	0.03638	0.02886
490.761	0.02823	0.03398	0.03753	0.03989	0.04145	0.042	0.04141	0.04017	0.03861	0.03637	0.02882
490.969	0.0285	0.03421	0.03772	0.04005	0.04158	0.0421	0.04148	0.04021	0.03863	0.03637	0.02879
491.178	0.02877	0.03444	0.03791	0.04021	0.0417	0.04219	0.04155	0.04026	0.03865	0.03636	0.02877
491.387	0.02904	0.03467	0.03811	0.04037	0.04183	0.04229	0.04162	0.0403	0.03867	0.03636	0.02874
491.596	0.02931	0.03491	0.0383	0.04054	0.04195	0.04239	0.04169	0.04035	0.03869	0.03636	0.02873
491.804	0.02958	0.03514	0.0385	0.04071	0.04209	0.04249	0.04177	0.04041	0.03872	0.03637	0.02871
492.013	0.02985	0.03538	0.0387	0.04088	0.04222	0.0426	0.04185	0.04046	0.03876	0.03638	0.0287
492.222	0.03013	0.03562	0.0389	0.04105	0.04235	0.04271	0.04194	0.04052	0.03879	0.03639	0.02869
492.43	0.0304	0.03586	0.03911	0.04122	0.04249	0.04282	0.04202	0.04058	0.03883	0.03641	0.02868
492.639	0.03068	0.0361	0.03931	0.04139	0.04263	0.04293	0.04211	0.04065	0.03887	0.03643	0.02868
492.847	0.03096	0.03634	0.03952	0.04157	0.04277	0.04304	0.0422	0.04072	0.03891	0.03645	0.02868
493.056	0.03124	0.03659	0.03973	0.04175	0.04292	0.04316	0.0423	0.04079	0.03896	0.03648	0.02868
493.265	0.03153	0.03683	0.03994	0.04193	0.04307	0.04328	0.04239	0.04086	0.03901	0.03651	0.02869
493.473	0.03181	0.03708	0.04016	0.04212	0.04322	0.0434	0.04249	0.04094	0.03906	0.03654	0.0287
493.682	0.0321	0.03733	0.04037	0.0423	0.04337	0.04353	0.0426	0.04102	0.03912	0.03658	0.02872
493.89	0.03239	0.03759	0.0406	0.04249	0.04353	0.04366	0.04271	0.0411	0.03918	0.03662	0.02874
494.099	0.03268	0.03784	0.04082	0.04268	0.04369	0.04379	0.04282	0.04119	0.03925	0.03666	0.02877
494.307	0.03298	0.0381	0.04104	0.04288	0.04385	0.04393	0.04293	0.04128	0.03932	0.03671	0.0288
494.516	0.03327	0.03836	0.04127	0.04308	0.04402	0.04407	0.04305	0.04138	0.03939	0.03677	0.02883
494.724	0.03358	0.03863	0.04151	0.04328	0.04419	0.04421	0.04318	0.04148	0.03947	0.03683	0.02887
494.933	0.03388	0.0389	0.04174	0.04349	0.04437	0.04436	0.0433	0.04159	0.03955	0.03689	0.02891
495.141	0.03419	0.03917	0.04198	0.0437	0.04455	0.04452	0.04344	0.0417	0.03964	0.03696	0.02896
495.349	0.0345	0.03944	0.04223	0.04391	0.04473	0.04467	0.04357	0.04181	0.03973	0.03703	0.02901
495.558	0.03481	0.03972	0.04247	0.04413	0.04492	0.04483	0.04371	0.04193	0.03983	0.03711	0.02907
495.766	0.03513	0.04	0.04273	0.04435	0.04511	0.045	0.04386	0.04205	0.03993	0.03719	0.02914
495.975	0.03545	0.04029	0.04298	0.04457	0.04531	0.04517	0.04401	0.04218	0.04004	0.03728	0.02921
496.183	0.03577	0.04058	0.04324	0.0448	0.04551	0.04534	0.04416	0.04231	0.04015	0.03738	0.02928
496.391	0.0361	0.04088	0.0435	0.04503	0.04572	0.04552	0.04432	0.04245	0.04027	0.03748	0.02936
496.6	0.03644	0.04117	0.04377	0.04527	0.04593	0.04571	0.04449	0.0426	0.04039	0.03758	0.02945
496.808	0.03677	0.04147	0.04404	0.04551	0.04614	0.0459	0.04466	0.04274	0.04052	0.03769	0.02954
497.016	0.03711	0.04178	0.04432	0.04576	0.04636	0.04609	0.04483	0.0429	0.04065	0.03781	0.02964
497.224	0.03746	0.04209	0.0446	0.04601	0.04659	0.04629	0.04501	0.04305	0.04079	0.03792	0.02974
497.433	0.0378	0.0424	0.04488	0.04626	0.04681	0.04649	0.04519	0.04322	0.04093	0.03805	0.02985
497.641	0.03815	0.04272	0.04516	0.04652	0.04704	0.0467	0.04538	0.04338	0.04108	0.03818	0.02996
497.849	0.03851	0.04303	0.04545	0.04678	0.04728	0.0469	0.04557	0.04355	0.04123	0.03831	0.03008
498.057	0.03886	0.04335	0.04574	0.04704	0.04752	0.04712	0.04576	0.04373	0.04138	0.03845	0.0302
498.265	0.03922	0.04368	0.04604	0.0473	0.04776	0.04733	0.04596	0.0439	0.04154	0.03859	0.03032
498.474	0.03958	0.044	0.04633	0.04757	0.048	0.04755	0.04616	0.04408	0.0417	0.03873	0.03045
498.682	0.03994	0.04433	0.04663	0.04784	0.04825	0.04777	0.04636	0.04427	0.04187	0.03888	0.03059
498.89	0.04031	0.04466	0.04693	0.04811	0.04849	0.048	0.04656	0.04445	0.04203	0.03903	0.03072
499.098	0.04067	0.04499	0.04723	0.04839	0.04875	0.04822	0.04677	0.04464	0.0422	0.03918	0.03086
499.306	0.04104	0.04532	0.04754	0.04866	0.049	0.04845	0.04698	0.04483	0.04238	0.03934	0.031
499.514	0.04141	0.04565	0.04784	0.04894	0.04925	0.04868	0.04719	0.04503	0.04255	0.0395	0.03115
499.722	0.04178	0.04599	0.04815	0.04922	0.04951	0.04891	0.0474	0.04522	0.04273	0.03966	0.03129
499.93	0.04215	0.04632	0.04845	0.0495	0.04977	0.04915	0.04762	0.04542	0.04291	0.03982	0.03145
500.138	0.04252	0.04666	0.04876	0.04979	0.05003	0.04939	0.04783	0.04562	0.04309	0.03999	0.0316
500.346	0.0429	0.047	0.04908	0.05007	0.05029	0.04963	0.04805	0.04583	0.04328	0.04016	0.03176
500.554	0.04327	0.04734	0.04939	0.05036	0.05056	0.04987	0.04827	0.04603	0.04347	0.04033	0.03192
500.762	0.04365	0.04768	0.0497	0.05065	0.05082	0.05011	0.0485	0.04624	0.04366	0.0405	0.03208
500.97	0.04402	0.04802	0.05002	0.05093	0.05109	0.05036	0.04872	0.04645	0.04385	0.04068	0.03225
501.178	0.0444	0.04837	0.05033	0.05123	0.05136	0.0506	0.04895	0.04666	0.04405	0.04086	0.03241
501.386	0.04478	0.04871	0.05065	0.05152	0.05163	0.05085	0.04918	0.04687	0.04424	0.04104	0.03259
501.594	0.04516	0.04906	0.05097	0.05181	0.0519	0.0511	0.04941	0.04709	0.04444	0.04123	0.03276
501.802	0.04554	0.04941	0.05129	0.05211	0.05217	0.05135	0.04964	0.04731	0.04465	0.04141	0.03293
502.01	0.04593	0.04975	0.05161	0.0524	0.05245	0.05161	0.04987	0.04753	0.04485	0.0416	0.03311
502.218	0.04631	0.0501	0.05193	0.0527	0.05273	0.05186	0.05011	0.04775	0.04505	0.04179	0.03329
502.425	0.04669	0.05045	0.05225	0.053	0.053	0.05212	0.05034	0.04797	0.04526	0.04198	0.03348
502.633	0.04708	0.0508	0.05258	0.0533	0.05328	0.05238	0.05058	0.0482	0.04547	0.04218	0.03366
502.841	0.04746	0.05115	0.0529	0.0536	0.05356	0.05264	0.05082	0.04843	0.04568	0.04238	0.03385
503.049	0.04785	0.05151	0.05323	0.0539	0.05385	0.0529	0.05107	0.04866	0.04589	0.04257	0.03404
503.257	0.04823	0.05186	0.05356	0.05421	0.05413	0.05316	0.05131	0.04889	0.04611	0.04278	0.03423
503.464	0.04862	0.05221	0.05388	0.05451	0.05441	0.05343	0.05155	0.04912	0.04633	0.04298	0.03442
503.672	0.04901	0.05257	0.05421	0.05482	0.05469	0.05369	0.0518	0.04935	0.04654	0.04318	0.03462
503.88	0.0494	0.05292	0.05454	0.05512	0.05498	0.05396	0.05205	0.04959	0.04676	0.04339	0.03481
504.088	0.04978	0.05328	0.05487	0.05543	0.05526	0.05422	0.05229	0.04982	0.04698	0.0436	0.03501
504.295	0.05017	0.05363	0.0552	0.05574	0.05555	0.05449	0.05254	0.05006	0.04721	0.04381	0.03521
504.503	0.05056	0.05399	0.05553	0.05604	0.05584	0.05476	0.05279	0.0503	0.04743	0.04402	0.03541
504.711	0.05095	0.05434	0.05586	0.05635	0.05612	0.05503	0.05304	0.05054	0.04765	0.04423	0.03561
504.918	0.05133	0.0547	0.05619	0.05666	0.05641	0.0553	0.05329	0.05078	0.04788	0.04445	0.03582
505.126	0.05172	0.05505	0.05652	0.05696	0.05669	0.05557	0.05354	0.05102	0.0481	0.04466	0.03602
505.333	0.0521	0.05541	0.05685	0.05727	0.05698	0.05584	0.0538	0.05126	0.04833	0.04488	0.03622
505.541	0.05249	0.05576	0.05718	0.05758	0.05727	0.0561	0.05405	0.0515	0.04856	0.04509	0.03643
505.749	0.05287	0.05612	0.05751	0.05789	0.05755	0.05637	0.0543	0.05174	0.04879	0.04531	0.03663
505.956	0.05326	0.05647	0.05784	0.05819	0.05784	0.05664	0.05455	0.05198	0.04902	0.04553	0.03684
506.164	0.05364	0.05682	0.05817	0.0585	0.05812	0.05691	0.05481	0.05222	0.04925	0.04575	0.03705
506.371	0.05402	0.05718	0.0585	0.05881	0.05841	0.05719	0.05506	0.05246	0.04948	0.04597	0.03726
506.579	0.05441	0.05753	0.05883	0.05912	0.0587	0.05746	0.05532	0.05271	0.04971	0.04619	0.03747
506.786	0.05479	0.05788	0.05916	0.05943	0.05898	0.05773	0.05557	0.05295	0.04994	0.04641	0.03768
506.994	0.05517	0.05824	0.05949	0.05973	0.05927	0.058	0.05583	0.0532	0.05018	0.04664	0.03789
507.201	0.05555	0.05859	0.05982	0.06004	0.05956	0.05827	0.05609	0.05344	0.05041	0.04687	0.0381
507.409	0.05593	0.05894	0.06015	0.06035	0.05984	0.05855	0.05635	0.05369	0.05065	0.04709	0.03832
507.616	0.05632	0.0593	0.06048	0.06066	0.06013	0.05882	0.05661	0.05394	0.05089	0.04732	0.03853
507.823	0.0567	0.05965	0.06081	0.06097	0.06042	0.0591	0.05687	0.05419	0.05112	0.04756	0.03875
508.031	0.05708	0.06001	0.06115	0.06128	0.06071	0.05937	0.05713	0.05444	0.05136	0.04779	0.03897
508.238	0.05746	0.06036	0.06148	0.0616	0.061	0.05965	0.05739	0.05469	0.05161	0.04802	0.03919
508.445	0.05784	0.06071	0.06181	0.06191	0.06129	0.05993	0.05765	0.05494	0.05185	0.04826	0.03941
508.653	0.05822	0.06107	0.06214	0.06222	0.06158	0.0602	0.05792	0.05519	0.05209	0.04849	0.03963
508.86	0.05859	0.06142	0.06247	0.06253	0.06187	0.06048	0.05818	0.05544	0.05233	0.04873	0.03985
509.067	0.05897	0.06177	0.0628	0.06284	0.06216	0.06076	0.05845	0.05569	0.05258	0.04897	0.04007
509.275	0.05935	0.06212	0.06313	0.06315	0.06245	0.06104	0.05871	0.05595	0.05282	0.04921	0.0403
509.482	0.05972	0.06248	0.06347	0.06346	0.06274	0.06131	0.05898	0.0562	0.05307	0.04945	0.04052
509.689	0.0601	0.06283	0.0638	0.06377	0.06303	0.06159	0.05925	0.05646	0.05331	0.04969	0.04075
509.896	0.06047	0.06318	0.06413	0.06409	0.06332	0.06187	0.05951	0.05671	0.05356	0.04993	0.04097
510.104	0.06085	0.06353	0.06446	0.0644	0.06361	0.06215	0.05978	0.05697	0.05381	0.05018	0.0412
510.311	0.06122	0.06388	0.06479	0.06471	0.0639	0.06243	0.06005	0.05723	0.05406	0.05042	0.04143
510.518	0.06159	0.06423	0.06512	0.06502	0.0642	0.06271	0.06032	0.05749	0.05431	0.05067	0.04166
510.725	0.06196	0.06458	0.06545	0.06533	0.06449	0.06299	0.06059	0.05774	0.05456	0.05091	0.04189
510.932	0.06233	0.06493	0.06578	0.06565	0.06478	0.06327	0.06086	0.058	0.05481	0.05116	0.04213
511.14	0.0627	0.06528	0.06611	0.06596	0.06507	0.06355	0.06114	0.05827	0.05506	0.05141	0.04236
511.347	0.06307	0.06562	0.06643	0.06627	0.06537	0.06384	0.06141	0.05853	0.05532	0.05166	0.0426
511.554	0.06344	0.06597	0.06676	0.06658	0.06566	0.06412	0.06168	0.05879	0.05557	0.05191	0.04283
511.761	0.06381	0.06632	0.06709	0.0669	0.06596	0.0644	0.06196	0.05906	0.05583	0.05217	0.04307
511.968	0.06418	0.06667	0.06743	0.06721	0.06626	0.06469	0.06224	0.05932	0.05609	0.05242	0.04331
512.175	0.06455	0.06702	0.06776	0.06753	0.06655	0.06498	0.06252	0.05959	0.05635	0.05268	0.04356
512.382	0.06492	0.06737	0.06809	0.06784	0.06685	0.06526	0.0628	0.05986	0.05661	0.05294	0.0438
512.589	0.0653	0.06772	0.06842	0.06816	0.06715	0.06555	0.06308	0.06013	0.05687	0.0532	0.04405
512.796	0.06567	0.06807	0.06875	0.06848	0.06746	0.06584	0.06336	0.0604	0.05714	0.05346	0.0443
513.003	0.06604	0.06843	0.06909	0.0688	0.06776	0.06613	0.06365	0.06068	0.05741	0.05373	0.04455
513.21	0.06641	0.06878	0.06942	0.06912	0.06806	0.06643	0.06394	0.06096	0.05768	0.054	0.04481
513.417	0.06678	0.06913	0.06976	0.06944	0.06837	0.06672	0.06423	0.06124	0.05795	0.05427	0.04507
513.624	0.06716	0.06949	0.0701	0.06977	0.06868	0.06702	0.06452	0.06152	0.05823	0.05454	0.04533
513.831	0.06753	0.06984	0.07043	0.07009	0.06899	0.06732	0.06481	0.0618	0.05851	0.05481	0.04559
514.038	0.06791	0.0702	0.07077	0.07042	0.0693	0.06762	0.06511	0.06209	0.05879	0.05509	0.04586
514.245	0.06828	0.07055	0.07111	0.07074	0.06961	0.06792	0.0654	0.06237	0.05907	0.05537	0.04612
514.451	0.06865	0.07091	0.07145	0.07107	0.06992	0.06822	0.0657	0.06266	0.05935	0.05565	0.04639
514.658	0.06903	0.07127	0.07179	0.0714	0.07024	0.06852	0.066	0.06295	0.05964	0.05593	0.04667
514.865	0.0694	0.07162	0.07213	0.07172	0.07055	0.06883	0.0663	0.06324	0.05992	0.05621	0.04694
515.072	0.06978	0.07198	0.07247	0.07205	0.07087	0.06913	0.0666	0.06354	0.06021	0.0565	0.04722
515.279	0.07015	0.07233	0.07281	0.07238	0.07118	0.06944	0.0669	0.06383	0.0605	0.05678	0.04749
515.485	0.07052	0.07269	0.07316	0.07271	0.0715	0.06974	0.06721	0.06413	0.06079	0.05707	0.04777
515.692	0.0709	0.07305	0.0735	0.07304	0.07182	0.07005	0.06751	0.06443	0.06109	0.05736	0.04806
515.899	0.07127	0.0734	0.07384	0.07337	0.07214	0.07036	0.06782	0.06473	0.06138	0.05766	0.04834
516.106	0.07165	0.07376	0.07419	0.0737	0.07246	0.07067	0.06812	0.06503	0.06168	0.05795	0.04863
516.312	0.07202	0.07412	0.07453	0.07404	0.07278	0.07099	0.06843	0.06533	0.06198	0.05825	0.04892
516.519	0.0724	0.07448	0.07488	0.07437	0.0731	0.0713	0.06874	0.06564	0.06229	0.05855	0.04921
516.726	0.07277	0.07483	0.07522	0.0747	0.07342	0.07161	0.06905	0.06594	0.06259	0.05885	0.04951
516.932	0.07314	0.07519	0.07557	0.07503	0.07374	0.07193	0.06936	0.06625	0.06289	0.05915	0.0498
517.139	0.07352	0.07555	0.07591	0.07537	0.07407	0.07224	0.06968	0.06656	0.0632	0.05945	0.0501
517.346	0.07389	0.0759	0.07626	0.0757	0.07439	0.07256	0.06999	0.06687	0.06351	0.05976	0.0504
517.552	0.07426	0.07626	0.0766	0.07603	0.07472	0.07288	0.0703	0.06718	0.06382	0.06006	0.05071
517.759	0.07463	0.07662	0.07695	0.07637	0.07504	0.0732	0.07062	0.06749	0.06413	0.06037	0.05101
517.965	0.075	0.07697	0.0773	0.0767	0.07537	0.07352	0.07093	0.06781	0.06445	0.06068	0.05132
518.172	0.07538	0.07733	0.07764	0.07704	0.0757	0.07384	0.07125	0.06812	0.06476	0.06099	0.05163
518.379	0.07575	0.07769	0.07799	0.07737	0.07602	0.07416	0.07157	0.06844	0.06508	0.06131	0.05194
518.585	0.07612	0.07804	0.07834	0.07771	0.07635	0.07449	0.07189	0.06876	0.0654	0.06163	0.05226
518.792	0.07649	0.0784	0.07869	0.07805	0.07668	0.07481	0.07221	0.06908	0.06573	0.06195	0.05258
518.998	0.07687	0.07876	0.07904	0.07839	0.07702	0.07514	0.07254	0.06941	0.06605	0.06227	0.0529
519.205	0.07724	0.07912	0.07939	0.07873	0.07735	0.07547	0.07286	0.06973	0.06638	0.06259	0.05322
519.411	0.07761	0.07948	0.07975	0.07907	0.07769	0.0758	0.07319	0.07006	0.06671	0.06292	0.05355
519.618	0.07798	0.07984	0.0801	0.07941	0.07802	0.07613	0.07352	0.07039	0.06705	0.06325	0.05388
519.824	0.07836	0.0802	0.08045	0.07975	0.07836	0.07647	0.07385	0.07072	0.06738	0.06358	0.05421
520.03	0.07873	0.08056	0.08081	0.0801	0.0787	0.0768	0.07418	0.07106	0.06772	0.06392	0.05455
520.237	0.07911	0.08092	0.08116	0.08044	0.07903	0.07714	0.07451	0.07139	0.06806	0.06426	0.05489
520.443	0.07948	0.08128	0.08152	0.08078	0.07938	0.07748	0.07484	0.07173	0.0684	0.0646	0.05523
520.649	0.07985	0.08165	0.08188	0.08113	0.07972	0.07782	0.07518	0.07207	0.06874	0.06494	0.05557
520.856	0.08023	0.08201	0.08224	0.08148	0.08006	0.07816	0.07552	0.07242	0.06909	0.06528	0.05592
521.062	0.0806	0.08237	0.08259	0.08183	0.08041	0.0785	0.07586	0.07276	0.06944	0.06563	0.05627
521.268	0.08098	0.08274	0.08295	0.08218	0.08075	0.07885	0.0762	0.07311	0.06979	0.06598	0.05662
521.475	0.08135	0.0831	0.08332	0.08253	0.0811	0.0792	0.07655	0.07346	0.07015	0.06634	0.05698
521.681	0.08173	0.08347	0.08368	0.08288	0.08145	0.07955	0.07689	0.07381	0.0705	0.06669	0.05734
521.887	0.08211	0.08384	0.08404	0.08323	0.0818	0.0799	0.07724	0.07416	0.07086	0.06705	0.0577
522.094	0.08248	0.0842	0.0844	0.08359	0.08215	0.08025	0.07759	0.07452	0.07123	0.06741	0.05806
522.3	0.08286	0.08457	0.08477	0.08395	0.08251	0.08061	0.07795	0.07488	0.07159	0.06778	0.05843
522.506	0.08324	0.08494	0.08514	0.0843	0.08286	0.08096	0.0783	0.07524	0.07196	0.06815	0.0588
522.712	0.08362	0.08531	0.0855	0.08466	0.08322	0.08132	0.07866	0.07561	0.07233	0.06852	0.05918
522.918	0.084	0.08568	0.08587	0.08502	0.08358	0.08168	0.07902	0.07597	0.0727	0.06889	0.05955
523.124	0.08437	0.08606	0.08624	0.08538	0.08394	0.08204	0.07938	0.07634	0.07308	0.06927	0.05993
523.331	0.08475	0.08643	0.08661	0.08575	0.0843	0.08241	0.07974	0.07671	0.07345	0.06964	0.06032
523.537	0.08513	0.0868	0.08698	0.08611	0.08467	0.08277	0.08011	0.07708	0.07383	0.07002	0.0607
523.743	0.08551	0.08717	0.08735	0.08647	0.08503	0.08314	0.08048	0.07746	0.07422	0.07041	0.06109
523.949	0.08589	0.08754	0.08772	0.08683	0.08539	0.08351	0.08085	0.07783	0.0746	0.07079	0.06148
524.155	0.08627	0.08792	0.08809	0.0872	0.08576	0.08387	0.08122	0.07821	0.07498	0.07118	0.06188
524.361	0.08664	0.08829	0.08845	0.08756	0.08612	0.08424	0.08159	0.07859	0.07537	0.07157	0.06227
524.567	0.08702	0.08866	0.08882	0.08793	0.08649	0.08461	0.08196	0.07897	0.07576	0.07196	0.06267
524.773	0.0874	0.08903	0.08919	0.08829	0.08686	0.08499	0.08233	0.07935	0.07615	0.07235	0.06307
524.979	0.08777	0.0894	0.08956	0.08866	0.08723	0.08536	0.08271	0.07973	0.07654	0.07275	0.06347
525.185	0.08815	0.08977	0.08993	0.08903	0.0876	0.08573	0.08309	0.08012	0.07693	0.07314	0.06388
525.391	0.08852	0.09014	0.0903	0.08939	0.08797	0.08611	0.08346	0.0805	0.07733	0.07354	0.06428
525.597	0.0889	0.09051	0.09067	0.08976	0.08833	0.08648	0.08384	0.08089	0.07772	0.07394	0.06469
525.803	0.08927	0.09088	0.09104	0.09012	0.0887	0.08686	0.08422	0.08128	0.07812	0.07434	0.0651
526.009	0.08964	0.09125	0.0914	0.09049	0.08907	0.08723	0.0846	0.08167	0.07852	0.07475	0.06551
526.215	0.09001	0.09161	0.09177	0.09085	0.08944	0.08761	0.08498	0.08206	0.07892	0.07515	0.06593
526.421	0.09037	0.09198	0.09213	0.09122	0.08981	0.08798	0.08537	0.08244	0.07932	0.07556	0.06634
526.627	0.09074	0.09234	0.09249	0.09158	0.09018	0.08836	0.08575	0.08283	0.07972	0.07596	0.06676
526.832	0.09111	0.0927	0.09286	0.09195	0.09055	0.08873	0.08613	0.08323	0.08012	0.07637	0.06718
527.038	0.09147	0.09306	0.09322	0.09231	0.09092	0.08911	0.08651	0.08362	0.08052	0.07678	0.06759
527.244	0.09183	0.09342	0.09358	0.09267	0.09129	0.08949	0.0869	0.08401	0.08092	0.07719	0.06801
527.45	0.09219	0.09378	0.09393	0.09303	0.09165	0.08986	0.08728	0.0844	0.08132	0.0776	0.06844
527.656	0.09255	0.09414	0.09429	0.09339	0.09202	0.09024	0.08766	0.08479	0.08173	0.07801	0.06886
527.861	0.0929	0.09449	0.09465	0.09375	0.09239	0.09061	0.08805	0.08518	0.08213	0.07843	0.06928
528.067	0.09325	0.09484	0.095	0.09411	0.09275	0.09099	0.08843	0.08557	0.08253	0.07884	0.06971
528.273	0.0936	0.09519	0.09535	0.09446	0.09311	0.09136	0.08881	0.08596	0.08294	0.07925	0.07013
528.479	0.09395	0.09554	0.0957	0.09482	0.09348	0.09173	0.0892	0.08635	0.08334	0.07967	0.07056
528.684	0.0943	0.09588	0.09605	0.09517	0.09384	0.0921	0.08958	0.08674	0.08375	0.08008	0.07098
528.89	0.09464	0.09623	0.09639	0.09553	0.0942	0.09248	0.08996	0.08713	0.08415	0.0805	0.07141
529.096	0.09498	0.09657	0.09673	0.09588	0.09456	0.09285	0.09034	0.08752	0.08455	0.08091	0.07184
529.301	0.09532	0.09691	0.09708	0.09623	0.09492	0.09322	0.09073	0.08791	0.08496	0.08133	0.07227
529.507	0.09566	0.09724	0.09742	0.09658	0.09528	0.09359	0.09111	0.0883	0.08536	0.08175	0.0727
529.713	0.09599	0.09758	0.09775	0.09692	0.09563	0.09395	0.09149	0.08869	0.08577	0.08216	0.07313
529.918	0.09632	0.09791	0.09809	0.09727	0.09599	0.09432	0.09187	0.08908	0.08617	0.08258	0.07356
530.124	0.09665	0.09824	0.09842	0.09761	0.09634	0.09469	0.09225	0.08947	0.08658	0.083	0.07399
530.329	0.09698	0.09856	0.09875	0.09795	0.09669	0.09505	0.09263	0.08986	0.08698	0.08341	0.07442
530.535	0.0973	0.09889	0.09908	0.09829	0.09704	0.09542	0.093	0.09024	0.08738	0.08383	0.07485
530.741	0.09762	0.09921	0.0994	0.09863	0.09739	0.09578	0.09338	0.09063	0.08779	0.08425	0.07528
530.946	0.09793	0.09952	0.09972	0.09897	0.09774	0.09614	0.09375	0.09101	0.08819	0.08467	0.07571
531.152	0.09824	0.09984	0.10004	0.0993	0.09808	0.0965	0.09413	0.0914	0.08859	0.08508	0.07614
531.357	0.09855	0.10015	0.10036	0.09963	0.09842	0.09685	0.0945	0.09178	0.08899	0.0855	0.07657
531.562	0.09886	0.10046	0.10067	0.09996	0.09876	0.09721	0.09487	0.09216	0.08939	0.08592	0.077
531.768	0.09916	0.10076	0.10099	0.10029	0.0991	0.09756	0.09524	0.09255	0.08979	0.08633	0.07743
531.973	0.09946	0.10107	0.10129	0.10061	0.09944	0.09791	0.09561	0.09293	0.09019	0.08675	0.07787
532.179	0.09976	0.10137	0.1016	0.10093	0.09977	0.09826	0.09598	0.09331	0.09059	0.08717	0.0783
532.384	0.10005	0.10166	0.1019	0.10125	0.1001	0.09861	0.09634	0.09368	0.09099	0.08758	0.07873
532.59	0.10034	0.10196	0.10221	0.10157	0.10043	0.09896	0.09671	0.09406	0.09139	0.088	0.07916
532.795	0.10062	0.10225	0.10251	0.10189	0.10076	0.09931	0.09707	0.09444	0.09179	0.08842	0.07959
533	0.10091	0.10254	0.1028	0.10221	0.10109	0.09965	0.09744	0.09482	0.09219	0.08884	0.08003
533.206	0.10119	0.10283	0.1031	0.10252	0.10142	0.1	0.0978	0.0952	0.09259	0.08926	0.08046
533.411	0.10147	0.10311	0.10339	0.10283	0.10175	0.10034	0.09816	0.09558	0.09299	0.08967	0.0809
533.616	0.10174	0.10339	0.10369	0.10315	0.10207	0.10068	0.09852	0.09596	0.09339	0.09009	0.08133
533.822	0.10202	0.10367	0.10398	0.10346	0.10239	0.10103	0.09889	0.09634	0.09379	0.09052	0.08177
534.027	0.10229	0.10395	0.10427	0.10377	0.10272	0.10137	0.09925	0.09671	0.09419	0.09094	0.08221
534.232	0.10256	0.10423	0.10455	0.10407	0.10304	0.10171	0.09961	0.09709	0.09459	0.09136	0.08265
534.437	0.10282	0.10451	0.10484	0.10438	0.10336	0.10205	0.09997	0.09747	0.09499	0.09178	0.08309
534.642	0.10309	0.10478	0.10512	0.10469	0.10368	0.10239	0.10033	0.09785	0.0954	0.09221	0.08353
534.848	0.10335	0.10505	0.10541	0.10499	0.104	0.10273	0.10069	0.09823	0.0958	0.09263	0.08397
535.053	0.10361	0.10532	0.10569	0.10529	0.10432	0.10306	0.10105	0.09861	0.0962	0.09306	0.08441
535.258	0.10387	0.10559	0.10597	0.1056	0.10464	0.1034	0.10141	0.09899	0.09661	0.09349	0.08486
535.463	0.10412	0.10586	0.10625	0.1059	0.10495	0.10374	0.10177	0.09938	0.09701	0.09392	0.08531
535.668	0.10438	0.10613	0.10653	0.1062	0.10527	0.10408	0.10213	0.09976	0.09742	0.09435	0.08576
535.873	0.10463	0.10639	0.1068	0.1065	0.10559	0.10442	0.10249	0.10014	0.09783	0.09478	0.08621
536.079	0.10488	0.10666	0.10708	0.1068	0.10591	0.10476	0.10285	0.10053	0.09824	0.09522	0.08666
536.284	0.10513	0.10692	0.10736	0.1071	0.10622	0.1051	0.10322	0.10092	0.09865	0.09565	0.08711
536.489	0.10538	0.10718	0.10763	0.1074	0.10654	0.10543	0.10358	0.1013	0.09906	0.09609	0.08757
536.694	0.10562	0.10744	0.1079	0.1077	0.10686	0.10577	0.10394	0.10169	0.09947	0.09653	0.08802
536.899	0.10586	0.1077	0.10817	0.10799	0.10717	0.10611	0.1043	0.10208	0.09989	0.09697	0.08848
537.104	0.1061	0.10796	0.10844	0.10829	0.10749	0.10644	0.10466	0.10247	0.1003	0.09741	0.08894
537.309	0.10634	0.10821	0.10871	0.10858	0.10781	0.10678	0.10503	0.10286	0.10071	0.09786	0.08941
537.514	0.10658	0.10847	0.10898	0.10888	0.10812	0.10712	0.10539	0.10325	0.10113	0.0983	0.08987
537.719	0.10682	0.10872	0.10925	0.10917	0.10844	0.10746	0.10575	0.10364	0.10155	0.09875	0.09034
537.924	0.10705	0.10898	0.10952	0.10946	0.10876	0.10779	0.10612	0.10403	0.10197	0.09919	0.0908
538.129	0.10729	0.10923	0.10978	0.10976	0.10907	0.10813	0.10648	0.10443	0.10238	0.09964	0.09127
538.334	0.10752	0.10948	0.11005	0.11005	0.10939	0.10847	0.10685	0.10482	0.1028	0.10009	0.09174
538.538	0.10775	0.10973	0.11031	0.11034	0.1097	0.10881	0.10721	0.10522	0.10322	0.10054	0.09221
538.743	0.10797	0.10998	0.11058	0.11063	0.11002	0.10914	0.10757	0.10561	0.10365	0.101	0.09269
538.948	0.1082	0.11023	0.11084	0.11092	0.11033	0.10948	0.10794	0.10601	0.10407	0.10145	0.09316
539.153	0.10842	0.11047	0.1111	0.11121	0.11065	0.10982	0.10831	0.10641	0.10449	0.10191	0.09364
539.358	0.10865	0.11072	0.11136	0.1115	0.11096	0.11015	0.10867	0.10681	0.10492	0.10236	0.09412
539.563	0.10887	0.11096	0.11162	0.11179	0.11128	0.11049	0.10904	0.10721	0.10534	0.10282	0.0946
539.767	0.10909	0.11121	0.11188	0.11208	0.1116	0.11083	0.10941	0.10761	0.10577	0.10328	0.09508
539.972	0.10931	0.11145	0.11215	0.11236	0.11191	0.11117	0.10978	0.10801	0.1062	0.10375	0.09557
540.177	0.10953	0.11169	0.11241	0.11265	0.11223	0.11151	0.11015	0.10842	0.10663	0.10421	0.09606
540.382	0.10974	0.11194	0.11267	0.11294	0.11255	0.11185	0.11052	0.10883	0.10706	0.10468	0.09655
540.586	0.10996	0.11218	0.11293	0.11323	0.11287	0.11219	0.1109	0.10923	0.1075	0.10514	0.09704
540.791	0.11018	0.11242	0.11319	0.11352	0.11319	0.11253	0.11127	0.10964	0.10793	0.10561	0.09754
540.996	0.11039	0.11266	0.11345	0.11381	0.11351	0.11287	0.11165	0.11005	0.10837	0.10609	0.09803
541.201	0.1106	0.1129	0.11371	0.1141	0.11383	0.11322	0.11202	0.11046	0.10881	0.10656	0.09853
541.405	0.11082	0.11314	0.11397	0.11438	0.11415	0.11356	0.1124	0.11088	0.10925	0.10703	0.09903
541.61	0.11103	0.11338	0.11423	0.11467	0.11447	0.11391	0.11278	0.11129	0.10969	0.10751	0.09954
541.814	0.11124	0.11362	0.11449	0.11496	0.11479	0.11425	0.11316	0.11171	0.11013	0.10799	0.10004
542.019	0.11145	0.11386	0.11475	0.11525	0.11511	0.1146	0.11354	0.11212	0.11058	0.10847	0.10055
542.224	0.11165	0.11409	0.11501	0.11554	0.11544	0.11494	0.11392	0.11254	0.11102	0.10895	0.10106
542.428	0.11186	0.11433	0.11526	0.11583	0.11576	0.11529	0.1143	0.11296	0.11147	0.10943	0.10157
542.633	0.11207	0.11456	0.11552	0.11611	0.11608	0.11563	0.11468	0.11338	0.11192	0.10992	0.10208
542.837	0.11227	0.11479	0.11578	0.1164	0.1164	0.11598	0.11506	0.1138	0.11236	0.1104	0.1026
543.042	0.11247	0.11502	0.11603	0.11668	0.11672	0.11633	0.11544	0.11422	0.11281	0.11089	0.10311
543.246	0.11267	0.11525	0.11629	0.11697	0.11704	0.11667	0.11583	0.11464	0.11326	0.11138	0.10363
543.451	0.11287	0.11548	0.11654	0.11725	0.11736	0.11702	0.11621	0.11506	0.11371	0.11186	0.10415
543.655	0.11306	0.11571	0.11679	0.11754	0.11768	0.11736	0.11659	0.11548	0.11416	0.11235	0.10467
543.86	0.11326	0.11593	0.11704	0.11782	0.118	0.11771	0.11697	0.1159	0.11461	0.11284	0.10519
544.064	0.11345	0.11615	0.11729	0.1181	0.11832	0.11806	0.11736	0.11632	0.11507	0.11333	0.10571
544.269	0.11364	0.11638	0.11754	0.11838	0.11864	0.1184	0.11774	0.11674	0.11552	0.11382	0.10623
544.473	0.11383	0.1166	0.11779	0.11866	0.11895	0.11875	0.11812	0.11716	0.11597	0.11431	0.10676
544.677	0.11402	0.11681	0.11804	0.11894	0.11927	0.11909	0.1185	0.11759	0.11643	0.11481	0.10728
544.882	0.1142	0.11703	0.11828	0.11922	0.11959	0.11944	0.11889	0.11801	0.11688	0.1153	0.10781
545.086	0.11439	0.11725	0.11853	0.1195	0.1199	0.11978	0.11927	0.11843	0.11734	0.1158	0.10834
545.291	0.11457	0.11746	0.11877	0.11978	0.12022	0.12013	0.11965	0.11885	0.11779	0.11629	0.10886
545.495	0.11475	0.11767	0.11902	0.12005	0.12053	0.12047	0.12003	0.11927	0.11825	0.11679	0.10939
545.699	0.11493	0.11788	0.11926	0.12033	0.12085	0.12081	0.12042	0.1197	0.11871	0.11729	0.10993
545.903	0.11511	0.11809	0.1195	0.1206	0.12116	0.12116	0.1208	0.12012	0.11917	0.11778	0.11046
546.108	0.11528	0.1183	0.11974	0.12087	0.12147	0.1215	0.12118	0.12054	0.11963	0.11828	0.11099
546.312	0.11546	0.11851	0.11998	0.12115	0.12179	0.12185	0.12157	0.12097	0.12008	0.11878	0.11153
546.516	0.11563	0.11871	0.12021	0.12142	0.1221	0.12219	0.12195	0.12139	0.12055	0.11928	0.11206
546.72	0.1158	0.11892	0.12045	0.12169	0.12241	0.12254	0.12233	0.12182	0.12101	0.11978	0.1126
546.925	0.11597	0.11912	0.12069	0.12196	0.12273	0.12288	0.12272	0.12224	0.12147	0.12029	0.11314
547.129	0.11614	0.11932	0.12092	0.12223	0.12304	0.12322	0.1231	0.12267	0.12193	0.12079	0.11368
547.333	0.11631	0.11952	0.12116	0.1225	0.12335	0.12357	0.12349	0.1231	0.1224	0.1213	0.11422
547.537	0.11647	0.11972	0.12139	0.12277	0.12366	0.12391	0.12387	0.12352	0.12286	0.1218	0.11477
547.741	0.11664	0.11992	0.12162	0.12304	0.12397	0.12426	0.12426	0.12395	0.12333	0.12231	0.11531
547.945	0.1168	0.12011	0.12185	0.12331	0.12428	0.1246	0.12464	0.12438	0.12379	0.12282	0.11586
548.15	0.11696	0.12031	0.12208	0.12358	0.12459	0.12494	0.12503	0.1248	0.12426	0.12332	0.1164
548.354	0.11712	0.1205	0.12231	0.12384	0.1249	0.12529	0.12541	0.12523	0.12472	0.12383	0.11695
548.558	0.11727	0.12069	0.12253	0.1241	0.1252	0.12563	0.12579	0.12566	0.12519	0.12434	0.11749
548.762	0.11743	0.12088	0.12276	0.12437	0.12551	0.12597	0.12617	0.12608	0.12565	0.12485	0.11804
548.966	0.11758	0.12106	0.12298	0.12463	0.12581	0.12631	0.12656	0.12651	0.12612	0.12536	0.11859
549.17	0.11773	0.12125	0.1232	0.12489	0.12612	0.12665	0.12694	0.12693	0.12658	0.12587	0.11914
549.374	0.11787	0.12143	0.12342	0.12514	0.12642	0.12699	0.12732	0.12735	0.12705	0.12637	0.11968
549.578	0.11802	0.12161	0.12363	0.1254	0.12672	0.12733	0.1277	0.12778	0.12751	0.12688	0.12023
549.782	0.11816	0.12178	0.12384	0.12565	0.12702	0.12766	0.12807	0.1282	0.12798	0.12739	0.12078
549.986	0.11829	0.12195	0.12405	0.1259	0.12731	0.12799	0.12845	0.12862	0.12844	0.1279	0.12132
550.19	0.11843	0.12212	0.12426	0.12615	0.1276	0.12833	0.12882	0.12904	0.1289	0.1284	0.12187
550.394	0.11856	0.12229	0.12447	0.1264	0.1279	0.12866	0.12919	0.12945	0.12936	0.12891	0.12241
550.598	0.11869	0.12245	0.12467	0.12664	0.12818	0.12898	0.12956	0.12987	0.12982	0.12941	0.12295
550.801	0.11881	0.12261	0.12487	0.12688	0.12847	0.12931	0.12993	0.13028	0.13028	0.12991	0.12349
551.005	0.11894	0.12277	0.12506	0.12712	0.12875	0.12963	0.1303	0.13069	0.13073	0.13042	0.12403
551.209	0.11905	0.12292	0.12526	0.12735	0.12903	0.12995	0.13066	0.1311	0.13119	0.13092	0.12457
551.413	0.11917	0.12307	0.12545	0.12758	0.12931	0.13027	0.13102	0.13151	0.13164	0.13142	0.12511
551.617	0.11928	0.12322	0.12563	0.12781	0.12959	0.13059	0.13138	0.13192	0.13209	0.13191	0.12565
551.821	0.11939	0.12336	0.12582	0.12804	0.12986	0.1309	0.13174	0.13232	0.13254	0.13241	0.12619
552.024	0.11949	0.1235	0.126	0.12826	0.13013	0.13122	0.1321	0.13272	0.13299	0.13291	0.12672
552.228	0.11959	0.12364	0.12617	0.12848	0.1304	0.13153	0.13245	0.13312	0.13344	0.1334	0.12726
552.432	0.11969	0.12377	0.12635	0.1287	0.13066	0.13183	0.1328	0.13352	0.13388	0.13389	0.12779
552.636	0.11978	0.1239	0.12652	0.12891	0.13093	0.13214	0.13315	0.13392	0.13433	0.13438	0.12832
552.839	0.11987	0.12403	0.12669	0.12913	0.13119	0.13244	0.1335	0.13431	0.13477	0.13487	0.12885
553.043	0.11996	0.12415	0.12685	0.12933	0.13144	0.13274	0.13384	0.1347	0.13521	0.13536	0.12938
553.247	0.12004	0.12427	0.12701	0.12954	0.1317	0.13304	0.13419	0.13509	0.13565	0.13585	0.12991
553.45	0.12012	0.12439	0.12717	0.12974	0.13195	0.13333	0.13452	0.13548	0.13608	0.13633	0.13043
553.654	0.12019	0.1245	0.12733	0.12994	0.13219	0.13362	0.13486	0.13587	0.13651	0.13681	0.13095
553.858	0.12026	0.12461	0.12748	0.13013	0.13244	0.13391	0.1352	0.13625	0.13695	0.1373	0.13148
554.061	0.12033	0.12471	0.12763	0.13033	0.13268	0.1342	0.13553	0.13663	0.13738	0.13778	0.132
554.265	0.1204	0.12482	0.12777	0.13052	0.13292	0.13448	0.13586	0.13701	0.13781	0.13826	0.13252
554.469	0.12046	0.12491	0.12792	0.1307	0.13316	0.13476	0.13619	0.13739	0.13823	0.13873	0.13303
554.672	0.12051	0.12501	0.12806	0.13089	0.1334	0.13504	0.13651	0.13776	0.13866	0.13921	0.13355
554.876	0.12057	0.12511	0.1282	0.13107	0.13363	0.13532	0.13684	0.13814	0.13908	0.13968	0.13407
555.079	0.12062	0.1252	0.12833	0.13125	0.13386	0.1356	0.13716	0.13851	0.13951	0.14016	0.13458
555.283	0.12066	0.12528	0.12847	0.13143	0.13409	0.13587	0.13748	0.13888	0.13993	0.14063	0.1351
555.486	0.12071	0.12537	0.1286	0.1316	0.13431	0.13614	0.1378	0.13925	0.14035	0.1411	0.13561
555.69	0.12075	0.12545	0.12872	0.13177	0.13454	0.13641	0.13811	0.13962	0.14077	0.14157	0.13612
555.893	0.12079	0.12553	0.12885	0.13194	0.13476	0.13668	0.13843	0.13999	0.14118	0.14204	0.13663
556.097	0.12082	0.12561	0.12897	0.13211	0.13498	0.13694	0.13874	0.14035	0.1416	0.14251	0.13714
556.3	0.12085	0.12568	0.12909	0.13228	0.1352	0.13721	0.13905	0.14071	0.14201	0.14298	0.13765
556.503	0.12088	0.12576	0.12921	0.13244	0.13541	0.13747	0.13936	0.14108	0.14243	0.14345	0.13816
556.707	0.12091	0.12583	0.12933	0.1326	0.13563	0.13773	0.13967	0.14144	0.14284	0.14391	0.13867
556.91	0.12094	0.12589	0.12945	0.13276	0.13584	0.13799	0.13998	0.1418	0.14325	0.14438	0.13918
557.114	0.12096	0.12596	0.12956	0.13292	0.13605	0.13825	0.14029	0.14216	0.14366	0.14484	0.13968
557.317	0.12098	0.12603	0.12967	0.13308	0.13626	0.13851	0.14059	0.14252	0.14407	0.14531	0.14019
557.52	0.121	0.12609	0.12978	0.13324	0.13647	0.13876	0.1409	0.14288	0.14448	0.14577	0.1407
557.724	0.12101	0.12615	0.12989	0.13339	0.13668	0.13902	0.1412	0.14324	0.14489	0.14623	0.14121
557.927	0.12102	0.12621	0.13	0.13354	0.13689	0.13927	0.14151	0.14359	0.1453	0.1467	0.14171
558.13	0.12103	0.12626	0.13011	0.13369	0.13709	0.13952	0.14181	0.14395	0.14571	0.14716	0.14222
558.333	0.12104	0.12632	0.13021	0.13384	0.1373	0.13977	0.14211	0.14431	0.14612	0.14762	0.14273
558.537	0.12105	0.12637	0.13032	0.13399	0.1375	0.14003	0.14241	0.14466	0.14652	0.14808	0.14323
558.74	0.12106	0.12642	0.13042	0.13414	0.1377	0.14028	0.14271	0.14502	0.14693	0.14855	0.14374
558.943	0.12106	0.12648	0.13052	0.13429	0.13791	0.14053	0.14301	0.14538	0.14734	0.14901	0.14425
559.146	0.12106	0.12652	0.13062	0.13443	0.13811	0.14078	0.14331	0.14573	0.14775	0.14947	0.14476
559.35	0.12106	0.12657	0.13072	0.13458	0.13831	0.14102	0.14361	0.14609	0.14815	0.14993	0.14527
559.553	0.12106	0.12662	0.13081	0.13472	0.13851	0.14127	0.14391	0.14644	0.14856	0.15039	0.14577
559.756	0.12106	0.12666	0.13091	0.13487	0.13871	0.14152	0.14421	0.1468	0.14897	0.15086	0.14628
559.959	0.12106	0.12671	0.13101	0.13501	0.13891	0.14177	0.14451	0.14715	0.14937	0.15132	0.14679
560.162	0.12105	0.12675	0.1311	0.13515	0.13911	0.14201	0.14481	0.14751	0.14978	0.15178	0.1473
560.365	0.12104	0.12679	0.13119	0.13529	0.13931	0.14226	0.14511	0.14786	0.15018	0.15224	0.14782
560.568	0.12104	0.12683	0.13128	0.13544	0.1395	0.14251	0.14541	0.14822	0.15059	0.1527	0.14833
560.771	0.12103	0.12687	0.13137	0.13558	0.1397	0.14275	0.14571	0.14857	0.151	0.15317	0.14884
560.974	0.12102	0.12691	0.13146	0.13572	0.1399	0.143	0.14601	0.14893	0.1514	0.15363	0.14935
561.177	0.121	0.12695	0.13155	0.13586	0.1401	0.14324	0.14631	0.14928	0.15181	0.15409	0.14987
561.38	0.12099	0.12699	0.13164	0.13599	0.1403	0.14349	0.14661	0.14964	0.15221	0.15456	0.15038
561.583	0.12098	0.12702	0.13173	0.13613	0.14049	0.14373	0.1469	0.14999	0.15262	0.15502	0.15089
561.786	0.12096	0.12706	0.13181	0.13627	0.14069	0.14398	0.1472	0.15035	0.15303	0.15548	0.15141
561.989	0.12094	0.12709	0.1319	0.13641	0.14089	0.14422	0.1475	0.1507	0.15343	0.15595	0.15193
562.192	0.12093	0.12713	0.13198	0.13654	0.14108	0.14447	0.1478	0.15106	0.15384	0.15641	0.15244
562.395	0.12091	0.12716	0.13207	0.13668	0.14128	0.14471	0.1481	0.15141	0.15425	0.15688	0.15296
562.598	0.12089	0.12719	0.13215	0.13682	0.14148	0.14496	0.1484	0.15177	0.15465	0.15734	0.15348
562.801	0.12087	0.12722	0.13224	0.13695	0.14167	0.14521	0.1487	0.15212	0.15506	0.15781	0.154
563.004	0.12085	0.12726	0.13232	0.13709	0.14187	0.14545	0.149	0.15248	0.15547	0.15827	0.15452
563.207	0.12082	0.12729	0.1324	0.13722	0.14207	0.1457	0.1493	0.15284	0.15588	0.15874	0.15504
563.41	0.1208	0.12731	0.13248	0.13736	0.14226	0.14594	0.1496	0.15319	0.15629	0.15921	0.15556
563.612	0.12077	0.12734	0.13256	0.1375	0.14246	0.14619	0.1499	0.15355	0.15669	0.15968	0.15608
563.815	0.12075	0.12737	0.13264	0.13763	0.14266	0.14643	0.1502	0.15391	0.1571	0.16014	0.1566
564.018	0.12072	0.1274	0.13272	0.13776	0.14285	0.14668	0.1505	0.15426	0.15751	0.16061	0.15713
564.221	0.12069	0.12743	0.1328	0.1379	0.14305	0.14692	0.1508	0.15462	0.15792	0.16108	0.15765
564.424	0.12067	0.12745	0.13288	0.13803	0.14324	0.14717	0.1511	0.15498	0.15833	0.16155	0.15817
564.626	0.12064	0.12748	0.13296	0.13817	0.14344	0.14741	0.1514	0.15533	0.15874	0.16202	0.1587
564.829	0.12061	0.1275	0.13304	0.1383	0.14364	0.14766	0.1517	0.15569	0.15915	0.16249	0.15922
565.032	0.12058	0.12753	0.13311	0.13843	0.14383	0.14791	0.15201	0.15605	0.15956	0.16296	0.15975
565.234	0.12054	0.12755	0.13319	0.13856	0.14403	0.14815	0.15231	0.15641	0.15997	0.16343	0.16027
565.437	0.12051	0.12757	0.13326	0.13869	0.14422	0.14839	0.15261	0.15676	0.16038	0.16389	0.1608
565.64	0.12047	0.12759	0.13334	0.13883	0.14441	0.14864	0.15291	0.15712	0.16078	0.16436	0.16132
565.842	0.12044	0.12761	0.13341	0.13896	0.14461	0.14888	0.15321	0.15747	0.16119	0.16483	0.16185
566.045	0.1204	0.12763	0.13348	0.13908	0.1448	0.14912	0.1535	0.15783	0.1616	0.1653	0.16237
566.248	0.12036	0.12764	0.13355	0.13921	0.14499	0.14937	0.1538	0.15818	0.16201	0.16577	0.1629
566.45	0.12032	0.12766	0.13362	0.13934	0.14517	0.14961	0.1541	0.15854	0.16241	0.16623	0.16342
566.653	0.12027	0.12767	0.13369	0.13946	0.14536	0.14984	0.15439	0.15889	0.16282	0.1667	0.16394
566.855	0.12023	0.12768	0.13375	0.13959	0.14555	0.15008	0.15469	0.15924	0.16322	0.16716	0.16446
567.058	0.12018	0.12769	0.13381	0.13971	0.14573	0.15032	0.15498	0.15959	0.16362	0.16762	0.16498
567.26	0.12013	0.12769	0.13387	0.13983	0.14591	0.15055	0.15527	0.15994	0.16402	0.16808	0.1655
567.463	0.12008	0.1277	0.13393	0.13994	0.14609	0.15078	0.15555	0.16028	0.16442	0.16854	0.16601
567.665	0.12002	0.1277	0.13398	0.14006	0.14627	0.15101	0.15584	0.16062	0.16482	0.169	0.16653
567.868	0.11996	0.12769	0.13404	0.14017	0.14644	0.15124	0.15612	0.16096	0.16521	0.16945	0.16704
568.07	0.1199	0.12769	0.13409	0.14028	0.14661	0.15146	0.1564	0.1613	0.1656	0.1699	0.16755
568.273	0.11983	0.12768	0.13413	0.14038	0.14678	0.15168	0.15668	0.16164	0.16599	0.17035	0.16806
568.475	0.11976	0.12767	0.13418	0.14049	0.14694	0.1519	0.15695	0.16197	0.16638	0.1708	0.16856
568.678	0.11969	0.12765	0.13422	0.14059	0.1471	0.15212	0.15723	0.1623	0.16676	0.17124	0.16906
568.88	0.11962	0.12763	0.13426	0.14069	0.14726	0.15233	0.1575	0.16263	0.16714	0.17168	0.16956
569.082	0.11954	0.12761	0.13429	0.14078	0.14742	0.15254	0.15776	0.16295	0.16752	0.17212	0.17006
569.285	0.11946	0.12759	0.13433	0.14088	0.14757	0.15275	0.15803	0.16328	0.1679	0.17256	0.17056
569.487	0.11938	0.12756	0.13436	0.14097	0.14772	0.15295	0.15829	0.1636	0.16828	0.173	0.17105
569.689	0.11929	0.12753	0.13438	0.14105	0.14787	0.15315	0.15855	0.16392	0.16865	0.17343	0.17154
569.892	0.1192	0.1275	0.13441	0.14114	0.14801	0.15335	0.15881	0.16423	0.16902	0.17386	0.17203
570.094	0.11911	0.12747	0.13443	0.14122	0.14815	0.15355	0.15906	0.16454	0.16939	0.17428	0.17251
570.296	0.11902	0.12743	0.13445	0.14129	0.14829	0.15374	0.15931	0.16485	0.16975	0.17471	0.173
570.499	0.11892	0.12738	0.13446	0.14137	0.14842	0.15393	0.15956	0.16516	0.17011	0.17513	0.17348
570.701	0.11882	0.12734	0.13448	0.14144	0.14855	0.15412	0.1598	0.16547	0.17047	0.17555	0.17395
570.903	0.11871	0.12729	0.13449	0.14151	0.14868	0.15431	0.16004	0.16577	0.17083	0.17596	0.17443
571.105	0.1186	0.12724	0.13449	0.14158	0.14881	0.15449	0.16028	0.16607	0.17119	0.17638	0.1749
571.307	0.11849	0.12719	0.1345	0.14164	0.14893	0.15467	0.16052	0.16637	0.17154	0.17679	0.17537
571.51	0.11838	0.12713	0.1345	0.1417	0.14905	0.15484	0.16075	0.16666	0.17189	0.1772	0.17584
571.712	0.11826	0.12707	0.1345	0.14176	0.14917	0.15502	0.16098	0.16695	0.17223	0.1776	0.1763
571.914	0.11814	0.12701	0.13449	0.14182	0.14928	0.15519	0.16121	0.16724	0.17258	0.178	0.17676
572.116	0.11802	0.12695	0.13449	0.14187	0.14939	0.15535	0.16144	0.16753	0.17292	0.1784	0.17722
572.318	0.11789	0.12688	0.13448	0.14192	0.1495	0.15552	0.16166	0.16781	0.17326	0.1788	0.17768
572.52	0.11776	0.12681	0.13446	0.14196	0.1496	0.15568	0.16188	0.16809	0.17359	0.1792	0.17813
572.722	0.11763	0.12673	0.13445	0.14201	0.14971	0.15584	0.1621	0.16837	0.17393	0.17959	0.17858
572.924	0.1175	0.12666	0.13443	0.14205	0.14981	0.15599	0.16231	0.16864	0.17426	0.17998	0.17903
573.126	0.11736	0.12658	0.1344	0.14209	0.1499	0.15615	0.16252	0.16892	0.17458	0.18036	0.17948
573.328	0.11722	0.12649	0.13438	0.14212	0.15	0.1563	0.16273	0.16919	0.17491	0.18075	0.17992
573.53	0.11708	0.12641	0.13435	0.14215	0.15009	0.15645	0.16294	0.16945	0.17523	0.18113	0.18036
573.732	0.11693	0.12632	0.13432	0.14218	0.15018	0.15659	0.16314	0.16972	0.17555	0.18151	0.1808
573.934	0.11678	0.12623	0.13429	0.14221	0.15026	0.15674	0.16334	0.16998	0.17587	0.18188	0.18123
574.136	0.11663	0.12614	0.13425	0.14224	0.15035	0.15688	0.16354	0.17024	0.17619	0.18226	0.18167
574.338	0.11648	0.12604	0.13421	0.14226	0.15043	0.15701	0.16374	0.1705	0.1765	0.18263	0.1821
574.54	0.11632	0.12594	0.13417	0.14228	0.15051	0.15715	0.16393	0.17075	0.17681	0.183	0.18252
574.742	0.11616	0.12584	0.13412	0.14229	0.15058	0.15728	0.16412	0.17101	0.17711	0.18337	0.18295
574.944	0.116	0.12574	0.13407	0.14231	0.15066	0.15741	0.16431	0.17125	0.17742	0.18373	0.18337
575.146	0.11583	0.12563	0.13402	0.14232	0.15073	0.15754	0.16449	0.1715	0.17772	0.18409	0.18379
575.348	0.11567	0.12552	0.13397	0.14233	0.1508	0.15766	0.16468	0.17174	0.17802	0.18445	0.1842
575.55	0.1155	0.12541	0.13391	0.14233	0.15086	0.15778	0.16486	0.17198	0.17832	0.18481	0.18462
575.751	0.11532	0.12529	0.13385	0.14234	0.15093	0.1579	0.16503	0.17222	0.17861	0.18516	0.18503
575.953	0.11515	0.12517	0.13379	0.14234	0.15099	0.15802	0.16521	0.17246	0.1789	0.18551	0.18544
576.155	0.11497	0.12505	0.13373	0.14233	0.15105	0.15813	0.16538	0.17269	0.17919	0.18586	0.18584
576.357	0.11479	0.12493	0.13366	0.14233	0.1511	0.15824	0.16555	0.17292	0.17948	0.1862	0.18624
576.558	0.1146	0.1248	0.13359	0.14232	0.15116	0.15835	0.16572	0.17315	0.17976	0.18655	0.18664
576.76	0.11442	0.12468	0.13351	0.14231	0.15121	0.15846	0.16588	0.17337	0.18004	0.18689	0.18704
576.962	0.11423	0.12455	0.13344	0.1423	0.15126	0.15856	0.16605	0.1736	0.18032	0.18723	0.18744
577.164	0.11404	0.12441	0.13336	0.14229	0.15131	0.15867	0.16621	0.17382	0.1806	0.18757	0.18783
577.365	0.11385	0.12428	0.13328	0.14227	0.15135	0.15877	0.16637	0.17404	0.18088	0.1879	0.18822
577.567	0.11365	0.12415	0.1332	0.14225	0.1514	0.15887	0.16652	0.17425	0.18115	0.18823	0.18861
577.769	0.11346	0.12401	0.13312	0.14224	0.15144	0.15896	0.16668	0.17447	0.18142	0.18857	0.189
577.97	0.11326	0.12387	0.13304	0.14222	0.15148	0.15906	0.16683	0.17468	0.18169	0.1889	0.18939
578.172	0.11306	0.12373	0.13295	0.14219	0.15152	0.15915	0.16699	0.1749	0.18196	0.18922	0.18977
578.373	0.11286	0.12359	0.13286	0.14217	0.15156	0.15925	0.16714	0.17511	0.18223	0.18955	0.19015
578.575	0.11266	0.12345	0.13278	0.14215	0.1516	0.15934	0.16729	0.17532	0.18249	0.18988	0.19054
578.777	0.11246	0.12331	0.13269	0.14212	0.15164	0.15943	0.16744	0.17552	0.18276	0.1902	0.19092
578.978	0.11225	0.12316	0.1326	0.14209	0.15168	0.15952	0.16759	0.17573	0.18302	0.19052	0.19129
579.18	0.11205	0.12302	0.13251	0.14207	0.15171	0.15961	0.16773	0.17594	0.18328	0.19084	0.19167
579.381	0.11184	0.12288	0.13242	0.14204	0.15175	0.1597	0.16788	0.17614	0.18354	0.19116	0.19205
579.583	0.11164	0.12273	0.13233	0.14201	0.15178	0.15978	0.16802	0.17634	0.1838	0.19148	0.19242
579.784	0.11143	0.12258	0.13223	0.14198	0.15182	0.15987	0.16817	0.17655	0.18406	0.1918	0.1928
579.986	0.11122	0.12244	0.13214	0.14195	0.15185	0.15996	0.16831	0.17675	0.18431	0.19212	0.19317
580.187	0.11102	0.12229	0.13205	0.14191	0.15188	0.16004	0.16845	0.17695	0.18457	0.19243	0.19354
580.389	0.11081	0.12214	0.13195	0.14188	0.15191	0.16013	0.1686	0.17715	0.18482	0.19275	0.19391
580.59	0.1106	0.122	0.13186	0.14185	0.15194	0.16021	0.16874	0.17735	0.18508	0.19306	0.19428
580.791	0.11039	0.12185	0.13177	0.14182	0.15198	0.1603	0.16888	0.17755	0.18533	0.19337	0.19465
580.993	0.11018	0.1217	0.13167	0.14178	0.15201	0.16038	0.16902	0.17774	0.18558	0.19369	0.19502
581.194	0.10997	0.12155	0.13158	0.14175	0.15204	0.16046	0.16916	0.17794	0.18583	0.194	0.19539
581.395	0.10976	0.1214	0.13148	0.14171	0.15207	0.16054	0.1693	0.17814	0.18609	0.19431	0.19576
581.597	0.10955	0.12125	0.13139	0.14168	0.15209	0.16063	0.16944	0.17833	0.18634	0.19461	0.19612
581.798	0.10934	0.1211	0.13129	0.14164	0.15212	0.16071	0.16958	0.17853	0.18658	0.19492	0.19649
581.999	0.10913	0.12096	0.1312	0.1416	0.15215	0.16079	0.16971	0.17872	0.18683	0.19523	0.19685
582.201	0.10891	0.12081	0.1311	0.14157	0.15218	0.16087	0.16985	0.17892	0.18708	0.19553	0.19721
582.402	0.1087	0.12066	0.131	0.14153	0.15221	0.16095	0.16999	0.17911	0.18733	0.19584	0.19758
582.603	0.10849	0.1205	0.13091	0.14149	0.15223	0.16103	0.17012	0.1793	0.18757	0.19614	0.19794
582.804	0.10828	0.12035	0.13081	0.14145	0.15226	0.16111	0.17026	0.17949	0.18782	0.19644	0.1983
583.006	0.10806	0.1202	0.13071	0.14142	0.15228	0.16118	0.17039	0.17968	0.18806	0.19674	0.19865
583.207	0.10785	0.12005	0.13061	0.14138	0.15231	0.16126	0.17053	0.17987	0.1883	0.19704	0.19901
583.408	0.10764	0.1199	0.13051	0.14134	0.15233	0.16134	0.17066	0.18006	0.18854	0.19734	0.19937
583.609	0.10742	0.11974	0.13041	0.14129	0.15235	0.16141	0.17079	0.18025	0.18878	0.19763	0.19972
583.81	0.10721	0.11959	0.13031	0.14125	0.15238	0.16149	0.17092	0.18044	0.18902	0.19792	0.20007
584.011	0.10699	0.11943	0.13021	0.14121	0.1524	0.16156	0.17105	0.18062	0.18925	0.19822	0.20042
584.213	0.10678	0.11928	0.13011	0.14116	0.15241	0.16163	0.17117	0.1808	0.18948	0.19851	0.20077
584.414	0.10656	0.11912	0.13001	0.14112	0.15243	0.1617	0.1713	0.18098	0.18972	0.19879	0.20112
584.615	0.10634	0.11896	0.1299	0.14107	0.15245	0.16177	0.17142	0.18116	0.18995	0.19908	0.20146
584.816	0.10612	0.1188	0.12979	0.14102	0.15246	0.16183	0.17155	0.18134	0.19017	0.19936	0.2018
585.017	0.1059	0.11864	0.12969	0.14097	0.15248	0.1619	0.17167	0.18152	0.1904	0.19964	0.20214
585.218	0.10568	0.11848	0.12958	0.14092	0.15249	0.16196	0.17179	0.18169	0.19062	0.19992	0.20248
585.419	0.10546	0.11832	0.12947	0.14087	0.1525	0.16202	0.1719	0.18187	0.19085	0.2002	0.20282
585.62	0.10524	0.11815	0.12936	0.14081	0.15251	0.16208	0.17202	0.18204	0.19107	0.20047	0.20315
585.821	0.10501	0.11799	0.12925	0.14076	0.15251	0.16214	0.17213	0.18221	0.19128	0.20075	0.20348
586.022	0.10479	0.11782	0.12913	0.1407	0.15252	0.1622	0.17225	0.18237	0.1915	0.20102	0.20381
586.223	0.10456	0.11765	0.12902	0.14064	0.15252	0.16225	0.17236	0.18254	0.19171	0.20128	0.20414
586.424	0.10434	0.11749	0.1289	0.14058	0.15253	0.16231	0.17246	0.1827	0.19192	0.20155	0.20446
586.625	0.10411	0.11732	0.12879	0.14052	0.15253	0.16236	0.17257	0.18286	0.19213	0.20181	0.20478
586.826	0.10388	0.11714	0.12867	0.14046	0.15252	0.16241	0.17267	0.18302	0.19234	0.20207	0.2051
587.026	0.10365	0.11697	0.12855	0.14039	0.15252	0.16245	0.17277	0.18318	0.19254	0.20233	0.20542
587.227	0.10342	0.1168	0.12843	0.14033	0.15252	0.1625	0.17287	0.18333	0.19274	0.20259	0.20573
587.428	0.10319	0.11662	0.1283	0.14026	0.15251	0.16254	0.17297	0.18348	0.19294	0.20284	0.20604
587.629	0.10295	0.11644	0.12818	0.14019	0.1525	0.16258	0.17307	0.18363	0.19314	0.20309	0.20635
587.83	0.10272	0.11626	0.12805	0.14011	0.15249	0.16262	0.17316	0.18378	0.19333	0.20333	0.20665
588.031	0.10248	0.11608	0.12793	0.14004	0.15248	0.16266	0.17325	0.18392	0.19352	0.20358	0.20696
588.231	0.10225	0.1159	0.1278	0.13996	0.15246	0.16269	0.17334	0.18406	0.19371	0.20382	0.20725
588.432	0.10201	0.11572	0.12766	0.13989	0.15244	0.16273	0.17342	0.1842	0.1939	0.20406	0.20755
588.633	0.10177	0.11553	0.12753	0.13981	0.15242	0.16275	0.1735	0.18433	0.19408	0.20429	0.20784
588.834	0.10152	0.11534	0.12739	0.13972	0.1524	0.16278	0.17358	0.18447	0.19426	0.20452	0.20813
589.034	0.10128	0.11515	0.12726	0.13964	0.15238	0.16281	0.17366	0.1846	0.19443	0.20475	0.20842
589.235	0.10104	0.11496	0.12712	0.13955	0.15235	0.16283	0.17373	0.18472	0.19461	0.20498	0.2087
589.436	0.10079	0.11477	0.12697	0.13946	0.15232	0.16285	0.1738	0.18485	0.19477	0.2052	0.20898
589.636	0.10054	0.11457	0.12683	0.13937	0.15229	0.16286	0.17387	0.18497	0.19494	0.20542	0.20925
589.837	0.10029	0.11438	0.12668	0.13928	0.15225	0.16287	0.17393	0.18508	0.1951	0.20563	0.20953
590.038	0.10004	0.11418	0.12654	0.13918	0.15222	0.16289	0.17399	0.1852	0.19526	0.20585	0.2098
590.238	0.09978	0.11398	0.12638	0.13908	0.15218	0.16289	0.17405	0.18531	0.19542	0.20605	0.21006
590.439	0.09953	0.11377	0.12623	0.13898	0.15214	0.1629	0.17411	0.18542	0.19557	0.20626	0.21032
590.639	0.09927	0.11357	0.12608	0.13888	0.15209	0.1629	0.17416	0.18552	0.19572	0.20646	0.21058
590.84	0.09901	0.11336	0.12592	0.13878	0.15204	0.1629	0.17421	0.18562	0.19587	0.20666	0.21084
591.04	0.09875	0.11316	0.12576	0.13867	0.152	0.1629	0.17426	0.18572	0.19602	0.20686	0.21109
591.241	0.09849	0.11295	0.1256	0.13856	0.15194	0.16289	0.1743	0.18582	0.19616	0.20705	0.21134
591.441	0.09822	0.11273	0.12544	0.13845	0.15189	0.16289	0.17434	0.18591	0.1963	0.20724	0.21158
591.642	0.09796	0.11252	0.12527	0.13833	0.15183	0.16287	0.17438	0.186	0.19643	0.20743	0.21182
591.842	0.09769	0.11231	0.12511	0.13821	0.15177	0.16286	0.17441	0.18608	0.19656	0.20761	0.21206
592.043	0.09742	0.11209	0.12494	0.1381	0.15171	0.16284	0.17444	0.18616	0.19669	0.20779	0.21229
592.243	0.09715	0.11187	0.12477	0.13798	0.15165	0.16283	0.17447	0.18624	0.19682	0.20797	0.21252
592.444	0.09688	0.11165	0.1246	0.13785	0.15158	0.16281	0.17449	0.18632	0.19694	0.20814	0.21275
592.644	0.0966	0.11143	0.12443	0.13773	0.15151	0.16278	0.17452	0.18639	0.19706	0.20831	0.21297
592.845	0.09633	0.11121	0.12425	0.1376	0.15144	0.16276	0.17454	0.18647	0.19718	0.20848	0.21319
593.045	0.09605	0.11098	0.12408	0.13747	0.15137	0.16273	0.17456	0.18653	0.1973	0.20865	0.21341
593.245	0.09578	0.11076	0.1239	0.13734	0.15129	0.1627	0.17457	0.1866	0.19741	0.20881	0.21362
593.446	0.0955	0.11053	0.12372	0.13721	0.15122	0.16267	0.17459	0.18666	0.19752	0.20897	0.21383
593.646	0.09522	0.1103	0.12354	0.13708	0.15114	0.16263	0.17459	0.18672	0.19763	0.20913	0.21404
593.846	0.09493	0.11007	0.12336	0.13694	0.15105	0.16259	0.1746	0.18678	0.19773	0.20928	0.21424
594.047	0.09465	0.10984	0.12317	0.1368	0.15097	0.16255	0.17461	0.18683	0.19783	0.20943	0.21444
594.247	0.09437	0.10961	0.12299	0.13666	0.15088	0.16251	0.17461	0.18688	0.19793	0.20957	0.21464
594.447	0.09408	0.10938	0.1228	0.13652	0.15079	0.16246	0.17461	0.18693	0.19803	0.20972	0.21483
594.647	0.09379	0.10914	0.12262	0.13637	0.1507	0.16241	0.1746	0.18698	0.19812	0.20986	0.21502
594.848	0.0935	0.10891	0.12243	0.13623	0.15061	0.16237	0.1746	0.18702	0.19821	0.20999	0.21521
595.048	0.09322	0.10867	0.12224	0.13608	0.15051	0.16231	0.17459	0.18707	0.1983	0.21013	0.21539
595.248	0.09293	0.10843	0.12205	0.13593	0.15042	0.16226	0.17458	0.1871	0.19838	0.21026	0.21557
595.448	0.09264	0.1082	0.12186	0.13578	0.15032	0.16221	0.17457	0.18714	0.19847	0.21039	0.21575
595.648	0.09235	0.10796	0.12167	0.13563	0.15022	0.16215	0.17456	0.18718	0.19855	0.21052	0.21593
595.848	0.09205	0.10772	0.12147	0.13548	0.15012	0.16209	0.17454	0.18721	0.19863	0.21064	0.2161
596.049	0.09176	0.10748	0.12128	0.13533	0.15002	0.16203	0.17453	0.18724	0.19871	0.21076	0.21627
596.249	0.09147	0.10724	0.12109	0.13518	0.14991	0.16197	0.17451	0.18727	0.19878	0.21088	0.21644
596.449	0.09118	0.107	0.1209	0.13502	0.14981	0.16191	0.17449	0.1873	0.19886	0.211	0.2166
596.649	0.09089	0.10676	0.1207	0.13487	0.1497	0.16185	0.17447	0.18733	0.19893	0.21112	0.21677
596.849	0.0906	0.10652	0.12051	0.13471	0.1496	0.16178	0.17445	0.18735	0.199	0.21123	0.21693
597.049	0.09031	0.10628	0.12031	0.13456	0.14949	0.16172	0.17443	0.18738	0.19907	0.21134	0.21709
597.249	0.09001	0.10604	0.12012	0.1344	0.14938	0.16165	0.1744	0.1874	0.19914	0.21145	0.21725
597.449	0.08972	0.1058	0.11993	0.13425	0.14927	0.16159	0.17438	0.18742	0.19921	0.21156	0.2174
597.649	0.08943	0.10556	0.11973	0.13409	0.14916	0.16152	0.17436	0.18744	0.19927	0.21167	0.21755
597.849	0.08914	0.10532	0.11954	0.13393	0.14905	0.16145	0.17433	0.18746	0.19934	0.21177	0.21771
598.049	0.08885	0.10508	0.11934	0.13378	0.14894	0.16138	0.1743	0.18748	0.1994	0.21187	0.21785
598.249	0.08856	0.10484	0.11915	0.13362	0.14883	0.16132	0.17428	0.1875	0.19946	0.21197	0.218
598.449	0.08827	0.10459	0.11895	0.13346	0.14872	0.16124	0.17425	0.18751	0.19952	0.21207	0.21815
598.649	0.08798	0.10435	0.11876	0.1333	0.14861	0.16117	0.17422	0.18753	0.19958	0.21217	0.21829
598.848	0.0877	0.10411	0.11856	0.13315	0.14849	0.1611	0.17419	0.18754	0.19964	0.21226	0.21843
599.048	0.08741	0.10387	0.11837	0.13299	0.14838	0.16103	0.17416	0.18755	0.19969	0.21236	0.21857
599.248	0.08712	0.10363	0.11817	0.13283	0.14826	0.16095	0.17412	0.18756	0.19975	0.21245	0.21871
599.448	0.08683	0.10339	0.11798	0.13267	0.14815	0.16088	0.17409	0.18757	0.1998	0.21254	0.21884
599.648	0.08654	0.10315	0.11778	0.13251	0.14803	0.1608	0.17405	0.18758	0.19985	0.21262	0.21897
599.848	0.08626	0.10291	0.11758	0.13235	0.14791	0.16073	0.17402	0.18758	0.1999	0.21271	0.2191
600.047	0.08597	0.10267	0.11739	0.13219	0.14779	0.16065	0.17398	0.18758	0.19995	0.21279	0.21923
600.247	0.08568	0.10243	0.11719	0.13203	0.14767	0.16057	0.17394	0.18759	0.19999	0.21287	0.21936
600.447	0.0854	0.10219	0.11699	0.13187	0.14756	0.16049	0.1739	0.18759	0.20004	0.21295	0.21948
600.647	0.08511	0.10195	0.11679	0.13171	0.14743	0.16041	0.17386	0.18759	0.20008	0.21303	0.2196
600.846	0.08482	0.10171	0.11659	0.13154	0.14731	0.16032	0.17382	0.18759	0.20012	0.2131	0.21972
601.046	0.08454	0.10147	0.11639	0.13138	0.14719	0.16024	0.17378	0.18758	0.20016	0.21318	0.21983
601.246	0.08425	0.10123	0.11619	0.13122	0.14707	0.16015	0.17373	0.18758	0.2002	0.21325	0.21994
601.445	0.08397	0.10098	0.11599	0.13105	0.14694	0.16007	0.17368	0.18757	0.20023	0.21331	0.22005
601.645	0.08368	0.10074	0.11579	0.13089	0.14682	0.15998	0.17363	0.18756	0.20026	0.21338	0.22016
601.845	0.08339	0.1005	0.11558	0.13072	0.14669	0.15989	0.17358	0.18754	0.20029	0.21344	0.22027
602.044	0.08311	0.10025	0.11538	0.13056	0.14656	0.1598	0.17353	0.18753	0.20032	0.2135	0.22037
602.244	0.08282	0.10001	0.11517	0.13039	0.14643	0.1597	0.17348	0.18751	0.20034	0.21356	0.22047
602.444	0.08253	0.09976	0.11496	0.13022	0.1463	0.15961	0.17342	0.18749	0.20036	0.21361	0.22056
602.643	0.08224	0.09952	0.11476	0.13005	0.14617	0.15951	0.17336	0.18747	0.20038	0.21366	0.22065
602.843	0.08196	0.09927	0.11455	0.12987	0.14603	0.15941	0.1733	0.18745	0.2004	0.21371	0.22074
603.042	0.08167	0.09902	0.11433	0.1297	0.14589	0.15931	0.17323	0.18742	0.20041	0.21375	0.22083
603.242	0.08138	0.09877	0.11412	0.12952	0.14575	0.15921	0.17317	0.18739	0.20042	0.21379	0.22091
603.441	0.08109	0.09852	0.11391	0.12935	0.14561	0.1591	0.1731	0.18735	0.20043	0.21383	0.22099
603.641	0.0808	0.09826	0.11369	0.12917	0.14547	0.15899	0.17303	0.18732	0.20043	0.21386	0.22106
603.84	0.0805	0.09801	0.11347	0.12899	0.14533	0.15888	0.17295	0.18728	0.20043	0.21389	0.22113
604.04	0.08021	0.09776	0.11325	0.1288	0.14518	0.15877	0.17288	0.18724	0.20043	0.21392	0.2212
604.239	0.07992	0.0975	0.11303	0.12862	0.14504	0.15866	0.1728	0.18719	0.20043	0.21395	0.22127
604.438	0.07963	0.09725	0.11281	0.12844	0.14489	0.15854	0.17272	0.18714	0.20042	0.21397	0.22133
604.638	0.07933	0.09699	0.11259	0.12825	0.14474	0.15842	0.17264	0.18709	0.2004	0.21399	0.22139
604.837	0.07904	0.09673	0.11236	0.12806	0.14459	0.1583	0.17255	0.18704	0.20039	0.214	0.22145
605.037	0.07874	0.09647	0.11214	0.12787	0.14443	0.15818	0.17246	0.18698	0.20037	0.21401	0.2215
605.236	0.07844	0.09621	0.11191	0.12768	0.14427	0.15806	0.17237	0.18692	0.20035	0.21402	0.22155
605.435	0.07815	0.09595	0.11168	0.12748	0.14412	0.15793	0.17227	0.18686	0.20032	0.21402	0.22159
605.635	0.07785	0.09568	0.11144	0.12729	0.14395	0.1578	0.17218	0.18679	0.20029	0.21402	0.22163
605.834	0.07754	0.09542	0.11121	0.12709	0.14379	0.15766	0.17208	0.18672	0.20026	0.21402	0.22167
606.033	0.07724	0.09515	0.11097	0.12688	0.14362	0.15753	0.17197	0.18665	0.20022	0.21401	0.2217
606.232	0.07694	0.09488	0.11074	0.12668	0.14346	0.15739	0.17187	0.18657	0.20018	0.214	0.22173
606.432	0.07664	0.09461	0.1105	0.12648	0.14329	0.15725	0.17176	0.18649	0.20014	0.21398	0.22175
606.631	0.07633	0.09434	0.11025	0.12627	0.14312	0.15711	0.17165	0.18641	0.20009	0.21396	0.22177
606.83	0.07603	0.09407	0.11001	0.12606	0.14294	0.15696	0.17153	0.18633	0.20004	0.21394	0.22179
607.029	0.07572	0.0938	0.10977	0.12585	0.14277	0.15681	0.17142	0.18624	0.19998	0.21391	0.22181
607.228	0.07541	0.09353	0.10952	0.12564	0.14259	0.15666	0.1713	0.18615	0.19993	0.21388	0.22182
607.428	0.0751	0.09325	0.10927	0.12542	0.14241	0.15651	0.17117	0.18605	0.19987	0.21385	0.22182
607.627	0.07479	0.09298	0.10902	0.12521	0.14223	0.15636	0.17105	0.18595	0.1998	0.21381	0.22183
607.826	0.07449	0.0927	0.10877	0.12499	0.14204	0.1562	0.17092	0.18586	0.19973	0.21377	0.22183
608.025	0.07417	0.09242	0.10852	0.12477	0.14186	0.15604	0.17079	0.18575	0.19966	0.21373	0.22182
608.224	0.07386	0.09214	0.10827	0.12455	0.14167	0.15588	0.17066	0.18565	0.19959	0.21368	0.22182
608.423	0.07355	0.09186	0.10802	0.12433	0.14148	0.15572	0.17053	0.18554	0.19951	0.21363	0.22181
608.622	0.07324	0.09158	0.10776	0.1241	0.1413	0.15555	0.17039	0.18543	0.19943	0.21358	0.2218
608.821	0.07293	0.0913	0.10751	0.12388	0.1411	0.15538	0.17025	0.18532	0.19935	0.21353	0.22178
609.02	0.07261	0.09102	0.10725	0.12365	0.14091	0.15522	0.17011	0.1852	0.19927	0.21347	0.22176
609.219	0.0723	0.09074	0.10699	0.12342	0.14072	0.15504	0.16997	0.18509	0.19918	0.21341	0.22174
609.418	0.07199	0.09046	0.10673	0.1232	0.14052	0.15487	0.16982	0.18497	0.19909	0.21334	0.22171
609.617	0.07167	0.09017	0.10647	0.12297	0.14033	0.1547	0.16968	0.18484	0.19899	0.21327	0.22168
609.816	0.07136	0.08989	0.10621	0.12273	0.14013	0.15452	0.16953	0.18472	0.1989	0.2132	0.22165
610.015	0.07104	0.0896	0.10595	0.1225	0.13993	0.15434	0.16938	0.18459	0.1988	0.21313	0.22161
610.214	0.07073	0.08932	0.10569	0.12227	0.13973	0.15416	0.16922	0.18446	0.19869	0.21305	0.22157
610.413	0.07041	0.08903	0.10543	0.12203	0.13952	0.15398	0.16907	0.18433	0.19859	0.21297	0.22153
610.612	0.0701	0.08874	0.10516	0.12179	0.13932	0.1538	0.16891	0.1842	0.19848	0.21288	0.22148
610.811	0.06978	0.08845	0.1049	0.12156	0.13911	0.15361	0.16875	0.18406	0.19837	0.2128	0.22144
611.01	0.06946	0.08817	0.10463	0.12132	0.13891	0.15343	0.16858	0.18392	0.19825	0.21271	0.22138
611.209	0.06915	0.08788	0.10437	0.12108	0.1387	0.15324	0.16842	0.18378	0.19814	0.21261	0.22133
611.407	0.06883	0.08759	0.1041	0.12084	0.13849	0.15305	0.16826	0.18364	0.19802	0.21252	0.22127
611.606	0.06852	0.0873	0.10384	0.12059	0.13828	0.15286	0.16809	0.1835	0.19789	0.21242	0.22121
611.805	0.0682	0.08701	0.10357	0.12035	0.13807	0.15266	0.16792	0.18335	0.19777	0.21232	0.22114
612.004	0.06788	0.08672	0.1033	0.12011	0.13785	0.15247	0.16775	0.1832	0.19764	0.21221	0.22108
612.202	0.06757	0.08643	0.10303	0.11986	0.13764	0.15227	0.16757	0.18305	0.19751	0.21211	0.221
612.401	0.06725	0.08613	0.10277	0.11962	0.13742	0.15207	0.1674	0.1829	0.19738	0.212	0.22093
612.6	0.06694	0.08584	0.1025	0.11937	0.13721	0.15188	0.16722	0.18274	0.19724	0.21189	0.22085
612.799	0.06662	0.08555	0.10223	0.11912	0.13699	0.15168	0.16704	0.18259	0.19711	0.21177	0.22077
612.997	0.06631	0.08526	0.10196	0.11888	0.13677	0.15147	0.16686	0.18243	0.19697	0.21165	0.22069
613.196	0.06599	0.08497	0.10169	0.11863	0.13655	0.15127	0.16668	0.18227	0.19683	0.21154	0.22061
613.395	0.06568	0.08468	0.10142	0.11838	0.13633	0.15107	0.1665	0.18211	0.19668	0.21141	0.22052
613.593	0.06536	0.08438	0.10115	0.11813	0.13611	0.15086	0.16631	0.18194	0.19654	0.21129	0.22043
613.792	0.06505	0.08409	0.10088	0.11788	0.13588	0.15066	0.16613	0.18178	0.19639	0.21116	0.22034
613.991	0.06474	0.0838	0.10061	0.11763	0.13566	0.15045	0.16594	0.18161	0.19624	0.21104	0.22024
614.189	0.06442	0.08351	0.10034	0.11738	0.13544	0.15025	0.16575	0.18145	0.19609	0.21091	0.22014
614.388	0.06411	0.08322	0.10007	0.11713	0.13521	0.15004	0.16556	0.18128	0.19594	0.21077	0.22004
614.586	0.0638	0.08293	0.0998	0.11688	0.13499	0.14983	0.16537	0.1811	0.19578	0.21064	0.21994
614.785	0.06349	0.08264	0.09953	0.11663	0.13476	0.14962	0.16518	0.18093	0.19562	0.2105	0.21983
614.983	0.06318	0.08235	0.09926	0.11638	0.13453	0.14941	0.16499	0.18076	0.19546	0.21036	0.21972
615.182	0.06287	0.08206	0.09899	0.11613	0.1343	0.1492	0.16479	0.18058	0.1953	0.21022	0.21961
615.38	0.06256	0.08177	0.09872	0.11588	0.13408	0.14899	0.1646	0.1804	0.19514	0.21008	0.2195
615.579	0.06225	0.08148	0.09845	0.11563	0.13385	0.14878	0.1644	0.18022	0.19498	0.20994	0.21938
615.777	0.06194	0.08119	0.09818	0.11538	0.13362	0.14856	0.1642	0.18004	0.19481	0.20979	0.21927
615.976	0.06164	0.0809	0.09791	0.11513	0.13338	0.14835	0.164	0.17986	0.19464	0.20964	0.21914
616.174	0.06133	0.08061	0.09764	0.11488	0.13315	0.14813	0.1638	0.17968	0.19447	0.20949	0.21902
616.373	0.06103	0.08032	0.09737	0.11463	0.13292	0.14791	0.1636	0.17949	0.1943	0.20934	0.21889
616.571	0.06072	0.08003	0.0971	0.11438	0.13268	0.1477	0.16339	0.1793	0.19412	0.20918	0.21876
616.769	0.06041	0.07974	0.09683	0.11412	0.13245	0.14748	0.16318	0.17911	0.19394	0.20902	0.21863
616.968	0.06011	0.07945	0.09655	0.11387	0.13221	0.14725	0.16298	0.17892	0.19376	0.20886	0.2185
617.166	0.05981	0.07916	0.09628	0.11362	0.13197	0.14703	0.16277	0.17873	0.19358	0.2087	0.21836
617.364	0.0595	0.07887	0.09601	0.11336	0.13173	0.14681	0.16255	0.17853	0.19339	0.20853	0.21821
617.563	0.0592	0.07858	0.09574	0.11311	0.13149	0.14658	0.16234	0.17833	0.19321	0.20836	0.21807
617.761	0.05889	0.07829	0.09546	0.11285	0.13125	0.14635	0.16212	0.17813	0.19302	0.20819	0.21792
617.959	0.05859	0.078	0.09519	0.11259	0.131	0.14612	0.16191	0.17793	0.19282	0.20802	0.21777
618.157	0.05829	0.07771	0.09492	0.11233	0.13076	0.14589	0.16169	0.17772	0.19263	0.20784	0.21761
618.356	0.05798	0.07742	0.09464	0.11207	0.13051	0.14566	0.16146	0.17751	0.19243	0.20766	0.21746
618.554	0.05768	0.07712	0.09436	0.11181	0.13026	0.14542	0.16124	0.1773	0.19223	0.20748	0.2173
618.752	0.05737	0.07683	0.09409	0.11155	0.13001	0.14519	0.16101	0.17709	0.19203	0.20729	0.21713
618.95	0.05707	0.07654	0.09381	0.11129	0.12976	0.14495	0.16078	0.17688	0.19182	0.20711	0.21696
619.148	0.05677	0.07625	0.09353	0.11102	0.12951	0.14471	0.16055	0.17666	0.19161	0.20692	0.21679
619.347	0.05646	0.07595	0.09325	0.11076	0.12925	0.14447	0.16032	0.17644	0.1914	0.20672	0.21662
619.545	0.05616	0.07566	0.09297	0.11049	0.12899	0.14422	0.16009	0.17622	0.19119	0.20653	0.21644
619.743	0.05586	0.07537	0.09269	0.11022	0.12874	0.14398	0.15985	0.17599	0.19097	0.20633	0.21626
619.941	0.05555	0.07507	0.09241	0.10995	0.12848	0.14373	0.15961	0.17577	0.19076	0.20612	0.21608
620.139	0.05525	0.07478	0.09213	0.10968	0.12821	0.14348	0.15937	0.17554	0.19054	0.20592	0.21589
620.337	0.05495	0.07448	0.09185	0.10941	0.12795	0.14322	0.15913	0.17531	0.19031	0.20571	0.2157
620.535	0.05464	0.07418	0.09157	0.10914	0.12768	0.14297	0.15888	0.17507	0.19009	0.2055	0.21551
620.733	0.05434	0.07389	0.09128	0.10886	0.12742	0.14271	0.15863	0.17483	0.18986	0.20529	0.21531
620.931	0.05403	0.07359	0.091	0.10859	0.12715	0.14246	0.15838	0.1746	0.18963	0.20507	0.21511
621.129	0.05373	0.07329	0.09071	0.10831	0.12688	0.1422	0.15813	0.17435	0.18939	0.20485	0.21491
621.327	0.05342	0.073	0.09043	0.10803	0.12661	0.14193	0.15788	0.17411	0.18916	0.20463	0.21471
621.525	0.05312	0.0727	0.09014	0.10775	0.12633	0.14167	0.15762	0.17386	0.18892	0.2044	0.2145
621.723	0.05282	0.0724	0.08985	0.10747	0.12606	0.14141	0.15737	0.17362	0.18868	0.20417	0.21429
621.921	0.05251	0.0721	0.08957	0.10719	0.12578	0.14114	0.15711	0.17337	0.18844	0.20394	0.21408
622.119	0.05221	0.0718	0.08928	0.10691	0.12551	0.14087	0.15685	0.17312	0.18819	0.20371	0.21386
622.317	0.0519	0.07151	0.08899	0.10663	0.12523	0.1406	0.15659	0.17286	0.18795	0.20348	0.21364
622.515	0.0516	0.07121	0.0887	0.10635	0.12495	0.14033	0.15632	0.17261	0.1877	0.20324	0.21342
622.713	0.0513	0.07091	0.08842	0.10607	0.12467	0.14006	0.15606	0.17235	0.18745	0.203	0.2132
622.91	0.051	0.07062	0.08813	0.10579	0.12439	0.13979	0.15579	0.17209	0.1872	0.20276	0.21298
623.108	0.0507	0.07032	0.08784	0.1055	0.12411	0.13952	0.15553	0.17183	0.18695	0.20251	0.21275
623.306	0.0504	0.07002	0.08755	0.10522	0.12383	0.13924	0.15526	0.17157	0.18669	0.20226	0.21252
623.504	0.0501	0.06973	0.08726	0.10493	0.12355	0.13897	0.15499	0.17131	0.18643	0.20201	0.21229
623.702	0.0498	0.06943	0.08697	0.10465	0.12327	0.13869	0.15472	0.17104	0.18617	0.20176	0.21205
623.899	0.0495	0.06913	0.08668	0.10436	0.12298	0.13841	0.15445	0.17078	0.18591	0.20151	0.21182
624.097	0.0492	0.06884	0.08639	0.10408	0.1227	0.13813	0.15418	0.17051	0.18565	0.20125	0.21158
624.295	0.0489	0.06854	0.0861	0.10379	0.12241	0.13785	0.1539	0.17024	0.18538	0.20099	0.21134
624.493	0.0486	0.06824	0.08581	0.10351	0.12213	0.13757	0.15363	0.16997	0.18512	0.20073	0.2111
624.69	0.0483	0.06795	0.08552	0.10322	0.12185	0.13729	0.15335	0.1697	0.18485	0.20047	0.21085
624.888	0.04801	0.06766	0.08523	0.10293	0.12156	0.13701	0.15308	0.16943	0.18458	0.2002	0.21061
625.086	0.04771	0.06736	0.08494	0.10265	0.12127	0.13673	0.1528	0.16916	0.18431	0.19993	0.21036
625.283	0.04741	0.06707	0.08465	0.10236	0.12099	0.13645	0.15252	0.16888	0.18404	0.19967	0.21011
625.481	0.04712	0.06677	0.08436	0.10208	0.1207	0.13616	0.15225	0.16861	0.18376	0.19939	0.20986
625.679	0.04683	0.06648	0.08407	0.10179	0.12042	0.13588	0.15197	0.16833	0.18349	0.19912	0.20961
625.876	0.04653	0.06619	0.08378	0.1015	0.12013	0.1356	0.15169	0.16805	0.18321	0.19885	0.20935
626.074	0.04624	0.0659	0.08349	0.10122	0.11984	0.13531	0.15141	0.16778	0.18294	0.19857	0.2091
626.271	0.04595	0.06561	0.0832	0.10093	0.11956	0.13503	0.15113	0.1675	0.18266	0.19829	0.20884
626.469	0.04566	0.06531	0.08291	0.10065	0.11927	0.13474	0.15084	0.16722	0.18237	0.19801	0.20858
626.666	0.04537	0.06502	0.08262	0.10036	0.11899	0.13445	0.15056	0.16693	0.18209	0.19773	0.20832
626.864	0.04508	0.06473	0.08233	0.10007	0.1187	0.13417	0.15028	0.16665	0.18181	0.19744	0.20806
627.061	0.04479	0.06444	0.08204	0.09979	0.11841	0.13388	0.14999	0.16637	0.18152	0.19716	0.20779
627.259	0.0445	0.06416	0.08175	0.0995	0.11813	0.13359	0.14971	0.16608	0.18124	0.19687	0.20753
627.456	0.04421	0.06387	0.08146	0.09922	0.11784	0.13331	0.14943	0.1658	0.18095	0.19658	0.20726
627.654	0.04393	0.06358	0.08117	0.09893	0.11755	0.13302	0.14914	0.16551	0.18066	0.19629	0.20699
627.851	0.04364	0.06329	0.08088	0.09864	0.11726	0.13273	0.14885	0.16522	0.18037	0.19599	0.20672
628.049	0.04336	0.063	0.08059	0.09836	0.11698	0.13244	0.14857	0.16494	0.18007	0.1957	0.20644
628.246	0.04307	0.06272	0.0803	0.09807	0.11669	0.13215	0.14828	0.16465	0.17978	0.1954	0.20617
628.443	0.04279	0.06243	0.08002	0.09779	0.1164	0.13186	0.14799	0.16436	0.17949	0.1951	0.20589
628.641	0.04251	0.06214	0.07973	0.0975	0.11612	0.13158	0.1477	0.16406	0.17919	0.1948	0.20561
628.838	0.04222	0.06186	0.07944	0.09722	0.11583	0.13129	0.14741	0.16377	0.17889	0.1945	0.20533
629.036	0.04194	0.06158	0.07915	0.09693	0.11554	0.131	0.14712	0.16348	0.17859	0.1942	0.20505
629.233	0.04167	0.06129	0.07887	0.09665	0.11526	0.13071	0.14684	0.16319	0.17829	0.1939	0.20477
629.43	0.04139	0.06101	0.07858	0.09637	0.11497	0.13042	0.14655	0.16289	0.17799	0.19359	0.20449
629.627	0.04111	0.06073	0.07829	0.09608	0.11469	0.13013	0.14626	0.1626	0.17769	0.19329	0.2042
629.825	0.04084	0.06045	0.07801	0.0958	0.1144	0.12984	0.14597	0.16231	0.17739	0.19298	0.20392
630.022	0.04057	0.06018	0.07773	0.09552	0.11412	0.12956	0.14568	0.16201	0.17709	0.19267	0.20363
630.219	0.04029	0.0599	0.07744	0.09524	0.11384	0.12927	0.14539	0.16172	0.17679	0.19237	0.20334
630.416	0.04003	0.05963	0.07716	0.09496	0.11356	0.12898	0.1451	0.16143	0.17648	0.19206	0.20305
630.614	0.03976	0.05935	0.07688	0.09469	0.11328	0.1287	0.14481	0.16113	0.17618	0.19175	0.20277
630.811	0.03949	0.05908	0.07661	0.09441	0.113	0.12841	0.14453	0.16084	0.17588	0.19144	0.20247
631.008	0.03923	0.05881	0.07633	0.09413	0.11272	0.12813	0.14424	0.16054	0.17557	0.19113	0.20218
631.205	0.03896	0.05854	0.07605	0.09386	0.11244	0.12784	0.14395	0.16025	0.17527	0.19081	0.20189
631.402	0.0387	0.05828	0.07577	0.09358	0.11216	0.12756	0.14366	0.15996	0.17496	0.1905	0.2016
631.599	0.03844	0.05801	0.0755	0.09331	0.11188	0.12727	0.14337	0.15966	0.17465	0.19019	0.2013
631.796	0.03819	0.05774	0.07523	0.09304	0.11161	0.12699	0.14309	0.15937	0.17435	0.18987	0.20101
631.993	0.03793	0.05748	0.07495	0.09276	0.11133	0.12671	0.1428	0.15907	0.17404	0.18956	0.20071
632.19	0.03768	0.05722	0.07468	0.09249	0.11105	0.12642	0.14251	0.15878	0.17373	0.18924	0.20041
632.388	0.03742	0.05696	0.07441	0.09222	0.11078	0.12614	0.14222	0.15848	0.17342	0.18893	0.20011
632.585	0.03717	0.0567	0.07414	0.09195	0.1105	0.12585	0.14193	0.15818	0.17311	0.18861	0.19981
632.782	0.03692	0.05644	0.07387	0.09168	0.11022	0.12557	0.14164	0.15789	0.1728	0.18829	0.19951
632.979	0.03667	0.05618	0.0736	0.09141	0.10995	0.12529	0.14135	0.15759	0.17249	0.18797	0.19921
633.176	0.03642	0.05592	0.07333	0.09114	0.10967	0.125	0.14106	0.15729	0.17217	0.18765	0.1989
633.372	0.03617	0.05566	0.07306	0.09087	0.1094	0.12471	0.14077	0.15699	0.17186	0.18732	0.19859
633.569	0.03593	0.0554	0.07279	0.09059	0.10912	0.12443	0.14048	0.15668	0.17154	0.187	0.19828
633.766	0.03568	0.05514	0.07252	0.09032	0.10884	0.12414	0.14018	0.15638	0.17122	0.18667	0.19797
633.963	0.03543	0.05489	0.07225	0.09005	0.10856	0.12385	0.13988	0.15607	0.1709	0.18634	0.19765
634.16	0.03519	0.05463	0.07198	0.08978	0.10828	0.12356	0.13959	0.15577	0.17058	0.18601	0.19733
634.357	0.03494	0.05437	0.07171	0.0895	0.108	0.12327	0.13929	0.15546	0.17025	0.18567	0.19701
634.554	0.0347	0.05412	0.07144	0.08923	0.10772	0.12298	0.13899	0.15515	0.16993	0.18534	0.19669
634.751	0.03445	0.05386	0.07117	0.08896	0.10744	0.12269	0.13869	0.15484	0.1696	0.185	0.19636
634.948	0.03421	0.0536	0.0709	0.08868	0.10716	0.12239	0.13838	0.15452	0.16927	0.18466	0.19604
635.144	0.03397	0.05335	0.07063	0.08841	0.10687	0.1221	0.13808	0.15421	0.16894	0.18432	0.19571
635.341	0.03372	0.05309	0.07036	0.08813	0.10659	0.1218	0.13777	0.15389	0.16861	0.18398	0.19537
635.538	0.03348	0.05283	0.07009	0.08785	0.1063	0.1215	0.13747	0.15357	0.16828	0.18363	0.19504
635.735	0.03324	0.05258	0.06982	0.08758	0.10602	0.1212	0.13716	0.15325	0.16794	0.18328	0.1947
635.931	0.033	0.05232	0.06955	0.0873	0.10573	0.1209	0.13684	0.15293	0.1676	0.18294	0.19436
636.128	0.03275	0.05206	0.06928	0.08702	0.10544	0.1206	0.13653	0.1526	0.16726	0.18258	0.19402
636.325	0.03251	0.05181	0.069	0.08674	0.10515	0.1203	0.13622	0.15227	0.16692	0.18223	0.19367
636.522	0.03227	0.05155	0.06873	0.08646	0.10486	0.11999	0.1359	0.15194	0.16658	0.18188	0.19332
636.718	0.03203	0.05129	0.06846	0.08618	0.10457	0.11969	0.13558	0.15161	0.16624	0.18152	0.19297
636.915	0.03179	0.05104	0.06819	0.0859	0.10427	0.11938	0.13526	0.15128	0.16589	0.18116	0.19262
637.112	0.03155	0.05078	0.06792	0.08561	0.10398	0.11907	0.13494	0.15095	0.16554	0.1808	0.19226
637.308	0.03131	0.05053	0.06765	0.08533	0.10368	0.11876	0.13462	0.15061	0.16519	0.18043	0.1919
637.505	0.03107	0.05027	0.06738	0.08505	0.10339	0.11845	0.13429	0.15027	0.16484	0.18007	0.19154
637.701	0.03082	0.05001	0.06711	0.08476	0.10309	0.11814	0.13397	0.14993	0.16449	0.1797	0.19118
637.898	0.03058	0.04976	0.06684	0.08448	0.10279	0.11783	0.13364	0.14959	0.16414	0.17933	0.19081
638.094	0.03034	0.0495	0.06657	0.08419	0.1025	0.11751	0.13331	0.14924	0.16378	0.17896	0.19045
638.291	0.0301	0.04924	0.06629	0.08391	0.1022	0.1172	0.13298	0.1489	0.16343	0.17859	0.19008
638.488	0.02987	0.04899	0.06602	0.08362	0.1019	0.11688	0.13265	0.14855	0.16307	0.17821	0.18971
638.684	0.02963	0.04873	0.06575	0.08334	0.10159	0.11656	0.13231	0.1482	0.16271	0.17784	0.18933
638.881	0.02939	0.04848	0.06548	0.08305	0.10129	0.11624	0.13198	0.14785	0.16235	0.17746	0.18895
639.077	0.02915	0.04822	0.06521	0.08276	0.10099	0.11592	0.13164	0.1475	0.16198	0.17708	0.18858
639.273	0.02891	0.04797	0.06494	0.08247	0.10069	0.1156	0.13131	0.14714	0.16162	0.1767	0.1882
639.47	0.02867	0.04771	0.06467	0.08219	0.10038	0.11528	0.13097	0.14679	0.16125	0.17631	0.18781
639.666	0.02844	0.04746	0.06441	0.0819	0.10008	0.11496	0.13063	0.14643	0.16088	0.17593	0.18743
639.863	0.0282	0.04721	0.06414	0.08161	0.09977	0.11464	0.13029	0.14607	0.16052	0.17554	0.18704
640.059	0.02796	0.04695	0.06387	0.08132	0.09947	0.11432	0.12995	0.14571	0.16015	0.17515	0.18665
640.255	0.02773	0.0467	0.0636	0.08103	0.09916	0.11399	0.1296	0.14535	0.15977	0.17476	0.18626
640.452	0.02749	0.04645	0.06333	0.08074	0.09885	0.11367	0.12926	0.14499	0.1594	0.17436	0.18587
640.648	0.02726	0.0462	0.06306	0.08045	0.09854	0.11334	0.12892	0.14463	0.15902	0.17397	0.18548
640.845	0.02702	0.04594	0.06279	0.08016	0.09824	0.11301	0.12857	0.14426	0.15865	0.17357	0.18508
641.041	0.02679	0.04569	0.06253	0.07987	0.09793	0.11269	0.12822	0.14389	0.15827	0.17317	0.18468
641.237	0.02655	0.04544	0.06226	0.07958	0.09762	0.11236	0.12787	0.14352	0.15789	0.17277	0.18428
641.433	0.02632	0.04519	0.06199	0.07929	0.0973	0.11203	0.12752	0.14315	0.15751	0.17237	0.18387
641.63	0.02608	0.04494	0.06172	0.079	0.09699	0.1117	0.12717	0.14278	0.15712	0.17197	0.18347
641.826	0.02585	0.04469	0.06146	0.07871	0.09668	0.11136	0.12682	0.14241	0.15674	0.17156	0.18306
642.022	0.02562	0.04444	0.06119	0.07841	0.09636	0.11103	0.12646	0.14203	0.15635	0.17115	0.18265
642.218	0.02538	0.04418	0.06092	0.07812	0.09605	0.1107	0.12611	0.14166	0.15596	0.17074	0.18224
642.414	0.02515	0.04393	0.06065	0.07783	0.09573	0.11036	0.12575	0.14128	0.15557	0.17033	0.18182
642.611	0.02492	0.04368	0.06038	0.07753	0.09541	0.11003	0.12539	0.1409	0.15518	0.16992	0.1814
642.807	0.02469	0.04343	0.06011	0.07724	0.0951	0.10969	0.12503	0.14052	0.15479	0.1695	0.18099
643.003	0.02446	0.04318	0.05985	0.07694	0.09478	0.10935	0.12467	0.14014	0.15439	0.16908	0.18056
643.199	0.02422	0.04293	0.05958	0.07664	0.09446	0.10901	0.12431	0.13975	0.154	0.16866	0.18014
643.395	0.02399	0.04268	0.05931	0.07635	0.09414	0.10867	0.12395	0.13937	0.1536	0.16824	0.17972
643.591	0.02376	0.04243	0.05904	0.07605	0.09382	0.10833	0.12358	0.13898	0.1532	0.16782	0.17929
643.787	0.02353	0.04219	0.05878	0.07576	0.0935	0.10799	0.12322	0.1386	0.1528	0.1674	0.17886
643.983	0.02331	0.04194	0.05851	0.07546	0.09317	0.10765	0.12285	0.13821	0.1524	0.16697	0.17843
644.179	0.02308	0.04169	0.05824	0.07516	0.09285	0.10731	0.12249	0.13782	0.15199	0.16655	0.178
644.375	0.02285	0.04145	0.05798	0.07487	0.09253	0.10697	0.12212	0.13743	0.15159	0.16612	0.17756
644.571	0.02263	0.0412	0.05771	0.07457	0.09221	0.10662	0.12175	0.13704	0.15118	0.16569	0.17713
644.767	0.0224	0.04096	0.05744	0.07428	0.09188	0.10628	0.12138	0.13665	0.15078	0.16526	0.17669
644.963	0.02218	0.04071	0.05718	0.07398	0.09156	0.10594	0.12101	0.13626	0.15037	0.16483	0.17625
645.159	0.02196	0.04047	0.05691	0.07369	0.09124	0.10559	0.12065	0.13587	0.14996	0.1644	0.17581
645.355	0.02174	0.04023	0.05665	0.07339	0.09092	0.10525	0.12028	0.13548	0.14955	0.16397	0.17537
645.551	0.02152	0.03999	0.05639	0.0731	0.09059	0.10491	0.11991	0.13509	0.14914	0.16353	0.17493
645.747	0.02131	0.03975	0.05612	0.07281	0.09027	0.10456	0.11954	0.1347	0.14873	0.1631	0.17449
645.943	0.02109	0.03951	0.05586	0.07252	0.08995	0.10422	0.11917	0.13431	0.14832	0.16266	0.17405
646.139	0.02088	0.03927	0.0556	0.07223	0.08963	0.10388	0.1188	0.13392	0.14791	0.16223	0.1736
646.335	0.02067	0.03903	0.05534	0.07194	0.08931	0.10354	0.11843	0.13352	0.14749	0.16179	0.17316
646.53	0.02046	0.0388	0.05508	0.07165	0.08899	0.1032	0.11806	0.13313	0.14708	0.16136	0.17271
646.726	0.02025	0.03857	0.05482	0.07136	0.08867	0.10286	0.1177	0.13274	0.14667	0.16092	0.17227
646.922	0.02004	0.03834	0.05456	0.07108	0.08836	0.10252	0.11733	0.13236	0.14626	0.16048	0.17182
647.118	0.01984	0.03811	0.05431	0.0708	0.08804	0.10218	0.11696	0.13197	0.14584	0.16005	0.17138
647.314	0.01964	0.03788	0.05405	0.07051	0.08773	0.10184	0.1166	0.13158	0.14543	0.15961	0.17093
647.509	0.01944	0.03765	0.0538	0.07023	0.08741	0.10151	0.11623	0.13119	0.14502	0.15917	0.17049
647.705	0.01924	0.03743	0.05355	0.06996	0.0871	0.10117	0.11587	0.1308	0.1446	0.15873	0.17004
647.901	0.01905	0.0372	0.0533	0.06968	0.08679	0.10084	0.11551	0.13042	0.14419	0.1583	0.1696
648.097	0.01886	0.03698	0.05305	0.0694	0.08648	0.10051	0.11515	0.13003	0.14378	0.15786	0.16915
648.292	0.01867	0.03676	0.0528	0.06913	0.08617	0.10017	0.11479	0.12965	0.14336	0.15742	0.16871
648.488	0.01848	0.03655	0.05255	0.06886	0.08586	0.09984	0.11443	0.12927	0.14295	0.15698	0.16826
648.684	0.01829	0.03633	0.05231	0.06858	0.08555	0.09951	0.11407	0.12888	0.14254	0.15655	0.16782
648.879	0.01811	0.03611	0.05206	0.06831	0.08525	0.09918	0.11371	0.1285	0.14213	0.15611	0.16737
649.075	0.01792	0.0359	0.05182	0.06805	0.08494	0.09886	0.11335	0.12812	0.14171	0.15567	0.16693
649.27	0.01774	0.03569	0.05157	0.06778	0.08464	0.09853	0.113	0.12774	0.1413	0.15523	0.16649
649.466	0.01757	0.03548	0.05133	0.06751	0.08434	0.0982	0.11264	0.12736	0.14089	0.15479	0.16604
649.662	0.01739	0.03527	0.05109	0.06725	0.08404	0.09788	0.11229	0.12698	0.14048	0.15436	0.1656
649.857	0.01722	0.03506	0.05085	0.06699	0.08374	0.09755	0.11193	0.1266	0.14006	0.15392	0.16515
650.053	0.01704	0.03485	0.05062	0.06673	0.08344	0.09723	0.11158	0.12622	0.13965	0.15348	0.16471
650.248	0.01687	0.03465	0.05038	0.06647	0.08314	0.09691	0.11123	0.12584	0.13924	0.15304	0.16426
650.444	0.0167	0.03445	0.05014	0.06621	0.08285	0.09659	0.11087	0.12546	0.13883	0.1526	0.16382
650.639	0.01654	0.03424	0.04991	0.06595	0.08255	0.09627	0.11052	0.12508	0.13841	0.15216	0.16337
650.835	0.01637	0.03404	0.04968	0.06569	0.08226	0.09595	0.11017	0.12471	0.138	0.15172	0.16293
651.03	0.01621	0.03384	0.04944	0.06544	0.08196	0.09563	0.10982	0.12433	0.13759	0.15128	0.16248
651.225	0.01604	0.03364	0.04921	0.06518	0.08167	0.09531	0.10947	0.12395	0.13718	0.15084	0.16204
651.421	0.01588	0.03345	0.04898	0.06493	0.08138	0.09499	0.10912	0.12357	0.13676	0.1504	0.16159
651.616	0.01572	0.03325	0.04875	0.06467	0.08108	0.09467	0.10877	0.12319	0.13635	0.14996	0.16115
651.812	0.01556	0.03305	0.04852	0.06442	0.08079	0.09435	0.10842	0.12281	0.13594	0.14952	0.1607
652.007	0.0154	0.03286	0.04829	0.06417	0.0805	0.09403	0.10807	0.12244	0.13552	0.14907	0.16025
652.202	0.01524	0.03266	0.04806	0.06391	0.08021	0.09371	0.10772	0.12206	0.13511	0.14863	0.1598
652.398	0.01509	0.03247	0.04783	0.06366	0.07992	0.0934	0.10737	0.12168	0.13469	0.14819	0.15935
652.593	0.01493	0.03227	0.04761	0.06341	0.07963	0.09308	0.10702	0.1213	0.13428	0.14774	0.1589
652.788	0.01478	0.03208	0.04738	0.06316	0.07934	0.09276	0.10668	0.12092	0.13386	0.14729	0.15845
652.984	0.01462	0.03189	0.04715	0.0629	0.07905	0.09244	0.10633	0.12054	0.13345	0.14685	0.158
653.179	0.01447	0.0317	0.04693	0.06265	0.07876	0.09213	0.10598	0.12016	0.13303	0.1464	0.15755
653.374	0.01432	0.0315	0.0467	0.0624	0.07848	0.09181	0.10563	0.11978	0.13261	0.14595	0.1571
653.569	0.01417	0.03131	0.04648	0.06215	0.07819	0.09149	0.10528	0.1194	0.1322	0.1455	0.15665
653.764	0.01402	0.03113	0.04626	0.0619	0.0779	0.09117	0.10493	0.11902	0.13178	0.14505	0.15619
653.96	0.01387	0.03094	0.04603	0.06165	0.07762	0.09086	0.10458	0.11864	0.13136	0.1446	0.15574
654.155	0.01372	0.03075	0.04581	0.0614	0.07733	0.09054	0.10423	0.11825	0.13094	0.14415	0.15529
654.35	0.01357	0.03056	0.04559	0.06115	0.07704	0.09022	0.10388	0.11787	0.13053	0.1437	0.15483
654.545	0.01343	0.03038	0.04537	0.0609	0.07676	0.08991	0.10353	0.11749	0.13011	0.14325	0.15437
654.74	0.01328	0.03019	0.04515	0.06065	0.07647	0.08959	0.10318	0.11711	0.12969	0.14279	0.15392
654.935	0.01314	0.03001	0.04493	0.0604	0.07619	0.08928	0.10283	0.11673	0.12927	0.14234	0.15346
655.13	0.013	0.02983	0.04472	0.06015	0.0759	0.08896	0.10249	0.11634	0.12885	0.14189	0.153
655.326	0.01285	0.02964	0.0445	0.0599	0.07562	0.08864	0.10214	0.11596	0.12844	0.14144	0.15255
655.521	0.01271	0.02946	0.04429	0.05965	0.07534	0.08833	0.10179	0.11558	0.12802	0.14098	0.15209
655.716	0.01257	0.02928	0.04407	0.0594	0.07505	0.08801	0.10144	0.1152	0.1276	0.14053	0.15163
655.911	0.01243	0.0291	0.04386	0.05916	0.07477	0.0877	0.10109	0.11482	0.12718	0.14007	0.15117
656.106	0.01229	0.02893	0.04364	0.05891	0.07449	0.08738	0.10074	0.11443	0.12676	0.13962	0.15071
656.301	0.01216	0.02875	0.04343	0.05866	0.07421	0.08707	0.10039	0.11405	0.12634	0.13916	0.15025
656.496	0.01202	0.02857	0.04322	0.05841	0.07392	0.08675	0.10005	0.11367	0.12593	0.13871	0.14979
656.691	0.01188	0.0284	0.04301	0.05817	0.07364	0.08644	0.0997	0.11328	0.12551	0.13825	0.14933
656.886	0.01175	0.02822	0.0428	0.05792	0.07336	0.08612	0.09935	0.1129	0.12509	0.1378	0.14887
657.08	0.01161	0.02805	0.04259	0.05767	0.07308	0.08581	0.099	0.11252	0.12467	0.13734	0.14841
657.275	0.01148	0.02788	0.04238	0.05742	0.0728	0.08549	0.09865	0.11213	0.12425	0.13688	0.14794
657.47	0.01135	0.0277	0.04218	0.05718	0.07251	0.08518	0.0983	0.11175	0.12383	0.13642	0.14748
657.665	0.01121	0.02753	0.04197	0.05693	0.07223	0.08486	0.09795	0.11137	0.12341	0.13597	0.14702
657.86	0.01108	0.02736	0.04176	0.05668	0.07195	0.08455	0.0976	0.11098	0.12299	0.13551	0.14655
658.055	0.01095	0.02719	0.04156	0.05644	0.07167	0.08423	0.09725	0.1106	0.12257	0.13505	0.14609
658.25	0.01082	0.02702	0.04135	0.05619	0.07139	0.08392	0.0969	0.11021	0.12215	0.13459	0.14562
658.444	0.01069	0.02685	0.04115	0.05595	0.07111	0.0836	0.09655	0.10982	0.12173	0.13413	0.14515
658.639	0.01056	0.02669	0.04094	0.0557	0.07083	0.08328	0.0962	0.10944	0.12131	0.13367	0.14469
658.834	0.01043	0.02652	0.04074	0.05545	0.07054	0.08297	0.09585	0.10905	0.12089	0.13321	0.14422
659.029	0.0103	0.02635	0.04053	0.05521	0.07026	0.08265	0.09549	0.10866	0.12047	0.13275	0.14375
659.224	0.01017	0.02618	0.04033	0.05496	0.06998	0.08233	0.09514	0.10827	0.12005	0.13229	0.14328
659.418	0.01004	0.02602	0.04013	0.05471	0.0697	0.08202	0.09479	0.10789	0.11963	0.13183	0.14281
659.613	0.00991	0.02585	0.03992	0.05446	0.06941	0.0817	0.09443	0.1075	0.1192	0.13137	0.14233
659.808	0.00978	0.02568	0.03972	0.05422	0.06913	0.08138	0.09408	0.1071	0.11878	0.13091	0.14186
660.002	0.00965	0.02552	0.03951	0.05397	0.06884	0.08106	0.09372	0.10671	0.11836	0.13044	0.14139
660.197	0.00952	0.02535	0.03931	0.05372	0.06856	0.08074	0.09336	0.10632	0.11793	0.12998	0.14091
660.392	0.0094	0.02519	0.0391	0.05347	0.06827	0.08042	0.09301	0.10593	0.11751	0.12951	0.14043
660.586	0.00927	0.02502	0.0389	0.05322	0.06799	0.0801	0.09265	0.10553	0.11708	0.12905	0.13996
660.781	0.00914	0.02485	0.0387	0.05298	0.0677	0.07978	0.09229	0.10514	0.11665	0.12858	0.13948
660.975	0.00901	0.02469	0.03849	0.05273	0.06742	0.07946	0.09193	0.10474	0.11623	0.12812	0.139
661.17	0.00888	0.02452	0.03829	0.05248	0.06713	0.07913	0.09157	0.10435	0.1158	0.12765	0.13852
661.365	0.00875	0.02436	0.03808	0.05223	0.06684	0.07881	0.09121	0.10395	0.11537	0.12718	0.13804
661.559	0.00863	0.02419	0.03788	0.05198	0.06655	0.07849	0.09085	0.10356	0.11494	0.12672	0.13756
661.754	0.0085	0.02403	0.03767	0.05173	0.06627	0.07817	0.09049	0.10316	0.11451	0.12625	0.13708
661.948	0.00837	0.02386	0.03747	0.05149	0.06598	0.07784	0.09013	0.10276	0.11408	0.12578	0.1366
662.143	0.00824	0.0237	0.03726	0.05124	0.06569	0.07752	0.08977	0.10236	0.11365	0.12531	0.13611
662.337	0.00812	0.02353	0.03706	0.05099	0.0654	0.07719	0.0894	0.10196	0.11322	0.12484	0.13563
662.532	0.00799	0.02337	0.03685	0.05074	0.06512	0.07687	0.08904	0.10157	0.11279	0.12437	0.13515
662.726	0.00787	0.0232	0.03665	0.0505	0.06483	0.07654	0.08868	0.10117	0.11236	0.1239	0.13466
662.92	0.00774	0.02304	0.03644	0.05025	0.06454	0.07622	0.08831	0.10077	0.11192	0.12343	0.13418
663.115	0.00761	0.02287	0.03624	0.05	0.06425	0.07589	0.08795	0.10036	0.11149	0.12296	0.13369
663.309	0.00749	0.02271	0.03603	0.04976	0.06396	0.07557	0.08759	0.09996	0.11105	0.12249	0.1332
663.504	0.00736	0.02254	0.03583	0.04951	0.06367	0.07524	0.08722	0.09956	0.11062	0.12202	0.13272
663.698	0.00723	0.02238	0.03562	0.04926	0.06338	0.07491	0.08686	0.09916	0.11018	0.12154	0.13223
663.892	0.00711	0.02221	0.03542	0.04902	0.06309	0.07459	0.08649	0.09876	0.10975	0.12107	0.13174
664.087	0.00698	0.02205	0.03521	0.04877	0.0628	0.07426	0.08613	0.09835	0.10931	0.1206	0.13125
664.281	0.00686	0.02188	0.035	0.04852	0.06251	0.07393	0.08576	0.09795	0.10887	0.12012	0.13076
664.475	0.00673	0.02172	0.0348	0.04828	0.06222	0.0736	0.08539	0.09755	0.10843	0.11965	0.13027
664.669	0.00661	0.02155	0.03459	0.04803	0.06193	0.07328	0.08503	0.09714	0.108	0.11917	0.12978
664.864	0.00648	0.02139	0.03439	0.04779	0.06164	0.07295	0.08466	0.09674	0.10756	0.1187	0.12929
665.058	0.00635	0.02122	0.03418	0.04754	0.06135	0.07262	0.0843	0.09633	0.10712	0.11822	0.12879
665.252	0.00623	0.02105	0.03398	0.04729	0.06105	0.07229	0.08393	0.09593	0.10668	0.11774	0.1283
665.446	0.0061	0.02089	0.03377	0.04705	0.06076	0.07196	0.08356	0.09552	0.10624	0.11727	0.12781
665.641	0.00598	0.02072	0.03357	0.0468	0.06047	0.07163	0.08319	0.09511	0.1058	0.11679	0.12731
665.835	0.00586	0.02056	0.03336	0.04656	0.06018	0.0713	0.08283	0.09471	0.10535	0.11631	0.12682
666.029	0.00573	0.02039	0.03315	0.04631	0.05989	0.07098	0.08246	0.0943	0.10491	0.11583	0.12632
666.223	0.00561	0.02023	0.03295	0.04607	0.0596	0.07065	0.08209	0.09389	0.10447	0.11536	0.12583
666.417	0.00548	0.02006	0.03274	0.04582	0.05931	0.07032	0.08173	0.09349	0.10403	0.11488	0.12533
666.611	0.00536	0.0199	0.03254	0.04558	0.05901	0.06999	0.08136	0.09308	0.10359	0.1144	0.12484
666.805	0.00524	0.01973	0.03233	0.04533	0.05872	0.06966	0.08099	0.09267	0.10314	0.11392	0.12434
666.999	0.00511	0.01957	0.03213	0.04509	0.05843	0.06933	0.08063	0.09226	0.1027	0.11344	0.12385
667.193	0.00499	0.0194	0.03193	0.04485	0.05814	0.069	0.08026	0.09186	0.10226	0.11296	0.12335
667.387	0.00487	0.01924	0.03172	0.0446	0.05785	0.06867	0.07989	0.09145	0.10182	0.11249	0.12285
667.581	0.00475	0.01908	0.03152	0.04436	0.05756	0.06835	0.07953	0.09104	0.10137	0.11201	0.12235
667.775	0.00463	0.01891	0.03131	0.04412	0.05727	0.06802	0.07916	0.09063	0.10093	0.11153	0.12186
667.969	0.00451	0.01875	0.03111	0.04388	0.05698	0.06769	0.0788	0.09023	0.10049	0.11105	0.12136
668.163	0.00439	0.01859	0.03091	0.04364	0.05669	0.06737	0.07843	0.08982	0.10004	0.11057	0.12086
668.357	0.00428	0.01843	0.03071	0.0434	0.0564	0.06704	0.07807	0.08942	0.0996	0.11009	0.12037
668.551	0.00416	0.01827	0.03051	0.04316	0.05612	0.06672	0.07771	0.08901	0.09916	0.10962	0.11987
668.745	0.00404	0.01811	0.03031	0.04292	0.05583	0.06639	0.07735	0.08861	0.09872	0.10914	0.11937
668.939	0.00393	0.01795	0.03011	0.04268	0.05555	0.06607	0.07698	0.0882	0.09828	0.10866	0.11888
669.133	0.00382	0.01779	0.02991	0.04245	0.05526	0.06575	0.07662	0.0878	0.09784	0.10819	0.11838
669.327	0.0037	0.01764	0.02972	0.04221	0.05498	0.06543	0.07627	0.0874	0.0974	0.10771	0.11789
669.521	0.00359	0.01748	0.02952	0.04198	0.0547	0.06511	0.07591	0.087	0.09696	0.10724	0.11739
669.715	0.00349	0.01733	0.02933	0.04174	0.05442	0.06479	0.07555	0.0866	0.09652	0.10676	0.1169
669.908	0.00338	0.01718	0.02913	0.04151	0.05414	0.06448	0.0752	0.0862	0.09608	0.10629	0.11641
670.102	0.00327	0.01703	0.02894	0.04128	0.05386	0.06416	0.07484	0.0858	0.09565	0.10582	0.11592
670.296	0.00317	0.01688	0.02875	0.04105	0.05358	0.06385	0.07449	0.08541	0.09521	0.10535	0.11543
670.49	0.00307	0.01673	0.02856	0.04083	0.05331	0.06353	0.07414	0.08501	0.09478	0.10488	0.11494
670.683	0.00297	0.01659	0.02837	0.0406	0.05304	0.06322	0.07379	0.08462	0.09435	0.10441	0.11445
670.877	0.00287	0.01644	0.02819	0.04038	0.05277	0.06291	0.07344	0.08423	0.09392	0.10394	0.11396
671.071	0.00277	0.0163	0.028	0.04016	0.0525	0.06261	0.0731	0.08384	0.09349	0.10347	0.11348
671.265	0.00268	0.01616	0.02782	0.03993	0.05223	0.0623	0.07275	0.08345	0.09306	0.10301	0.113
671.458	0.00259	0.01602	0.02764	0.03972	0.05196	0.062	0.07241	0.08307	0.09263	0.10255	0.11251
671.652	0.00249	0.01589	0.02746	0.0395	0.0517	0.0617	0.07207	0.08268	0.09221	0.10208	0.11203
671.846	0.00241	0.01575	0.02729	0.03929	0.05144	0.0614	0.07173	0.0823	0.09178	0.10163	0.11155
672.039	0.00232	0.01562	0.02711	0.03907	0.05118	0.0611	0.07139	0.08192	0.09136	0.10117	0.11108
672.233	0.00224	0.01549	0.02694	0.03886	0.05092	0.0608	0.07106	0.08154	0.09094	0.10071	0.1106
672.426	0.00216	0.01537	0.02677	0.03865	0.05066	0.06051	0.07072	0.08117	0.09053	0.10026	0.11013
672.62	0.00208	0.01524	0.02661	0.03845	0.05041	0.06022	0.07039	0.08079	0.09011	0.0998	0.10966
672.814	0.002	0.01512	0.02644	0.03824	0.05016	0.05993	0.07006	0.08042	0.0897	0.09935	0.10919
673.007	0.00192	0.015	0.02628	0.03804	0.04991	0.05964	0.06974	0.08005	0.08929	0.0989	0.10872
673.201	0.00185	0.01488	0.02612	0.03784	0.04966	0.05936	0.06941	0.07968	0.08888	0.09846	0.10825
673.394	0.00178	0.01476	0.02596	0.03764	0.04941	0.05907	0.06909	0.07931	0.08847	0.09801	0.10779
673.588	0.00171	0.01465	0.0258	0.03745	0.04917	0.05879	0.06876	0.07895	0.08806	0.09757	0.10733
673.781	0.00164	0.01453	0.02564	0.03725	0.04892	0.05851	0.06844	0.07858	0.08766	0.09712	0.10686
673.975	0.00158	0.01442	0.02549	0.03706	0.04868	0.05823	0.06812	0.07822	0.08725	0.09668	0.1064
674.168	0.00151	0.01431	0.02534	0.03687	0.04844	0.05795	0.06781	0.07786	0.08685	0.09624	0.10595
674.361	0.00145	0.0142	0.02518	0.03667	0.0482	0.05768	0.06749	0.0775	0.08645	0.0958	0.10549
674.555	0.00139	0.0141	0.02503	0.03648	0.04796	0.0574	0.06717	0.07714	0.08605	0.09536	0.10503
674.748	0.00133	0.01399	0.02489	0.0363	0.04773	0.05713	0.06686	0.07678	0.08565	0.09493	0.10457
674.942	0.00127	0.01388	0.02474	0.03611	0.04749	0.05685	0.06654	0.07642	0.08525	0.09449	0.10412
675.135	0.00121	0.01378	0.02459	0.03592	0.04725	0.05658	0.06623	0.07606	0.08485	0.09405	0.10366
675.328	0.00115	0.01368	0.02444	0.03573	0.04702	0.05631	0.06591	0.0757	0.08445	0.09361	0.10321
675.522	0.0011	0.01357	0.0243	0.03555	0.04678	0.05603	0.0656	0.07535	0.08406	0.09318	0.10276
675.715	0.00104	0.01347	0.02415	0.03536	0.04655	0.05576	0.06529	0.07499	0.08366	0.09274	0.1023
675.908	0.000986074	0.01337	0.02401	0.03518	0.04632	0.05549	0.06498	0.07464	0.08327	0.09231	0.10185
676.102	0.000932191	0.01327	0.02387	0.03499	0.04609	0.05522	0.06466	0.07428	0.08287	0.09188	0.1014
676.295	0.00087908	0.01318	0.02373	0.03481	0.04586	0.05495	0.06435	0.07393	0.08248	0.09144	0.10095
676.488	0.000826759	0.01308	0.02359	0.03463	0.04563	0.05468	0.06404	0.07358	0.08209	0.09101	0.1005
676.681	0.000775148	0.01298	0.02345	0.03444	0.0454	0.05441	0.06373	0.07322	0.08169	0.09058	0.10005
676.874	0.000724151	0.01288	0.02331	0.03426	0.04517	0.05415	0.06342	0.07287	0.0813	0.09015	0.0996
677.068	0.000673682	0.01279	0.02317	0.03408	0.04494	0.05388	0.06311	0.07252	0.08091	0.08971	0.09915
677.261	0.000623576	0.01269	0.02303	0.0339	0.04471	0.05361	0.0628	0.07216	0.08052	0.08928	0.0987
677.454	0.000573708	0.0126	0.02289	0.03372	0.04448	0.05334	0.06249	0.07181	0.08013	0.08885	0.09825
677.647	0.000524047	0.0125	0.02275	0.03354	0.04425	0.05307	0.06218	0.07146	0.07974	0.08842	0.0978
677.84	0.000474639	0.01241	0.02262	0.03335	0.04402	0.0528	0.06187	0.07111	0.07934	0.08799	0.09735
678.033	0.000425441	0.01231	0.02248	0.03317	0.04379	0.05253	0.06156	0.07075	0.07895	0.08755	0.0969
678.226	0.000376311	0.01222	0.02234	0.03299	0.04356	0.05226	0.06125	0.0704	0.07856	0.08712	0.09645
678.42	0.000327116	0.01212	0.0222	0.03281	0.04333	0.05199	0.06094	0.07005	0.07817	0.08669	0.096
678.613	0.000277744	0.01203	0.02207	0.03263	0.0431	0.05172	0.06063	0.0697	0.07778	0.08626	0.09555
678.806	0.000228185	0.01193	0.02193	0.03245	0.04288	0.05145	0.06031	0.06934	0.07739	0.08582	0.0951
678.999	0.000178571	0.01184	0.02179	0.03226	0.04265	0.05118	0.06	0.06899	0.077	0.08539	0.09465
679.192	0.000128958	0.01174	0.02166	0.03208	0.04242	0.05091	0.05969	0.06864	0.0766	0.08495	0.0942
679.385	7.93228e-05	0.01164	0.02152	0.0319	0.04219	0.05064	0.05938	0.06828	0.07621	0.08452	0.09375
679.578	2.97364e-05	0.01155	0.02138	0.03171	0.04196	0.05037	0.05906	0.06793	0.07582	0.08409	0.0933
679.771	-1.97479e-05	0.01145	0.02125	0.03153	0.04173	0.0501	0.05875	0.06758	0.07543	0.08365	0.09284
679.964	-6.91196e-05	0.01136	0.02111	0.03135	0.0415	0.04983	0.05844	0.06722	0.07504	0.08322	0.09239
680.156	-0.00011832	0.01126	0.02097	0.03116	0.04127	0.04956	0.05812	0.06687	0.07464	0.08278	0.09194
680.349	-0.000167187	0.01117	0.02084	0.03098	0.04104	0.04929	0.05781	0.06651	0.07425	0.08235	0.09149
680.542	-0.00021549	0.01107	0.0207	0.0308	0.04081	0.04902	0.0575	0.06616	0.07386	0.08191	0.09104
680.735	-0.000263077	0.01098	0.02057	0.03062	0.04059	0.04875	0.05719	0.06581	0.07347	0.08148	0.09059
680.928	-0.000310014	0.01089	0.02043	0.03044	0.04036	0.04848	0.05688	0.06546	0.07308	0.08105	0.09014
681.121	-0.000356412	0.0108	0.0203	0.03026	0.04013	0.04821	0.05657	0.06511	0.07269	0.08061	0.08969
681.314	-0.000402182	0.0107	0.02017	0.03008	0.03991	0.04794	0.05625	0.06476	0.0723	0.08018	0.08924
681.506	-0.000447204	0.01061	0.02003	0.0299	0.03968	0.04767	0.05595	0.06441	0.07192	0.07975	0.0888
681.699	-0.000491495	0.01052	0.0199	0.02972	0.03946	0.04741	0.05564	0.06406	0.07153	0.07932	0.08835
681.892	-0.000534981	0.01044	0.01977	0.02954	0.03924	0.04714	0.05533	0.06371	0.07114	0.07889	0.0879
682.085	-0.000577371	0.01035	0.01964	0.02936	0.03901	0.04688	0.05502	0.06336	0.07076	0.07846	0.08746
682.278	-0.000618454	0.01026	0.01952	0.02919	0.03879	0.04661	0.05472	0.06301	0.07037	0.07803	0.08701
682.47	-0.000658215	0.01018	0.01939	0.02901	0.03857	0.04635	0.05441	0.06267	0.06999	0.07761	0.08657
682.663	-0.00069666	0.01009	0.01926	0.02884	0.03836	0.04609	0.05411	0.06232	0.06961	0.07718	0.08613
682.856	-0.00073382	0.01001	0.01914	0.02867	0.03814	0.04583	0.05381	0.06198	0.06923	0.07676	0.08569
683.048	-0.000769687	0.00993	0.01901	0.0285	0.03792	0.04557	0.05351	0.06164	0.06885	0.07633	0.08525
683.241	-0.00080415	0.00985	0.01889	0.02833	0.03771	0.04532	0.05321	0.0613	0.06847	0.07591	0.08481
683.434	-0.000837239	0.00977	0.01877	0.02817	0.0375	0.04506	0.05291	0.06097	0.06809	0.07549	0.08438
683.626	-0.000869028	0.00969	0.01865	0.028	0.03729	0.04481	0.05262	0.06063	0.06772	0.07507	0.08394
683.819	-0.000899474	0.00962	0.01853	0.02784	0.03708	0.04456	0.05232	0.06029	0.06734	0.07466	0.08351
684.011	-0.000928478	0.00954	0.01841	0.02767	0.03687	0.04431	0.05203	0.05996	0.06697	0.07424	0.08308
684.204	-0.000955993	0.00947	0.0183	0.02751	0.03666	0.04406	0.05174	0.05963	0.0666	0.07383	0.08265
684.397	-0.00098205	0.0094	0.01818	0.02735	0.03646	0.04381	0.05145	0.0593	0.06623	0.07341	0.08222
684.589	-0.00101	0.00933	0.01807	0.02719	0.03625	0.04356	0.05116	0.05897	0.06586	0.073	0.08179
684.782	-0.00103	0.00926	0.01796	0.02704	0.03605	0.04332	0.05087	0.05864	0.06549	0.07259	0.08137
684.974	-0.00105	0.00919	0.01785	0.02688	0.03585	0.04308	0.05059	0.05832	0.06513	0.07219	0.08094
685.167	-0.00107	0.00913	0.01774	0.02673	0.03565	0.04284	0.05031	0.05799	0.06476	0.07178	0.08052
685.359	-0.00109	0.00906	0.01763	0.02658	0.03545	0.0426	0.05002	0.05767	0.0644	0.07137	0.0801
685.552	-0.00111	0.009	0.01752	0.02643	0.03525	0.04236	0.04974	0.05735	0.06404	0.07097	0.07968
685.744	-0.00112	0.00894	0.01742	0.02628	0.03506	0.04212	0.04946	0.05703	0.06368	0.07057	0.07926
685.936	-0.00114	0.00888	0.01731	0.02613	0.03486	0.04189	0.04919	0.05671	0.06332	0.07017	0.07884
686.129	-0.00115	0.00882	0.01721	0.02598	0.03467	0.04166	0.04891	0.05639	0.06296	0.06977	0.07843
686.321	-0.00117	0.00876	0.01711	0.02584	0.03448	0.04142	0.04863	0.05608	0.0626	0.06937	0.07801
686.514	-0.00118	0.0087	0.01701	0.02569	0.03428	0.04119	0.04836	0.05576	0.06224	0.06897	0.0776
686.706	-0.00119	0.00864	0.01691	0.02555	0.03409	0.04096	0.04808	0.05545	0.06189	0.06857	0.07718
686.898	-0.0012	0.00859	0.01681	0.02541	0.0339	0.04074	0.04781	0.05513	0.06154	0.06818	0.07677
687.091	-0.0012	0.00854	0.01671	0.02526	0.03372	0.04051	0.04754	0.05482	0.06118	0.06779	0.07636
687.283	-0.00121	0.00848	0.01661	0.02512	0.03353	0.04028	0.04727	0.05451	0.06083	0.06739	0.07595
687.475	-0.00122	0.00843	0.01652	0.02498	0.03334	0.04006	0.047	0.0542	0.06048	0.067	0.07554
687.667	-0.00122	0.00838	0.01642	0.02485	0.03316	0.03983	0.04673	0.05389	0.06013	0.06661	0.07513
687.86	-0.00123	0.00833	0.01632	0.02471	0.03297	0.03961	0.04647	0.05358	0.05978	0.06622	0.07473
688.052	-0.00123	0.00828	0.01623	0.02457	0.03278	0.03938	0.0462	0.05327	0.05943	0.06583	0.07432
688.244	-0.00124	0.00823	0.01614	0.02443	0.0326	0.03916	0.04593	0.05296	0.05908	0.06544	0.07391
688.436	-0.00124	0.00818	0.01604	0.02429	0.03241	0.03894	0.04566	0.05265	0.05873	0.06505	0.07351
688.628	-0.00124	0.00813	0.01595	0.02416	0.03223	0.03871	0.0454	0.05235	0.05838	0.06467	0.0731
688.821	-0.00125	0.00808	0.01585	0.02402	0.03204	0.03849	0.04513	0.05204	0.05804	0.06428	0.0727
689.013	-0.00125	0.00803	0.01576	0.02388	0.03186	0.03827	0.04487	0.05173	0.05769	0.06389	0.07229
689.205	-0.00125	0.00798	0.01567	0.02375	0.03167	0.03805	0.0446	0.05142	0.05734	0.0635	0.07189
689.397	-0.00125	0.00794	0.01558	0.02361	0.03149	0.03783	0.04434	0.05112	0.057	0.06312	0.07148
689.589	-0.00126	0.00789	0.01549	0.02348	0.03131	0.03761	0.04407	0.05081	0.05665	0.06273	0.07108
689.781	-0.00126	0.00784	0.0154	0.02334	0.03112	0.03739	0.04381	0.0505	0.05631	0.06234	0.07068
689.973	-0.00126	0.00779	0.01531	0.02321	0.03094	0.03717	0.04355	0.0502	0.05596	0.06196	0.07027
690.165	-0.00126	0.00775	0.01521	0.02307	0.03076	0.03695	0.04328	0.04989	0.05562	0.06157	0.06987
690.357	-0.00126	0.0077	0.01512	0.02294	0.03057	0.03673	0.04302	0.04959	0.05527	0.06119	0.06947
690.549	-0.00126	0.00765	0.01503	0.0228	0.03039	0.03651	0.04275	0.04928	0.05493	0.0608	0.06907
690.741	-0.00127	0.0076	0.01494	0.02267	0.0302	0.03628	0.04249	0.04897	0.05459	0.06042	0.06866
690.933	-0.00127	0.00756	0.01485	0.02253	0.03002	0.03606	0.04223	0.04867	0.05424	0.06003	0.06826
691.125	-0.00127	0.00751	0.01476	0.0224	0.02984	0.03584	0.04196	0.04836	0.0539	0.05964	0.06786
691.317	-0.00127	0.00746	0.01467	0.02226	0.02965	0.03562	0.0417	0.04805	0.05355	0.05926	0.06746
691.509	-0.00128	0.00741	0.01458	0.02212	0.02947	0.0354	0.04143	0.04775	0.05321	0.05887	0.06705
691.701	-0.00128	0.00737	0.01449	0.02199	0.02928	0.03518	0.04117	0.04744	0.05287	0.05848	0.06665
691.893	-0.00128	0.00732	0.0144	0.02185	0.02909	0.03495	0.0409	0.04713	0.05252	0.0581	0.06625
692.085	-0.00129	0.00727	0.01431	0.02171	0.02891	0.03473	0.04063	0.04682	0.05218	0.05771	0.06584
692.277	-0.00129	0.00722	0.01421	0.02157	0.02872	0.03451	0.04037	0.04651	0.05183	0.05732	0.06544
692.469	-0.00129	0.00717	0.01412	0.02144	0.02854	0.03428	0.0401	0.0462	0.05149	0.05693	0.06504
692.66	-0.0013	0.00712	0.01403	0.0213	0.02835	0.03406	0.03983	0.04589	0.05114	0.05655	0.06464
692.852	-0.0013	0.00707	0.01394	0.02116	0.02816	0.03383	0.03957	0.04558	0.0508	0.05616	0.06423
693.044	-0.00131	0.00702	0.01384	0.02102	0.02797	0.03361	0.0393	0.04528	0.05045	0.05577	0.06383
693.236	-0.00131	0.00697	0.01375	0.02088	0.02779	0.03338	0.03903	0.04497	0.05011	0.05538	0.06343
693.428	-0.00132	0.00692	0.01366	0.02074	0.0276	0.03316	0.03877	0.04466	0.04976	0.05499	0.06302
693.619	-0.00132	0.00687	0.01357	0.02061	0.02741	0.03293	0.0385	0.04435	0.04942	0.05461	0.06262
693.811	-0.00133	0.00682	0.01348	0.02047	0.02723	0.03271	0.03824	0.04404	0.04908	0.05422	0.06222
694.003	-0.00133	0.00677	0.01339	0.02033	0.02704	0.03248	0.03797	0.04374	0.04874	0.05383	0.06182
694.194	-0.00133	0.00672	0.0133	0.02019	0.02686	0.03226	0.03771	0.04343	0.04839	0.05345	0.06142
694.386	-0.00134	0.00667	0.01321	0.02006	0.02667	0.03204	0.03744	0.04312	0.04805	0.05307	0.06102
694.578	-0.00134	0.00663	0.01312	0.01992	0.02649	0.03181	0.03718	0.04282	0.04771	0.05268	0.06062
694.769	-0.00134	0.00658	0.01303	0.01979	0.0263	0.03159	0.03692	0.04251	0.04737	0.0523	0.06023
694.961	-0.00135	0.00653	0.01294	0.01965	0.02612	0.03137	0.03665	0.04221	0.04703	0.05191	0.05983
695.153	-0.00135	0.00648	0.01285	0.01952	0.02594	0.03114	0.03639	0.04191	0.0467	0.05153	0.05943
695.344	-0.00135	0.00644	0.01276	0.01938	0.02576	0.03092	0.03613	0.0416	0.04636	0.05115	0.05904
695.536	-0.00135	0.00639	0.01267	0.01925	0.02557	0.0307	0.03587	0.0413	0.04602	0.05077	0.05864
695.727	-0.00135	0.00634	0.01258	0.01911	0.02539	0.03048	0.03561	0.041	0.04568	0.05039	0.05825
695.919	-0.00135	0.0063	0.0125	0.01898	0.02521	0.03026	0.03535	0.0407	0.04535	0.05001	0.05786
696.111	-0.00135	0.00625	0.01241	0.01885	0.02503	0.03004	0.03509	0.0404	0.04501	0.04963	0.05746
696.302	-0.00135	0.00621	0.01232	0.01872	0.02485	0.02982	0.03483	0.0401	0.04467	0.04925	0.05707
696.494	-0.00135	0.00616	0.01223	0.01859	0.02468	0.0296	0.03457	0.03981	0.04434	0.04887	0.05668
696.685	-0.00135	0.00612	0.01215	0.01846	0.0245	0.02938	0.03432	0.03951	0.04401	0.0485	0.05629
696.876	-0.00135	0.00607	0.01206	0.01833	0.02432	0.02917	0.03406	0.03921	0.04367	0.04812	0.05591
697.068	-0.00135	0.00603	0.01198	0.0182	0.02415	0.02895	0.03381	0.03892	0.04334	0.04775	0.05552
697.259	-0.00134	0.00599	0.01189	0.01807	0.02397	0.02874	0.03356	0.03863	0.04301	0.04737	0.05514
697.451	-0.00134	0.00595	0.01181	0.01794	0.0238	0.02852	0.03331	0.03834	0.04268	0.047	0.05475
697.642	-0.00133	0.00591	0.01173	0.01782	0.02363	0.02831	0.03306	0.03805	0.04235	0.04663	0.05437
697.834	-0.00133	0.00587	0.01165	0.0177	0.02346	0.0281	0.03281	0.03776	0.04203	0.04626	0.05399
698.025	-0.00132	0.00583	0.01157	0.01757	0.02329	0.02789	0.03256	0.03747	0.0417	0.0459	0.05361
698.216	-0.00131	0.0058	0.01149	0.01745	0.02312	0.02768	0.03232	0.03719	0.04138	0.04553	0.05323
698.408	-0.0013	0.00576	0.01141	0.01733	0.02295	0.02748	0.03208	0.0369	0.04106	0.04517	0.05286
698.599	-0.00128	0.00573	0.01134	0.01722	0.02279	0.02727	0.03184	0.03662	0.04073	0.04481	0.05248
698.79	-0.00127	0.0057	0.01126	0.0171	0.02263	0.02707	0.0316	0.03634	0.04042	0.04445	0.05211
698.981	-0.00125	0.00567	0.01119	0.01698	0.02247	0.02687	0.03136	0.03607	0.0401	0.04409	0.05174
699.173	-0.00124	0.00564	0.01112	0.01687	0.02231	0.02667	0.03113	0.03579	0.03978	0.04374	0.05137
699.364	-0.00122	0.00561	0.01105	0.01676	0.02215	0.02647	0.03089	0.03552	0.03947	0.04339	0.05101
699.555	-0.0012	0.00559	0.01098	0.01665	0.02199	0.02628	0.03066	0.03525	0.03916	0.04304	0.05065
699.746	-0.00117	0.00556	0.01091	0.01654	0.02184	0.02608	0.03043	0.03498	0.03885	0.04269	0.05028
699.938	-0.00115	0.00554	0.01084	0.01644	0.02169	0.02589	0.03021	0.03471	0.03854	0.04234	0.04992
700.129	-0.00113	0.00552	0.01078	0.01633	0.02154	0.0257	0.02998	0.03445	0.03823	0.042	0.04956
700.32	-0.0011	0.0055	0.01072	0.01623	0.02139	0.02551	0.02975	0.03418	0.03793	0.04165	0.04921
700.511	-0.00107	0.00548	0.01065	0.01613	0.02124	0.02533	0.02953	0.03392	0.03762	0.04131	0.04885
700.702	-0.00105	0.00546	0.01059	0.01602	0.02109	0.02514	0.02931	0.03366	0.03732	0.04097	0.0485
700.893	-0.00102	0.00545	0.01053	0.01592	0.02095	0.02496	0.02909	0.0334	0.03702	0.04064	0.04815
701.084	-0.00098499	0.00543	0.01048	0.01583	0.0208	0.02478	0.02887	0.03315	0.03672	0.0403	0.0478
701.275	-0.000953339	0.00542	0.01042	0.01573	0.02066	0.0246	0.02866	0.03289	0.03643	0.03997	0.04745
701.466	-0.000920837	0.00541	0.01036	0.01563	0.02052	0.02442	0.02844	0.03264	0.03613	0.03963	0.0471
701.658	-0.000887539	0.0054	0.01031	0.01554	0.02038	0.02424	0.02823	0.03238	0.03584	0.0393	0.04675
701.849	-0.000853454	0.00539	0.01025	0.01544	0.02024	0.02407	0.02801	0.03213	0.03554	0.03897	0.04641
702.04	-0.000818558	0.00538	0.0102	0.01535	0.0201	0.02389	0.0278	0.03188	0.03525	0.03865	0.04606
702.231	-0.00078293	0.00537	0.01015	0.01526	0.01997	0.02372	0.02759	0.03163	0.03496	0.03832	0.04572
702.422	-0.000746746	0.00537	0.0101	0.01517	0.01983	0.02354	0.02738	0.03139	0.03467	0.03799	0.04538
702.612	-0.000710071	0.00536	0.01005	0.01508	0.01969	0.02337	0.02717	0.03114	0.03438	0.03767	0.04504
702.803	-0.000672876	0.00535	0.01	0.01499	0.01956	0.0232	0.02696	0.03089	0.0341	0.03735	0.0447
702.994	-0.000635251	0.00535	0.00995	0.0149	0.01942	0.02303	0.02675	0.03064	0.03381	0.03702	0.04436
703.185	-0.000597352	0.00534	0.0099	0.01481	0.01929	0.02286	0.02654	0.0304	0.03352	0.0367	0.04402
703.376	-0.000559219	0.00534	0.00986	0.01472	0.01916	0.02269	0.02633	0.03015	0.03324	0.03638	0.04368
703.567	-0.000520747	0.00534	0.00981	0.01463	0.01902	0.02252	0.02613	0.02991	0.03296	0.03606	0.04334
703.758	-0.000481876	0.00533	0.00976	0.01454	0.01889	0.02236	0.02592	0.02967	0.03267	0.03574	0.043
703.949	-0.000442656	0.00533	0.00972	0.01445	0.01876	0.02219	0.02571	0.02942	0.03239	0.03543	0.04267
704.14	-0.000403189	0.00533	0.00967	0.01436	0.01863	0.02202	0.02551	0.02918	0.03211	0.03511	0.04233
704.33	-0.000363531	0.00533	0.00963	0.01428	0.0185	0.02186	0.0253	0.02894	0.03183	0.0348	0.042
704.521	-0.000323661	0.00532	0.00958	0.01419	0.01837	0.02169	0.0251	0.0287	0.03155	0.03448	0.04166
704.712	-0.000283594	0.00532	0.00954	0.0141	0.01824	0.02153	0.0249	0.02846	0.03128	0.03417	0.04133
704.903	-0.000243394	0.00532	0.0095	0.01402	0.01811	0.02136	0.02469	0.02822	0.031	0.03385	0.04099
705.093	-0.000202982	0.00532	0.00945	0.01393	0.01798	0.0212	0.02449	0.02798	0.03072	0.03354	0.04066
705.284	-0.000162279	0.00532	0.00941	0.01385	0.01785	0.02104	0.02428	0.02774	0.03045	0.03323	0.04033
705.475	-0.000121304	0.00532	0.00937	0.01376	0.01773	0.02087	0.02408	0.0275	0.03017	0.03292	0.04
705.665	-8.0068e-05	0.00532	0.00933	0.01368	0.0176	0.02071	0.02388	0.02726	0.0299	0.03261	0.03967
705.856	-3.86157e-05	0.00532	0.00929	0.01359	0.01747	0.02055	0.02368	0.02702	0.02963	0.0323	0.03934
706.047	3.12502e-06	0.00532	0.00924	0.01351	0.01734	0.02039	0.02348	0.02678	0.02936	0.03199	0.03901
706.237	4.5178e-05	0.00532	0.0092	0.01342	0.01722	0.02023	0.02327	0.02654	0.02908	0.03168	0.03868
706.428	8.75774e-05	0.00532	0.00916	0.01334	0.01709	0.02007	0.02307	0.02631	0.02882	0.03138	0.03835
706.619	0.000130476	0.00532	0.00913	0.01326	0.01697	0.01991	0.02287	0.02607	0.02855	0.03107	0.03802
706.809	0.000174003	0.00533	0.00909	0.01318	0.01684	0.01975	0.02268	0.02584	0.02828	0.03077	0.0377
707	0.000218242	0.00533	0.00905	0.0131	0.01672	0.01959	0.02248	0.0256	0.02802	0.03046	0.03737
707.19	0.000263228	0.00533	0.00901	0.01302	0.0166	0.01943	0.02228	0.02537	0.02775	0.03016	0.03705
707.381	0.000308954	0.00534	0.00898	0.01294	0.01648	0.01928	0.02208	0.02514	0.02749	0.02986	0.03672
707.571	0.000355429	0.00534	0.00895	0.01286	0.01636	0.01912	0.02189	0.02491	0.02723	0.02956	0.0364
707.762	0.000402688	0.00535	0.00891	0.01279	0.01624	0.01897	0.0217	0.02468	0.02697	0.02927	0.03608
707.952	0.000450716	0.00536	0.00888	0.01271	0.01612	0.01882	0.0215	0.02445	0.02671	0.02897	0.03576
708.143	0.000499488	0.00536	0.00885	0.01264	0.01601	0.01867	0.02131	0.02422	0.02646	0.02868	0.03545
708.333	0.000548993	0.00537	0.00882	0.01256	0.01589	0.01852	0.02112	0.024	0.0262	0.02839	0.03513
708.524	0.000599243	0.00538	0.00879	0.01249	0.01578	0.01837	0.02093	0.02377	0.02595	0.0281	0.03482
708.714	0.000650223	0.00539	0.00876	0.01242	0.01566	0.01822	0.02074	0.02355	0.02569	0.02781	0.0345
708.905	0.000701965	0.00541	0.00874	0.01235	0.01555	0.01807	0.02055	0.02333	0.02544	0.02752	0.03419
709.095	0.000754526	0.00542	0.00871	0.01228	0.01544	0.01792	0.02037	0.0231	0.02519	0.02723	0.03388
709.285	0.000807934	0.00543	0.00868	0.01221	0.01533	0.01778	0.02018	0.02288	0.02495	0.02695	0.03357
709.476	0.000862207	0.00544	0.00866	0.01214	0.01522	0.01763	0.02	0.02266	0.0247	0.02666	0.03326
709.666	0.000917335	0.00546	0.00864	0.01207	0.01511	0.01749	0.01982	0.02245	0.02446	0.02638	0.03296
709.856	0.000973376	0.00547	0.00861	0.01201	0.01501	0.01735	0.01963	0.02223	0.02421	0.0261	0.03265
710.047	0.00103	0.00549	0.00859	0.01194	0.0149	0.0172	0.01945	0.02201	0.02397	0.02582	0.03235
710.237	0.00109	0.00551	0.00857	0.01188	0.0148	0.01706	0.01928	0.0218	0.02373	0.02555	0.03205
710.427	0.00115	0.00553	0.00855	0.01182	0.01469	0.01693	0.0191	0.02159	0.02349	0.02527	0.03175
710.617	0.00121	0.00555	0.00854	0.01176	0.01459	0.01679	0.01892	0.02138	0.02325	0.025	0.03145
710.808	0.00127	0.00557	0.00852	0.0117	0.01449	0.01665	0.01875	0.02117	0.02302	0.02473	0.03115
710.998	0.00133	0.00559	0.0085	0.01164	0.01439	0.01652	0.01858	0.02096	0.02278	0.02445	0.03086
711.188	0.0014	0.00562	0.00849	0.01159	0.0143	0.01639	0.01841	0.02075	0.02255	0.02419	0.03057
711.378	0.00146	0.00564	0.00848	0.01153	0.0142	0.01625	0.01824	0.02055	0.02232	0.02392	0.03028
711.568	0.00153	0.00567	0.00846	0.01148	0.01411	0.01612	0.01807	0.02035	0.02209	0.02365	0.02999
711.759	0.00159	0.00569	0.00845	0.01143	0.01401	0.016	0.01791	0.02014	0.02186	0.02339	0.0297
711.949	0.00166	0.00572	0.00844	0.01138	0.01392	0.01587	0.01774	0.01994	0.02163	0.02312	0.02942
712.139	0.00173	0.00575	0.00843	0.01133	0.01383	0.01574	0.01758	0.01974	0.02141	0.02286	0.02914
712.329	0.0018	0.00578	0.00842	0.01128	0.01374	0.01562	0.01742	0.01955	0.02118	0.0226	0.02885
712.519	0.00187	0.00581	0.00841	0.01123	0.01365	0.01549	0.01726	0.01935	0.02096	0.02234	0.02857
712.709	0.00194	0.00583	0.0084	0.01119	0.01357	0.01537	0.0171	0.01915	0.02073	0.02208	0.0283
712.899	0.00201	0.00587	0.00839	0.01114	0.01348	0.01525	0.01695	0.01896	0.02051	0.02182	0.02802
713.089	0.00208	0.0059	0.00839	0.0111	0.0134	0.01513	0.01679	0.01876	0.02029	0.02156	0.02774
713.279	0.00216	0.00593	0.00838	0.01105	0.01331	0.01501	0.01663	0.01857	0.02006	0.0213	0.02747
713.469	0.00223	0.00596	0.00837	0.01101	0.01323	0.01489	0.01648	0.01838	0.01984	0.02105	0.02719
713.659	0.0023	0.00599	0.00836	0.01097	0.01314	0.01477	0.01632	0.01818	0.01962	0.02079	0.02692
713.849	0.00237	0.00602	0.00836	0.01092	0.01306	0.01465	0.01617	0.01799	0.0194	0.02054	0.02665
714.039	0.00245	0.00605	0.00835	0.01088	0.01298	0.01453	0.01602	0.0178	0.01919	0.02028	0.02638
714.229	0.00252	0.00609	0.00834	0.01084	0.0129	0.01441	0.01587	0.01761	0.01897	0.02003	0.0261
714.419	0.00259	0.00612	0.00834	0.0108	0.01281	0.0143	0.01572	0.01742	0.01875	0.01977	0.02583
714.609	0.00267	0.00615	0.00833	0.01076	0.01273	0.01418	0.01557	0.01723	0.01853	0.01952	0.02557
714.799	0.00274	0.00619	0.00833	0.01072	0.01265	0.01406	0.01542	0.01704	0.01831	0.01926	0.0253
714.989	0.00282	0.00622	0.00832	0.01068	0.01257	0.01395	0.01527	0.01686	0.01809	0.01901	0.02503
715.178	0.00289	0.00625	0.00831	0.01064	0.01249	0.01383	0.01512	0.01667	0.01788	0.01876	0.02476
715.368	0.00297	0.00629	0.00831	0.0106	0.01241	0.01372	0.01497	0.01648	0.01766	0.01851	0.0245
715.558	0.00304	0.00632	0.0083	0.01056	0.01233	0.01361	0.01482	0.0163	0.01744	0.01825	0.02423
715.748	0.00312	0.00635	0.0083	0.01052	0.01225	0.01349	0.01468	0.01611	0.01723	0.018	0.02397
715.938	0.00319	0.00639	0.00829	0.01048	0.01217	0.01338	0.01453	0.01592	0.01701	0.01775	0.0237
716.127	0.00327	0.00642	0.00829	0.01044	0.01209	0.01327	0.01438	0.01574	0.01679	0.0175	0.02344
716.317	0.00334	0.00646	0.00828	0.01041	0.01202	0.01315	0.01424	0.01556	0.01658	0.01725	0.02318
716.507	0.00342	0.00649	0.00828	0.01037	0.01194	0.01304	0.01409	0.01537	0.01636	0.017	0.02292
716.697	0.00349	0.00653	0.00827	0.01033	0.01186	0.01293	0.01395	0.01519	0.01615	0.01675	0.02266
716.886	0.00357	0.00656	0.00827	0.01029	0.01178	0.01282	0.0138	0.01501	0.01593	0.0165	0.0224
717.076	0.00364	0.0066	0.00827	0.01026	0.01171	0.01271	0.01366	0.01483	0.01572	0.01625	0.02214
717.266	0.00372	0.00663	0.00826	0.01022	0.01163	0.0126	0.01352	0.01465	0.0155	0.016	0.02188
717.455	0.00379	0.00667	0.00826	0.01019	0.01155	0.01249	0.01337	0.01446	0.01529	0.01576	0.02162
717.645	0.00387	0.0067	0.00826	0.01015	0.01148	0.01238	0.01323	0.01428	0.01507	0.01551	0.02136
717.834	0.00394	0.00674	0.00825	0.01011	0.0114	0.01227	0.01309	0.0141	0.01486	0.01526	0.0211
718.024	0.00402	0.00677	0.00825	0.01008	0.01132	0.01216	0.01294	0.01392	0.01464	0.01501	0.02084
718.214	0.00409	0.0068	0.00824	0.01004	0.01125	0.01205	0.0128	0.01375	0.01443	0.01477	0.02058
718.403	0.00417	0.00684	0.00824	0.01001	0.01117	0.01194	0.01266	0.01357	0.01422	0.01452	0.02033
718.593	0.00424	0.00687	0.00824	0.00997	0.01109	0.01183	0.01252	0.01339	0.014	0.01427	0.02007
718.782	0.00432	0.00691	0.00823	0.00994	0.01102	0.01172	0.01237	0.01321	0.01379	0.01403	0.01981
718.972	0.00439	0.00694	0.00823	0.0099	0.01094	0.01161	0.01223	0.01304	0.01358	0.01378	0.01956
719.161	0.00447	0.00698	0.00823	0.00987	0.01087	0.0115	0.01209	0.01286	0.01337	0.01353	0.0193
719.351	0.00455	0.00702	0.00823	0.00983	0.01079	0.0114	0.01195	0.01268	0.01315	0.01329	0.01905
719.54	0.00462	0.00705	0.00823	0.0098	0.01072	0.01129	0.01181	0.01251	0.01294	0.01304	0.01879
719.73	0.0047	0.00709	0.00822	0.00977	0.01064	0.01118	0.01167	0.01234	0.01273	0.0128	0.01854
719.919	0.00477	0.00712	0.00822	0.00973	0.01057	0.01108	0.01153	0.01216	0.01252	0.01256	0.01828
720.109	0.00485	0.00716	0.00822	0.0097	0.01049	0.01097	0.01139	0.01199	0.01231	0.01232	0.01803
720.298	0.00493	0.0072	0.00822	0.00967	0.01042	0.01087	0.01126	0.01182	0.01211	0.01207	0.01778
720.487	0.00501	0.00724	0.00822	0.00964	0.01035	0.01076	0.01112	0.01165	0.0119	0.01183	0.01753
720.677	0.00508	0.00727	0.00822	0.00961	0.01028	0.01066	0.01098	0.01148	0.01169	0.01159	0.01728
720.866	0.00516	0.00731	0.00822	0.00958	0.01021	0.01056	0.01085	0.01131	0.01149	0.01135	0.01703
721.055	0.00524	0.00735	0.00823	0.00955	0.01014	0.01045	0.01071	0.01114	0.01128	0.01112	0.01678
721.245	0.00532	0.00739	0.00823	0.00952	0.01007	0.01035	0.01058	0.01098	0.01108	0.01088	0.01653
721.434	0.0054	0.00743	0.00823	0.00949	0.01	0.01025	0.01044	0.01081	0.01088	0.01064	0.01628
721.623	0.00548	0.00747	0.00824	0.00946	0.00993	0.01015	0.01031	0.01065	0.01067	0.01041	0.01604
721.812	0.00556	0.00751	0.00824	0.00944	0.00986	0.01005	0.01018	0.01048	0.01047	0.01017	0.01579
722.002	0.00564	0.00755	0.00825	0.00941	0.00979	0.00995	0.01005	0.01032	0.01027	0.00994	0.01555
722.191	0.00572	0.0076	0.00825	0.00939	0.00973	0.00986	0.00992	0.01016	0.01008	0.00971	0.01531
722.38	0.00581	0.00764	0.00826	0.00936	0.00966	0.00976	0.00979	0.01	0.00988	0.00948	0.01507
722.569	0.00589	0.00769	0.00827	0.00934	0.0096	0.00967	0.00967	0.00984	0.00968	0.00925	0.01483
722.758	0.00598	0.00773	0.00828	0.00932	0.00954	0.00958	0.00954	0.00968	0.00949	0.00902	0.01459
722.948	0.00606	0.00778	0.0083	0.0093	0.00948	0.00948	0.00941	0.00953	0.0093	0.00879	0.01435
723.137	0.00615	0.00783	0.00831	0.00928	0.00942	0.00939	0.00929	0.00937	0.0091	0.00857	0.01411
723.326	0.00624	0.00788	0.00832	0.00926	0.00936	0.0093	0.00917	0.00922	0.00891	0.00834	0.01388
723.515	0.00633	0.00792	0.00834	0.00924	0.00931	0.00922	0.00905	0.00906	0.00873	0.00812	0.01365
723.704	0.00642	0.00798	0.00836	0.00923	0.00925	0.00913	0.00893	0.00891	0.00854	0.0079	0.01341
723.893	0.00651	0.00803	0.00837	0.00921	0.00919	0.00904	0.00881	0.00876	0.00835	0.00768	0.01318
724.082	0.0066	0.00808	0.00839	0.00919	0.00914	0.00896	0.00869	0.00861	0.00817	0.00746	0.01295
724.271	0.00669	0.00813	0.00841	0.00918	0.00909	0.00887	0.00858	0.00847	0.00798	0.00725	0.01273
724.46	0.00678	0.00819	0.00843	0.00917	0.00903	0.00879	0.00846	0.00832	0.0078	0.00703	0.0125
724.649	0.00687	0.00824	0.00845	0.00915	0.00898	0.00871	0.00835	0.00817	0.00762	0.00682	0.01227
724.838	0.00696	0.00829	0.00847	0.00914	0.00893	0.00862	0.00823	0.00803	0.00744	0.0066	0.01205
725.027	0.00705	0.00835	0.0085	0.00913	0.00888	0.00854	0.00812	0.00788	0.00726	0.00639	0.01182
725.216	0.00715	0.0084	0.00852	0.00912	0.00883	0.00846	0.00801	0.00774	0.00708	0.00618	0.0116
725.405	0.00724	0.00846	0.00854	0.00911	0.00879	0.00838	0.0079	0.0076	0.0069	0.00597	0.01138
725.594	0.00733	0.00852	0.00857	0.0091	0.00874	0.0083	0.00778	0.00746	0.00673	0.00576	0.01116
725.783	0.00743	0.00857	0.00859	0.00909	0.00869	0.00823	0.00768	0.00732	0.00655	0.00555	0.01094
725.972	0.00752	0.00863	0.00862	0.00908	0.00865	0.00815	0.00757	0.00718	0.00638	0.00534	0.01072
726.161	0.00762	0.00869	0.00865	0.00907	0.0086	0.00808	0.00746	0.00704	0.0062	0.00514	0.0105
726.35	0.00771	0.00875	0.00867	0.00906	0.00856	0.008	0.00735	0.0069	0.00603	0.00493	0.01028
726.538	0.00781	0.00881	0.0087	0.00905	0.00851	0.00793	0.00725	0.00676	0.00586	0.00473	0.01007
726.727	0.0079	0.00886	0.00873	0.00905	0.00847	0.00785	0.00714	0.00663	0.00569	0.00453	0.00985
726.916	0.008	0.00892	0.00876	0.00904	0.00843	0.00778	0.00704	0.00649	0.00552	0.00433	0.00964
727.105	0.0081	0.00898	0.00878	0.00904	0.00839	0.00771	0.00694	0.00636	0.00535	0.00413	0.00943
727.294	0.0082	0.00904	0.00881	0.00903	0.00835	0.00764	0.00683	0.00622	0.00518	0.00393	0.00922
727.482	0.00829	0.00911	0.00884	0.00903	0.00831	0.00757	0.00673	0.00609	0.00502	0.00373	0.00901
727.671	0.00839	0.00917	0.00887	0.00903	0.00827	0.0075	0.00663	0.00596	0.00485	0.00353	0.0088
727.86	0.00849	0.00923	0.0089	0.00903	0.00823	0.00743	0.00653	0.00583	0.00469	0.00333	0.00859
728.049	0.00859	0.00929	0.00894	0.00902	0.0082	0.00737	0.00644	0.0057	0.00452	0.00314	0.00839
728.237	0.00869	0.00936	0.00897	0.00903	0.00816	0.0073	0.00634	0.00557	0.00436	0.00295	0.00818
728.426	0.00879	0.00942	0.009	0.00903	0.00813	0.00724	0.00625	0.00544	0.0042	0.00275	0.00798
728.615	0.0089	0.00948	0.00904	0.00903	0.0081	0.00718	0.00615	0.00532	0.00404	0.00256	0.00778
728.803	0.009	0.00955	0.00907	0.00903	0.00807	0.00712	0.00606	0.00519	0.00388	0.00237	0.00758
728.992	0.0091	0.00961	0.0091	0.00903	0.00804	0.00706	0.00597	0.00507	0.00373	0.00218	0.00738
729.18	0.0092	0.00968	0.00914	0.00904	0.00801	0.007	0.00587	0.00494	0.00357	0.002	0.00718
729.369	0.0093	0.00975	0.00917	0.00904	0.00798	0.00694	0.00578	0.00482	0.00341	0.00181	0.00699
729.558	0.00941	0.00981	0.00921	0.00905	0.00795	0.00688	0.00569	0.0047	0.00326	0.00162	0.00679
729.746	0.00951	0.00988	0.00925	0.00905	0.00792	0.00682	0.0056	0.00457	0.0031	0.00144	0.0066
729.935	0.00961	0.00995	0.00928	0.00906	0.00789	0.00676	0.00551	0.00445	0.00295	0.00125	0.0064
730.123	0.00972	0.01001	0.00932	0.00906	0.00787	0.00671	0.00542	0.00433	0.0028	0.00107	0.00621
730.312	0.00982	0.01008	0.00936	0.00907	0.00784	0.00665	0.00533	0.00421	0.00264	0.000886779	0.00602
730.5	0.00992	0.01015	0.0094	0.00908	0.00781	0.00659	0.00525	0.00409	0.00249	0.000705662	0.00583
730.689	0.01003	0.01022	0.00944	0.00909	0.00779	0.00654	0.00516	0.00397	0.00234	0.000525652	0.00564
730.877	0.01013	0.01029	0.00947	0.0091	0.00777	0.00649	0.00507	0.00386	0.00219	0.000346766	0.00545
731.065	0.01024	0.01036	0.00952	0.00911	0.00774	0.00643	0.00499	0.00374	0.00205	0.000169077	0.00526
731.254	0.01035	0.01043	0.00956	0.00912	0.00772	0.00638	0.0049	0.00362	0.0019	-7.35728e-06	0.00508
731.442	0.01045	0.0105	0.0096	0.00913	0.0077	0.00633	0.00482	0.00351	0.00176	-0.000182453	0.00489
731.631	0.01056	0.01058	0.00964	0.00914	0.00768	0.00628	0.00474	0.0034	0.00161	-0.000356207	0.00471
731.819	0.01067	0.01065	0.00968	0.00915	0.00766	0.00623	0.00466	0.00328	0.00147	-0.000528691	0.00452
732.007	0.01078	0.01073	0.00973	0.00917	0.00764	0.00618	0.00457	0.00317	0.00133	-0.000699872	0.00434
732.196	0.01089	0.0108	0.00977	0.00918	0.00762	0.00614	0.00449	0.00306	0.00119	-0.000869722	0.00416
732.384	0.011	0.01088	0.00982	0.0092	0.00761	0.00609	0.00442	0.00295	0.00105	-0.00104	0.00398
732.572	0.01111	0.01096	0.00987	0.00921	0.00759	0.00604	0.00434	0.00284	0.000910371	-0.00121	0.00381
732.761	0.01122	0.01104	0.00991	0.00923	0.00758	0.006	0.00426	0.00274	0.000773728	-0.00137	0.00363
732.949	0.01133	0.01112	0.00996	0.00925	0.00756	0.00596	0.00418	0.00263	0.000638513	-0.00154	0.00346
733.137	0.01145	0.0112	0.01001	0.00927	0.00755	0.00591	0.00411	0.00253	0.000504763	-0.0017	0.00328
733.325	0.01156	0.01128	0.01006	0.00929	0.00754	0.00587	0.00403	0.00243	0.000372481	-0.00186	0.00311
733.514	0.01168	0.01136	0.01011	0.00931	0.00753	0.00583	0.00396	0.00232	0.000241658	-0.00202	0.00294
733.702	0.01179	0.01145	0.01017	0.00934	0.00752	0.00579	0.00389	0.00222	0.000112285	-0.00218	0.00277
733.89	0.01191	0.01153	0.01022	0.00936	0.00751	0.00576	0.00382	0.00212	-1.56795e-05	-0.00234	0.0026
734.078	0.01203	0.01162	0.01027	0.00938	0.0075	0.00572	0.00375	0.00203	-0.000142426	-0.00249	0.00244
734.266	0.01215	0.01171	0.01033	0.00941	0.0075	0.00568	0.00368	0.00193	-0.00026813	-0.00265	0.00227
734.454	0.01227	0.0118	0.01038	0.00944	0.00749	0.00565	0.00362	0.00183	-0.000392776	-0.0028	0.00211
734.643	0.01239	0.01189	0.01044	0.00946	0.00749	0.00562	0.00355	0.00174	-0.000516261	-0.00295	0.00194
734.831	0.01251	0.01198	0.0105	0.00949	0.00748	0.00558	0.00348	0.00165	-0.000638455	-0.0031	0.00178
735.019	0.01263	0.01207	0.01055	0.00952	0.00748	0.00555	0.00342	0.00155	-0.000759457	-0.00325	0.00162
735.207	0.01275	0.01216	0.01061	0.00955	0.00748	0.00552	0.00335	0.00146	-0.000879435	-0.0034	0.00146
735.395	0.01288	0.01225	0.01067	0.00958	0.00747	0.00549	0.00329	0.00137	-0.000998408	-0.00355	0.0013
735.583	0.013	0.01234	0.01073	0.00961	0.00747	0.00546	0.00323	0.00128	-0.00112	-0.0037	0.00114
735.771	0.01313	0.01244	0.01079	0.00964	0.00747	0.00543	0.00317	0.00119	-0.00123	-0.00384	0.000979181
735.959	0.01325	0.01253	0.01085	0.00968	0.00747	0.0054	0.00311	0.0011	-0.00135	-0.00399	0.00082158
736.147	0.01338	0.01262	0.01091	0.00971	0.00747	0.00537	0.00305	0.00101	-0.00146	-0.00413	0.000664772
736.335	0.0135	0.01272	0.01097	0.00974	0.00747	0.00534	0.00299	0.000925908	-0.00158	-0.00427	0.00050887
736.523	0.01363	0.01282	0.01104	0.00978	0.00747	0.00531	0.00293	0.000839546	-0.00169	-0.00442	0.000353915
736.711	0.01376	0.01291	0.0111	0.00981	0.00747	0.00529	0.00287	0.000753975	-0.0018	-0.00456	0.000199782
736.899	0.01389	0.01301	0.01116	0.00985	0.00748	0.00526	0.00281	0.000668966	-0.00191	-0.00469	4.62276e-05
737.086	0.01402	0.01311	0.01123	0.00988	0.00748	0.00524	0.00276	0.000584311	-0.00202	-0.00483	-0.00010695
737.274	0.01415	0.01321	0.01129	0.00992	0.00748	0.00521	0.0027	0.000499937	-0.00213	-0.00497	-0.000259804
737.462	0.01428	0.0133	0.01136	0.00996	0.00748	0.00518	0.00264	0.000415848	-0.00224	-0.00511	-0.000412325
737.65	0.01441	0.0134	0.01142	0.00999	0.00749	0.00516	0.00259	0.000332072	-0.00235	-0.00524	-0.000564476
737.838	0.01454	0.0135	0.01149	0.01003	0.00749	0.00513	0.00253	0.000248655	-0.00245	-0.00538	-0.000716202
738.026	0.01467	0.0136	0.01155	0.01006	0.00749	0.00511	0.00248	0.000165519	-0.00256	-0.00551	-0.000867586
738.213	0.0148	0.0137	0.01162	0.0101	0.0075	0.00508	0.00242	8.25289e-05	-0.00266	-0.00565	-0.00102
738.401	0.01493	0.0138	0.01169	0.01014	0.0075	0.00506	0.00237	-4.60568e-07	-0.00277	-0.00578	-0.00117
738.589	0.01506	0.01389	0.01175	0.01017	0.0075	0.00503	0.00231	-8.34506e-05	-0.00288	-0.00591	-0.00132
738.777	0.01519	0.01399	0.01182	0.01021	0.0075	0.00501	0.00226	-0.00016639	-0.00298	-0.00605	-0.00147
738.965	0.01532	0.01409	0.01189	0.01024	0.00751	0.00498	0.00221	-0.000249292	-0.00309	-0.00618	-0.00162
739.152	0.01545	0.01419	0.01195	0.01028	0.00751	0.00496	0.00215	-0.000332072	-0.00319	-0.00631	-0.00177
739.34	0.01558	0.01428	0.01202	0.01032	0.00751	0.00493	0.0021	-0.000414577	-0.0033	-0.00644	-0.00192
739.528	0.01571	0.01438	0.01208	0.01035	0.00751	0.00491	0.00204	-0.00049681	-0.0034	-0.00657	-0.00207
739.715	0.01584	0.01448	0.01215	0.01039	0.00751	0.00488	0.00199	-0.000578882	-0.0035	-0.0067	-0.00222
739.903	0.01597	0.01457	0.01222	0.01042	0.00752	0.00485	0.00194	-0.00066079	-0.00361	-0.00683	-0.00237
740.091	0.01609	0.01467	0.01228	0.01046	0.00752	0.00483	0.00189	-0.000742534	-0.00371	-0.00696	-0.00252
740.278	0.01622	0.01477	0.01235	0.01049	0.00752	0.0048	0.00183	-0.000824058	-0.00381	-0.00709	-0.00267
740.466	0.01635	0.01486	0.01242	0.01053	0.00752	0.00478	0.00178	-0.000905273	-0.00392	-0.00722	-0.00282
740.653	0.01648	0.01496	0.01248	0.01056	0.00752	0.00476	0.00173	-0.000986025	-0.00402	-0.00735	-0.00297
740.841	0.0166	0.01505	0.01255	0.0106	0.00752	0.00473	0.00168	-0.00107	-0.00412	-0.00748	-0.00312
741.028	0.01673	0.01515	0.01262	0.01063	0.00753	0.00471	0.00163	-0.00115	-0.00422	-0.00761	-0.00326
741.216	0.01686	0.01525	0.01268	0.01067	0.00753	0.00468	0.00158	-0.00122	-0.00432	-0.00773	-0.00341
741.403	0.01699	0.01534	0.01275	0.01071	0.00753	0.00466	0.00153	-0.0013	-0.00442	-0.00786	-0.00356
741.591	0.01711	0.01544	0.01282	0.01074	0.00753	0.00464	0.00148	-0.00138	-0.00452	-0.00799	-0.0037
741.778	0.01724	0.01554	0.01289	0.01078	0.00754	0.00462	0.00144	-0.00146	-0.00462	-0.00811	-0.00385
741.966	0.01737	0.01563	0.01296	0.01082	0.00754	0.0046	0.00139	-0.00153	-0.00472	-0.00824	-0.00399
742.153	0.0175	0.01573	0.01303	0.01085	0.00754	0.00458	0.00134	-0.00161	-0.00482	-0.00836	-0.00413
742.341	0.01763	0.01583	0.0131	0.01089	0.00755	0.00456	0.0013	-0.00168	-0.00492	-0.00848	-0.00428
742.528	0.01775	0.01592	0.01317	0.01093	0.00755	0.00454	0.00125	-0.00176	-0.00501	-0.00861	-0.00442
742.716	0.01788	0.01602	0.01324	0.01097	0.00756	0.00452	0.00121	-0.00183	-0.00511	-0.00873	-0.00456
742.903	0.01801	0.01612	0.01331	0.01101	0.00756	0.0045	0.00116	-0.0019	-0.0052	-0.00885	-0.0047
743.09	0.01814	0.01622	0.01338	0.01105	0.00757	0.00449	0.00112	-0.00197	-0.0053	-0.00897	-0.00484
743.278	0.01827	0.01632	0.01345	0.01109	0.00758	0.00447	0.00108	-0.00204	-0.00539	-0.00909	-0.00498
743.465	0.0184	0.01642	0.01352	0.01114	0.00759	0.00446	0.00104	-0.00211	-0.00548	-0.00921	-0.00511
743.652	0.01853	0.01652	0.0136	0.01118	0.0076	0.00445	0.001	-0.00218	-0.00558	-0.00932	-0.00525
743.84	0.01866	0.01662	0.01367	0.01122	0.00761	0.00443	0.000964885	-0.00224	-0.00567	-0.00944	-0.00538
744.027	0.01879	0.01672	0.01375	0.01127	0.00762	0.00442	0.000927858	-0.00231	-0.00576	-0.00956	-0.00552
744.214	0.01892	0.01682	0.01382	0.01131	0.00763	0.00441	0.000891675	-0.00237	-0.00585	-0.00967	-0.00565
744.401	0.01905	0.01692	0.0139	0.01136	0.00764	0.0044	0.000856304	-0.00244	-0.00594	-0.00979	-0.00578
744.589	0.01918	0.01703	0.01397	0.0114	0.00766	0.00439	0.000821632	-0.0025	-0.00603	-0.0099	-0.00591
744.776	0.01931	0.01713	0.01405	0.01145	0.00767	0.00439	0.000787569	-0.00256	-0.00611	-0.01002	-0.00604
744.963	0.01943	0.01723	0.01412	0.0115	0.00768	0.00438	0.000753948	-0.00262	-0.0062	-0.01013	-0.00617
745.15	0.01956	0.01733	0.0142	0.01154	0.0077	0.00437	0.000720757	-0.00268	-0.00629	-0.01024	-0.0063
745.337	0.01969	0.01744	0.01427	0.01159	0.00771	0.00436	0.000688086	-0.00274	-0.00638	-0.01036	-0.00643
745.524	0.01982	0.01754	0.01435	0.01164	0.00773	0.00436	0.000655956	-0.0028	-0.00646	-0.01047	-0.00655
745.711	0.01995	0.01764	0.01442	0.01168	0.00774	0.00435	0.000624243	-0.00286	-0.00655	-0.01058	-0.00668
745.899	0.02008	0.01774	0.0145	0.01173	0.00776	0.00435	0.000592679	-0.00292	-0.00664	-0.01069	-0.00681
746.086	0.02021	0.01785	0.01458	0.01178	0.00778	0.00434	0.000561131	-0.00298	-0.00672	-0.0108	-0.00693
746.273	0.02034	0.01795	0.01465	0.01182	0.00779	0.00433	0.000529562	-0.00303	-0.00681	-0.01092	-0.00706
746.46	0.02046	0.01805	0.01473	0.01187	0.00781	0.00433	0.000497957	-0.00309	-0.0069	-0.01103	-0.00718
746.647	0.02059	0.01815	0.0148	0.01192	0.00782	0.00432	0.000466233	-0.00315	-0.00698	-0.01114	-0.00731
746.834	0.02072	0.01825	0.01487	0.01196	0.00784	0.00431	0.000434267	-0.00321	-0.00707	-0.01125	-0.00743
747.021	0.02084	0.01835	0.01495	0.01201	0.00785	0.00431	0.00040206	-0.00327	-0.00716	-0.01137	-0.00756
747.208	0.02096	0.01845	0.01502	0.01205	0.00787	0.0043	0.000369763	-0.00333	-0.00724	-0.01148	-0.00768
747.395	0.02109	0.01855	0.01509	0.0121	0.00788	0.00429	0.000337516	-0.00338	-0.00733	-0.01159	-0.00781
747.582	0.02121	0.01865	0.01517	0.01215	0.0079	0.00429	0.000305261	-0.00344	-0.00742	-0.01171	-0.00793
747.769	0.02133	0.01875	0.01524	0.01219	0.00791	0.00428	0.000272989	-0.0035	-0.0075	-0.01182	-0.00805
747.956	0.02146	0.01885	0.01531	0.01224	0.00793	0.00427	0.000240819	-0.00356	-0.00759	-0.01193	-0.00818
748.143	0.02158	0.01895	0.01538	0.01228	0.00794	0.00427	0.000208889	-0.00361	-0.00768	-0.01204	-0.0083
748.329	0.0217	0.01904	0.01545	0.01233	0.00796	0.00426	0.000177159	-0.00367	-0.00776	-0.01215	-0.00842
748.516	0.02183	0.01914	0.01553	0.01237	0.00798	0.00425	0.000145482	-0.00372	-0.00785	-0.01227	-0.00854
748.703	0.02195	0.01924	0.0156	0.01242	0.00799	0.00425	0.000113779	-0.00378	-0.00793	-0.01238	-0.00866
748.89	0.02207	0.01934	0.01567	0.01246	0.00801	0.00424	8.21362e-05	-0.00384	-0.00802	-0.01249	-0.00878
749.077	0.02219	0.01944	0.01574	0.01251	0.00803	0.00423	5.05224e-05	-0.00389	-0.0081	-0.0126	-0.0089
749.264	0.02232	0.01954	0.01581	0.01256	0.00804	0.00423	1.88183e-05	-0.00395	-0.00819	-0.01271	-0.00902
749.45	0.02244	0.01963	0.01588	0.0126	0.00806	0.00422	-1.28128e-05	-0.004	-0.00827	-0.01282	-0.00914
749.637	0.02256	0.01973	0.01595	0.01265	0.00808	0.00421	-4.42652e-05	-0.00406	-0.00836	-0.01293	-0.00926
749.824	0.02268	0.01983	0.01602	0.01269	0.00809	0.00421	-7.5538e-05	-0.00411	-0.00844	-0.01304	-0.00938
750.011	0.02281	0.01992	0.01609	0.01274	0.00811	0.0042	-0.000106543	-0.00416	-0.00853	-0.01315	-0.0095
750.197	0.02293	0.02002	0.01616	0.01279	0.00813	0.00419	-0.000137205	-0.00422	-0.00861	-0.01326	-0.00962
750.384	0.02305	0.02012	0.01623	0.01283	0.00815	0.00419	-0.000167522	-0.00427	-0.00869	-0.01337	-0.00973
750.571	0.02318	0.02022	0.0163	0.01288	0.00816	0.00418	-0.000197534	-0.00432	-0.00878	-0.01348	-0.00985
750.757	0.0233	0.02031	0.01637	0.01293	0.00818	0.00418	-0.000227309	-0.00438	-0.00886	-0.01359	-0.00997
750.944	0.02342	0.02041	0.01644	0.01298	0.0082	0.00417	-0.000256822	-0.00443	-0.00894	-0.0137	-0.01008
751.131	0.02354	0.0205	0.01651	0.01302	0.00822	0.00416	-0.000285952	-0.00448	-0.00902	-0.0138	-0.0102
751.317	0.02367	0.0206	0.01658	0.01307	0.00824	0.00416	-0.000314413	-0.00453	-0.0091	-0.01391	-0.01031
751.504	0.02379	0.0207	0.01665	0.01312	0.00826	0.00416	-0.000341944	-0.00458	-0.00918	-0.01401	-0.01042
751.691	0.02392	0.0208	0.01672	0.01317	0.00828	0.00415	-0.000368552	-0.00463	-0.00926	-0.01412	-0.01054
751.877	0.02404	0.0209	0.0168	0.01322	0.00831	0.00415	-0.000394331	-0.00467	-0.00934	-0.01422	-0.01065
752.064	0.02417	0.02099	0.01687	0.01327	0.00833	0.00415	-0.000419338	-0.00472	-0.00941	-0.01433	-0.01076
752.25	0.0243	0.02109	0.01694	0.01332	0.00835	0.00414	-0.000443652	-0.00477	-0.00949	-0.01443	-0.01087
752.437	0.02443	0.02119	0.01702	0.01338	0.00838	0.00414	-0.000467282	-0.00481	-0.00956	-0.01453	-0.01098
752.623	0.02455	0.02129	0.01709	0.01343	0.0084	0.00414	-0.000490226	-0.00486	-0.00964	-0.01463	-0.01108
752.81	0.02468	0.02139	0.01717	0.01349	0.00843	0.00414	-0.000512402	-0.0049	-0.00971	-0.01473	-0.01119
752.996	0.02481	0.02149	0.01724	0.01354	0.00845	0.00414	-0.000533644	-0.00495	-0.00978	-0.01482	-0.0113
753.183	0.02494	0.0216	0.01732	0.0136	0.00848	0.00414	-0.000553896	-0.00499	-0.00985	-0.01492	-0.0114
753.369	0.02508	0.0217	0.0174	0.01365	0.00851	0.00415	-0.000573255	-0.00503	-0.00992	-0.01502	-0.01151
753.555	0.02521	0.0218	0.01748	0.01371	0.00854	0.00415	-0.000591851	-0.00507	-0.00999	-0.01511	-0.01161
753.742	0.02534	0.02191	0.01756	0.01377	0.00857	0.00415	-0.000609553	-0.00511	-0.01006	-0.0152	-0.01171
753.928	0.02548	0.02201	0.01764	0.01383	0.0086	0.00416	-0.000626264	-0.00515	-0.01012	-0.01529	-0.01181
754.115	0.02561	0.02212	0.01772	0.01389	0.00863	0.00416	-0.000642041	-0.00519	-0.01019	-0.01539	-0.01191
754.301	0.02575	0.02222	0.0178	0.01395	0.00866	0.00417	-0.000656861	-0.00522	-0.01025	-0.01547	-0.01201
754.487	0.02588	0.02233	0.01789	0.01401	0.0087	0.00417	-0.000670666	-0.00526	-0.01032	-0.01556	-0.01211
754.674	0.02602	0.02244	0.01797	0.01407	0.00873	0.00418	-0.000683422	-0.00529	-0.01038	-0.01565	-0.01221
754.86	0.02616	0.02254	0.01805	0.01413	0.00877	0.00419	-0.00069515	-0.00533	-0.01044	-0.01574	-0.0123
755.046	0.0263	0.02265	0.01814	0.0142	0.0088	0.0042	-0.000705883	-0.00536	-0.0105	-0.01582	-0.0124
755.232	0.02644	0.02276	0.01823	0.01426	0.00884	0.00421	-0.000715648	-0.00539	-0.01056	-0.0159	-0.01249
755.419	0.02658	0.02288	0.01831	0.01433	0.00888	0.00422	-0.000724426	-0.00542	-0.01061	-0.01599	-0.01258
755.605	0.02672	0.02299	0.0184	0.0144	0.00892	0.00424	-0.00073215	-0.00546	-0.01067	-0.01607	-0.01267
755.791	0.02687	0.0231	0.01849	0.01446	0.00896	0.00425	-0.000738694	-0.00548	-0.01072	-0.01615	-0.01276
755.977	0.02701	0.02321	0.01858	0.01453	0.009	0.00427	-0.00074398	-0.00551	-0.01078	-0.01623	-0.01285
756.164	0.02715	0.02333	0.01867	0.0146	0.00904	0.00428	-0.000748155	-0.00554	-0.01083	-0.0163	-0.01294
756.35	0.0273	0.02344	0.01877	0.01467	0.00909	0.0043	-0.000751378	-0.00557	-0.01088	-0.01638	-0.01303
756.536	0.02744	0.02356	0.01886	0.01474	0.00913	0.00432	-0.000753805	-0.00559	-0.01093	-0.01645	-0.01311
756.722	0.02759	0.02368	0.01895	0.01482	0.00918	0.00434	-0.000755472	-0.00562	-0.01098	-0.01653	-0.0132
756.908	0.02774	0.0238	0.01905	0.01489	0.00922	0.00436	-0.00075626	-0.00564	-0.01103	-0.0166	-0.01328
757.094	0.02788	0.02392	0.01914	0.01496	0.00927	0.00438	-0.00075607	-0.00566	-0.01108	-0.01668	-0.01337
757.28	0.02803	0.02404	0.01924	0.01504	0.00932	0.0044	-0.000754895	-0.00568	-0.01113	-0.01675	-0.01345
757.466	0.02818	0.02416	0.01934	0.01511	0.00936	0.00443	-0.000752843	-0.00571	-0.01117	-0.01682	-0.01353
757.652	0.02833	0.02428	0.01943	0.01519	0.00941	0.00445	-0.000749989	-0.00573	-0.01122	-0.01689	-0.01361
757.838	0.02848	0.0244	0.01953	0.01526	0.00946	0.00448	-0.000746381	-0.00575	-0.01126	-0.01695	-0.01369
758.024	0.02863	0.02453	0.01963	0.01534	0.00951	0.0045	-0.000742081	-0.00576	-0.01131	-0.01702	-0.01377
758.21	0.02878	0.02465	0.01973	0.01542	0.00957	0.00453	-0.000737074	-0.00578	-0.01135	-0.01709	-0.01385
758.396	0.02893	0.02477	0.01983	0.0155	0.00962	0.00456	-0.000731281	-0.0058	-0.01139	-0.01715	-0.01393
758.582	0.02908	0.0249	0.01993	0.01557	0.00967	0.00459	-0.000724749	-0.00582	-0.01144	-0.01722	-0.01401
758.768	0.02924	0.02503	0.02003	0.01565	0.00972	0.00462	-0.000717622	-0.00583	-0.01148	-0.01728	-0.01408
758.954	0.02939	0.02515	0.02014	0.01573	0.00978	0.00465	-0.00071003	-0.00585	-0.01152	-0.01734	-0.01416
759.14	0.02954	0.02528	0.02024	0.01581	0.00983	0.00468	-0.000702025	-0.00587	-0.01156	-0.01741	-0.01423
759.326	0.0297	0.02541	0.02034	0.01589	0.00989	0.00471	-0.000693716	-0.00588	-0.0116	-0.01747	-0.01431
759.512	0.02985	0.02554	0.02045	0.01597	0.00994	0.00474	-0.000685244	-0.0059	-0.01164	-0.01753	-0.01439
759.698	0.03001	0.02567	0.02055	0.01605	0.00999	0.00477	-0.000676536	-0.00591	-0.01168	-0.01759	-0.01446
759.884	0.03016	0.0258	0.02065	0.01613	0.01005	0.0048	-0.000667609	-0.00593	-0.01172	-0.01765	-0.01454
760.069	0.03032	0.02593	0.02076	0.0162	0.01011	0.00483	-0.00065869	-0.00595	-0.01175	-0.01771	-0.01461
760.255	0.03047	0.02606	0.02086	0.01628	0.01016	0.00486	-0.000649941	-0.00596	-0.01179	-0.01777	-0.01469
760.441	0.03062	0.02619	0.02096	0.01636	0.01021	0.00489	-0.000641287	-0.00598	-0.01183	-0.01783	-0.01476
760.627	0.03078	0.02631	0.02107	0.01644	0.01027	0.00493	-0.000632566	-0.00599	-0.01187	-0.01789	-0.01484
760.813	0.03093	0.02644	0.02117	0.01652	0.01032	0.00496	-0.000623628	-0.00601	-0.01191	-0.01795	-0.01491
760.998	0.03108	0.02657	0.02127	0.01659	0.01038	0.00499	-0.000614291	-0.00603	-0.01194	-0.018	-0.01499
761.184	0.03124	0.0267	0.02138	0.01667	0.01044	0.00502	-0.00060452	-0.00604	-0.01198	-0.01806	-0.01506
761.37	0.03139	0.02684	0.02148	0.01675	0.01049	0.00505	-0.000594469	-0.00606	-0.01201	-0.01812	-0.01513
761.555	0.03155	0.02697	0.02159	0.01683	0.01055	0.00508	-0.000584383	-0.00607	-0.01205	-0.01817	-0.01521
761.741	0.0317	0.0271	0.02169	0.01691	0.0106	0.00512	-0.000574333	-0.00609	-0.01208	-0.01823	-0.01528
761.927	0.03185	0.02723	0.0218	0.01699	0.01066	0.00515	-0.000564276	-0.0061	-0.01212	-0.01828	-0.01535
762.112	0.03201	0.02736	0.0219	0.01706	0.01072	0.00518	-0.00055413	-0.00612	-0.01215	-0.01834	-0.01543
762.298	0.03216	0.02749	0.02201	0.01714	0.01077	0.00521	-0.000543641	-0.00613	-0.01218	-0.01839	-0.0155
762.484	0.03232	0.02762	0.02211	0.01722	0.01083	0.00525	-0.00053258	-0.00615	-0.01222	-0.01845	-0.01557
762.669	0.03247	0.02775	0.02222	0.0173	0.01089	0.00528	-0.000520923	-0.00616	-0.01225	-0.0185	-0.01564
762.855	0.03263	0.02789	0.02232	0.01738	0.01094	0.00532	-0.00050883	-0.00617	-0.01228	-0.01856	-0.01571
763.04	0.03278	0.02802	0.02243	0.01746	0.011	0.00535	-0.000496402	-0.00619	-0.01231	-0.01861	-0.01578
763.226	0.03294	0.02815	0.02254	0.01754	0.01106	0.00539	-0.000483654	-0.0062	-0.01234	-0.01866	-0.01585
763.411	0.0331	0.02828	0.02264	0.01762	0.01112	0.00542	-0.000470565	-0.00621	-0.01237	-0.01871	-0.01592
763.597	0.03325	0.02842	0.02275	0.0177	0.01118	0.00546	-0.000457063	-0.00622	-0.0124	-0.01877	-0.01599
763.782	0.03341	0.02855	0.02286	0.01779	0.01124	0.00549	-0.000443202	-0.00624	-0.01243	-0.01882	-0.01606
763.968	0.03356	0.02868	0.02296	0.01787	0.0113	0.00553	-0.0004291	-0.00625	-0.01246	-0.01887	-0.01613
764.153	0.03372	0.02881	0.02307	0.01795	0.01136	0.00557	-0.000414853	-0.00626	-0.01249	-0.01892	-0.0162
764.339	0.03388	0.02895	0.02318	0.01803	0.01142	0.0056	-0.000400485	-0.00627	-0.01252	-0.01897	-0.01626
764.524	0.03403	0.02908	0.02328	0.01811	0.01148	0.00564	-0.00038594	-0.00628	-0.01254	-0.01902	-0.01633
764.71	0.03419	0.02921	0.02339	0.01819	0.01154	0.00568	-0.00037128	-0.00629	-0.01257	-0.01907	-0.0164
764.895	0.03434	0.02934	0.02349	0.01828	0.0116	0.00572	-0.000356539	-0.0063	-0.0126	-0.01913	-0.01647
765.08	0.0345	0.02947	0.0236	0.01836	0.01166	0.00575	-0.000341638	-0.00631	-0.01263	-0.01918	-0.01653
765.266	0.03466	0.02961	0.02371	0.01844	0.01172	0.00579	-0.000326515	-0.00632	-0.01265	-0.01923	-0.0166
765.451	0.03481	0.02974	0.02381	0.01852	0.01178	0.00583	-0.000311132	-0.00632	-0.01268	-0.01928	-0.01666
765.636	0.03497	0.02987	0.02392	0.01861	0.01184	0.00587	-0.00029545	-0.00633	-0.01271	-0.01933	-0.01673
765.822	0.03513	0.03	0.02402	0.01869	0.01191	0.00591	-0.000279554	-0.00634	-0.01273	-0.01938	-0.0168
766.007	0.03528	0.03013	0.02413	0.01877	0.01197	0.00595	-0.000263586	-0.00635	-0.01276	-0.01943	-0.01686
766.192	0.03544	0.03026	0.02423	0.01886	0.01203	0.00599	-0.000247575	-0.00636	-0.01279	-0.01948	-0.01693
766.378	0.0356	0.03039	0.02434	0.01894	0.01209	0.00603	-0.000231523	-0.00636	-0.01281	-0.01953	-0.01699
766.563	0.03575	0.03052	0.02444	0.01902	0.01215	0.00606	-0.000215409	-0.00637	-0.01284	-0.01958	-0.01706
766.748	0.03591	0.03065	0.02455	0.0191	0.01221	0.0061	-0.000199236	-0.00638	-0.01286	-0.01963	-0.01712
766.933	0.03606	0.03078	0.02465	0.01919	0.01227	0.00614	-0.000183042	-0.00638	-0.01289	-0.01968	-0.01719
767.118	0.03622	0.0309	0.02475	0.01927	0.01233	0.00618	-0.000166913	-0.00639	-0.01292	-0.01973	-0.01725
767.304	0.03637	0.03103	0.02485	0.01935	0.01239	0.00622	-0.000150989	-0.0064	-0.01294	-0.01978	-0.01732
767.489	0.03653	0.03116	0.02496	0.01943	0.01245	0.00626	-0.000135385	-0.0064	-0.01297	-0.01983	-0.01739
767.674	0.03668	0.03128	0.02506	0.01951	0.0125	0.0063	-0.000120112	-0.00641	-0.013	-0.01988	-0.01745
767.859	0.03683	0.0314	0.02516	0.01959	0.01256	0.00633	-0.000105153	-0.00642	-0.01303	-0.01994	-0.01752
768.044	0.03699	0.03153	0.02526	0.01967	0.01262	0.00637	-9.05782e-05	-0.00643	-0.01306	-0.01999	-0.01759
768.229	0.03714	0.03165	0.02535	0.01975	0.01267	0.0064	-7.64719e-05	-0.00643	-0.01309	-0.02004	-0.01766
768.414	0.03729	0.03177	0.02545	0.01983	0.01273	0.00644	-6.28537e-05	-0.00644	-0.01312	-0.0201	-0.01772
768.599	0.03744	0.03189	0.02555	0.01991	0.01278	0.00647	-4.98225e-05	-0.00645	-0.01315	-0.02015	-0.01779
768.784	0.03758	0.03201	0.02564	0.01999	0.01283	0.00651	-3.75848e-05	-0.00646	-0.01318	-0.0202	-0.01786
768.969	0.03773	0.03212	0.02574	0.02006	0.01289	0.00654	-2.61995e-05	-0.00647	-0.01321	-0.02026	-0.01793
769.154	0.03787	0.03224	0.02583	0.02014	0.01294	0.00657	-1.56448e-05	-0.00648	-0.01325	-0.02032	-0.018
769.339	0.03802	0.03235	0.02592	0.02021	0.01298	0.0066	-5.8991e-06	-0.00649	-0.01328	-0.02037	-0.01808
769.524	0.03816	0.03247	0.02602	0.02029	0.01303	0.00663	3.06845e-06	-0.0065	-0.01332	-0.02043	-0.01815
769.709	0.0383	0.03258	0.02611	0.02036	0.01308	0.00666	1.12403e-05	-0.00652	-0.01335	-0.02049	-0.01822
769.894	0.03844	0.03269	0.02619	0.02043	0.01312	0.00669	1.83941e-05	-0.00653	-0.01339	-0.02055	-0.0183
770.079	0.03858	0.03279	0.02628	0.0205	0.01317	0.00672	2.42264e-05	-0.00655	-0.01343	-0.02061	-0.01837
770.264	0.03872	0.0329	0.02637	0.02056	0.01321	0.00674	2.87151e-05	-0.00656	-0.01347	-0.02067	-0.01845
770.449	0.03885	0.03301	0.02645	0.02063	0.01325	0.00677	3.20473e-05	-0.00658	-0.01351	-0.02073	-0.01853
770.634	0.03899	0.03311	0.02654	0.02069	0.01328	0.00679	3.43672e-05	-0.0066	-0.01355	-0.0208	-0.01861
770.819	0.03912	0.03321	0.02662	0.02076	0.01332	0.00681	3.57767e-05	-0.00662	-0.01359	-0.02086	-0.01869
771.003	0.03925	0.03331	0.0267	0.02082	0.01336	0.00683	3.63216e-05	-0.00664	-0.01364	-0.02092	-0.01877
771.188	0.03938	0.03341	0.02678	0.02088	0.01339	0.00685	3.5973e-05	-0.00666	-0.01368	-0.02099	-0.01885
771.373	0.03951	0.03351	0.02686	0.02094	0.01343	0.00687	3.46687e-05	-0.00668	-0.01373	-0.02105	-0.01893
771.558	0.03963	0.03361	0.02694	0.021	0.01346	0.00689	3.24062e-05	-0.0067	-0.01377	-0.02112	-0.01901
771.743	0.03976	0.0337	0.02702	0.02106	0.01349	0.0069	2.91861e-05	-0.00673	-0.01382	-0.02118	-0.0191
771.927	0.03988	0.0338	0.02709	0.02111	0.01352	0.00692	2.49881e-05	-0.00675	-0.01387	-0.02125	-0.01918
772.112	0.04001	0.03389	0.02717	0.02117	0.01355	0.00693	1.98747e-05	-0.00678	-0.01391	-0.02131	-0.01926
772.297	0.04013	0.03399	0.02724	0.02122	0.01358	0.00694	1.38347e-05	-0.0068	-0.01396	-0.02138	-0.01935
772.482	0.04025	0.03408	0.02732	0.02128	0.0136	0.00696	6.97862e-06	-0.00683	-0.01401	-0.02144	-0.01944
772.666	0.04036	0.03417	0.02739	0.02133	0.01363	0.00697	-6.38323e-07	-0.00686	-0.01406	-0.02151	-0.01952
772.851	0.04048	0.03426	0.02746	0.02138	0.01365	0.00698	-9.15373e-06	-0.00688	-0.01411	-0.02158	-0.01961
773.036	0.0406	0.03434	0.02753	0.02143	0.01368	0.00699	-1.86343e-05	-0.00691	-0.01416	-0.02164	-0.0197
773.22	0.04071	0.03443	0.0276	0.02148	0.0137	0.007	-2.90312e-05	-0.00694	-0.01421	-0.02171	-0.01978
773.405	0.04082	0.03452	0.02767	0.02153	0.01372	0.007	-4.0245e-05	-0.00697	-0.01426	-0.02178	-0.01987
773.589	0.04093	0.0346	0.02774	0.02157	0.01374	0.00701	-5.21956e-05	-0.007	-0.01432	-0.02184	-0.01996
773.774	0.04104	0.03469	0.02781	0.02162	0.01376	0.00701	-6.48085e-05	-0.00704	-0.01437	-0.02191	-0.02005
773.959	0.04115	0.03477	0.02788	0.02166	0.01378	0.00702	-7.80591e-05	-0.00707	-0.01442	-0.02198	-0.02014
774.143	0.04126	0.03485	0.02794	0.0217	0.01379	0.00702	-9.20108e-05	-0.0071	-0.01447	-0.02204	-0.02023
774.328	0.04136	0.03493	0.02801	0.02175	0.01381	0.00702	-0.000106778	-0.00714	-0.01452	-0.02211	-0.02032
774.512	0.04146	0.03501	0.02808	0.02179	0.01383	0.00702	-0.000122381	-0.00717	-0.01458	-0.02217	-0.02041
774.697	0.04157	0.03509	0.02814	0.02183	0.01384	0.00702	-0.000138695	-0.0072	-0.01463	-0.02224	-0.0205
774.881	0.04167	0.03517	0.0282	0.02187	0.01385	0.00702	-0.000155545	-0.00724	-0.01468	-0.02231	-0.02059
775.066	0.04177	0.03525	0.02827	0.0219	0.01387	0.00702	-0.000172665	-0.00728	-0.01473	-0.02237	-0.02068
775.25	0.04187	0.03533	0.02833	0.02194	0.01388	0.00702	-0.00018985	-0.00731	-0.01478	-0.02243	-0.02077
775.434	0.04196	0.03541	0.02839	0.02198	0.01389	0.00702	-0.000207036	-0.00735	-0.01483	-0.0225	-0.02086
775.619	0.04206	0.03548	0.02846	0.02202	0.01391	0.00701	-0.000224282	-0.00738	-0.01488	-0.02256	-0.02095
775.803	0.04216	0.03556	0.02852	0.02205	0.01392	0.00701	-0.000241671	-0.00742	-0.01493	-0.02262	-0.02104
775.988	0.04225	0.03564	0.02858	0.02209	0.01393	0.00701	-0.000259099	-0.00745	-0.01498	-0.02268	-0.02113
776.172	0.04235	0.03571	0.02864	0.02212	0.01394	0.007	-0.000276513	-0.00749	-0.01502	-0.02274	-0.02121
776.356	0.04244	0.03579	0.0287	0.02216	0.01396	0.007	-0.000293925	-0.00752	-0.01507	-0.0228	-0.0213
776.541	0.04253	0.03587	0.02876	0.02219	0.01397	0.007	-0.000311207	-0.00756	-0.01512	-0.02286	-0.02139
776.725	0.04262	0.03594	0.02882	0.02223	0.01398	0.00699	-0.000328272	-0.00759	-0.01516	-0.02292	-0.02147
776.909	0.04272	0.03602	0.02888	0.02226	0.01399	0.00699	-0.000344964	-0.00762	-0.0152	-0.02297	-0.02155
777.094	0.04281	0.03609	0.02894	0.0223	0.01401	0.00699	-0.000361056	-0.00766	-0.01524	-0.02303	-0.02164
777.278	0.0429	0.03617	0.029	0.02234	0.01402	0.00698	-0.000376526	-0.00769	-0.01528	-0.02308	-0.02172
777.462	0.04299	0.03625	0.02907	0.02237	0.01403	0.00698	-0.000391366	-0.00772	-0.01532	-0.02313	-0.0218
777.646	0.04308	0.03632	0.02913	0.02241	0.01405	0.00698	-0.000405578	-0.00775	-0.01536	-0.02318	-0.02187
777.831	0.04317	0.0364	0.02919	0.02244	0.01406	0.00698	-0.000419154	-0.00778	-0.0154	-0.02323	-0.02195
778.015	0.04326	0.03647	0.02925	0.02248	0.01408	0.00698	-0.000432059	-0.0078	-0.01543	-0.02328	-0.02203
778.199	0.04334	0.03655	0.02931	0.02252	0.0141	0.00698	-0.000444393	-0.00783	-0.01547	-0.02333	-0.0221
778.383	0.04343	0.03663	0.02937	0.02256	0.01411	0.00698	-0.000456175	-0.00786	-0.0155	-0.02338	-0.02217
778.567	0.04352	0.0367	0.02943	0.02259	0.01413	0.00698	-0.000467295	-0.00788	-0.01553	-0.02342	-0.02224
778.751	0.04361	0.03678	0.0295	0.02263	0.01415	0.00698	-0.00047784	-0.0079	-0.01556	-0.02347	-0.02231
778.935	0.04369	0.03686	0.02956	0.02267	0.01417	0.00699	-0.000487962	-0.00793	-0.01559	-0.02352	-0.02238
779.12	0.04378	0.03693	0.02962	0.02271	0.01419	0.00699	-0.000497706	-0.00795	-0.01562	-0.02356	-0.02245
779.304	0.04387	0.03701	0.02968	0.02275	0.01421	0.00699	-0.000507183	-0.00797	-0.01565	-0.0236	-0.02252
779.488	0.04395	0.03708	0.02974	0.02279	0.01423	0.007	-0.000516552	-0.008	-0.01568	-0.02365	-0.02258
779.672	0.04404	0.03716	0.0298	0.02283	0.01424	0.007	-0.000525844	-0.00802	-0.01571	-0.02369	-0.02265
779.856	0.04412	0.03723	0.02986	0.02286	0.01426	0.007	-0.000535047	-0.00804	-0.01574	-0.02373	-0.02271
780.04	0.0442	0.03731	0.02992	0.0229	0.01428	0.00701	-0.000544057	-0.00806	-0.01576	-0.02378	-0.02278
780.224	0.04429	0.03738	0.02998	0.02294	0.0143	0.00701	-0.000552823	-0.00808	-0.01579	-0.02382	-0.02284
780.408	0.04437	0.03745	0.03004	0.02298	0.01432	0.00701	-0.000561354	-0.0081	-0.01582	-0.02386	-0.0229
780.592	0.04445	0.03753	0.03009	0.02302	0.01434	0.00702	-0.000569701	-0.00812	-0.01584	-0.0239	-0.02297
780.776	0.04454	0.0376	0.03015	0.02305	0.01437	0.00702	-0.000578002	-0.00814	-0.01587	-0.02395	-0.02303
780.96	0.04462	0.03767	0.03021	0.02309	0.01439	0.00703	-0.000586366	-0.00816	-0.0159	-0.02399	-0.02309
781.143	0.0447	0.03775	0.03027	0.02313	0.01441	0.00703	-0.000594847	-0.00818	-0.01592	-0.02403	-0.02315
781.327	0.04478	0.03782	0.03032	0.02317	0.01443	0.00704	-0.000603351	-0.0082	-0.01595	-0.02407	-0.02321
781.511	0.04486	0.03789	0.03038	0.0232	0.01445	0.00704	-0.000611803	-0.00822	-0.01598	-0.02412	-0.02327
781.695	0.04494	0.03796	0.03044	0.02324	0.01447	0.00705	-0.000620221	-0.00824	-0.01601	-0.02416	-0.02333
781.879	0.04502	0.03803	0.03049	0.02328	0.01449	0.00706	-0.000628602	-0.00826	-0.01603	-0.0242	-0.02339
782.063	0.04511	0.0381	0.03055	0.02331	0.01451	0.00706	-0.000636876	-0.00828	-0.01606	-0.02424	-0.02345
782.247	0.04519	0.03817	0.0306	0.02335	0.01453	0.00707	-0.000644992	-0.0083	-0.01609	-0.02429	-0.02351
782.43	0.04527	0.03824	0.03066	0.02339	0.01455	0.00707	-0.000652932	-0.00832	-0.01612	-0.02433	-0.02357
782.614	0.04535	0.03831	0.03071	0.02343	0.01457	0.00708	-0.000660605	-0.00834	-0.01614	-0.02437	-0.02363
782.798	0.04543	0.03838	0.03077	0.02346	0.01459	0.00709	-0.000667918	-0.00836	-0.01617	-0.02442	-0.02368
782.982	0.04551	0.03845	0.03082	0.0235	0.01462	0.0071	-0.00067484	-0.00838	-0.0162	-0.02446	-0.02374
783.165	0.0456	0.03853	0.03088	0.02354	0.01464	0.0071	-0.000681424	-0.0084	-0.01623	-0.0245	-0.0238
783.349	0.04568	0.0386	0.03093	0.02358	0.01466	0.00711	-0.00068781	-0.00841	-0.01626	-0.02455	-0.02385
783.533	0.04577	0.03867	0.03099	0.02362	0.01468	0.00712	-0.000694073	-0.00843	-0.01629	-0.02459	-0.02391
783.716	0.04585	0.03874	0.03104	0.02365	0.01471	0.00713	-0.000700172	-0.00845	-0.01632	-0.02463	-0.02397
783.9	0.04593	0.03881	0.0311	0.02369	0.01473	0.00714	-0.000705979	-0.00847	-0.01634	-0.02468	-0.02402
784.084	0.04602	0.03888	0.03115	0.02373	0.01475	0.00715	-0.000711403	-0.00849	-0.01637	-0.02472	-0.02408
784.267	0.0461	0.03895	0.03121	0.02377	0.01478	0.00716	-0.000716396	-0.0085	-0.0164	-0.02477	-0.02413
784.451	0.04619	0.03902	0.03126	0.02381	0.0148	0.00717	-0.000720886	-0.00852	-0.01643	-0.02481	-0.02419
784.635	0.04628	0.0391	0.03132	0.02385	0.01483	0.00719	-0.000724985	-0.00854	-0.01646	-0.02486	-0.02424
784.818	0.04637	0.03917	0.03137	0.0239	0.01485	0.0072	-0.000728879	-0.00855	-0.01649	-0.0249	-0.0243
785.002	0.04645	0.03924	0.03143	0.02394	0.01488	0.00721	-0.000732701	-0.00857	-0.01653	-0.02495	-0.02435
785.185	0.04654	0.03931	0.03148	0.02398	0.01491	0.00722	-0.000736546	-0.00858	-0.01656	-0.02499	-0.02441
785.369	0.04663	0.03939	0.03154	0.02402	0.01493	0.00724	-0.000740307	-0.0086	-0.01659	-0.02504	-0.02446
785.552	0.04672	0.03946	0.0316	0.02406	0.01496	0.00725	-0.000743774	-0.00862	-0.01662	-0.02508	-0.02452
785.736	0.04681	0.03953	0.03165	0.0241	0.01499	0.00726	-0.000746791	-0.00863	-0.01666	-0.02513	-0.02457
785.919	0.0469	0.03961	0.03171	0.02415	0.01501	0.00728	-0.000749233	-0.00865	-0.01669	-0.02518	-0.02463
786.103	0.04699	0.03968	0.03177	0.02419	0.01504	0.00729	-0.000751011	-0.00866	-0.01672	-0.02522	-0.02468
786.286	0.04709	0.03976	0.03182	0.02423	0.01507	0.00731	-0.000752186	-0.00868	-0.01675	-0.02527	-0.02474
786.47	0.04718	0.03983	0.03188	0.02428	0.0151	0.00733	-0.000752805	-0.00869	-0.01678	-0.02531	-0.02479
786.653	0.04728	0.03991	0.03194	0.02432	0.01513	0.00734	-0.000752822	-0.00871	-0.01682	-0.02536	-0.02485
786.836	0.04738	0.03999	0.032	0.02437	0.01516	0.00736	-0.00075221	-0.00872	-0.01685	-0.0254	-0.0249
787.02	0.04747	0.04007	0.03206	0.02442	0.0152	0.00738	-0.00075092	-0.00873	-0.01688	-0.02545	-0.02496
787.203	0.04757	0.04015	0.03212	0.02447	0.01523	0.0074	-0.000748805	-0.00874	-0.01691	-0.02549	-0.02501
787.386	0.04767	0.04023	0.03219	0.02452	0.01527	0.00742	-0.000745718	-0.00875	-0.01694	-0.02553	-0.02506
787.57	0.04778	0.04031	0.03225	0.02457	0.0153	0.00744	-0.000741598	-0.00877	-0.01697	-0.02558	-0.02511
787.753	0.04788	0.0404	0.03232	0.02462	0.01534	0.00747	-0.000736479	-0.00877	-0.01699	-0.02562	-0.02517
787.936	0.04799	0.04048	0.03239	0.02467	0.01538	0.00749	-0.000730391	-0.00878	-0.01702	-0.02566	-0.02522
788.12	0.0481	0.04057	0.03245	0.02472	0.01542	0.00752	-0.000723259	-0.00879	-0.01705	-0.0257	-0.02527
788.303	0.04821	0.04066	0.03252	0.02478	0.01546	0.00754	-0.000714947	-0.0088	-0.01707	-0.02573	-0.02532
788.486	0.04832	0.04075	0.0326	0.02483	0.0155	0.00757	-0.000705378	-0.0088	-0.0171	-0.02577	-0.02537
788.669	0.04843	0.04084	0.03267	0.02489	0.01554	0.0076	-0.000694486	-0.00881	-0.01712	-0.02581	-0.02541
788.853	0.04855	0.04093	0.03274	0.02495	0.01559	0.00763	-0.000682218	-0.00881	-0.01714	-0.02584	-0.02546
789.036	0.04866	0.04103	0.03282	0.02501	0.01563	0.00766	-0.000668611	-0.00881	-0.01716	-0.02587	-0.02551
789.219	0.04878	0.04113	0.0329	0.02508	0.01568	0.00769	-0.000653826	-0.00881	-0.01718	-0.0259	-0.02555
789.402	0.0489	0.04122	0.03298	0.02514	0.01573	0.00773	-0.000637978	-0.00881	-0.01719	-0.02594	-0.0256
789.585	0.04902	0.04132	0.03306	0.0252	0.01578	0.00776	-0.000620944	-0.00881	-0.01721	-0.02596	-0.02564
789.768	0.04915	0.04142	0.03314	0.02527	0.01583	0.0078	-0.00060258	-0.00881	-0.01723	-0.02599	-0.02568
789.951	0.04927	0.04153	0.03322	0.02534	0.01589	0.00784	-0.00058283	-0.00881	-0.01724	-0.02602	-0.02572
790.135	0.0494	0.04163	0.03331	0.02541	0.01594	0.00788	-0.000561721	-0.0088	-0.01725	-0.02605	-0.02576
790.318	0.04952	0.04173	0.03339	0.02548	0.016	0.00792	-0.000539312	-0.0088	-0.01726	-0.02607	-0.0258
790.501	0.04965	0.04184	0.03348	0.02555	0.01605	0.00796	-0.000515672	-0.00879	-0.01727	-0.02609	-0.02584
790.684	0.04978	0.04195	0.03357	0.02562	0.01611	0.008	-0.000490922	-0.00878	-0.01728	-0.02612	-0.02588
790.867	0.04991	0.04206	0.03366	0.02569	0.01617	0.00805	-0.000465173	-0.00877	-0.01729	-0.02614	-0.02592
791.05	0.05005	0.04216	0.03375	0.02577	0.01623	0.00809	-0.000438328	-0.00876	-0.0173	-0.02616	-0.02595
791.233	0.05018	0.04228	0.03384	0.02584	0.01629	0.00814	-0.000410224	-0.00875	-0.0173	-0.02618	-0.02599
791.416	0.05031	0.04239	0.03394	0.02592	0.01635	0.00818	-0.000380795	-0.00874	-0.01731	-0.02619	-0.02602
791.599	0.05045	0.0425	0.03403	0.026	0.01642	0.00823	-0.000350068	-0.00873	-0.01731	-0.02621	-0.02606
791.782	0.05058	0.04261	0.03413	0.02608	0.01648	0.00828	-0.000318128	-0.00871	-0.01731	-0.02623	-0.02609
791.964	0.05072	0.04273	0.03422	0.02616	0.01655	0.00833	-0.000285171	-0.0087	-0.01731	-0.02624	-0.02612
792.147	0.05086	0.04284	0.03432	0.02624	0.01661	0.00838	-0.00025146	-0.00868	-0.01731	-0.02625	-0.02615
792.33	0.051	0.04296	0.03442	0.02632	0.01668	0.00844	-0.000217084	-0.00867	-0.01731	-0.02627	-0.02619
792.513	0.05113	0.04307	0.03452	0.02641	0.01675	0.00849	-0.000181979	-0.00865	-0.01731	-0.02628	-0.02622
792.696	0.05127	0.04319	0.03462	0.02649	0.01681	0.00854	-0.000146011	-0.00863	-0.01731	-0.02629	-0.02625
792.879	0.05141	0.04331	0.03471	0.02657	0.01688	0.00859	-0.00010904	-0.00861	-0.01731	-0.0263	-0.02628
793.062	0.05155	0.04343	0.03482	0.02666	0.01695	0.00865	-7.0952e-05	-0.00859	-0.0173	-0.02631	-0.0263
793.244	0.05169	0.04354	0.03492	0.02675	0.01702	0.00871	-3.17724e-05	-0.00857	-0.0173	-0.02632	-0.02633
793.427	0.05183	0.04366	0.03502	0.02684	0.01709	0.00876	8.24169e-06	-0.00855	-0.01729	-0.02633	-0.02636
793.61	0.05197	0.04378	0.03512	0.02692	0.01716	0.00882	4.88478e-05	-0.00853	-0.01729	-0.02633	-0.02639
793.793	0.05211	0.0439	0.03522	0.02701	0.01724	0.00888	8.98849e-05	-0.0085	-0.01728	-0.02634	-0.02641
793.975	0.05225	0.04402	0.03533	0.0271	0.01731	0.00893	0.000131205	-0.00848	-0.01727	-0.02635	-0.02644
794.158	0.05239	0.04414	0.03543	0.02719	0.01738	0.00899	0.000172779	-0.00846	-0.01726	-0.02635	-0.02646
794.341	0.05253	0.04426	0.03553	0.02728	0.01745	0.00905	0.000214644	-0.00844	-0.01725	-0.02636	-0.02649
794.524	0.05267	0.04438	0.03564	0.02737	0.01752	0.00911	0.000256889	-0.00841	-0.01725	-0.02636	-0.02651
794.706	0.05281	0.04449	0.03574	0.02746	0.0176	0.00917	0.000299504	-0.00839	-0.01724	-0.02637	-0.02654
794.889	0.05295	0.04461	0.03585	0.02755	0.01767	0.00922	0.000342339	-0.00836	-0.01723	-0.02637	-0.02657
795.071	0.05309	0.04473	0.03595	0.02765	0.01774	0.00928	0.000385239	-0.00834	-0.01722	-0.02638	-0.02659
795.254	0.05323	0.04485	0.03605	0.02774	0.01781	0.00934	0.000427857	-0.00832	-0.01721	-0.02638	-0.02662
795.437	0.05336	0.04497	0.03615	0.02783	0.01788	0.0094	0.000470014	-0.00829	-0.0172	-0.02639	-0.02664
795.619	0.0535	0.04508	0.03626	0.02792	0.01795	0.00946	0.000511879	-0.00827	-0.01719	-0.0264	-0.02667
795.802	0.05363	0.0452	0.03636	0.02801	0.01802	0.00951	0.000553527	-0.00825	-0.01718	-0.0264	-0.02669
795.984	0.05377	0.04531	0.03646	0.02809	0.01809	0.00957	0.000594914	-0.00823	-0.01717	-0.02641	-0.02672
796.167	0.0539	0.04543	0.03656	0.02818	0.01816	0.00962	0.000635907	-0.0082	-0.01716	-0.02642	-0.02675
796.349	0.05403	0.04554	0.03666	0.02827	0.01823	0.00968	0.000676318	-0.00818	-0.01715	-0.02642	-0.02677
796.532	0.05416	0.04566	0.03676	0.02836	0.0183	0.00973	0.000716098	-0.00816	-0.01714	-0.02643	-0.0268
796.714	0.05429	0.04577	0.03685	0.02844	0.01836	0.00979	0.000755229	-0.00814	-0.01714	-0.02644	-0.02683
796.897	0.05442	0.04588	0.03695	0.02853	0.01843	0.00984	0.000793627	-0.00812	-0.01713	-0.02645	-0.02686
797.079	0.05455	0.04599	0.03704	0.02861	0.0185	0.00989	0.000831334	-0.00811	-0.01713	-0.02646	-0.02689
797.262	0.05467	0.04609	0.03714	0.0287	0.01856	0.00994	0.000868431	-0.00809	-0.01712	-0.02647	-0.02692
797.444	0.0548	0.0462	0.03723	0.02878	0.01862	0.00999	0.000904928	-0.00807	-0.01712	-0.02648	-0.02695
797.627	0.05492	0.04631	0.03732	0.02886	0.01869	0.01004	0.000940973	-0.00805	-0.01712	-0.02649	-0.02698
797.809	0.05504	0.04641	0.03741	0.02894	0.01875	0.01009	0.000976751	-0.00804	-0.01711	-0.02651	-0.02701
[truncated: 576 more rows]

## Sheet: Figure 5
	State of Charge
λ / nm	1 (V(V))	0.9	0.8	0.7	0.6	0.5	0.4	0.3	0.2	0.1	0 (V(IV))
400.082	0.65573	0.68217	0.6609	0.66389	0.64992	0.64915	0.61589	0.5298	0.3873	0.19616	0.0022
400.298	0.6581	0.68588	0.66529	0.66777	0.65324	0.65157	0.61683	0.52854	0.38541	0.19528	0.00234
400.513	0.66048	0.68959	0.66968	0.67163	0.65655	0.65394	0.61772	0.52725	0.38353	0.19442	0.00248
400.729	0.66287	0.69328	0.67405	0.67546	0.65984	0.65627	0.61856	0.52593	0.38167	0.19357	0.00262
400.945	0.66528	0.69696	0.6784	0.67928	0.66311	0.65855	0.61933	0.52458	0.37983	0.19274	0.00275
401.161	0.66771	0.70062	0.68274	0.68307	0.66636	0.66078	0.62005	0.52321	0.37801	0.19191	0.00286
401.377	0.67016	0.70425	0.68705	0.68682	0.66959	0.66296	0.62071	0.52182	0.37622	0.1911	0.00297
401.593	0.67262	0.70785	0.69132	0.69053	0.67278	0.66507	0.6213	0.52041	0.37445	0.1903	0.00307
401.809	0.67511	0.7114	0.69554	0.69418	0.67592	0.66712	0.62182	0.51899	0.37271	0.18952	0.00317
402.024	0.67761	0.71492	0.69971	0.69777	0.67902	0.66909	0.62227	0.51755	0.371	0.18876	0.00326
402.24	0.68012	0.71839	0.70382	0.70131	0.68207	0.671	0.62265	0.51611	0.36931	0.18801	0.00335
402.456	0.68266	0.72182	0.70787	0.70478	0.68508	0.67284	0.62298	0.51467	0.36765	0.18727	0.00343
402.672	0.68521	0.72518	0.71186	0.70818	0.68804	0.67459	0.62323	0.51322	0.36601	0.18654	0.0035
402.888	0.68777	0.72849	0.71578	0.71149	0.69092	0.67627	0.6234	0.51176	0.3644	0.18582	0.00355
403.103	0.69034	0.73172	0.71962	0.71472	0.69374	0.67786	0.62351	0.5103	0.3628	0.1851	0.0036
403.319	0.69291	0.73488	0.72338	0.71786	0.69647	0.67935	0.62353	0.50884	0.36123	0.18439	0.00364
403.535	0.69546	0.73795	0.72706	0.7209	0.69912	0.68074	0.62346	0.50735	0.35967	0.18368	0.00367
403.75	0.698	0.74093	0.73063	0.72384	0.70166	0.68201	0.62331	0.50586	0.35812	0.18298	0.00368
403.966	0.70051	0.74381	0.7341	0.72666	0.7041	0.68317	0.62306	0.50434	0.35659	0.18227	0.00368
404.182	0.70299	0.74659	0.73747	0.72937	0.70643	0.6842	0.62272	0.50281	0.35507	0.18157	0.00365
404.397	0.70544	0.74927	0.74074	0.73197	0.70865	0.68511	0.62228	0.50125	0.35355	0.18085	0.0036
404.613	0.70786	0.75185	0.7439	0.73445	0.71076	0.68591	0.62175	0.49967	0.35202	0.18013	0.00353
404.828	0.71024	0.75431	0.74696	0.73682	0.71275	0.68658	0.62111	0.49806	0.35051	0.1794	0.00343
405.044	0.71258	0.75666	0.74992	0.73906	0.71462	0.68713	0.62038	0.49644	0.34899	0.17866	0.00332
405.26	0.71488	0.75892	0.75278	0.74119	0.71637	0.68757	0.61956	0.49479	0.34748	0.17792	0.00318
405.475	0.71714	0.76107	0.75555	0.74323	0.71802	0.6879	0.61866	0.49312	0.34596	0.17716	0.00303
405.691	0.71936	0.76313	0.75825	0.74518	0.71958	0.68813	0.61768	0.49143	0.34445	0.1764	0.00286
405.906	0.72153	0.7651	0.76086	0.74705	0.72103	0.68826	0.61663	0.48971	0.34292	0.17562	0.00267
406.122	0.72365	0.76696	0.76337	0.74882	0.72238	0.68828	0.61549	0.48797	0.34139	0.17483	0.00246
406.337	0.72572	0.76871	0.7658	0.75048	0.7236	0.68819	0.61427	0.48621	0.33985	0.17402	0.00224
406.553	0.72772	0.77034	0.76811	0.75204	0.72471	0.68799	0.61296	0.48442	0.33831	0.17321	0.002
406.768	0.72967	0.77187	0.77033	0.7535	0.72569	0.68766	0.61156	0.4826	0.33677	0.17239	0.00174
406.983	0.73155	0.77327	0.77245	0.75485	0.72655	0.68721	0.61008	0.48075	0.33523	0.17155	0.00147
407.199	0.73336	0.77455	0.77444	0.75607	0.72726	0.68663	0.60849	0.47887	0.33368	0.17071	0.00118
407.414	0.73508	0.77569	0.7763	0.75716	0.72782	0.68592	0.60681	0.47696	0.33213	0.16986	0.000877764
407.63	0.73673	0.7767	0.77803	0.75812	0.72825	0.68508	0.60505	0.47502	0.33059	0.169	0.000563965
407.845	0.73831	0.77757	0.77963	0.75896	0.72852	0.68412	0.60321	0.47307	0.32905	0.16815	0.00024109
408.06	0.73981	0.77833	0.78111	0.75966	0.72866	0.68303	0.60128	0.47109	0.32752	0.16728	-9.17021e-05
408.276	0.74124	0.77895	0.78245	0.76024	0.72863	0.68182	0.59927	0.4691	0.32601	0.16642	-0.000432159
408.491	0.74259	0.77946	0.78366	0.76069	0.72847	0.68049	0.59719	0.4671	0.32451	0.16556	-0.000775634
408.706	0.74387	0.77984	0.78473	0.76101	0.72815	0.67904	0.59505	0.46508	0.32303	0.16471	-0.00112
408.922	0.74508	0.78011	0.78568	0.76121	0.7277	0.67749	0.59283	0.46306	0.32156	0.16386	-0.00146
409.137	0.74621	0.78028	0.78652	0.7613	0.72712	0.67584	0.59056	0.46102	0.32011	0.16302	-0.00181
409.352	0.74727	0.78037	0.78726	0.76131	0.72643	0.67411	0.58825	0.45898	0.31869	0.16219	-0.00215
409.567	0.74828	0.78038	0.78792	0.76124	0.72564	0.67232	0.5859	0.45695	0.31727	0.16137	-0.00248
409.782	0.74923	0.78032	0.78851	0.7611	0.72476	0.67046	0.58353	0.45491	0.31587	0.16056	-0.00281
409.998	0.75012	0.78019	0.78902	0.7609	0.7238	0.66856	0.58114	0.45288	0.31448	0.15975	-0.00313
410.213	0.75095	0.78001	0.78947	0.76064	0.72277	0.6666	0.57873	0.45085	0.3131	0.15895	-0.00344
410.428	0.75173	0.77976	0.78984	0.76033	0.72165	0.66461	0.57631	0.44882	0.31173	0.15816	-0.00374
410.643	0.75245	0.77946	0.79014	0.75996	0.72046	0.66257	0.57388	0.4468	0.31038	0.15739	-0.00404
410.858	0.7531	0.77909	0.79037	0.75953	0.71918	0.66049	0.57144	0.44479	0.30903	0.15662	-0.00432
411.073	0.75368	0.77866	0.79051	0.75904	0.71783	0.65836	0.56898	0.44278	0.3077	0.15586	-0.00459
411.288	0.7542	0.77817	0.79059	0.75848	0.71642	0.6562	0.56651	0.44078	0.30639	0.15511	-0.00486
411.503	0.75465	0.77762	0.79058	0.75787	0.71493	0.65399	0.56403	0.43878	0.30508	0.15438	-0.0051
411.719	0.75504	0.777	0.7905	0.7572	0.71339	0.65176	0.56155	0.4368	0.3038	0.15367	-0.00534
411.934	0.75536	0.77633	0.79034	0.75647	0.71179	0.6495	0.55907	0.43484	0.30253	0.15297	-0.00556
412.149	0.75563	0.77561	0.7901	0.75569	0.71013	0.64722	0.5566	0.43291	0.30128	0.15228	-0.00577
412.364	0.75583	0.77483	0.78978	0.75485	0.70844	0.64493	0.55415	0.431	0.30006	0.15161	-0.00597
412.579	0.75597	0.774	0.78937	0.75396	0.70669	0.64263	0.55172	0.42913	0.29887	0.15096	-0.00616
412.794	0.75606	0.77312	0.78888	0.75301	0.70491	0.64032	0.54933	0.4273	0.2977	0.15034	-0.00634
413.008	0.75609	0.7722	0.78831	0.752	0.70309	0.63803	0.54697	0.42551	0.29657	0.14973	-0.0065
413.223	0.75608	0.77125	0.78767	0.75095	0.70124	0.63575	0.54466	0.42378	0.29548	0.14914	-0.00665
413.438	0.75604	0.77026	0.78695	0.74986	0.69937	0.63349	0.5424	0.4221	0.29443	0.14858	-0.00679
413.653	0.75596	0.76924	0.78615	0.74871	0.69749	0.63126	0.5402	0.42048	0.29341	0.14805	-0.00692
413.868	0.75585	0.76818	0.78527	0.74751	0.69558	0.62905	0.53806	0.41891	0.29244	0.14754	-0.00703
414.083	0.75568	0.76708	0.78429	0.74625	0.69365	0.62686	0.53598	0.41741	0.29151	0.14705	-0.00712
414.298	0.75548	0.76593	0.78324	0.74494	0.69169	0.62469	0.53395	0.41596	0.29062	0.1466	-0.0072
414.513	0.75523	0.76474	0.7821	0.74358	0.68972	0.62254	0.53197	0.41456	0.28977	0.14616	-0.00727
414.727	0.75493	0.76349	0.78088	0.74216	0.68772	0.62042	0.53004	0.41321	0.28896	0.14575	-0.00732
414.942	0.75456	0.76219	0.77958	0.74068	0.6857	0.6183	0.52814	0.4119	0.28818	0.14536	-0.00737
415.157	0.75416	0.76084	0.77822	0.73916	0.68366	0.61621	0.5263	0.41063	0.28743	0.14499	-0.0074
415.372	0.75374	0.75946	0.77682	0.73761	0.68163	0.61416	0.5245	0.4094	0.2867	0.14463	-0.00743
415.587	0.7533	0.75807	0.77539	0.73604	0.6796	0.61214	0.52274	0.4082	0.286	0.14429	-0.00744
415.801	0.75285	0.75666	0.77394	0.73445	0.67759	0.61016	0.52103	0.40704	0.28531	0.14396	-0.00746
416.016	0.7524	0.75523	0.77246	0.73286	0.6756	0.60822	0.51936	0.40592	0.28466	0.14365	-0.00746
416.231	0.75193	0.7538	0.77096	0.73125	0.67363	0.60632	0.51775	0.40484	0.28402	0.14335	-0.00745
416.445	0.75146	0.75235	0.76945	0.72964	0.67168	0.60446	0.51619	0.4038	0.28342	0.14306	-0.00744
416.66	0.75098	0.75088	0.7679	0.72802	0.66974	0.60264	0.51467	0.40279	0.28283	0.14279	-0.00743
416.875	0.75048	0.7494	0.76634	0.72638	0.66782	0.60085	0.51321	0.40183	0.28227	0.14253	-0.00741
417.089	0.74997	0.74791	0.76475	0.72473	0.66592	0.5991	0.51178	0.4009	0.28172	0.14228	-0.00738
417.304	0.74943	0.7464	0.76314	0.72308	0.66403	0.59739	0.51041	0.4	0.2812	0.14204	-0.00735
417.519	0.74888	0.74488	0.7615	0.72141	0.66216	0.59571	0.50906	0.39914	0.2807	0.14181	-0.00731
417.733	0.74831	0.74336	0.75985	0.71974	0.66031	0.59408	0.50776	0.3983	0.28022	0.1416	-0.00728
417.948	0.74773	0.74183	0.75818	0.71807	0.65848	0.59248	0.5065	0.3975	0.27975	0.14139	-0.00723
418.162	0.74713	0.7403	0.7565	0.71639	0.65668	0.59093	0.50528	0.39674	0.27931	0.1412	-0.00718
418.377	0.74651	0.73876	0.75479	0.71472	0.65489	0.58942	0.50411	0.39601	0.27889	0.14102	-0.00712
418.591	0.74588	0.7372	0.75306	0.71303	0.65313	0.58794	0.50297	0.39531	0.27849	0.14085	-0.00706
418.806	0.74521	0.73564	0.75129	0.71134	0.65138	0.5865	0.50186	0.39463	0.2781	0.1407	-0.00699
419.02	0.74452	0.73406	0.74951	0.70964	0.64965	0.58507	0.50078	0.39397	0.27772	0.14054	-0.00692
419.235	0.74381	0.73247	0.74771	0.70793	0.64792	0.58367	0.49972	0.39333	0.27735	0.14039	-0.00685
419.449	0.74308	0.73089	0.74591	0.70623	0.64622	0.58229	0.49868	0.39272	0.277	0.14025	-0.00677
419.664	0.74232	0.7293	0.74409	0.70453	0.64454	0.58094	0.49767	0.39212	0.27665	0.14012	-0.00669
419.878	0.74155	0.72771	0.74227	0.70283	0.64289	0.57962	0.49669	0.39154	0.27632	0.13999	-0.00661
420.092	0.74076	0.72611	0.74044	0.70113	0.64126	0.57833	0.49573	0.39098	0.276	0.13986	-0.00652
420.307	0.73996	0.72452	0.7386	0.69945	0.63965	0.57707	0.49481	0.39044	0.27569	0.13975	-0.00644
420.521	0.73914	0.72292	0.73677	0.69776	0.63808	0.57583	0.49391	0.38992	0.27539	0.13964	-0.00635
420.736	0.7383	0.72132	0.73493	0.69608	0.63652	0.57462	0.49303	0.38943	0.2751	0.13953	-0.00626
420.95	0.73743	0.7197	0.73308	0.6944	0.63497	0.57342	0.49217	0.38894	0.27482	0.13943	-0.00616
421.164	0.73653	0.71808	0.73123	0.69273	0.63344	0.57224	0.49133	0.38847	0.27455	0.13934	-0.00606
421.379	0.73562	0.71644	0.72937	0.69105	0.63193	0.57108	0.49051	0.38802	0.27429	0.13926	-0.00596
421.593	0.73467	0.7148	0.72752	0.68939	0.63043	0.56994	0.48971	0.38757	0.27404	0.13917	-0.00586
421.807	0.73371	0.71315	0.72566	0.68773	0.62895	0.56882	0.48893	0.38715	0.2738	0.1391	-0.00575
422.021	0.73273	0.71148	0.7238	0.68608	0.6275	0.56771	0.48816	0.38673	0.27356	0.13902	-0.00565
422.236	0.73171	0.7098	0.72192	0.68442	0.62605	0.56662	0.48742	0.38633	0.27333	0.13895	-0.00555
422.45	0.73066	0.70809	0.72004	0.68276	0.62462	0.56555	0.48668	0.38593	0.27311	0.13889	-0.00544
422.664	0.72957	0.70636	0.71814	0.68108	0.62319	0.56448	0.48596	0.38553	0.27289	0.13882	-0.00534
422.878	0.72844	0.7046	0.71623	0.6794	0.62177	0.56342	0.48525	0.38515	0.27267	0.13876	-0.00524
423.092	0.72728	0.70281	0.7143	0.6777	0.62036	0.56236	0.48456	0.38476	0.27245	0.13869	-0.00515
423.306	0.72608	0.70099	0.71236	0.676	0.61895	0.56131	0.48386	0.38438	0.27223	0.13863	-0.00506
423.521	0.72484	0.69914	0.7104	0.67428	0.61754	0.56026	0.48318	0.38399	0.27201	0.13856	-0.00497
423.735	0.72355	0.69726	0.70844	0.67256	0.61614	0.55922	0.48249	0.38361	0.27179	0.13848	-0.0049
423.949	0.72223	0.69535	0.70645	0.67083	0.61474	0.55818	0.48181	0.38322	0.27156	0.1384	-0.00484
424.163	0.72086	0.6934	0.70446	0.6691	0.61334	0.55715	0.48113	0.38283	0.27132	0.13832	-0.00478
424.377	0.71945	0.69142	0.70245	0.66735	0.61194	0.55611	0.48045	0.38243	0.27108	0.13822	-0.00474
424.591	0.71798	0.6894	0.70041	0.6656	0.61054	0.55507	0.47977	0.38203	0.27083	0.13812	-0.00471
424.805	0.71645	0.68734	0.69836	0.66382	0.60914	0.55402	0.47908	0.38161	0.27057	0.13801	-0.00469
425.019	0.71487	0.68524	0.69629	0.66203	0.60772	0.55296	0.47838	0.38119	0.27029	0.13788	-0.00469
425.233	0.71324	0.6831	0.69419	0.66023	0.6063	0.5519	0.47767	0.38075	0.27	0.13774	-0.00471
425.447	0.71155	0.68092	0.69209	0.65841	0.60488	0.55083	0.47695	0.38031	0.2697	0.13759	-0.00474
425.661	0.70981	0.67871	0.68996	0.65657	0.60346	0.54975	0.47623	0.37986	0.26939	0.13743	-0.00478
425.875	0.70801	0.67644	0.68781	0.65472	0.60202	0.54866	0.47549	0.37939	0.26907	0.13725	-0.00483
426.089	0.70615	0.67414	0.68563	0.65283	0.60058	0.54755	0.47474	0.3789	0.26874	0.13707	-0.0049
426.303	0.70421	0.67178	0.68343	0.65092	0.59911	0.54643	0.47397	0.3784	0.26839	0.13687	-0.00498
426.517	0.70222	0.66938	0.6812	0.64899	0.59764	0.54529	0.47318	0.37789	0.26802	0.13665	-0.00508
426.73	0.70016	0.66694	0.67894	0.64703	0.59615	0.54413	0.47238	0.37735	0.26764	0.13642	-0.0052
426.944	0.69804	0.66444	0.67665	0.64504	0.59463	0.54294	0.47156	0.37679	0.26724	0.13617	-0.00534
427.158	0.69585	0.6619	0.67432	0.64301	0.59309	0.54173	0.47071	0.37622	0.26682	0.13591	-0.00549
427.372	0.69361	0.65932	0.67197	0.64096	0.59153	0.54049	0.46984	0.37562	0.26638	0.13563	-0.00566
427.586	0.69131	0.65671	0.6696	0.63889	0.58995	0.53924	0.46895	0.375	0.26593	0.13534	-0.00584
427.8	0.68897	0.65406	0.6672	0.63681	0.58836	0.53797	0.46805	0.37437	0.26547	0.13503	-0.00604
428.013	0.68657	0.65137	0.66478	0.6347	0.58675	0.53668	0.46713	0.37372	0.26499	0.13471	-0.00625
428.227	0.68412	0.64866	0.66234	0.63256	0.58511	0.53538	0.46618	0.37305	0.26449	0.13437	-0.00648
428.441	0.68162	0.6459	0.65986	0.6304	0.58346	0.53405	0.46522	0.37236	0.26398	0.13402	-0.00673
428.655	0.67907	0.64312	0.65736	0.62822	0.58178	0.5327	0.46423	0.37165	0.26345	0.13365	-0.00699
428.868	0.67647	0.64031	0.65484	0.62602	0.58009	0.53133	0.46323	0.37093	0.26291	0.13327	-0.00727
429.082	0.67384	0.63748	0.6523	0.62381	0.57839	0.52995	0.46221	0.37019	0.26235	0.13288	-0.00756
429.296	0.67117	0.63463	0.64974	0.62157	0.57667	0.52856	0.46117	0.36944	0.26179	0.13248	-0.00786
429.509	0.66845	0.63175	0.64715	0.61932	0.57493	0.52714	0.46012	0.36867	0.26121	0.13206	-0.00818
429.723	0.66568	0.62884	0.64454	0.61705	0.57317	0.52572	0.45905	0.36788	0.26063	0.13164	-0.0085
429.937	0.66289	0.62591	0.64191	0.61476	0.57141	0.52428	0.45797	0.36708	0.26003	0.1312	-0.00884
430.15	0.66005	0.62296	0.63926	0.61246	0.56964	0.52283	0.45688	0.36627	0.25942	0.13076	-0.00919
430.364	0.65718	0.61999	0.63659	0.61014	0.56785	0.52136	0.45577	0.36545	0.25881	0.13032	-0.00955
430.577	0.65427	0.617	0.6339	0.60781	0.56605	0.51989	0.45466	0.36461	0.25819	0.12986	-0.00991
430.791	0.65133	0.614	0.6312	0.60548	0.56425	0.51841	0.45353	0.36378	0.25757	0.12941	-0.01027
431.004	0.64836	0.61098	0.62848	0.60313	0.56244	0.51692	0.45239	0.36293	0.25694	0.12895	-0.01064
431.218	0.64536	0.60795	0.62576	0.60079	0.56062	0.51542	0.45125	0.36208	0.25632	0.12849	-0.01101
431.431	0.64235	0.60491	0.62303	0.59844	0.55881	0.51392	0.4501	0.36123	0.25569	0.12803	-0.01138
431.645	0.63931	0.60187	0.6203	0.59609	0.55699	0.51242	0.44895	0.36037	0.25506	0.12757	-0.01175
431.858	0.63627	0.59883	0.61757	0.59375	0.55518	0.51092	0.4478	0.35951	0.25443	0.12711	-0.01213
432.072	0.63321	0.59579	0.61485	0.59142	0.55338	0.50943	0.44665	0.35865	0.25381	0.12665	-0.0125
432.285	0.63015	0.59276	0.61213	0.58909	0.55159	0.50794	0.4455	0.3578	0.2532	0.1262	-0.01286
432.499	0.62709	0.58974	0.60942	0.58678	0.5498	0.50647	0.44436	0.35694	0.25258	0.12575	-0.01323
432.712	0.62403	0.58673	0.60673	0.58448	0.54802	0.50499	0.44322	0.35609	0.25197	0.1253	-0.01359
432.926	0.62096	0.58373	0.60404	0.58219	0.54626	0.50353	0.44208	0.35524	0.25137	0.12486	-0.01396
433.139	0.6179	0.58074	0.60137	0.57991	0.54451	0.50209	0.44095	0.3544	0.25077	0.12442	-0.01432
433.352	0.61483	0.57777	0.59872	0.57766	0.54277	0.50065	0.43982	0.35356	0.25018	0.12398	-0.01467
433.566	0.61177	0.57482	0.59608	0.57541	0.54105	0.49923	0.4387	0.35272	0.24959	0.12354	-0.01502
433.779	0.60873	0.57189	0.59347	0.5732	0.53935	0.49782	0.4376	0.3519	0.24902	0.12312	-0.01537
433.992	0.6057	0.569	0.59088	0.57101	0.53767	0.49645	0.43651	0.35109	0.24845	0.1227	-0.0157
434.206	0.60269	0.56613	0.58833	0.56885	0.53603	0.49509	0.43544	0.3503	0.2479	0.1223	-0.01603
434.419	0.59971	0.5633	0.58581	0.56673	0.53441	0.49377	0.43438	0.34953	0.24737	0.1219	-0.01634
434.632	0.59675	0.5605	0.58333	0.56464	0.53283	0.49247	0.43335	0.34877	0.24685	0.12152	-0.01664
434.845	0.59381	0.55773	0.58087	0.56258	0.53127	0.4912	0.43234	0.34803	0.24635	0.12115	-0.01693
435.059	0.59089	0.55499	0.57844	0.56055	0.52974	0.48995	0.43134	0.34731	0.24586	0.12079	-0.01721
435.272	0.588	0.55228	0.57604	0.55855	0.52824	0.48873	0.43037	0.3466	0.24539	0.12045	-0.01748
435.485	0.58513	0.54961	0.57368	0.5566	0.52677	0.48754	0.42942	0.34592	0.24493	0.12011	-0.01774
435.698	0.5823	0.54698	0.57136	0.55468	0.52534	0.48639	0.4285	0.34525	0.24449	0.11979	-0.01799
435.911	0.5795	0.5444	0.56907	0.5528	0.52395	0.48526	0.42761	0.34461	0.24407	0.11948	-0.01823
436.124	0.57674	0.54186	0.56684	0.55097	0.5226	0.48418	0.42674	0.34399	0.24367	0.11918	-0.01846
436.338	0.57403	0.53937	0.56465	0.54919	0.52129	0.48314	0.42591	0.3434	0.24329	0.11891	-0.01866
436.551	0.57135	0.53693	0.5625	0.54746	0.52002	0.48213	0.42511	0.34284	0.24293	0.11865	-0.01885
436.764	0.5687	0.53453	0.5604	0.54576	0.51879	0.48115	0.42434	0.3423	0.24259	0.11841	-0.01903
436.977	0.56607	0.53216	0.55832	0.54409	0.51758	0.4802	0.42358	0.34178	0.24227	0.11818	-0.01919
437.19	0.56344	0.52981	0.55626	0.54245	0.5164	0.47927	0.42285	0.34127	0.24196	0.11797	-0.01934
437.403	0.56083	0.52749	0.55422	0.54083	0.51523	0.47837	0.42214	0.34078	0.24167	0.11777	-0.01948
437.616	0.55823	0.52519	0.5522	0.53924	0.51409	0.47748	0.42144	0.34031	0.24139	0.11758	-0.0196
437.829	0.55565	0.52292	0.55021	0.53767	0.51296	0.47662	0.42076	0.33985	0.24113	0.11741	-0.01971
438.042	0.55307	0.52068	0.54824	0.53614	0.51186	0.47578	0.42011	0.33941	0.24088	0.11725	-0.01981
438.255	0.55051	0.51846	0.5463	0.53462	0.51078	0.47497	0.41947	0.33899	0.24064	0.1171	-0.0199
438.468	0.54796	0.51625	0.54437	0.53313	0.50972	0.47417	0.41884	0.33858	0.24042	0.11696	-0.01998
438.681	0.54541	0.51407	0.54246	0.53167	0.50868	0.47339	0.41824	0.33819	0.24021	0.11683	-0.02004
438.894	0.54288	0.51192	0.54058	0.53022	0.50766	0.47264	0.41765	0.33782	0.24001	0.11672	-0.0201
439.107	0.54036	0.50978	0.53873	0.52881	0.50666	0.47191	0.41709	0.33746	0.23982	0.11662	-0.02014
439.319	0.53785	0.50767	0.53689	0.52742	0.50568	0.4712	0.41654	0.33712	0.23965	0.11653	-0.02017
439.532	0.53536	0.50558	0.53509	0.52606	0.50473	0.47051	0.41601	0.33679	0.23948	0.11645	-0.0202
439.745	0.53288	0.50352	0.53331	0.52473	0.5038	0.46984	0.41551	0.33648	0.23933	0.11637	-0.02022
439.958	0.53042	0.50147	0.53155	0.52342	0.50288	0.4692	0.41502	0.33618	0.23919	0.11631	-0.02023
440.171	0.52796	0.49945	0.52982	0.52214	0.50199	0.46858	0.41455	0.3359	0.23906	0.11626	-0.02023
440.384	0.52553	0.49745	0.52811	0.52088	0.50112	0.46798	0.4141	0.33564	0.23894	0.11621	-0.02022
440.596	0.5231	0.49547	0.52642	0.51965	0.50027	0.46739	0.41367	0.33538	0.23883	0.11618	-0.02021
440.809	0.52068	0.4935	0.52475	0.51843	0.49944	0.46682	0.41325	0.33514	0.23872	0.11615	-0.02019
441.022	0.51827	0.49155	0.5231	0.51724	0.49862	0.46627	0.41284	0.33491	0.23862	0.11612	-0.02017
441.235	0.51586	0.48962	0.52147	0.51607	0.49781	0.46573	0.41245	0.33468	0.23853	0.1161	-0.02015
441.447	0.51346	0.4877	0.51985	0.51491	0.49702	0.4652	0.41206	0.33446	0.23843	0.11608	-0.02012
441.66	0.51107	0.48579	0.51825	0.51376	0.49624	0.46468	0.41169	0.33425	0.23834	0.11607	-0.02009
441.873	0.50868	0.4839	0.51667	0.51264	0.49547	0.46417	0.41133	0.33405	0.23826	0.11606	-0.02007
442.085	0.5063	0.48202	0.5151	0.51153	0.49472	0.46367	0.41098	0.33385	0.23818	0.11605	-0.02004
442.298	0.50393	0.48015	0.51355	0.51044	0.49398	0.46319	0.41064	0.33366	0.2381	0.11605	-0.02
442.511	0.50156	0.4783	0.51201	0.50936	0.49325	0.46271	0.41031	0.33348	0.23803	0.11605	-0.01997
442.723	0.49919	0.47645	0.51049	0.50829	0.49252	0.46223	0.40998	0.3333	0.23796	0.11605	-0.01993
442.936	0.49681	0.47461	0.50897	0.50723	0.4918	0.46176	0.40967	0.33313	0.23789	0.11605	-0.0199
443.148	0.49443	0.47277	0.50745	0.50617	0.49109	0.46129	0.40935	0.33296	0.23782	0.11606	-0.01986
443.361	0.49205	0.47094	0.50594	0.50511	0.49037	0.46082	0.40904	0.33279	0.23775	0.11607	-0.01983
443.574	0.48967	0.46911	0.50445	0.50407	0.48966	0.46035	0.40874	0.33262	0.23768	0.11607	-0.01979
443.786	0.48729	0.46729	0.50296	0.50304	0.48896	0.45989	0.40844	0.33246	0.23761	0.11608	-0.01976
443.999	0.48492	0.46548	0.50149	0.50201	0.48827	0.45943	0.40816	0.3323	0.23754	0.11609	-0.01972
444.211	0.48254	0.46368	0.50003	0.501	0.48759	0.45898	0.40788	0.33215	0.23748	0.1161	-0.01969
444.424	0.48017	0.46188	0.49857	0.49999	0.48691	0.45853	0.4076	0.33201	0.23741	0.11611	-0.01966
444.636	0.4778	0.46009	0.49713	0.499	0.48624	0.45808	0.40734	0.33187	0.23735	0.11613	-0.01963
444.849	0.47543	0.45831	0.4957	0.498	0.48557	0.45764	0.40707	0.33173	0.23729	0.11614	-0.01959
445.061	0.47305	0.45653	0.49427	0.49702	0.48491	0.4572	0.40682	0.3316	0.23723	0.11616	-0.01956
445.273	0.47068	0.45475	0.49285	0.49604	0.48425	0.45677	0.40657	0.33147	0.23718	0.11618	-0.01952
445.486	0.46831	0.45299	0.49145	0.49507	0.4836	0.45633	0.40633	0.33135	0.23713	0.1162	-0.01949
445.698	0.46594	0.45123	0.49005	0.4941	0.48296	0.45591	0.40609	0.33123	0.23708	0.11623	-0.01945
445.91	0.46356	0.44947	0.48866	0.49315	0.48232	0.45549	0.40587	0.33112	0.23704	0.11626	-0.01941
446.123	0.46119	0.44773	0.48729	0.4922	0.48169	0.45507	0.40565	0.33102	0.23699	0.11628	-0.01937
446.335	0.45883	0.44599	0.48592	0.49126	0.48106	0.45466	0.40544	0.33091	0.23696	0.11632	-0.01933
446.547	0.45646	0.44427	0.48458	0.49034	0.48045	0.45426	0.40524	0.33082	0.23692	0.11635	-0.01929
446.76	0.45411	0.44255	0.48324	0.48942	0.47985	0.45386	0.40504	0.33073	0.23689	0.11638	-0.01926
446.972	0.45175	0.44085	0.48192	0.48852	0.47925	0.45347	0.40486	0.33065	0.23686	0.11642	-0.01922
447.184	0.4494	0.43915	0.4806	0.48762	0.47866	0.45309	0.40468	0.33056	0.23684	0.11645	-0.01919
447.397	0.44706	0.43745	0.4793	0.48674	0.47807	0.45271	0.4045	0.33049	0.23681	0.11648	-0.01916
447.609	0.44471	0.43577	0.478	0.48586	0.4775	0.45234	0.40434	0.33042	0.23679	0.11652	-0.01912
447.821	0.44237	0.43409	0.47672	0.48499	0.47693	0.45197	0.40417	0.33035	0.23677	0.11655	-0.01909
448.033	0.44004	0.43242	0.47545	0.48413	0.47636	0.45161	0.40402	0.33028	0.23675	0.11659	-0.01906
448.245	0.4377	0.43075	0.47418	0.48327	0.4758	0.45125	0.40387	0.33022	0.23674	0.11662	-0.01903
448.458	0.43537	0.42908	0.47292	0.48242	0.47525	0.45089	0.40372	0.33016	0.23672	0.11666	-0.019
448.67	0.43304	0.42742	0.47167	0.48158	0.4747	0.45054	0.40357	0.3301	0.23671	0.1167	-0.01897
448.882	0.4307	0.42576	0.47041	0.48073	0.47414	0.45018	0.40343	0.33004	0.2367	0.11674	-0.01894
449.094	0.42836	0.4241	0.46916	0.47988	0.47359	0.44982	0.40329	0.32999	0.23669	0.11678	-0.01891
449.306	0.42602	0.42244	0.46792	0.47904	0.47304	0.44947	0.40314	0.32993	0.23669	0.11682	-0.01887
449.518	0.42368	0.42078	0.46667	0.47819	0.47249	0.44911	0.403	0.32988	0.23668	0.11686	-0.01883
449.73	0.42134	0.41912	0.46543	0.47735	0.47194	0.44876	0.40286	0.32982	0.23668	0.1169	-0.01879
449.942	0.41901	0.41748	0.4642	0.47652	0.47139	0.44841	0.40273	0.32978	0.23668	0.11694	-0.01875
450.154	0.41668	0.41583	0.46297	0.47569	0.47086	0.44806	0.4026	0.32973	0.23668	0.11699	-0.01872
450.366	0.41436	0.4142	0.46175	0.47486	0.47032	0.44772	0.40247	0.32969	0.23669	0.11703	-0.01868
450.578	0.41203	0.41256	0.46054	0.47404	0.46979	0.44739	0.40234	0.32965	0.2367	0.11708	-0.01864
450.79	0.40972	0.41094	0.45933	0.47323	0.46926	0.44705	0.40222	0.32961	0.23671	0.11712	-0.0186
451.002	0.40741	0.40932	0.45813	0.47242	0.46874	0.44673	0.4021	0.32958	0.23672	0.11717	-0.01856
451.214	0.4051	0.4077	0.45694	0.47161	0.46822	0.4464	0.40199	0.32955	0.23674	0.11721	-0.01852
451.426	0.4028	0.40609	0.45575	0.4708	0.46771	0.44608	0.40187	0.32952	0.23675	0.11725	-0.01849
451.638	0.40049	0.40448	0.45457	0.47	0.4672	0.44576	0.40176	0.32949	0.23677	0.1173	-0.01845
451.85	0.39819	0.40288	0.45338	0.4692	0.46669	0.44544	0.40164	0.32946	0.23679	0.11734	-0.01842
452.062	0.3959	0.40127	0.4522	0.4684	0.46618	0.44513	0.40153	0.32943	0.2368	0.11737	-0.01839
452.274	0.3936	0.39967	0.45103	0.4676	0.46567	0.44481	0.40141	0.3294	0.23682	0.11741	-0.01837
452.485	0.39131	0.39807	0.44985	0.4668	0.46516	0.4445	0.40129	0.32936	0.23683	0.11744	-0.01835
452.697	0.38902	0.39648	0.44868	0.46601	0.46466	0.44419	0.40117	0.32933	0.23684	0.11747	-0.01833
452.909	0.38673	0.39489	0.44752	0.46522	0.46416	0.44388	0.40106	0.3293	0.23686	0.1175	-0.01831
453.121	0.38445	0.3933	0.44635	0.46443	0.46366	0.44357	0.40094	0.32927	0.23687	0.11753	-0.0183
453.333	0.38217	0.39172	0.44519	0.46364	0.46316	0.44327	0.40082	0.32924	0.23689	0.11756	-0.01828
453.544	0.37989	0.39014	0.44404	0.46286	0.46267	0.44297	0.4007	0.32921	0.23691	0.11758	-0.01827
453.756	0.37762	0.38857	0.44288	0.46208	0.46218	0.44267	0.40059	0.32918	0.23692	0.11761	-0.01826
453.968	0.37536	0.38701	0.44174	0.4613	0.4617	0.44238	0.40047	0.32916	0.23694	0.11764	-0.01825
454.18	0.3731	0.38545	0.4406	0.46053	0.46122	0.44209	0.40036	0.32913	0.23697	0.11767	-0.01823
454.391	0.37084	0.3839	0.43946	0.45976	0.46074	0.44181	0.40024	0.32911	0.23699	0.1177	-0.01822
454.603	0.36859	0.38236	0.43832	0.45899	0.46027	0.44153	0.40012	0.32909	0.23702	0.11773	-0.01821
454.815	0.36634	0.38082	0.43718	0.45822	0.45979	0.44124	0.40001	0.32907	0.23704	0.11776	-0.01819
455.026	0.36409	0.37928	0.43605	0.45745	0.45932	0.44096	0.39988	0.32905	0.23707	0.1178	-0.01818
455.238	0.36184	0.37774	0.43491	0.45668	0.45884	0.44067	0.39975	0.32902	0.23709	0.11783	-0.01817
455.449	0.35959	0.3762	0.43377	0.4559	0.45835	0.44038	0.39962	0.32899	0.23711	0.11786	-0.01816
455.661	0.35735	0.37467	0.43263	0.45512	0.45787	0.44009	0.39948	0.32896	0.23713	0.11788	-0.01815
455.873	0.3551	0.37314	0.43149	0.45434	0.45739	0.4398	0.39934	0.32893	0.23715	0.11791	-0.01815
456.084	0.35286	0.37161	0.43036	0.45356	0.4569	0.43951	0.3992	0.32889	0.23717	0.11794	-0.01814
456.296	0.35062	0.37009	0.42922	0.45278	0.45641	0.43922	0.39905	0.32886	0.23718	0.11796	-0.01814
456.507	0.34839	0.36857	0.42808	0.452	0.45592	0.43892	0.3989	0.32882	0.2372	0.11799	-0.01814
456.719	0.34615	0.36706	0.42694	0.45121	0.45542	0.43862	0.39874	0.32878	0.23721	0.11801	-0.01814
456.93	0.34392	0.36554	0.4258	0.45043	0.45493	0.43832	0.39858	0.32873	0.23722	0.11804	-0.01814
457.142	0.34169	0.36403	0.42467	0.44964	0.45443	0.43802	0.39842	0.32869	0.23723	0.11806	-0.01814
457.353	0.33946	0.36252	0.42353	0.44885	0.45393	0.43772	0.39825	0.32864	0.23724	0.11808	-0.01815
457.565	0.33723	0.36102	0.42239	0.44807	0.45343	0.43742	0.39808	0.32859	0.23725	0.1181	-0.01815
457.776	0.33501	0.35952	0.42126	0.44728	0.45293	0.43711	0.39791	0.32854	0.23725	0.11812	-0.01816
457.987	0.3328	0.35802	0.42014	0.4465	0.45244	0.43681	0.39774	0.32849	0.23726	0.11814	-0.01817
458.199	0.33059	0.35653	0.41901	0.44572	0.45194	0.43652	0.39757	0.32844	0.23726	0.11816	-0.01818
458.41	0.32839	0.35505	0.4179	0.44495	0.45145	0.43622	0.3974	0.32839	0.23727	0.11817	-0.01819
458.621	0.3262	0.35357	0.41678	0.44418	0.45096	0.43593	0.39723	0.32834	0.23728	0.11819	-0.0182
458.833	0.32401	0.3521	0.41568	0.44341	0.45048	0.43564	0.39706	0.32829	0.23729	0.11821	-0.01822
459.044	0.32183	0.35064	0.41458	0.44265	0.44999	0.43535	0.39689	0.32824	0.23729	0.11823	-0.01823
459.255	0.31966	0.34918	0.41348	0.4419	0.44952	0.43507	0.39672	0.3282	0.2373	0.11825	-0.01825
459.467	0.3175	0.34773	0.41239	0.44114	0.44904	0.43479	0.39656	0.32815	0.23731	0.11827	-0.01826
459.678	0.31535	0.34629	0.41131	0.4404	0.44858	0.43452	0.3964	0.32811	0.23733	0.11829	-0.01828
459.889	0.3132	0.34485	0.41023	0.43966	0.44812	0.43426	0.39624	0.32807	0.23734	0.11832	-0.01829
460.101	0.31106	0.34342	0.40916	0.43893	0.44766	0.43399	0.39609	0.32804	0.23736	0.11834	-0.01831
460.312	0.30894	0.342	0.4081	0.4382	0.44721	0.43373	0.39594	0.32801	0.23738	0.11837	-0.01832
460.523	0.30682	0.34059	0.40705	0.43748	0.44676	0.43348	0.3958	0.32798	0.2374	0.1184	-0.01834
460.734	0.3047	0.33918	0.406	0.43676	0.44631	0.43323	0.39565	0.32795	0.23742	0.11843	-0.01835
460.945	0.3026	0.33777	0.40495	0.43605	0.44587	0.43298	0.39551	0.32793	0.23745	0.11846	-0.01836
461.156	0.3005	0.33637	0.40391	0.43535	0.44544	0.43274	0.39537	0.32791	0.23747	0.11849	-0.01838
461.368	0.29841	0.33498	0.40288	0.43465	0.44501	0.4325	0.39524	0.32789	0.2375	0.11852	-0.01839
461.579	0.29634	0.3336	0.40186	0.43396	0.44458	0.43227	0.39511	0.32787	0.23753	0.11855	-0.0184
461.79	0.29427	0.33223	0.40085	0.43328	0.44417	0.43204	0.39499	0.32787	0.23756	0.11859	-0.01841
462.001	0.29222	0.33087	0.39985	0.43261	0.44377	0.43183	0.39488	0.32786	0.2376	0.11863	-0.01842
462.212	0.29018	0.32952	0.39886	0.43195	0.44337	0.43162	0.39477	0.32786	0.23764	0.11868	-0.01843
462.423	0.28815	0.32818	0.39788	0.4313	0.44299	0.43142	0.39468	0.32788	0.23769	0.11873	-0.01843
462.634	0.28614	0.32686	0.39692	0.43067	0.44262	0.43124	0.39459	0.32789	0.23774	0.11878	-0.01843
462.845	0.28414	0.32554	0.39597	0.43005	0.44226	0.43106	0.39451	0.32792	0.2378	0.11884	-0.01843
463.056	0.28215	0.32424	0.39503	0.42944	0.44191	0.4309	0.39445	0.32795	0.23787	0.1189	-0.01843
463.267	0.28018	0.32295	0.3941	0.42884	0.44158	0.43074	0.39439	0.32799	0.23793	0.11896	-0.01843
463.478	0.27822	0.32167	0.39318	0.42826	0.44125	0.43059	0.39434	0.32804	0.23801	0.11902	-0.01843
463.689	0.27627	0.3204	0.39228	0.42768	0.44094	0.43046	0.3943	0.32809	0.23808	0.11909	-0.01843
463.9	0.27434	0.31914	0.39139	0.42712	0.44064	0.43033	0.39427	0.32815	0.23817	0.11916	-0.01842
464.111	0.27242	0.31789	0.39051	0.42658	0.44035	0.43022	0.39425	0.32822	0.23825	0.11923	-0.01842
464.322	0.27051	0.31665	0.38964	0.42604	0.44008	0.43011	0.39423	0.32829	0.23834	0.1193	-0.01842
464.533	0.26861	0.31542	0.38878	0.42552	0.43981	0.43002	0.39423	0.32837	0.23844	0.11938	-0.01842
464.743	0.26673	0.3142	0.38793	0.425	0.43956	0.42993	0.39423	0.32846	0.23853	0.11946	-0.01841
464.954	0.26485	0.313	0.3871	0.4245	0.43932	0.42985	0.39425	0.32855	0.23863	0.11953	-0.01841
465.165	0.26299	0.3118	0.38627	0.42401	0.43908	0.42979	0.39427	0.32865	0.23874	0.11961	-0.01841
465.376	0.26114	0.31061	0.38546	0.42352	0.43886	0.42973	0.39429	0.32875	0.23884	0.11969	-0.01841
465.587	0.25929	0.30942	0.38465	0.42305	0.43865	0.42968	0.39433	0.32886	0.23896	0.11977	-0.01841
465.798	0.25746	0.30825	0.38386	0.42259	0.43844	0.42964	0.39438	0.32898	0.23907	0.11985	-0.01841
466.008	0.25564	0.30709	0.38307	0.42214	0.43825	0.42961	0.39443	0.3291	0.23919	0.11994	-0.01841
466.219	0.25382	0.30594	0.3823	0.42171	0.43808	0.42958	0.39449	0.32923	0.23932	0.12002	-0.01841
466.43	0.25202	0.3048	0.38154	0.42128	0.43791	0.42957	0.39456	0.32937	0.23944	0.12011	-0.01841
466.64	0.25023	0.30367	0.38079	0.42087	0.43775	0.42957	0.39464	0.32951	0.23958	0.1202	-0.01842
466.851	0.24845	0.30254	0.38005	0.42047	0.4376	0.42958	0.39473	0.32966	0.23972	0.12029	-0.01842
467.062	0.24667	0.30143	0.37932	0.42008	0.43747	0.4296	0.39483	0.32982	0.23986	0.12039	-0.01842
467.273	0.24491	0.30033	0.37861	0.4197	0.43734	0.42962	0.39494	0.32998	0.24001	0.12049	-0.01841
467.483	0.24316	0.29924	0.3779	0.41933	0.43723	0.42965	0.39505	0.33016	0.24017	0.12059	-0.01841
467.694	0.24142	0.29816	0.3772	0.41897	0.43712	0.4297	0.39517	0.33034	0.24033	0.12069	-0.01841
467.904	0.23968	0.29708	0.37651	0.41861	0.43702	0.42974	0.3953	0.33052	0.24049	0.1208	-0.0184
468.115	0.23796	0.29602	0.37583	0.41827	0.43693	0.4298	0.39543	0.33071	0.24066	0.12091	-0.01839
468.326	0.23624	0.29496	0.37516	0.41793	0.43684	0.42986	0.39557	0.3309	0.24084	0.12102	-0.01839
468.536	0.23453	0.29391	0.3745	0.4176	0.43676	0.42992	0.39572	0.3311	0.24101	0.12113	-0.01838
468.747	0.23283	0.29287	0.37384	0.41728	0.43669	0.43	0.39587	0.3313	0.24119	0.12124	-0.01837
468.957	0.23114	0.29183	0.37319	0.41697	0.43663	0.43008	0.39602	0.33151	0.24138	0.12136	-0.01836
469.168	0.22946	0.29081	0.37256	0.41667	0.43657	0.43017	0.39619	0.33172	0.24157	0.12148	-0.01836
469.378	0.22779	0.28979	0.37193	0.41638	0.43653	0.43026	0.39636	0.33194	0.24176	0.1216	-0.01835
469.589	0.22612	0.28879	0.37131	0.4161	0.43649	0.43036	0.39654	0.33217	0.24196	0.12172	-0.01834
469.799	0.22446	0.28779	0.3707	0.41582	0.43646	0.43047	0.39672	0.3324	0.24216	0.12185	-0.01834
470.01	0.22282	0.28679	0.3701	0.41555	0.43643	0.43059	0.39692	0.33263	0.24236	0.12197	-0.01833
470.22	0.22118	0.28581	0.36951	0.4153	0.43642	0.43071	0.39711	0.33287	0.24257	0.1221	-0.01833
470.43	0.21955	0.28484	0.36893	0.41505	0.43642	0.43084	0.39732	0.33312	0.24278	0.12223	-0.01832
470.641	0.21794	0.28388	0.36836	0.41481	0.43642	0.43098	0.39754	0.33337	0.243	0.12237	-0.01832
470.851	0.21633	0.28292	0.3678	0.41459	0.43644	0.43113	0.39776	0.33363	0.24323	0.12251	-0.01831
471.062	0.21473	0.28198	0.36724	0.41437	0.43646	0.43128	0.39799	0.3339	0.24345	0.12265	-0.0183
471.272	0.21314	0.28104	0.3667	0.41416	0.43649	0.43144	0.39822	0.33417	0.24369	0.12279	-0.01829
471.482	0.21156	0.28011	0.36617	0.41396	0.43653	0.43161	0.39846	0.33444	0.24392	0.12294	-0.01828
471.693	0.20998	0.27919	0.36564	0.41377	0.43657	0.43178	0.3987	0.33472	0.24416	0.12309	-0.01828
471.903	0.20841	0.27828	0.36512	0.41358	0.43662	0.43196	0.39895	0.335	0.2444	0.12324	-0.01827
472.113	0.20685	0.27737	0.36461	0.41339	0.43667	0.43214	0.39921	0.33529	0.24465	0.12339	-0.01826
472.323	0.2053	0.27647	0.36411	0.41322	0.43673	0.43233	0.39946	0.33558	0.2449	0.12354	-0.01825
472.534	0.20376	0.27557	0.36361	0.41304	0.4368	0.43252	0.39973	0.33587	0.24515	0.1237	-0.01824
472.744	0.20222	0.27469	0.36312	0.41288	0.43687	0.43272	0.39999	0.33617	0.2454	0.12386	-0.01822
472.954	0.20068	0.2738	0.36264	0.41272	0.43694	0.43292	0.40026	0.33646	0.24566	0.12402	-0.01821
473.164	0.19916	0.27293	0.36216	0.41256	0.43702	0.43312	0.40053	0.33677	0.24592	0.12418	-0.0182
473.374	0.19764	0.27206	0.36169	0.4124	0.4371	0.43333	0.40081	0.33707	0.24618	0.12434	-0.01819
473.585	0.19612	0.27119	0.36122	0.41225	0.43719	0.43354	0.40108	0.33737	0.24644	0.1245	-0.01818
473.795	0.19461	0.27032	0.36075	0.4121	0.43727	0.43375	0.40136	0.33768	0.2467	0.12466	-0.01817
474.005	0.1931	0.26946	0.36029	0.41195	0.43736	0.43397	0.40163	0.33798	0.24696	0.12482	-0.01816
474.215	0.19159	0.2686	0.35983	0.4118	0.43745	0.43418	0.40191	0.33828	0.24722	0.12498	-0.01816
474.425	0.19009	0.26775	0.35938	0.41166	0.43754	0.43439	0.40219	0.33858	0.24748	0.12513	-0.01816
474.635	0.18859	0.26689	0.35892	0.41151	0.43763	0.43461	0.40246	0.33889	0.24773	0.12529	-0.01816
474.845	0.1871	0.26604	0.35847	0.41136	0.43772	0.43482	0.40274	0.33919	0.24799	0.12544	-0.01816
475.055	0.1856	0.2652	0.35802	0.41122	0.43781	0.43504	0.40302	0.33949	0.24825	0.12559	-0.01816
475.265	0.18412	0.26435	0.35758	0.41107	0.43791	0.43526	0.4033	0.33979	0.24851	0.12575	-0.01817
475.475	0.18264	0.26352	0.35714	0.41094	0.43801	0.43548	0.40358	0.34009	0.24877	0.1259	-0.01817
475.685	0.18116	0.26268	0.35671	0.4108	0.43811	0.43571	0.40386	0.3404	0.24903	0.12605	-0.01818
475.895	0.17969	0.26185	0.35628	0.41067	0.43822	0.43594	0.40415	0.34071	0.24929	0.1262	-0.01819
476.105	0.17823	0.26103	0.35586	0.41054	0.43833	0.43618	0.40444	0.34102	0.24955	0.12635	-0.01819
476.315	0.17677	0.26022	0.35545	0.41042	0.43845	0.43642	0.40474	0.34133	0.24982	0.12651	-0.0182
476.525	0.17533	0.25941	0.35504	0.41031	0.43857	0.43667	0.40504	0.34165	0.25009	0.12666	-0.01821
476.735	0.17388	0.25861	0.35464	0.4102	0.4387	0.43693	0.40535	0.34197	0.25037	0.12682	-0.01821
476.945	0.17245	0.25781	0.35425	0.4101	0.43883	0.43719	0.40566	0.3423	0.25064	0.12698	-0.01822
477.155	0.17102	0.25702	0.35386	0.41	0.43897	0.43746	0.40598	0.34262	0.25092	0.12714	-0.01822
477.365	0.1696	0.25623	0.35348	0.40991	0.43911	0.43773	0.40631	0.34296	0.2512	0.1273	-0.01823
477.574	0.16818	0.25545	0.35311	0.40983	0.43926	0.43801	0.40664	0.34329	0.25149	0.12746	-0.01823
477.784	0.16678	0.25468	0.35274	0.40975	0.43942	0.43829	0.40697	0.34363	0.25178	0.12762	-0.01823
477.994	0.16538	0.25392	0.35238	0.40967	0.43958	0.43858	0.40731	0.34397	0.25207	0.12779	-0.01823
478.204	0.16398	0.25316	0.35202	0.40961	0.43975	0.43888	0.40765	0.34432	0.25237	0.12796	-0.01823
478.414	0.1626	0.25241	0.35168	0.40954	0.43992	0.43918	0.40801	0.34467	0.25266	0.12813	-0.01823
478.623	0.16122	0.25166	0.35133	0.40949	0.4401	0.43949	0.40836	0.34502	0.25297	0.1283	-0.01823
478.833	0.15985	0.25092	0.351	0.40944	0.44028	0.4398	0.40873	0.34538	0.25327	0.12847	-0.01823
479.043	0.15848	0.25019	0.35067	0.4094	0.44047	0.44012	0.40909	0.34574	0.25358	0.12865	-0.01823
479.253	0.15712	0.24946	0.35035	0.40936	0.44067	0.44045	0.40947	0.34611	0.25389	0.12883	-0.01822
479.462	0.15577	0.24875	0.35003	0.40934	0.44087	0.44079	0.40985	0.34648	0.2542	0.12901	-0.01822
479.672	0.15443	0.24803	0.34972	0.40932	0.44108	0.44113	0.41025	0.34686	0.25452	0.12919	-0.01821
479.882	0.15309	0.24733	0.34942	0.40931	0.4413	0.44148	0.41064	0.34724	0.25485	0.12938	-0.0182
480.091	0.15176	0.24664	0.34913	0.40931	0.44153	0.44184	0.41105	0.34763	0.25517	0.12956	-0.01819
480.301	0.15044	0.24595	0.34884	0.40931	0.44176	0.4422	0.41146	0.34803	0.2555	0.12975	-0.01818
480.51	0.14913	0.24526	0.34856	0.40932	0.442	0.44257	0.41188	0.34842	0.25584	0.12994	-0.01817
480.72	0.14782	0.24459	0.34829	0.40934	0.44224	0.44295	0.4123	0.34883	0.25617	0.13014	-0.01816
480.93	0.14652	0.24392	0.34802	0.40937	0.4425	0.44333	0.41274	0.34924	0.25651	0.13033	-0.01815
481.139	0.14523	0.24326	0.34777	0.4094	0.44275	0.44373	0.41318	0.34965	0.25686	0.13053	-0.01813
481.349	0.14394	0.2426	0.34751	0.40945	0.44302	0.44412	0.41362	0.35007	0.2572	0.13073	-0.01812
481.558	0.14267	0.24196	0.34727	0.4095	0.4433	0.44453	0.41407	0.3505	0.25756	0.13094	-0.0181
481.768	0.1414	0.24132	0.34703	0.40956	0.44358	0.44495	0.41454	0.35094	0.25791	0.13114	-0.01808
481.977	0.14014	0.24069	0.34681	0.40963	0.44387	0.44537	0.41501	0.35138	0.25827	0.13136	-0.01806
482.187	0.13889	0.24007	0.34659	0.40971	0.44417	0.4458	0.41548	0.35183	0.25864	0.13157	-0.01804
482.396	0.13765	0.23946	0.34638	0.4098	0.44448	0.44624	0.41597	0.35228	0.25901	0.13179	-0.01801
482.606	0.13642	0.23885	0.34618	0.40989	0.4448	0.44669	0.41646	0.35274	0.25939	0.13201	-0.01798
482.815	0.13519	0.23825	0.34598	0.41	0.44512	0.44715	0.41696	0.35321	0.25977	0.13224	-0.01796
483.024	0.13397	0.23766	0.3458	0.41012	0.44546	0.44761	0.41747	0.35368	0.26015	0.13247	-0.01793
483.234	0.13276	0.23708	0.34562	0.41024	0.4458	0.44809	0.41799	0.35417	0.26054	0.1327	-0.0179
483.443	0.13156	0.23651	0.34545	0.41038	0.44615	0.44857	0.41851	0.35465	0.26093	0.13293	-0.01786
483.653	0.13037	0.23594	0.34529	0.41052	0.44651	0.44906	0.41904	0.35515	0.26133	0.13317	-0.01783
483.862	0.12918	0.23538	0.34514	0.41067	0.44688	0.44956	0.41958	0.35565	0.26173	0.13341	-0.01779
484.071	0.128	0.23483	0.34499	0.41083	0.44725	0.45007	0.42013	0.35616	0.26213	0.13366	-0.01775
484.281	0.12683	0.23429	0.34485	0.411	0.44764	0.45058	0.42068	0.35668	0.26254	0.13391	-0.01771
484.49	0.12567	0.23376	0.34473	0.41118	0.44803	0.4511	0.42124	0.3572	0.26296	0.13416	-0.01767
484.699	0.12452	0.23323	0.34461	0.41137	0.44843	0.45163	0.42181	0.35773	0.26338	0.13442	-0.01763
484.908	0.12338	0.23271	0.3445	0.41157	0.44884	0.45217	0.42239	0.35827	0.2638	0.13468	-0.01758
485.118	0.12224	0.2322	0.3444	0.41177	0.44926	0.45271	0.42297	0.35881	0.26423	0.13494	-0.01754
485.327	0.12111	0.2317	0.34431	0.41199	0.44969	0.45327	0.42356	0.35936	0.26467	0.13521	-0.01749
485.536	0.11999	0.23121	0.34422	0.41222	0.45013	0.45383	0.42416	0.35992	0.26511	0.13548	-0.01744
485.745	0.11888	0.23073	0.34415	0.41245	0.45057	0.45439	0.42477	0.36048	0.26555	0.13576	-0.01738
485.954	0.11778	0.23025	0.34408	0.41269	0.45102	0.45497	0.42538	0.36106	0.26601	0.13604	-0.01733
486.163	0.11669	0.22978	0.34402	0.41295	0.45148	0.45555	0.426	0.36163	0.26646	0.13632	-0.01727
486.373	0.1156	0.22932	0.34397	0.41321	0.45195	0.45614	0.42662	0.36222	0.26692	0.13661	-0.01721
486.582	0.11453	0.22887	0.34393	0.41347	0.45243	0.45673	0.42725	0.36281	0.26738	0.1369	-0.01714
486.791	0.11346	0.22843	0.34389	0.41375	0.45291	0.45733	0.42789	0.3634	0.26785	0.1372	-0.01708
487	0.1124	0.22799	0.34387	0.41404	0.4534	0.45794	0.42854	0.36401	0.26833	0.1375	-0.01702
487.209	0.11134	0.22756	0.34385	0.41433	0.4539	0.45855	0.42918	0.36461	0.2688	0.1378	-0.01695
487.418	0.1103	0.22714	0.34383	0.41463	0.4544	0.45917	0.42984	0.36522	0.26928	0.13811	-0.01688
487.627	0.10926	0.22672	0.34383	0.41493	0.45491	0.45979	0.4305	0.36584	0.26976	0.13842	-0.01681
487.836	0.10822	0.22631	0.34382	0.41524	0.45543	0.46042	0.43116	0.36646	0.27025	0.13873	-0.01675
488.045	0.1072	0.22591	0.34383	0.41556	0.45594	0.46105	0.43183	0.36708	0.27074	0.13904	-0.01668
488.254	0.10618	0.22551	0.34384	0.41588	0.45647	0.46169	0.4325	0.36771	0.27123	0.13936	-0.01661
488.463	0.10516	0.22511	0.34385	0.41621	0.457	0.46232	0.43318	0.36834	0.27173	0.13967	-0.01654
488.672	0.10415	0.22472	0.34387	0.41654	0.45753	0.46297	0.43385	0.36897	0.27222	0.13999	-0.01647
488.881	0.10315	0.22434	0.3439	0.41688	0.45807	0.46361	0.43454	0.36961	0.27272	0.14031	-0.0164
489.09	0.10216	0.22397	0.34393	0.41723	0.45862	0.46427	0.43523	0.37025	0.27323	0.14064	-0.01632
489.299	0.10118	0.2236	0.34397	0.41758	0.45917	0.46492	0.43592	0.3709	0.27374	0.14096	-0.01625
489.508	0.1002	0.22323	0.34402	0.41794	0.45973	0.46558	0.43661	0.37155	0.27425	0.14129	-0.01618
489.716	0.09922	0.22288	0.34407	0.41831	0.46029	0.46625	0.43731	0.37221	0.27476	0.14163	-0.0161
489.925	0.09826	0.22252	0.34412	0.41867	0.46086	0.46692	0.43802	0.37286	0.27528	0.14196	-0.01603
490.134	0.0973	0.22218	0.34418	0.41905	0.46143	0.46759	0.43872	0.37353	0.2758	0.14229	-0.01595
490.343	0.09635	0.22184	0.34425	0.41943	0.46201	0.46826	0.43943	0.37419	0.27633	0.14263	-0.01588
490.552	0.0954	0.2215	0.34432	0.41981	0.46259	0.46894	0.44015	0.37486	0.27686	0.14297	-0.0158
490.761	0.09446	0.22118	0.3444	0.4202	0.46318	0.46963	0.44087	0.37553	0.27739	0.14332	-0.01572
490.969	0.09353	0.22086	0.34448	0.4206	0.46377	0.47032	0.44159	0.37621	0.27793	0.14366	-0.01564
491.178	0.0926	0.22054	0.34457	0.421	0.46437	0.47101	0.44232	0.37688	0.27847	0.14401	-0.01556
491.387	0.09168	0.22023	0.34466	0.42141	0.46497	0.47171	0.44304	0.37757	0.27901	0.14436	-0.01548
491.596	0.09077	0.21993	0.34476	0.42182	0.46558	0.47241	0.44378	0.37825	0.27956	0.14471	-0.0154
491.804	0.08986	0.21963	0.34487	0.42223	0.46619	0.47312	0.44451	0.37894	0.28011	0.14506	-0.01532
492.013	0.08896	0.21934	0.34498	0.42266	0.46681	0.47383	0.44525	0.37963	0.28066	0.14542	-0.01523
492.222	0.08807	0.21905	0.34509	0.42308	0.46743	0.47455	0.446	0.38032	0.28122	0.14578	-0.01515
492.43	0.08718	0.21877	0.34521	0.42351	0.46806	0.47527	0.44675	0.38102	0.28178	0.14614	-0.01506
492.639	0.0863	0.2185	0.34534	0.42395	0.46869	0.476	0.4475	0.38172	0.28235	0.1465	-0.01497
492.847	0.08542	0.21823	0.34547	0.4244	0.46933	0.47673	0.44826	0.38243	0.28292	0.14686	-0.01489
493.056	0.08455	0.21797	0.34561	0.42485	0.46997	0.47747	0.44902	0.38314	0.28349	0.14723	-0.0148
493.265	0.08369	0.21772	0.34575	0.4253	0.47062	0.47821	0.44979	0.38385	0.28407	0.1476	-0.01471
493.473	0.08283	0.21747	0.3459	0.42576	0.47128	0.47896	0.45057	0.38457	0.28465	0.14797	-0.01462
493.682	0.08198	0.21722	0.34606	0.42623	0.47194	0.47972	0.45134	0.38529	0.28524	0.14835	-0.01452
493.89	0.08114	0.21699	0.34622	0.42671	0.4726	0.48048	0.45213	0.38601	0.28583	0.14872	-0.01443
494.099	0.0803	0.21675	0.34638	0.42719	0.47327	0.48125	0.45292	0.38674	0.28642	0.1491	-0.01434
494.307	0.07946	0.21653	0.34655	0.42767	0.47395	0.48202	0.45371	0.38747	0.28702	0.14948	-0.01424
494.516	0.07864	0.21631	0.34673	0.42816	0.47464	0.4828	0.45451	0.38821	0.28762	0.14987	-0.01414
494.724	0.07782	0.21609	0.34691	0.42866	0.47533	0.48359	0.45531	0.38895	0.28823	0.15025	-0.01404
494.933	0.077	0.21589	0.3471	0.42917	0.47602	0.48438	0.45612	0.3897	0.28884	0.15064	-0.01394
495.141	0.0762	0.21569	0.3473	0.42968	0.47672	0.48518	0.45694	0.39045	0.28945	0.15104	-0.01384
495.349	0.0754	0.21549	0.3475	0.4302	0.47743	0.48599	0.45776	0.39121	0.29007	0.15143	-0.01374
495.558	0.0746	0.2153	0.34771	0.43072	0.47815	0.4868	0.45859	0.39197	0.29069	0.15182	-0.01364
495.766	0.07381	0.21511	0.34792	0.43125	0.47887	0.48762	0.45942	0.39273	0.29132	0.15222	-0.01353
495.975	0.07302	0.21493	0.34814	0.43179	0.47959	0.48845	0.46026	0.3935	0.29195	0.15262	-0.01343
496.183	0.07224	0.21476	0.34836	0.43233	0.48033	0.48928	0.4611	0.39427	0.29258	0.15302	-0.01333
496.391	0.07147	0.21459	0.34859	0.43287	0.48106	0.49012	0.46195	0.39505	0.29321	0.15342	-0.01322
496.6	0.07069	0.21442	0.34883	0.43343	0.48181	0.49096	0.4628	0.39583	0.29385	0.15382	-0.01312
496.808	0.06993	0.21426	0.34906	0.43398	0.48256	0.49182	0.46366	0.39661	0.2945	0.15423	-0.01302
497.016	0.06916	0.2141	0.34931	0.43455	0.48332	0.49267	0.46453	0.3974	0.29514	0.15463	-0.01291
497.224	0.06841	0.21395	0.34956	0.43511	0.48408	0.49353	0.4654	0.39819	0.29579	0.15504	-0.01281
497.433	0.06765	0.2138	0.34981	0.43569	0.48485	0.4944	0.46627	0.39898	0.29644	0.15544	-0.01271
497.641	0.0669	0.21365	0.35007	0.43626	0.48562	0.49528	0.46715	0.39978	0.29709	0.15585	-0.01261
497.849	0.06615	0.21351	0.35033	0.43684	0.4864	0.49615	0.46803	0.40058	0.29774	0.15626	-0.01251
498.057	0.06541	0.21337	0.35059	0.43743	0.48718	0.49704	0.46892	0.40138	0.2984	0.15667	-0.01241
498.265	0.06467	0.21324	0.35086	0.43802	0.48797	0.49792	0.46981	0.40219	0.29906	0.15708	-0.01231
498.474	0.06393	0.2131	0.35114	0.43861	0.48876	0.49882	0.47071	0.40299	0.29972	0.15748	-0.01221
498.682	0.0632	0.21297	0.35142	0.43921	0.48956	0.49972	0.47161	0.4038	0.30038	0.15789	-0.01211
498.89	0.06247	0.21285	0.3517	0.43981	0.49036	0.50062	0.47251	0.40462	0.30104	0.1583	-0.01201
499.098	0.06174	0.21272	0.35198	0.44041	0.49116	0.50152	0.47342	0.40543	0.3017	0.15871	-0.01192
499.306	0.06102	0.2126	0.35227	0.44102	0.49197	0.50243	0.47433	0.40625	0.30237	0.15912	-0.01182
499.514	0.06029	0.21248	0.35256	0.44163	0.49278	0.50334	0.47524	0.40707	0.30303	0.15952	-0.01173
499.722	0.05958	0.21237	0.35286	0.44224	0.4936	0.50426	0.47616	0.40789	0.3037	0.15993	-0.01164
499.93	0.05886	0.21225	0.35316	0.44285	0.49442	0.50518	0.47708	0.40871	0.30437	0.16034	-0.01154
500.138	0.05815	0.21214	0.35346	0.44347	0.49524	0.5061	0.478	0.40954	0.30503	0.16075	-0.01145
500.346	0.05744	0.21203	0.35376	0.44409	0.49607	0.50703	0.47893	0.41037	0.3057	0.16116	-0.01136
500.554	0.05674	0.21193	0.35407	0.44472	0.4969	0.50796	0.47986	0.4112	0.30637	0.16157	-0.01127
500.762	0.05604	0.21183	0.35438	0.44534	0.49773	0.50889	0.48079	0.41203	0.30705	0.16198	-0.01118
500.97	0.05534	0.21173	0.3547	0.44597	0.49857	0.50983	0.48172	0.41286	0.30772	0.16239	-0.01109
501.178	0.05465	0.21164	0.35502	0.4466	0.49941	0.51076	0.48266	0.4137	0.30839	0.1628	-0.011
501.386	0.05396	0.21155	0.35534	0.44724	0.50025	0.51171	0.4836	0.41454	0.30907	0.16321	-0.01091
501.594	0.05328	0.21146	0.35567	0.44788	0.5011	0.51265	0.48455	0.41538	0.30974	0.16363	-0.01082
501.802	0.0526	0.21137	0.356	0.44852	0.50195	0.5136	0.4855	0.41622	0.31042	0.16404	-0.01073
502.01	0.05193	0.21129	0.35634	0.44916	0.50281	0.51455	0.48645	0.41707	0.3111	0.16446	-0.01063
502.218	0.05125	0.21121	0.35668	0.44981	0.50367	0.5155	0.4874	0.41792	0.31179	0.16488	-0.01054
502.425	0.05059	0.21114	0.35702	0.45046	0.50453	0.51646	0.48836	0.41877	0.31247	0.16529	-0.01045
502.633	0.04992	0.21107	0.35737	0.45111	0.5054	0.51742	0.48932	0.41963	0.31315	0.16571	-0.01036
502.841	0.04927	0.211	0.35772	0.45177	0.50628	0.51838	0.49029	0.42048	0.31384	0.16614	-0.01027
503.049	0.04861	0.21094	0.35807	0.45243	0.50715	0.51935	0.49126	0.42134	0.31453	0.16656	-0.01018
503.257	0.04796	0.21088	0.35843	0.4531	0.50804	0.52032	0.49223	0.42221	0.31522	0.16698	-0.01008
503.464	0.04732	0.21082	0.35879	0.45377	0.50892	0.5213	0.49321	0.42308	0.31591	0.16741	-0.00999
503.672	0.04668	0.21077	0.35916	0.45444	0.50981	0.52227	0.49419	0.42395	0.31661	0.16784	-0.0099
503.88	0.04604	0.21073	0.35954	0.45512	0.51071	0.52325	0.49517	0.42482	0.31731	0.16827	-0.0098
504.088	0.04541	0.21068	0.35991	0.4558	0.51161	0.52424	0.49616	0.4257	0.31801	0.1687	-0.0097
504.295	0.04479	0.21065	0.36029	0.45649	0.51251	0.52523	0.49715	0.42658	0.31871	0.16913	-0.0096
504.503	0.04417	0.21061	0.36068	0.45718	0.51342	0.52622	0.49815	0.42746	0.31942	0.16957	-0.00951
504.711	0.04355	0.21058	0.36107	0.45787	0.51432	0.52721	0.49914	0.42834	0.32012	0.17001	-0.00941
504.918	0.04294	0.21056	0.36146	0.45857	0.51524	0.52821	0.50014	0.42923	0.32083	0.17045	-0.00931
505.126	0.04234	0.21053	0.36185	0.45927	0.51615	0.5292	0.50114	0.43012	0.32154	0.17089	-0.00921
505.333	0.04173	0.21052	0.36225	0.45997	0.51707	0.5302	0.50214	0.43101	0.32225	0.17133	-0.0091
505.541	0.04114	0.2105	0.36265	0.46067	0.51799	0.53121	0.50315	0.43191	0.32297	0.17178	-0.009
505.749	0.04054	0.21049	0.36306	0.46138	0.51891	0.53221	0.50416	0.4328	0.32369	0.17222	-0.00889
505.956	0.03996	0.21049	0.36347	0.46209	0.51984	0.53322	0.50517	0.4337	0.3244	0.17267	-0.00879
506.164	0.03937	0.21049	0.36388	0.46281	0.52076	0.53423	0.50618	0.4346	0.32512	0.17312	-0.00868
506.371	0.0388	0.21049	0.3643	0.46353	0.52169	0.53524	0.50719	0.43551	0.32585	0.17357	-0.00857
506.579	0.03822	0.2105	0.36472	0.46425	0.52263	0.53626	0.50821	0.43641	0.32657	0.17402	-0.00846
506.786	0.03765	0.21051	0.36514	0.46498	0.52357	0.53728	0.50923	0.43732	0.3273	0.17448	-0.00835
506.994	0.03709	0.21053	0.36557	0.46571	0.52451	0.5383	0.51025	0.43824	0.32803	0.17494	-0.00823
507.201	0.03653	0.21055	0.366	0.46644	0.52545	0.53933	0.51127	0.43915	0.32877	0.1754	-0.00811
507.409	0.03598	0.21057	0.36644	0.46718	0.5264	0.54036	0.5123	0.44007	0.32951	0.17586	-0.008
507.616	0.03543	0.2106	0.36688	0.46792	0.52735	0.54139	0.51333	0.44099	0.33025	0.17633	-0.00788
507.823	0.03489	0.21064	0.36733	0.46866	0.5283	0.54243	0.51436	0.44192	0.33099	0.17679	-0.00776
508.031	0.03435	0.21068	0.36778	0.46941	0.52926	0.54347	0.5154	0.44285	0.33174	0.17726	-0.00763
508.238	0.03382	0.21072	0.36823	0.47016	0.53022	0.54451	0.51644	0.44378	0.33249	0.17774	-0.0075
508.445	0.0333	0.21078	0.36869	0.47092	0.53118	0.54556	0.51748	0.44471	0.33324	0.17821	-0.00738
508.653	0.03278	0.21083	0.36915	0.47168	0.53215	0.54661	0.51853	0.44565	0.334	0.17869	-0.00724
508.86	0.03227	0.21089	0.36962	0.47245	0.53312	0.54767	0.51957	0.4466	0.33476	0.17917	-0.00711
509.067	0.03176	0.21096	0.3701	0.47322	0.5341	0.54873	0.52063	0.44754	0.33552	0.17966	-0.00697
509.275	0.03126	0.21104	0.37058	0.474	0.53508	0.54979	0.52168	0.4485	0.33629	0.18015	-0.00683
509.482	0.03076	0.21112	0.37107	0.47478	0.53607	0.55087	0.52275	0.44945	0.33707	0.18064	-0.00668
509.689	0.03028	0.2112	0.37156	0.47557	0.53706	0.55194	0.52381	0.45042	0.33785	0.18114	-0.00654
509.896	0.02979	0.21129	0.37206	0.47636	0.53805	0.55302	0.52488	0.45138	0.33863	0.18164	-0.00639
510.104	0.02931	0.21139	0.37256	0.47716	0.53905	0.55411	0.52596	0.45235	0.33942	0.18214	-0.00624
510.311	0.02884	0.21149	0.37307	0.47796	0.54006	0.5552	0.52703	0.45333	0.34021	0.18265	-0.00608
510.518	0.02838	0.2116	0.37359	0.47877	0.54107	0.5563	0.52812	0.45431	0.341	0.18316	-0.00592
510.725	0.02792	0.21171	0.37411	0.47959	0.54209	0.5574	0.52921	0.4553	0.3418	0.18367	-0.00576
510.932	0.02746	0.21183	0.37464	0.48041	0.54311	0.55851	0.5303	0.45629	0.34261	0.18419	-0.0056
511.14	0.02701	0.21196	0.37517	0.48124	0.54414	0.55963	0.5314	0.45728	0.34342	0.18471	-0.00543
511.347	0.02657	0.21209	0.37571	0.48207	0.54518	0.56075	0.53251	0.45828	0.34423	0.18523	-0.00527
511.554	0.02612	0.21222	0.37626	0.48291	0.54622	0.56188	0.53362	0.45929	0.34505	0.18576	-0.0051
511.761	0.02569	0.21236	0.37681	0.48376	0.54727	0.56302	0.53473	0.4603	0.34587	0.18629	-0.00493
511.968	0.02525	0.2125	0.37737	0.48462	0.54832	0.56416	0.53585	0.46132	0.34669	0.18681	-0.00476
512.175	0.02482	0.21265	0.37793	0.48547	0.54939	0.56531	0.53698	0.46234	0.34752	0.18735	-0.00459
512.382	0.0244	0.2128	0.3785	0.48634	0.55045	0.56646	0.53811	0.46337	0.34835	0.18788	-0.00441
512.589	0.02398	0.21295	0.37907	0.48721	0.55153	0.56762	0.53925	0.4644	0.34919	0.18842	-0.00424
512.796	0.02356	0.21311	0.37965	0.48809	0.55261	0.56879	0.54039	0.46543	0.35003	0.18896	-0.00406
513.003	0.02315	0.21328	0.38023	0.48897	0.55369	0.56996	0.54154	0.46647	0.35087	0.1895	-0.00388
513.21	0.02274	0.21345	0.38082	0.48986	0.55478	0.57114	0.54269	0.46752	0.35172	0.19004	-0.0037
513.417	0.02234	0.21362	0.38142	0.49076	0.55588	0.57232	0.54385	0.46857	0.35257	0.19059	-0.00352
513.624	0.02194	0.2138	0.38202	0.49166	0.55698	0.57351	0.54501	0.46962	0.35342	0.19113	-0.00334
513.831	0.02154	0.21398	0.38262	0.49257	0.55809	0.5747	0.54618	0.47068	0.35428	0.19168	-0.00315
514.038	0.02115	0.21416	0.38323	0.49348	0.5592	0.5759	0.54735	0.47174	0.35514	0.19224	-0.00297
514.245	0.02076	0.21435	0.38385	0.49439	0.56032	0.57711	0.54853	0.47281	0.356	0.19279	-0.00278
514.451	0.02037	0.21454	0.38447	0.49531	0.56144	0.57832	0.54971	0.47388	0.35687	0.19334	-0.0026
514.658	0.01999	0.21473	0.38509	0.49624	0.56257	0.57953	0.5509	0.47495	0.35774	0.1939	-0.00241
514.865	0.01961	0.21493	0.38572	0.49717	0.5637	0.58074	0.55209	0.47602	0.35861	0.19446	-0.00222
515.072	0.01923	0.21513	0.38635	0.4981	0.56484	0.58196	0.55328	0.4771	0.35948	0.19502	-0.00203
515.279	0.01886	0.21533	0.38698	0.49903	0.56598	0.58319	0.55448	0.47818	0.36036	0.19558	-0.00184
515.485	0.01848	0.21553	0.38762	0.49997	0.56712	0.58441	0.55568	0.47927	0.36124	0.19614	-0.00165
515.692	0.01811	0.21574	0.38826	0.50092	0.56827	0.58564	0.55689	0.48035	0.36211	0.1967	-0.00146
515.899	0.01774	0.21594	0.3889	0.50186	0.56942	0.58688	0.5581	0.48144	0.36299	0.19726	-0.00127
516.106	0.01738	0.21615	0.38955	0.50281	0.57057	0.58811	0.55931	0.48253	0.36388	0.19783	-0.00108
516.312	0.01701	0.21637	0.39019	0.50376	0.57173	0.58935	0.56052	0.48362	0.36476	0.19839	-0.000894672
516.519	0.01665	0.21658	0.39084	0.50472	0.57289	0.59059	0.56174	0.48471	0.36564	0.19896	-0.000704833
516.726	0.01629	0.21679	0.3915	0.50568	0.57405	0.59183	0.56296	0.48581	0.36653	0.19952	-0.000514469
516.932	0.01593	0.21701	0.39215	0.50664	0.57522	0.59308	0.56418	0.4869	0.36742	0.20009	-0.000323855
517.139	0.01558	0.21723	0.39281	0.5076	0.57639	0.59433	0.56541	0.488	0.36831	0.20066	-0.000133137
517.346	0.01522	0.21745	0.39347	0.50857	0.57756	0.59558	0.56664	0.4891	0.3692	0.20123	5.78324e-05
517.552	0.01487	0.21768	0.39414	0.50954	0.57874	0.59683	0.56787	0.49021	0.37009	0.2018	0.000249284
517.759	0.01452	0.2179	0.3948	0.51052	0.57992	0.59809	0.56911	0.49131	0.37098	0.20237	0.000441277
517.965	0.01418	0.21813	0.39547	0.51149	0.5811	0.59935	0.57035	0.49242	0.37188	0.20294	0.000633954
518.172	0.01383	0.21836	0.39614	0.51247	0.58229	0.60061	0.5716	0.49353	0.37278	0.20352	0.000827553
518.379	0.01349	0.21859	0.39682	0.51346	0.58348	0.60188	0.57285	0.49465	0.37368	0.20409	0.00102
518.585	0.01316	0.21883	0.39749	0.51445	0.58467	0.60315	0.5741	0.49577	0.37458	0.20467	0.00122
518.792	0.01282	0.21907	0.39818	0.51544	0.58587	0.60442	0.57535	0.49689	0.37549	0.20525	0.00142
518.998	0.01249	0.21931	0.39886	0.51644	0.58707	0.6057	0.57661	0.49801	0.3764	0.20584	0.00162
519.205	0.01217	0.21955	0.39955	0.51744	0.58828	0.60698	0.57788	0.49914	0.37731	0.20642	0.00182
519.411	0.01184	0.2198	0.40024	0.51844	0.58949	0.60826	0.57915	0.50027	0.37822	0.20701	0.00202
519.618	0.01153	0.22005	0.40094	0.51945	0.59071	0.60955	0.58042	0.50141	0.37914	0.2076	0.00223
519.824	0.01121	0.22031	0.40164	0.52046	0.59193	0.61084	0.5817	0.50255	0.38006	0.2082	0.00244
520.03	0.0109	0.22056	0.40234	0.52148	0.59315	0.61214	0.58299	0.50369	0.38098	0.2088	0.00265
520.237	0.01059	0.22083	0.40305	0.5225	0.59438	0.61344	0.58427	0.50484	0.38191	0.2094	0.00286
520.443	0.01029	0.22109	0.40376	0.52352	0.59561	0.61474	0.58557	0.50599	0.38284	0.21	0.00307
520.649	0.00999	0.22136	0.40448	0.52455	0.59685	0.61605	0.58686	0.50714	0.38377	0.21061	0.00329
520.856	0.0097	0.22163	0.4052	0.52558	0.59809	0.61737	0.58816	0.5083	0.3847	0.21122	0.00351
521.062	0.0094	0.22191	0.40592	0.52662	0.59934	0.61868	0.58947	0.50946	0.38564	0.21183	0.00373
521.268	0.00912	0.22219	0.40664	0.52766	0.60059	0.62	0.59078	0.51062	0.38658	0.21244	0.00396
521.475	0.00883	0.22247	0.40737	0.52871	0.60184	0.62132	0.59209	0.51179	0.38753	0.21306	0.00418
521.681	0.00855	0.22275	0.4081	0.52975	0.60309	0.62265	0.5934	0.51296	0.38847	0.21368	0.00441
521.887	0.00827	0.22304	0.40883	0.5308	0.60435	0.62398	0.59472	0.51413	0.38942	0.2143	0.00464
522.094	0.008	0.22333	0.40957	0.53185	0.60561	0.62531	0.59604	0.51531	0.39037	0.21492	0.00487
522.3	0.00773	0.22363	0.41031	0.53291	0.60687	0.62664	0.59736	0.51649	0.39133	0.21555	0.00511
522.506	0.00746	0.22393	0.41105	0.53397	0.60814	0.62798	0.59869	0.51767	0.39228	0.21618	0.00535
522.712	0.0072	0.22423	0.4118	0.53503	0.60941	0.62932	0.60002	0.51885	0.39324	0.21681	0.00559
522.918	0.00694	0.22453	0.41254	0.53609	0.61067	0.63066	0.60135	0.52004	0.3942	0.21744	0.00583
523.124	0.00668	0.22484	0.41329	0.53716	0.61195	0.63201	0.60268	0.52123	0.39517	0.21808	0.00607
523.331	0.00643	0.22515	0.41405	0.53823	0.61322	0.63335	0.60401	0.52242	0.39613	0.21872	0.00631
523.537	0.00618	0.22546	0.4148	0.53929	0.61449	0.6347	0.60534	0.52361	0.3971	0.21936	0.00656
523.743	0.00593	0.22577	0.41555	0.54036	0.61576	0.63605	0.60668	0.5248	0.39806	0.22	0.00681
523.949	0.00568	0.22608	0.41631	0.54143	0.61703	0.63739	0.60801	0.52599	0.39903	0.22064	0.00706
524.155	0.00544	0.2264	0.41706	0.5425	0.6183	0.63874	0.60934	0.52718	0.4	0.22128	0.00731
524.361	0.0052	0.22672	0.41782	0.54356	0.61957	0.64008	0.61067	0.52837	0.40096	0.22192	0.00756
524.567	0.00495	0.22703	0.41858	0.54463	0.62084	0.64142	0.61199	0.52956	0.40193	0.22256	0.00781
524.773	0.00471	0.22735	0.41933	0.54569	0.6221	0.64276	0.61332	0.53074	0.4029	0.22321	0.00806
524.979	0.00448	0.22767	0.42009	0.54676	0.62337	0.6441	0.61464	0.53193	0.40386	0.22385	0.00831
525.185	0.00424	0.22799	0.42085	0.54782	0.62463	0.64544	0.61596	0.53312	0.40483	0.22449	0.00857
525.391	0.00401	0.22831	0.4216	0.54889	0.6259	0.64678	0.61728	0.53431	0.4058	0.22513	0.00882
525.597	0.00377	0.22863	0.42236	0.54995	0.62716	0.64812	0.6186	0.53549	0.40676	0.22578	0.00907
525.803	0.00354	0.22896	0.42312	0.55101	0.62842	0.64945	0.61992	0.53668	0.40773	0.22642	0.00933
526.009	0.00331	0.22928	0.42388	0.55207	0.62968	0.65079	0.62124	0.53786	0.40869	0.22706	0.00958
526.215	0.00308	0.2296	0.42464	0.55313	0.63094	0.65212	0.62255	0.53905	0.40966	0.22771	0.00984
526.421	0.00286	0.22993	0.4254	0.55419	0.63219	0.65345	0.62386	0.54023	0.41062	0.22835	0.0101
526.627	0.00263	0.23026	0.42616	0.55525	0.63345	0.65479	0.62517	0.54142	0.41159	0.229	0.01035
526.832	0.00241	0.23058	0.42692	0.55631	0.63471	0.65612	0.62649	0.5426	0.41255	0.22964	0.01061
527.038	0.00219	0.23091	0.42768	0.55737	0.63596	0.65745	0.6278	0.54379	0.41352	0.23029	0.01087
527.244	0.00197	0.23124	0.42845	0.55843	0.63722	0.65878	0.6291	0.54497	0.41448	0.23094	0.01114
527.45	0.00175	0.23157	0.42921	0.55949	0.63847	0.66011	0.63041	0.54615	0.41545	0.23159	0.0114
527.656	0.00153	0.2319	0.42998	0.56055	0.63973	0.66144	0.63172	0.54734	0.41641	0.23223	0.01166
527.861	0.00132	0.23224	0.43075	0.56161	0.64098	0.66277	0.63303	0.54852	0.41738	0.23288	0.01193
528.067	0.00111	0.23257	0.43152	0.56267	0.64224	0.6641	0.63433	0.5497	0.41834	0.23353	0.01219
528.273	0.00089675	0.23291	0.43229	0.56373	0.64349	0.66543	0.63563	0.55089	0.41931	0.23418	0.01246
528.479	0.000686531	0.23324	0.43305	0.56479	0.64474	0.66675	0.63694	0.55207	0.42027	0.23483	0.01272
528.684	0.000477257	0.23358	0.43383	0.56585	0.64599	0.66808	0.63824	0.55325	0.42124	0.23548	0.01299
528.89	0.000268843	0.23391	0.4346	0.56691	0.64725	0.66941	0.63954	0.55443	0.4222	0.23613	0.01326
529.096	6.12242e-05	0.23425	0.43537	0.56797	0.6485	0.67074	0.64084	0.55562	0.42317	0.23678	0.01352
529.301	-0.000145691	0.23458	0.43614	0.56903	0.64975	0.67206	0.64214	0.5568	0.42413	0.23743	0.01379
529.507	-0.00035204	0.23492	0.43691	0.5701	0.651	0.67339	0.64344	0.55798	0.42509	0.23808	0.01406
529.713	-0.000557877	0.23526	0.43769	0.57116	0.65226	0.67472	0.64474	0.55916	0.42606	0.23873	0.01433
529.918	-0.000763005	0.2356	0.43846	0.57222	0.65351	0.67605	0.64603	0.56034	0.42702	0.23938	0.01459
530.124	-0.000967379	0.23593	0.43923	0.57328	0.65476	0.67737	0.64733	0.56152	0.42798	0.24003	0.01486
530.329	-0.00117	0.23627	0.44001	0.57434	0.65601	0.6787	0.64863	0.5627	0.42895	0.24068	0.01513
530.535	-0.00137	0.23661	0.44078	0.57541	0.65727	0.68003	0.64993	0.56388	0.42991	0.24133	0.0154
530.741	-0.00158	0.23695	0.44156	0.57647	0.65852	0.68136	0.65123	0.56506	0.43088	0.24198	0.01567
530.946	-0.00178	0.23729	0.44234	0.57753	0.65977	0.68269	0.65253	0.56624	0.43184	0.24263	0.01594
531.152	-0.00198	0.23763	0.44311	0.5786	0.66103	0.68402	0.65382	0.56742	0.4328	0.24328	0.01621
531.357	-0.00218	0.23797	0.44389	0.57966	0.66228	0.68535	0.65512	0.5686	0.43377	0.24393	0.01648
531.562	-0.00238	0.23831	0.44467	0.58072	0.66353	0.68668	0.65642	0.56978	0.43473	0.24458	0.01676
531.768	-0.00258	0.23865	0.44545	0.58179	0.66478	0.688	0.65772	0.57096	0.4357	0.24523	0.01703
531.973	-0.00277	0.23899	0.44622	0.58285	0.66604	0.68933	0.65901	0.57214	0.43666	0.24588	0.0173
532.179	-0.00297	0.23933	0.447	0.58391	0.66729	0.69066	0.66031	0.57332	0.43762	0.24654	0.01758
532.384	-0.00317	0.23967	0.44778	0.58498	0.66854	0.69199	0.66161	0.5745	0.43859	0.24719	0.01785
532.59	-0.00336	0.24001	0.44856	0.58604	0.66979	0.69331	0.6629	0.57568	0.43955	0.24784	0.01813
532.795	-0.00356	0.24036	0.44933	0.5871	0.67104	0.69464	0.6642	0.57685	0.44051	0.24849	0.01841
533	-0.00375	0.2407	0.45011	0.58816	0.67229	0.69596	0.6655	0.57803	0.44148	0.24915	0.01868
533.206	-0.00395	0.24104	0.45089	0.58923	0.67354	0.69729	0.66679	0.5792	0.44244	0.2498	0.01896
533.411	-0.00414	0.24138	0.45167	0.59029	0.67479	0.69861	0.66809	0.58038	0.4434	0.25045	0.01924
533.616	-0.00434	0.24172	0.45244	0.59135	0.67604	0.69994	0.66938	0.58155	0.44437	0.25111	0.01952
533.822	-0.00453	0.24206	0.45322	0.59241	0.67729	0.70126	0.67068	0.58273	0.44533	0.25176	0.0198
534.027	-0.00472	0.2424	0.454	0.59347	0.67853	0.70259	0.67197	0.5839	0.44629	0.25241	0.02008
534.232	-0.00491	0.24274	0.45477	0.59453	0.67978	0.70391	0.67327	0.58507	0.44725	0.25307	0.02036
534.437	-0.00511	0.24308	0.45555	0.59559	0.68103	0.70523	0.67456	0.58625	0.44822	0.25372	0.02064
534.642	-0.0053	0.24342	0.45632	0.59665	0.68228	0.70655	0.67586	0.58742	0.44918	0.25438	0.02092
534.848	-0.00549	0.24376	0.45709	0.59771	0.68352	0.70787	0.67715	0.58859	0.45014	0.25503	0.02121
535.053	-0.00568	0.2441	0.45787	0.59877	0.68477	0.70919	0.67844	0.58976	0.4511	0.25569	0.02149
535.258	-0.00587	0.24444	0.45864	0.59983	0.68601	0.71051	0.67974	0.59093	0.45206	0.25634	0.02177
535.463	-0.00606	0.24478	0.45941	0.60089	0.68725	0.71183	0.68103	0.59209	0.45302	0.25699	0.02206
535.668	-0.00624	0.24512	0.46018	0.60195	0.6885	0.71314	0.68232	0.59326	0.45398	0.25765	0.02235
535.873	-0.00643	0.24546	0.46095	0.60301	0.68974	0.71446	0.68361	0.59443	0.45494	0.2583	0.02263
536.079	-0.00662	0.2458	0.46172	0.60406	0.69098	0.71577	0.6849	0.59559	0.4559	0.25896	0.02292
536.284	-0.0068	0.24614	0.46248	0.60512	0.69222	0.71708	0.68619	0.59675	0.45686	0.25961	0.02321
536.489	-0.00699	0.24647	0.46325	0.60617	0.69345	0.71839	0.68748	0.59792	0.45782	0.26027	0.0235
536.694	-0.00717	0.24681	0.46401	0.60723	0.69469	0.7197	0.68876	0.59908	0.45877	0.26092	0.02379
536.899	-0.00736	0.24715	0.46478	0.60828	0.69592	0.72101	0.69005	0.60024	0.45973	0.26158	0.02409
537.104	-0.00754	0.24749	0.46554	0.60933	0.69716	0.72232	0.69133	0.6014	0.46069	0.26223	0.02438
537.309	-0.00772	0.24782	0.4663	0.61039	0.69839	0.72362	0.69262	0.60256	0.46164	0.26289	0.02467
537.514	-0.0079	0.24816	0.46706	0.61144	0.69962	0.72493	0.6939	0.60371	0.4626	0.26355	0.02497
537.719	-0.00808	0.2485	0.46782	0.61248	0.70084	0.72623	0.69518	0.60487	0.46355	0.2642	0.02527
537.924	-0.00826	0.24883	0.46858	0.61353	0.70207	0.72752	0.69645	0.60602	0.46451	0.26486	0.02557
538.129	-0.00843	0.24917	0.46934	0.61458	0.70329	0.72882	0.69772	0.60717	0.46546	0.26552	0.02587
538.334	-0.00861	0.24951	0.47009	0.61562	0.70451	0.73011	0.699	0.60832	0.46641	0.26617	0.02618
538.538	-0.00878	0.24985	0.47084	0.61666	0.70573	0.7314	0.70026	0.60947	0.46736	0.26683	0.02649
538.743	-0.00895	0.25019	0.4716	0.6177	0.70694	0.73269	0.70153	0.61062	0.46831	0.26749	0.0268
538.948	-0.00912	0.25053	0.47235	0.61874	0.70815	0.73397	0.7028	0.61176	0.46926	0.26815	0.02711
539.153	-0.00928	0.25086	0.4731	0.61978	0.70936	0.73525	0.70406	0.61291	0.47021	0.26881	0.02742
539.358	-0.00945	0.2512	0.47385	0.62082	0.71057	0.73653	0.70532	0.61405	0.47116	0.26947	0.02774
539.563	-0.00961	0.25154	0.47459	0.62185	0.71178	0.73781	0.70658	0.61519	0.47211	0.27014	0.02806
539.767	-0.00977	0.25189	0.47534	0.62288	0.71298	0.73909	0.70783	0.61633	0.47306	0.2708	0.02838
539.972	-0.00993	0.25223	0.47609	0.62391	0.71418	0.74036	0.70908	0.61747	0.474	0.27146	0.0287
540.177	-0.01008	0.25257	0.47683	0.62494	0.71538	0.74163	0.71033	0.61861	0.47495	0.27213	0.02903
540.382	-0.01024	0.25291	0.47758	0.62597	0.71658	0.7429	0.71158	0.61974	0.4759	0.27279	0.02936
540.586	-0.01039	0.25326	0.47832	0.627	0.71777	0.74416	0.71283	0.62087	0.47685	0.27346	0.02969
540.791	-0.01054	0.2536	0.47906	0.62802	0.71896	0.74542	0.71407	0.62201	0.47779	0.27413	0.03002
540.996	-0.01068	0.25394	0.4798	0.62904	0.72015	0.74668	0.71531	0.62314	0.47874	0.2748	0.03036
541.201	-0.01083	0.25429	0.48054	0.63006	0.72134	0.74794	0.71655	0.62427	0.47968	0.27547	0.0307
541.405	-0.01097	0.25463	0.48128	0.63108	0.72252	0.74919	0.71778	0.62539	0.48062	0.27614	0.03105
541.61	-0.01111	0.25498	0.48202	0.63209	0.7237	0.75043	0.71901	0.62652	0.48157	0.27681	0.03139
541.814	-0.01125	0.25532	0.48275	0.6331	0.72487	0.75168	0.72023	0.62764	0.48251	0.27748	0.03174
542.019	-0.01139	0.25567	0.48349	0.63411	0.72604	0.75292	0.72146	0.62876	0.48345	0.27815	0.03209
542.224	-0.01152	0.25601	0.48422	0.63511	0.72721	0.75416	0.72268	0.62988	0.48438	0.27883	0.03245
542.428	-0.01166	0.25635	0.48495	0.63611	0.72838	0.75539	0.72389	0.63099	0.48532	0.2795	0.0328
542.633	-0.01179	0.25669	0.48567	0.63711	0.72954	0.75662	0.7251	0.6321	0.48625	0.28017	0.03316
542.837	-0.01192	0.25704	0.4864	0.63811	0.7307	0.75785	0.72631	0.63321	0.48718	0.28084	0.03352
543.042	-0.01206	0.25738	0.48712	0.6391	0.73185	0.75907	0.72751	0.63432	0.48811	0.28152	0.03388
543.246	-0.01219	0.25772	0.48784	0.64008	0.733	0.76028	0.72871	0.63542	0.48904	0.28219	0.03424
543.451	-0.01231	0.25806	0.48856	0.64106	0.73414	0.7615	0.72991	0.63652	0.48996	0.28286	0.0346
543.655	-0.01244	0.2584	0.48927	0.64204	0.73528	0.7627	0.7311	0.63762	0.49089	0.28353	0.03497
543.86	-0.01257	0.25873	0.48999	0.64302	0.73642	0.76391	0.73228	0.63871	0.49181	0.28421	0.03534
544.064	-0.01269	0.25907	0.4907	0.64399	0.73755	0.76511	0.73346	0.6398	0.49273	0.28488	0.03571
544.269	-0.01281	0.25941	0.49141	0.64496	0.73869	0.7663	0.73464	0.64089	0.49365	0.28556	0.03609
544.473	-0.01293	0.25975	0.49212	0.64593	0.73981	0.76749	0.73582	0.64198	0.49456	0.28623	0.03647
544.677	-0.01305	0.26009	0.49283	0.64689	0.74094	0.76869	0.73699	0.64306	0.49548	0.28691	0.03685
544.882	-0.01316	0.26043	0.49354	0.64785	0.74206	0.76987	0.73816	0.64415	0.4964	0.28758	0.03723
545.086	-0.01328	0.26077	0.49424	0.64881	0.74318	0.77106	0.73933	0.64523	0.49731	0.28826	0.03762
545.291	-0.01339	0.26111	0.49495	0.64976	0.7443	0.77224	0.7405	0.64631	0.49823	0.28894	0.03801
545.495	-0.0135	0.26145	0.49565	0.65072	0.74542	0.77342	0.74166	0.64739	0.49914	0.28962	0.0384
545.699	-0.01361	0.26179	0.49636	0.65167	0.74653	0.7746	0.74283	0.64846	0.50005	0.2903	0.03879
545.903	-0.01371	0.26213	0.49706	0.65262	0.74764	0.77578	0.74399	0.64954	0.50097	0.29099	0.03919
546.108	-0.01381	0.26247	0.49776	0.65357	0.74875	0.77695	0.74515	0.65061	0.50188	0.29167	0.03959
546.312	-0.01391	0.26281	0.49847	0.65451	0.74986	0.77812	0.74631	0.65169	0.5028	0.29236	0.04
546.516	-0.01401	0.26316	0.49917	0.65546	0.75097	0.77929	0.74746	0.65276	0.50371	0.29305	0.04041
546.72	-0.01411	0.2635	0.49987	0.6564	0.75207	0.78046	0.74862	0.65383	0.50462	0.29373	0.04082
546.925	-0.0142	0.26384	0.50057	0.65734	0.75318	0.78162	0.74977	0.6549	0.50553	0.29442	0.04123
547.129	-0.01429	0.26419	0.50127	0.65827	0.75427	0.78278	0.75092	0.65596	0.50644	0.29511	0.04165
547.333	-0.01439	0.26453	0.50196	0.6592	0.75537	0.78394	0.75206	0.65703	0.50735	0.2958	0.04207
547.537	-0.01448	0.26487	0.50266	0.66013	0.75646	0.78509	0.7532	0.65809	0.50826	0.29649	0.04249
547.741	-0.01457	0.26521	0.50335	0.66106	0.75755	0.78624	0.75434	0.65914	0.50917	0.29718	0.04291
547.945	-0.01465	0.26556	0.50404	0.66198	0.75863	0.78739	0.75548	0.6602	0.51007	0.29787	0.04333
548.15	-0.01474	0.2659	0.50473	0.66289	0.75971	0.78853	0.75661	0.66125	0.51097	0.29856	0.04376
548.354	-0.01483	0.26624	0.50542	0.66381	0.76078	0.78966	0.75774	0.6623	0.51187	0.29925	0.04419
548.558	-0.01491	0.26658	0.5061	0.66472	0.76186	0.79079	0.75887	0.66334	0.51278	0.29995	0.04462
548.762	-0.01499	0.26692	0.50678	0.66563	0.76292	0.79192	0.75999	0.66439	0.51367	0.30064	0.04505
548.966	-0.01508	0.26725	0.50746	0.66653	0.76399	0.79305	0.76111	0.66543	0.51457	0.30133	0.04549
549.17	-0.01516	0.26759	0.50814	0.66743	0.76505	0.79417	0.76223	0.66647	0.51547	0.30202	0.04593
549.374	-0.01523	0.26793	0.50882	0.66833	0.76611	0.79529	0.76335	0.66751	0.51637	0.30272	0.04637
549.578	-0.01531	0.26827	0.50949	0.66923	0.76716	0.7964	0.76446	0.66854	0.51726	0.30341	0.04682
549.782	-0.01539	0.2686	0.51017	0.67012	0.76821	0.79751	0.76557	0.66957	0.51816	0.30411	0.04726
549.986	-0.01546	0.26894	0.51084	0.67101	0.76926	0.79862	0.76667	0.6706	0.51905	0.3048	0.04771
550.19	-0.01554	0.26927	0.51151	0.67189	0.7703	0.79972	0.76778	0.67163	0.51994	0.3055	0.04816
550.394	-0.01561	0.26961	0.51217	0.67277	0.77133	0.80082	0.76888	0.67265	0.52083	0.30619	0.04861
550.598	-0.01568	0.26994	0.51283	0.67365	0.77237	0.80191	0.76997	0.67367	0.52172	0.30689	0.04907
550.801	-0.01575	0.27027	0.51349	0.67452	0.7734	0.803	0.77107	0.67469	0.5226	0.30759	0.04953
551.005	-0.01582	0.2706	0.51415	0.67539	0.77442	0.80408	0.77215	0.6757	0.52349	0.30828	0.04999
551.209	-0.01589	0.27093	0.51481	0.67626	0.77544	0.80516	0.77324	0.67671	0.52437	0.30898	0.05045
551.413	-0.01596	0.27126	0.51546	0.67712	0.77645	0.80624	0.77432	0.67772	0.52525	0.30967	0.05091
551.617	-0.01603	0.27159	0.5161	0.67797	0.77746	0.80731	0.77539	0.67872	0.52613	0.31036	0.05137
551.821	-0.0161	0.27191	0.51675	0.67883	0.77846	0.80837	0.77646	0.67972	0.527	0.31105	0.05184
552.024	-0.01617	0.27223	0.51739	0.67967	0.77946	0.80943	0.77753	0.68071	0.52787	0.31175	0.05231
552.228	-0.01624	0.27255	0.51802	0.68051	0.78045	0.81048	0.77859	0.6817	0.52874	0.31244	0.05277
552.432	-0.01631	0.27287	0.51865	0.68135	0.78143	0.81153	0.77964	0.68268	0.52961	0.31312	0.05324
552.636	-0.01638	0.27319	0.51928	0.68219	0.78241	0.81258	0.78069	0.68367	0.53047	0.31381	0.05371
552.839	-0.01645	0.2735	0.5199	0.68302	0.78339	0.81361	0.78174	0.68464	0.53134	0.3145	0.05419
553.043	-0.01651	0.27381	0.52052	0.68384	0.78435	0.81465	0.78278	0.68562	0.53219	0.31518	0.05466
553.247	-0.01658	0.27412	0.52114	0.68466	0.78532	0.81567	0.78381	0.68658	0.53305	0.31587	0.05514
553.45	-0.01665	0.27443	0.52175	0.68547	0.78627	0.8167	0.78484	0.68755	0.5339	0.31655	0.05562
553.654	-0.01672	0.27474	0.52236	0.68628	0.78722	0.81771	0.78586	0.68851	0.53475	0.31724	0.05609
553.858	-0.01678	0.27504	0.52296	0.68709	0.78817	0.81872	0.78688	0.68946	0.5356	0.31792	0.05658
554.061	-0.01685	0.27534	0.52356	0.68789	0.7891	0.81973	0.78789	0.69041	0.53645	0.3186	0.05706
554.265	-0.01691	0.27565	0.52415	0.68868	0.79004	0.82072	0.7889	0.69136	0.53729	0.31928	0.05754
554.469	-0.01698	0.27594	0.52474	0.68947	0.79096	0.82172	0.78989	0.6923	0.53812	0.31996	0.05803
554.672	-0.01704	0.27624	0.52533	0.69025	0.79188	0.8227	0.79089	0.69323	0.53896	0.32064	0.05852
554.876	-0.01711	0.27653	0.52591	0.69103	0.79279	0.82368	0.79187	0.69416	0.53979	0.32131	0.05901
555.079	-0.01717	0.27683	0.52648	0.6918	0.79369	0.82465	0.79285	0.69509	0.54062	0.32199	0.0595
555.283	-0.01724	0.27712	0.52705	0.69257	0.79459	0.82562	0.79382	0.69601	0.54144	0.32266	0.05999
555.486	-0.0173	0.2774	0.52762	0.69333	0.79548	0.82658	0.79479	0.69692	0.54226	0.32334	0.06049
555.69	-0.01736	0.27769	0.52818	0.69409	0.79637	0.82753	0.79575	0.69783	0.54308	0.32401	0.06099
555.893	-0.01743	0.27797	0.52874	0.69484	0.79725	0.82848	0.7967	0.69874	0.5439	0.32468	0.06149
556.097	-0.01749	0.27826	0.5293	0.69559	0.79812	0.82943	0.79765	0.69964	0.54471	0.32535	0.06199
556.3	-0.01755	0.27854	0.52985	0.69633	0.79899	0.83036	0.79859	0.70054	0.54552	0.32602	0.06249
556.503	-0.01761	0.27882	0.53039	0.69707	0.79985	0.83129	0.79952	0.70143	0.54632	0.32669	0.063
556.707	-0.01767	0.27909	0.53093	0.6978	0.8007	0.83222	0.80045	0.70231	0.54712	0.32736	0.0635
556.91	-0.01773	0.27936	0.53147	0.69852	0.80155	0.83314	0.80137	0.7032	0.54792	0.32802	0.06401
557.114	-0.01779	0.27964	0.532	0.69925	0.80239	0.83405	0.80229	0.70407	0.54872	0.32869	0.06452
557.317	-0.01785	0.27991	0.53253	0.69996	0.80323	0.83496	0.8032	0.70495	0.54951	0.32935	0.06504
557.52	-0.01791	0.28017	0.53305	0.70067	0.80406	0.83586	0.8041	0.70581	0.5503	0.33001	0.06555
557.724	-0.01796	0.28044	0.53357	0.70138	0.80488	0.83675	0.80499	0.70668	0.55108	0.33067	0.06606
557.927	-0.01802	0.2807	0.53409	0.70208	0.8057	0.83764	0.80589	0.70753	0.55187	0.33133	0.06658
558.13	-0.01808	0.28096	0.5346	0.70277	0.80651	0.83853	0.80677	0.70839	0.55264	0.33199	0.0671
558.333	-0.01814	0.28121	0.5351	0.70346	0.80732	0.8394	0.80765	0.70923	0.55342	0.33264	0.06762
558.537	-0.0182	0.28147	0.5356	0.70414	0.80811	0.84027	0.80852	0.71008	0.55419	0.3333	0.06814
558.74	-0.01826	0.28172	0.5361	0.70482	0.80891	0.84114	0.80939	0.71091	0.55496	0.33395	0.06866
558.943	-0.01832	0.28196	0.53659	0.70549	0.80969	0.842	0.81024	0.71174	0.55572	0.3346	0.06918
559.146	-0.01838	0.28221	0.53707	0.70616	0.81047	0.84285	0.8111	0.71257	0.55648	0.33524	0.06971
559.35	-0.01844	0.28245	0.53755	0.70681	0.81124	0.84369	0.81194	0.71339	0.55723	0.33588	0.07023
559.553	-0.0185	0.28268	0.53803	0.70746	0.812	0.84452	0.81277	0.7142	0.55798	0.33653	0.07075
559.756	-0.01857	0.28292	0.5385	0.70811	0.81276	0.84535	0.8136	0.715	0.55872	0.33716	0.07128
559.959	-0.01863	0.28315	0.53896	0.70874	0.8135	0.84617	0.81442	0.7158	0.55946	0.3378	0.0718
560.162	-0.01869	0.28337	0.53942	0.70937	0.81424	0.84698	0.81523	0.71659	0.56019	0.33843	0.07233
560.365	-0.01876	0.2836	0.53987	0.70999	0.81497	0.84778	0.81604	0.71738	0.56092	0.33906	0.07286
560.568	-0.01882	0.28382	0.54032	0.71061	0.81569	0.84858	0.81683	0.71816	0.56164	0.33969	0.07339
560.771	-0.01889	0.28403	0.54076	0.71122	0.81641	0.84936	0.81762	0.71893	0.56235	0.34032	0.07392
560.974	-0.01895	0.28424	0.54119	0.71182	0.81712	0.85014	0.8184	0.71969	0.56307	0.34094	0.07445
561.177	-0.01901	0.28445	0.54162	0.71241	0.81781	0.85091	0.81917	0.72045	0.56377	0.34156	0.07498
561.38	-0.01908	0.28466	0.54205	0.713	0.8185	0.85166	0.81993	0.7212	0.56447	0.34218	0.07551
561.583	-0.01914	0.28486	0.54246	0.71357	0.81918	0.85241	0.82068	0.72194	0.56517	0.34279	0.07604
561.786	-0.01921	0.28506	0.54288	0.71414	0.81986	0.85315	0.82143	0.72268	0.56586	0.34341	0.07658
561.989	-0.01927	0.28526	0.54328	0.71471	0.82052	0.85389	0.82216	0.72341	0.56655	0.34402	0.07711
562.192	-0.01934	0.28545	0.54369	0.71526	0.82118	0.85461	0.82289	0.72413	0.56723	0.34463	0.07765
562.395	-0.0194	0.28564	0.54408	0.71581	0.82183	0.85532	0.82361	0.72485	0.5679	0.34524	0.07819
562.598	-0.01946	0.28583	0.54447	0.71636	0.82247	0.85603	0.82432	0.72556	0.56857	0.34584	0.07873
562.801	-0.01953	0.28601	0.54486	0.71689	0.8231	0.85673	0.82502	0.72626	0.56924	0.34645	0.07927
563.004	-0.01959	0.28619	0.54524	0.71742	0.82373	0.85742	0.82572	0.72696	0.5699	0.34705	0.07982
563.207	-0.01965	0.28637	0.54562	0.71794	0.82435	0.8581	0.82641	0.72765	0.57056	0.34765	0.08036
563.41	-0.01971	0.28655	0.54599	0.71846	0.82496	0.85877	0.82709	0.72834	0.57122	0.34825	0.08091
563.612	-0.01977	0.28672	0.54636	0.71897	0.82556	0.85943	0.82777	0.72902	0.57186	0.34885	0.08146
563.815	-0.01983	0.28689	0.54672	0.71947	0.82616	0.86009	0.82844	0.72969	0.57251	0.34945	0.08201
564.018	-0.01988	0.28706	0.54708	0.71997	0.82675	0.86074	0.8291	0.73036	0.57315	0.35005	0.08257
564.221	-0.01994	0.28723	0.54744	0.72046	0.82733	0.86138	0.82976	0.73102	0.57379	0.35064	0.08312
564.424	-0.02	0.2874	0.54779	0.72095	0.82791	0.86202	0.83041	0.73168	0.57443	0.35124	0.08368
564.626	-0.02005	0.28756	0.54814	0.72143	0.82847	0.86265	0.83105	0.73233	0.57506	0.35183	0.08424
564.829	-0.0201	0.28772	0.54848	0.7219	0.82904	0.86327	0.83169	0.73298	0.57568	0.35243	0.08481
565.032	-0.02015	0.28788	0.54881	0.72237	0.82959	0.86388	0.83232	0.73362	0.57631	0.35302	0.08537
565.234	-0.0202	0.28804	0.54915	0.72283	0.83014	0.86448	0.83295	0.73425	0.57692	0.35361	0.08594
565.437	-0.02025	0.28819	0.54948	0.72328	0.83068	0.86508	0.83356	0.73488	0.57754	0.35421	0.08651
565.64	-0.0203	0.28835	0.5498	0.72373	0.83121	0.86567	0.83417	0.7355	0.57815	0.3548	0.08708
565.842	-0.02034	0.2885	0.55012	0.72418	0.83174	0.86625	0.83478	0.73612	0.57876	0.35539	0.08766
566.045	-0.02039	0.28865	0.55044	0.72461	0.83225	0.86682	0.83538	0.73673	0.57936	0.35598	0.08824
566.248	-0.02043	0.2888	0.55075	0.72504	0.83276	0.86738	0.83597	0.73734	0.57996	0.35656	0.08882
566.45	-0.02047	0.28894	0.55105	0.72546	0.83327	0.86794	0.83655	0.73794	0.58056	0.35715	0.0894
566.653	-0.02051	0.28909	0.55135	0.72588	0.83376	0.86848	0.83713	0.73853	0.58115	0.35774	0.08999
566.855	-0.02055	0.28923	0.55165	0.72629	0.83425	0.86902	0.8377	0.73912	0.58174	0.35833	0.09057
567.058	-0.02059	0.28937	0.55194	0.72669	0.83473	0.86955	0.83826	0.7397	0.58232	0.35891	0.09116
567.26	-0.02063	0.28951	0.55223	0.72709	0.8352	0.87008	0.83882	0.74027	0.5829	0.3595	0.09176
567.463	-0.02066	0.28965	0.55251	0.72748	0.83566	0.87059	0.83937	0.74084	0.58348	0.36008	0.09235
567.665	-0.02069	0.28978	0.55279	0.72787	0.83612	0.8711	0.83991	0.7414	0.58405	0.36067	0.09295
567.868	-0.02073	0.28992	0.55306	0.72824	0.83657	0.8716	0.84045	0.74196	0.58462	0.36125	0.09355
568.07	-0.02076	0.29005	0.55334	0.72862	0.83702	0.87209	0.84098	0.74251	0.58519	0.36183	0.09415
568.273	-0.02078	0.29018	0.5536	0.72898	0.83745	0.87258	0.8415	0.74306	0.58575	0.36242	0.09475
568.475	-0.02081	0.29031	0.55386	0.72934	0.83788	0.87306	0.84202	0.7436	0.58631	0.363	0.09536
568.678	-0.02084	0.29044	0.55412	0.7297	0.83831	0.87353	0.84253	0.74413	0.58686	0.36358	0.09597
568.88	-0.02087	0.29057	0.55437	0.73005	0.83872	0.87399	0.84304	0.74466	0.58741	0.36416	0.09658
569.082	-0.02089	0.29069	0.55462	0.73039	0.83913	0.87445	0.84354	0.74518	0.58796	0.36473	0.09719
569.285	-0.02092	0.29081	0.55486	0.73072	0.83953	0.8749	0.84403	0.74569	0.5885	0.36531	0.0978
569.487	-0.02094	0.29093	0.5551	0.73105	0.83992	0.87534	0.84451	0.7462	0.58904	0.36589	0.09842
569.689	-0.02096	0.29104	0.55533	0.73136	0.84031	0.87577	0.84498	0.7467	0.58957	0.36646	0.09903
569.892	-0.02099	0.29116	0.55555	0.73167	0.84068	0.87619	0.84545	0.7472	0.5901	0.36703	0.09965
570.094	-0.02101	0.29127	0.55577	0.73198	0.84105	0.8766	0.8459	0.74769	0.59062	0.3676	0.10027
570.296	-0.02103	0.29138	0.55599	0.73227	0.84141	0.87701	0.84635	0.74816	0.59114	0.36816	0.10089
570.499	-0.02106	0.29148	0.55619	0.73256	0.84176	0.8774	0.84679	0.74864	0.59165	0.36873	0.10151
570.701	-0.02108	0.29158	0.55639	0.73283	0.8421	0.87778	0.84722	0.7491	0.59216	0.36929	0.10213
570.903	-0.0211	0.29168	0.55659	0.7331	0.84243	0.87816	0.84764	0.74956	0.59266	0.36985	0.10275
571.105	-0.02113	0.29178	0.55678	0.73336	0.84275	0.87852	0.84805	0.75	0.59315	0.37041	0.10337
571.307	-0.02115	0.29187	0.55696	0.73361	0.84306	0.87887	0.84845	0.75044	0.59364	0.37096	0.104
571.51	-0.02117	0.29196	0.55714	0.73386	0.84337	0.87922	0.84884	0.75088	0.59413	0.37152	0.10462
571.712	-0.0212	0.29205	0.55731	0.73409	0.84366	0.87955	0.84923	0.7513	0.59461	0.37207	0.10525
571.914	-0.02122	0.29213	0.55747	0.73432	0.84395	0.87988	0.8496	0.75172	0.59508	0.37261	0.10587
572.116	-0.02124	0.29221	0.55763	0.73454	0.84422	0.8802	0.84997	0.75213	0.59555	0.37316	0.1065
572.318	-0.02126	0.29229	0.55779	0.73475	0.84449	0.8805	0.85032	0.75253	0.59602	0.37371	0.10713
572.52	-0.02129	0.29236	0.55794	0.73495	0.84475	0.8808	0.85067	0.75293	0.59648	0.37425	0.10776
572.722	-0.02131	0.29244	0.55808	0.73515	0.845	0.88109	0.85101	0.75332	0.59693	0.37479	0.10839
572.924	-0.02133	0.2925	0.55822	0.73533	0.84525	0.88137	0.85134	0.7537	0.59738	0.37532	0.10902
573.126	-0.02136	0.29257	0.55835	0.73551	0.84548	0.88164	0.85166	0.75408	0.59782	0.37586	0.10966
573.328	-0.02138	0.29263	0.55847	0.73568	0.8457	0.88189	0.85197	0.75444	0.59826	0.37639	0.11029
573.53	-0.0214	0.29269	0.55859	0.73584	0.84592	0.88214	0.85227	0.7548	0.5987	0.37692	0.11092
573.732	-0.02143	0.29274	0.5587	0.73599	0.84613	0.88238	0.85257	0.75516	0.59913	0.37745	0.11156
573.934	-0.02145	0.29279	0.55881	0.73614	0.84633	0.88261	0.85285	0.7555	0.59955	0.37797	0.11219
574.136	-0.02148	0.29284	0.55891	0.73627	0.84652	0.88284	0.85313	0.75584	0.59997	0.37849	0.11283
574.338	-0.02151	0.29288	0.559	0.7364	0.8467	0.88305	0.85339	0.75617	0.60038	0.37901	0.11346
574.54	-0.02154	0.29292	0.55909	0.73653	0.84687	0.88325	0.85365	0.75649	0.60078	0.37952	0.11409
574.742	-0.02157	0.29295	0.55917	0.73664	0.84704	0.88345	0.8539	0.75681	0.60119	0.38004	0.11473
574.944	-0.0216	0.29298	0.55924	0.73675	0.8472	0.88364	0.85414	0.75712	0.60158	0.38055	0.11536
575.146	-0.02163	0.29301	0.55931	0.73685	0.84735	0.88382	0.85438	0.75743	0.60198	0.38105	0.116
575.348	-0.02167	0.29303	0.55938	0.73694	0.84749	0.88399	0.85461	0.75773	0.60237	0.38156	0.11663
575.55	-0.0217	0.29305	0.55944	0.73703	0.84763	0.88415	0.85483	0.75802	0.60275	0.38206	0.11727
575.751	-0.02174	0.29307	0.55949	0.73711	0.84776	0.88431	0.85504	0.75831	0.60313	0.38256	0.1179
575.953	-0.02178	0.29308	0.55954	0.73718	0.84788	0.88446	0.85524	0.75859	0.60351	0.38306	0.11854
576.155	-0.02181	0.29308	0.55958	0.73724	0.848	0.88461	0.85544	0.75887	0.60388	0.38355	0.11917
576.357	-0.02185	0.29309	0.55962	0.7373	0.84811	0.88474	0.85563	0.75913	0.60424	0.38404	0.11981
576.558	-0.02189	0.29309	0.55965	0.73736	0.84821	0.88487	0.85582	0.7594	0.6046	0.38453	0.12044
576.76	-0.02193	0.29309	0.55967	0.7374	0.8483	0.88499	0.85599	0.75966	0.60496	0.38502	0.12108
576.962	-0.02197	0.29308	0.5597	0.73744	0.84839	0.88511	0.85616	0.75991	0.60532	0.3855	0.12172
577.164	-0.02201	0.29307	0.55971	0.73748	0.84847	0.88521	0.85633	0.76016	0.60567	0.38599	0.12235
577.365	-0.02205	0.29306	0.55972	0.73751	0.84854	0.88532	0.85648	0.7604	0.60601	0.38647	0.12299
577.567	-0.02209	0.29304	0.55973	0.73753	0.84861	0.88541	0.85664	0.76064	0.60636	0.38695	0.12363
577.769	-0.02213	0.29303	0.55973	0.73755	0.84867	0.8855	0.85678	0.76087	0.6067	0.38743	0.12427
577.97	-0.02218	0.29301	0.55973	0.73756	0.84872	0.88558	0.85692	0.7611	0.60703	0.38791	0.12492
578.172	-0.02222	0.29298	0.55972	0.73756	0.84877	0.88566	0.85705	0.76132	0.60737	0.38838	0.12556
578.373	-0.02226	0.29295	0.55971	0.73756	0.84881	0.88573	0.85717	0.76154	0.60769	0.38886	0.1262
578.575	-0.0223	0.29293	0.55969	0.73755	0.84884	0.88579	0.85729	0.76175	0.60802	0.38933	0.12685
578.777	-0.02234	0.29289	0.55967	0.73754	0.84887	0.88584	0.8574	0.76195	0.60834	0.3898	0.12749
578.978	-0.02238	0.29286	0.55964	0.73752	0.84889	0.88589	0.85751	0.76215	0.60866	0.39027	0.12814
579.18	-0.02242	0.29282	0.55961	0.7375	0.8489	0.88594	0.85761	0.76235	0.60897	0.39073	0.12878
579.381	-0.02246	0.29278	0.55958	0.73747	0.84891	0.88597	0.8577	0.76254	0.60928	0.3912	0.12943
579.583	-0.0225	0.29274	0.55954	0.73744	0.84891	0.88601	0.85779	0.76273	0.60959	0.39167	0.13008
579.784	-0.02254	0.29269	0.55949	0.7374	0.8489	0.88603	0.85788	0.76292	0.60989	0.39213	0.13073
579.986	-0.02258	0.29265	0.55945	0.73736	0.84889	0.88606	0.85796	0.7631	0.6102	0.39259	0.13138
580.187	-0.02262	0.2926	0.5594	0.73732	0.84888	0.88608	0.85804	0.76327	0.6105	0.39305	0.13203
580.389	-0.02265	0.29255	0.55934	0.73727	0.84886	0.88609	0.85811	0.76345	0.61079	0.39352	0.13268
580.59	-0.02269	0.2925	0.55929	0.73721	0.84884	0.8861	0.85818	0.76362	0.61109	0.39398	0.13333
580.791	-0.02273	0.29244	0.55922	0.73716	0.84881	0.88611	0.85825	0.76379	0.61139	0.39444	0.13399
580.993	-0.02277	0.29239	0.55916	0.7371	0.84878	0.88612	0.85831	0.76395	0.61168	0.3949	0.13464
581.194	-0.02281	0.29233	0.55909	0.73704	0.84874	0.88612	0.85837	0.76411	0.61197	0.39535	0.1353
581.395	-0.02284	0.29227	0.55902	0.73697	0.8487	0.88611	0.85843	0.76427	0.61226	0.39581	0.13596
581.597	-0.02288	0.29221	0.55895	0.7369	0.84866	0.88611	0.85849	0.76443	0.61254	0.39627	0.13662
581.798	-0.02291	0.29215	0.55888	0.73683	0.84861	0.8861	0.85854	0.76458	0.61283	0.39673	0.13728
581.999	-0.02295	0.29209	0.5588	0.73675	0.84855	0.88608	0.85859	0.76473	0.61311	0.39718	0.13794
582.201	-0.02298	0.29203	0.55872	0.73668	0.8485	0.88607	0.85863	0.76488	0.61339	0.39764	0.1386
582.402	-0.02301	0.29197	0.55864	0.73659	0.84843	0.88605	0.85868	0.76502	0.61367	0.3981	0.13927
582.603	-0.02304	0.2919	0.55855	0.73651	0.84837	0.88602	0.85872	0.76516	0.61395	0.39855	0.13993
582.804	-0.02307	0.29184	0.55846	0.73642	0.8483	0.886	0.85876	0.7653	0.61423	0.39901	0.1406
583.006	-0.02309	0.29178	0.55837	0.73633	0.84822	0.88597	0.85879	0.76544	0.61451	0.39947	0.14127
583.207	-0.02312	0.29171	0.55828	0.73624	0.84814	0.88593	0.85882	0.76557	0.61479	0.39993	0.14195
583.408	-0.02314	0.29165	0.55819	0.73614	0.84806	0.88589	0.85885	0.7657	0.61506	0.40038	0.14262
583.609	-0.02317	0.29158	0.55809	0.73604	0.84797	0.88585	0.85888	0.76583	0.61534	0.40084	0.1433
583.81	-0.02319	0.29152	0.55799	0.73594	0.84788	0.88581	0.8589	0.76595	0.61561	0.4013	0.14397
584.011	-0.02321	0.29145	0.55789	0.73584	0.84778	0.88576	0.85892	0.76608	0.61588	0.40176	0.14465
584.213	-0.02323	0.29139	0.55779	0.73573	0.84768	0.88571	0.85894	0.76619	0.61615	0.40221	0.14533
584.414	-0.02324	0.29132	0.55769	0.73562	0.84758	0.88565	0.85895	0.76631	0.61642	0.40267	0.14602
584.615	-0.02326	0.29125	0.55758	0.7355	0.84747	0.88559	0.85896	0.76642	0.61669	0.40313	0.1467
584.816	-0.02327	0.29119	0.55747	0.73538	0.84736	0.88553	0.85897	0.76653	0.61695	0.40358	0.14739
585.017	-0.02329	0.29112	0.55736	0.73526	0.84724	0.88546	0.85897	0.76664	0.61722	0.40404	0.14807
585.218	-0.0233	0.29105	0.55725	0.73514	0.84712	0.88539	0.85897	0.76675	0.61748	0.4045	0.14876
585.419	-0.02331	0.29098	0.55714	0.73501	0.84699	0.88532	0.85897	0.76685	0.61774	0.40495	0.14945
585.62	-0.02332	0.29091	0.55702	0.73488	0.84686	0.88524	0.85897	0.76695	0.618	0.40541	0.15014
585.821	-0.02333	0.29084	0.5569	0.73475	0.84673	0.88516	0.85896	0.76705	0.61826	0.40586	0.15083
586.022	-0.02334	0.29077	0.55678	0.73461	0.84659	0.88507	0.85895	0.76714	0.61851	0.40632	0.15153
586.223	-0.02335	0.2907	0.55665	0.73448	0.84645	0.88499	0.85893	0.76724	0.61877	0.40677	0.15222
586.424	-0.02336	0.29062	0.55653	0.73433	0.84631	0.88489	0.85892	0.76733	0.61902	0.40723	0.15291
586.625	-0.02336	0.29055	0.5564	0.73419	0.84616	0.8848	0.8589	0.76742	0.61928	0.40768	0.15361
586.826	-0.02337	0.29048	0.55627	0.73404	0.84601	0.8847	0.85887	0.7675	0.61953	0.40814	0.15431
587.026	-0.02338	0.2904	0.55614	0.73389	0.84586	0.88461	0.85885	0.76759	0.61978	0.40859	0.155
587.227	-0.02338	0.29032	0.55601	0.73374	0.8457	0.8845	0.85882	0.76767	0.62003	0.40904	0.1557
587.428	-0.02339	0.29025	0.55587	0.73359	0.84554	0.8844	0.85879	0.76775	0.62027	0.4095	0.1564
587.629	-0.02339	0.29017	0.55574	0.73343	0.84538	0.88429	0.85876	0.76783	0.62052	0.40995	0.1571
587.83	-0.0234	0.29009	0.5556	0.73327	0.84521	0.88418	0.85872	0.76791	0.62076	0.4104	0.1578
588.031	-0.0234	0.29001	0.55546	0.73311	0.84504	0.88406	0.85868	0.76799	0.621	0.41085	0.1585
588.231	-0.02341	0.28993	0.55532	0.73294	0.84487	0.88395	0.85864	0.76806	0.62124	0.4113	0.1592
588.432	-0.02341	0.28984	0.55517	0.73278	0.84469	0.88383	0.8586	0.76813	0.62148	0.41175	0.1599
588.633	-0.02342	0.28976	0.55503	0.73261	0.84452	0.88371	0.85855	0.76821	0.62172	0.4122	0.1606
588.834	-0.02342	0.28968	0.55488	0.73244	0.84434	0.88359	0.85851	0.76828	0.62196	0.41265	0.16131
589.034	-0.02342	0.28959	0.55473	0.73226	0.84416	0.88346	0.85846	0.76835	0.6222	0.4131	0.16201
589.235	-0.02343	0.28951	0.55458	0.73209	0.84397	0.88334	0.85841	0.76842	0.62244	0.41355	0.16272
589.436	-0.02343	0.28942	0.55443	0.73191	0.84379	0.88321	0.85835	0.76848	0.62267	0.414	0.16342
589.636	-0.02344	0.28933	0.55428	0.73173	0.8436	0.88308	0.8583	0.76855	0.62291	0.41445	0.16413
589.837	-0.02344	0.28925	0.55413	0.73155	0.84341	0.88295	0.85824	0.76861	0.62314	0.4149	0.16483
590.038	-0.02344	0.28916	0.55397	0.73137	0.84322	0.88281	0.85818	0.76868	0.62337	0.41535	0.16554
590.238	-0.02345	0.28907	0.55381	0.73119	0.84303	0.88268	0.85812	0.76874	0.6236	0.4158	0.16625
590.439	-0.02345	0.28897	0.55366	0.731	0.84283	0.88254	0.85806	0.7688	0.62383	0.41624	0.16695
590.639	-0.02346	0.28888	0.5535	0.73081	0.84264	0.8824	0.85799	0.76886	0.62406	0.41669	0.16766
590.84	-0.02346	0.28879	0.55334	0.73062	0.84244	0.88226	0.85793	0.76892	0.62429	0.41714	0.16837
591.04	-0.02347	0.28869	0.55318	0.73044	0.84225	0.88212	0.85787	0.76898	0.62452	0.41758	0.16907
591.241	-0.02348	0.2886	0.55302	0.73025	0.84205	0.88198	0.8578	0.76904	0.62475	0.41803	0.16978
591.441	-0.02348	0.2885	0.55286	0.73005	0.84185	0.88184	0.85773	0.7691	0.62498	0.41848	0.17048
591.642	-0.02349	0.2884	0.55269	0.72986	0.84165	0.88169	0.85767	0.76916	0.6252	0.41892	0.17119
591.842	-0.0235	0.2883	0.55253	0.72967	0.84146	0.88155	0.8576	0.76922	0.62543	0.41937	0.1719
592.043	-0.02351	0.2882	0.55236	0.72948	0.84126	0.88141	0.85753	0.76928	0.62566	0.41981	0.1726
592.243	-0.02352	0.28809	0.5522	0.72928	0.84105	0.88126	0.85746	0.76933	0.62588	0.42025	0.1733
592.444	-0.02353	0.28799	0.55203	0.72908	0.84085	0.88111	0.85739	0.76939	0.6261	0.4207	0.17401
592.644	-0.02354	0.28789	0.55186	0.72889	0.84065	0.88097	0.85731	0.76944	0.62632	0.42114	0.17471
592.845	-0.02355	0.28778	0.55169	0.72869	0.84044	0.88082	0.85724	0.7695	0.62655	0.42158	0.17541
593.045	-0.02357	0.28767	0.55152	0.72849	0.84024	0.88067	0.85716	0.76955	0.62677	0.42202	0.17611
593.245	-0.02358	0.28757	0.55135	0.72828	0.84003	0.88052	0.85709	0.76961	0.62699	0.42246	0.17681
593.446	-0.02359	0.28746	0.55118	0.72808	0.83983	0.88037	0.85701	0.76966	0.62721	0.4229	0.17752
593.646	-0.02361	0.28735	0.55101	0.72788	0.83962	0.88021	0.85693	0.76971	0.62743	0.42334	0.17822
593.846	-0.02362	0.28724	0.55084	0.72768	0.83941	0.88006	0.85685	0.76976	0.62764	0.42378	0.17892
594.047	-0.02363	0.28713	0.55066	0.72747	0.8392	0.87991	0.85678	0.76982	0.62786	0.42422	0.17962
594.247	-0.02364	0.28702	0.55049	0.72727	0.839	0.87976	0.8567	0.76987	0.62808	0.42466	0.18032
594.447	-0.02366	0.28691	0.55032	0.72706	0.83879	0.8796	0.85662	0.76992	0.6283	0.4251	0.18102
594.647	-0.02367	0.2868	0.55014	0.72685	0.83858	0.87945	0.85653	0.76997	0.62852	0.42554	0.18172
594.848	-0.02368	0.2867	0.54997	0.72665	0.83836	0.87929	0.85645	0.77002	0.62873	0.42598	0.18242
595.048	-0.02369	0.28659	0.54979	0.72644	0.83815	0.87913	0.85637	0.77007	0.62895	0.42642	0.18312
595.248	-0.0237	0.28648	0.54962	0.72623	0.83794	0.87897	0.85628	0.77012	0.62916	0.42686	0.18382
595.448	-0.02371	0.28637	0.54944	0.72601	0.83772	0.87881	0.85619	0.77017	0.62938	0.42729	0.18452
595.648	-0.02372	0.28626	0.54927	0.7258	0.8375	0.87864	0.8561	0.77021	0.62959	0.42773	0.18522
595.848	-0.02373	0.28614	0.54909	0.72558	0.83728	0.87847	0.85601	0.77026	0.6298	0.42817	0.18592
596.049	-0.02374	0.28603	0.54891	0.72537	0.83706	0.87831	0.85592	0.7703	0.63001	0.42861	0.18661
596.249	-0.02375	0.28592	0.54873	0.72515	0.83684	0.87814	0.85583	0.77035	0.63022	0.42904	0.18731
596.449	-0.02376	0.28581	0.54856	0.72494	0.83662	0.87797	0.85573	0.77039	0.63043	0.42948	0.18801
596.649	-0.02376	0.2857	0.54838	0.72472	0.8364	0.8778	0.85564	0.77044	0.63064	0.42992	0.1887
596.849	-0.02377	0.2856	0.5482	0.7245	0.83618	0.87762	0.85555	0.77048	0.63085	0.43036	0.1894
597.049	-0.02378	0.28549	0.54803	0.72429	0.83596	0.87745	0.85545	0.77053	0.63106	0.4308	0.19009
597.249	-0.02379	0.28538	0.54785	0.72407	0.83574	0.87728	0.85536	0.77057	0.63127	0.43124	0.19079
597.449	-0.02379	0.28527	0.54768	0.72386	0.83552	0.87711	0.85527	0.77062	0.63148	0.43167	0.19148
597.649	-0.0238	0.28516	0.5475	0.72364	0.83529	0.87694	0.85518	0.77067	0.63169	0.43211	0.19217
597.849	-0.02381	0.28506	0.54732	0.72342	0.83507	0.87676	0.85508	0.77071	0.6319	0.43255	0.19287
598.049	-0.02381	0.28495	0.54715	0.72321	0.83485	0.87659	0.85499	0.77076	0.63211	0.43299	0.19356
598.249	-0.02382	0.28484	0.54697	0.72299	0.83463	0.87642	0.8549	0.77081	0.63232	0.43343	0.19425
598.449	-0.02383	0.28474	0.5468	0.72278	0.83442	0.87625	0.85481	0.77086	0.63253	0.43387	0.19494
598.649	-0.02384	0.28463	0.54663	0.72257	0.8342	0.87608	0.85472	0.77091	0.63275	0.43431	0.19562
598.848	-0.02384	0.28452	0.54645	0.72235	0.83398	0.87591	0.85463	0.77096	0.63296	0.43474	0.19631
599.048	-0.02385	0.28442	0.54628	0.72214	0.83376	0.87574	0.85454	0.77101	0.63317	0.43518	0.197
599.248	-0.02386	0.28431	0.54611	0.72193	0.83354	0.87557	0.85445	0.77106	0.63338	0.43562	0.19768
599.448	-0.02387	0.28421	0.54594	0.72171	0.83333	0.8754	0.85437	0.77111	0.6336	0.43606	0.19837
599.648	-0.02387	0.2841	0.54576	0.7215	0.83311	0.87523	0.85428	0.77117	0.63381	0.4365	0.19905
599.848	-0.02388	0.284	0.54559	0.72129	0.8329	0.87507	0.8542	0.77122	0.63403	0.43694	0.19973
600.047	-0.02389	0.28389	0.54542	0.72108	0.83269	0.8749	0.85411	0.77127	0.63425	0.43738	0.20041
600.247	-0.0239	0.28379	0.54525	0.72087	0.83247	0.87474	0.85403	0.77133	0.63446	0.43782	0.20109
600.447	-0.02391	0.28369	0.54508	0.72066	0.83226	0.87457	0.85395	0.77139	0.63468	0.43826	0.20177
600.647	-0.02392	0.28358	0.54491	0.72046	0.83205	0.87441	0.85387	0.77144	0.6349	0.4387	0.20245
600.846	-0.02392	0.28348	0.54474	0.72025	0.83185	0.87425	0.85379	0.7715	0.63512	0.43914	0.20313
601.046	-0.02393	0.28338	0.54457	0.72004	0.83164	0.87409	0.85372	0.77156	0.63534	0.43958	0.2038
601.246	-0.02394	0.28328	0.54441	0.71984	0.83143	0.87393	0.85364	0.77162	0.63556	0.44002	0.20448
601.445	-0.02395	0.28318	0.54424	0.71964	0.83123	0.87377	0.85357	0.77169	0.63579	0.44046	0.20515
601.645	-0.02397	0.28307	0.54407	0.71943	0.83103	0.87362	0.8535	0.77175	0.63601	0.4409	0.20582
601.845	-0.02398	0.28297	0.5439	0.71923	0.83083	0.87346	0.85343	0.77182	0.63623	0.44134	0.20649
602.044	-0.02399	0.28287	0.54374	0.71903	0.83063	0.87331	0.85336	0.77189	0.63646	0.44178	0.20716
602.244	-0.024	0.28277	0.54357	0.71884	0.83044	0.87317	0.8533	0.77196	0.63669	0.44222	0.20783
602.444	-0.02401	0.28267	0.54341	0.71864	0.83025	0.87302	0.85324	0.77203	0.63692	0.44266	0.2085
602.643	-0.02403	0.28257	0.54325	0.71845	0.83006	0.87288	0.85318	0.77211	0.63715	0.4431	0.20916
602.843	-0.02404	0.28247	0.54308	0.71825	0.82987	0.87274	0.85312	0.77218	0.63738	0.44354	0.20983
603.042	-0.02406	0.28237	0.54292	0.71806	0.82968	0.8726	0.85307	0.77226	0.63761	0.44398	0.21049
603.242	-0.02407	0.28227	0.54276	0.71787	0.8295	0.87246	0.85302	0.77234	0.63784	0.44442	0.21115
603.441	-0.02409	0.28216	0.54259	0.71768	0.82932	0.87233	0.85297	0.77242	0.63808	0.44486	0.2118
603.641	-0.02411	0.28206	0.54243	0.7175	0.82914	0.8722	0.85292	0.77251	0.63831	0.4453	0.21246
603.84	-0.02413	0.28196	0.54227	0.71731	0.82897	0.87207	0.85288	0.77259	0.63855	0.44573	0.21311
604.04	-0.02415	0.28186	0.54211	0.71713	0.82879	0.87195	0.85284	0.77268	0.63879	0.44617	0.21376
604.239	-0.02417	0.28176	0.54195	0.71695	0.82862	0.87182	0.8528	0.77277	0.63903	0.44661	0.21441
604.438	-0.02419	0.28166	0.5418	0.71677	0.82846	0.87171	0.85277	0.77287	0.63927	0.44705	0.21506
604.638	-0.02422	0.28156	0.54164	0.7166	0.82829	0.87159	0.85274	0.77296	0.63951	0.44748	0.21571
604.837	-0.02424	0.28146	0.54148	0.71642	0.82813	0.87148	0.85271	0.77306	0.63976	0.44792	0.21636
605.037	-0.02427	0.28136	0.54133	0.71625	0.82798	0.87137	0.85269	0.77316	0.64	0.44836	0.217
605.236	-0.02429	0.28126	0.54118	0.71608	0.82782	0.87127	0.85267	0.77327	0.64025	0.4488	0.21764
605.435	-0.02432	0.28117	0.54102	0.71592	0.82767	0.87117	0.85265	0.77337	0.6405	0.44924	0.21829
605.635	-0.02434	0.28107	0.54088	0.71575	0.82753	0.87107	0.85264	0.77348	0.64076	0.44967	0.21893
605.834	-0.02437	0.28097	0.54073	0.71559	0.82738	0.87098	0.85263	0.77359	0.64101	0.45011	0.21957
606.033	-0.02439	0.28088	0.54058	0.71544	0.82724	0.87089	0.85263	0.77371	0.64127	0.45055	0.22021
606.232	-0.02442	0.28079	0.54044	0.71528	0.82711	0.8708	0.85263	0.77383	0.64153	0.451	0.22085
606.432	-0.02444	0.2807	0.5403	0.71513	0.82698	0.87072	0.85263	0.77395	0.64179	0.45144	0.22149
606.631	-0.02447	0.28061	0.54016	0.71499	0.82685	0.87064	0.85263	0.77407	0.64206	0.45188	0.22213
606.83	-0.02449	0.28052	0.54002	0.71484	0.82673	0.87057	0.85264	0.7742	0.64232	0.45233	0.22276
607.029	-0.02451	0.28043	0.53988	0.7147	0.82661	0.8705	0.85266	0.77433	0.64259	0.45277	0.2234
607.228	-0.02453	0.28035	0.53975	0.71457	0.82649	0.87043	0.85267	0.77446	0.64287	0.45322	0.22404
607.428	-0.02456	0.28026	0.53962	0.71443	0.82638	0.87037	0.85269	0.7746	0.64314	0.45367	0.22468
607.627	-0.02458	0.28018	0.53949	0.7143	0.82627	0.87031	0.85272	0.77474	0.64342	0.45412	0.22532
607.826	-0.0246	0.2801	0.53937	0.71418	0.82617	0.87025	0.85275	0.77488	0.6437	0.45457	0.22595
608.025	-0.02461	0.28003	0.53925	0.71405	0.82607	0.8702	0.85278	0.77503	0.64398	0.45502	0.22659
608.224	-0.02463	0.27995	0.53913	0.71393	0.82597	0.87015	0.85281	0.77518	0.64427	0.45548	0.22723
608.423	-0.02465	0.27988	0.53901	0.71381	0.82588	0.87011	0.85285	0.77533	0.64456	0.45593	0.22787
608.622	-0.02467	0.2798	0.53889	0.7137	0.82579	0.87007	0.85289	0.77548	0.64485	0.45639	0.2285
608.821	-0.02468	0.27973	0.53878	0.71359	0.82571	0.87003	0.85294	0.77564	0.64514	0.45684	0.22914
609.02	-0.0247	0.27966	0.53867	0.71348	0.82563	0.86999	0.85298	0.7758	0.64543	0.4573	0.22977
609.219	-0.02472	0.2796	0.53856	0.71337	0.82555	0.86996	0.85303	0.77596	0.64573	0.45776	0.23041
609.418	-0.02473	0.27953	0.53846	0.71327	0.82547	0.86993	0.85309	0.77613	0.64603	0.45822	0.23104
609.617	-0.02474	0.27947	0.53835	0.71317	0.8254	0.8699	0.85314	0.7763	0.64633	0.45868	0.23168
609.816	-0.02476	0.2794	0.53825	0.71308	0.82533	0.86988	0.8532	0.77647	0.64663	0.45914	0.23231
610.015	-0.02477	0.27934	0.53816	0.71299	0.82526	0.86986	0.85327	0.77664	0.64694	0.4596	0.23294
610.214	-0.02478	0.27929	0.53806	0.7129	0.8252	0.86985	0.85333	0.77682	0.64724	0.46006	0.23358
610.413	-0.02479	0.27923	0.53797	0.71281	0.82514	0.86984	0.8534	0.777	0.64755	0.46053	0.23421
610.612	-0.0248	0.27918	0.53788	0.71273	0.82509	0.86983	0.85348	0.77718	0.64787	0.46099	0.23484
610.811	-0.02481	0.27912	0.5378	0.71266	0.82504	0.86983	0.85356	0.77736	0.64818	0.46146	0.23547
611.01	-0.02482	0.27907	0.53771	0.71258	0.82499	0.86983	0.85364	0.77755	0.6485	0.46193	0.23611
611.209	-0.02483	0.27903	0.53763	0.71251	0.82495	0.86983	0.85372	0.77774	0.64882	0.4624	0.23674
611.407	-0.02484	0.27898	0.53756	0.71244	0.82491	0.86984	0.85381	0.77794	0.64914	0.46287	0.23737
611.606	-0.02484	0.27894	0.53748	0.71238	0.82488	0.86985	0.8539	0.77813	0.64946	0.46334	0.238
611.805	-0.02485	0.2789	0.53741	0.71232	0.82485	0.86986	0.854	0.77834	0.64979	0.46381	0.23863
612.004	-0.02486	0.27886	0.53734	0.71227	0.82482	0.86988	0.85409	0.77854	0.65011	0.46428	0.23926
612.202	-0.02486	0.27882	0.53728	0.71221	0.8248	0.86991	0.8542	0.77875	0.65044	0.46476	0.23988
612.401	-0.02487	0.27878	0.53722	0.71216	0.82478	0.86993	0.8543	0.77896	0.65078	0.46523	0.24051
612.6	-0.02488	0.27874	0.53716	0.71212	0.82476	0.86997	0.85442	0.77917	0.65111	0.46571	0.24114
612.799	-0.02488	0.27871	0.5371	0.71208	0.82475	0.87	0.85453	0.77939	0.65145	0.46618	0.24176
612.997	-0.02489	0.27868	0.53705	0.71204	0.82474	0.87004	0.85465	0.77961	0.65178	0.46666	0.24238
613.196	-0.02489	0.27865	0.537	0.71201	0.82474	0.87009	0.85477	0.77983	0.65213	0.46714	0.24301
613.395	-0.0249	0.27862	0.53695	0.71198	0.82474	0.87014	0.8549	0.78006	0.65247	0.46762	0.24363
613.593	-0.02491	0.27859	0.53691	0.71195	0.82475	0.8702	0.85504	0.78029	0.65281	0.4681	0.24425
613.792	-0.02492	0.27857	0.53687	0.71193	0.82476	0.87026	0.85518	0.78052	0.65316	0.46858	0.24486
613.991	-0.02492	0.27854	0.53684	0.71191	0.82478	0.87032	0.85532	0.78076	0.65351	0.46906	0.24548
614.189	-0.02493	0.27852	0.5368	0.7119	0.8248	0.87039	0.85547	0.781	0.65386	0.46954	0.2461
614.388	-0.02494	0.2785	0.53677	0.71189	0.82483	0.87047	0.85562	0.78125	0.65422	0.47002	0.24671
614.586	-0.02495	0.27848	0.53675	0.71189	0.82487	0.87056	0.85578	0.7815	0.65458	0.47051	0.24732
614.785	-0.02496	0.27846	0.53673	0.71189	0.82491	0.87065	0.85595	0.78175	0.65494	0.47099	0.24793
614.983	-0.02497	0.27844	0.53671	0.7119	0.82495	0.87074	0.85612	0.78201	0.65531	0.47147	0.24855
615.182	-0.02498	0.27842	0.53669	0.71191	0.825	0.87084	0.8563	0.78227	0.65568	0.47196	0.24915
615.38	-0.02499	0.27841	0.53668	0.71192	0.82506	0.87095	0.85648	0.78254	0.65605	0.47245	0.24976
615.579	-0.025	0.2784	0.53667	0.71194	0.82513	0.87107	0.85667	0.78281	0.65642	0.47294	0.25037
615.777	-0.02501	0.27839	0.53667	0.71196	0.8252	0.87119	0.85687	0.78309	0.6568	0.47343	0.25097
615.976	-0.02502	0.27838	0.53667	0.71199	0.82527	0.87131	0.85707	0.78337	0.65718	0.47392	0.25158
616.174	-0.02503	0.27837	0.53667	0.71202	0.82535	0.87145	0.85728	0.78366	0.65756	0.47441	0.25218
616.373	-0.02504	0.27837	0.53668	0.71206	0.82544	0.87158	0.85749	0.78394	0.65795	0.4749	0.25278
616.571	-0.02505	0.27836	0.53669	0.7121	0.82553	0.87173	0.85771	0.78424	0.65833	0.47539	0.25338
616.769	-0.02507	0.27836	0.5367	0.71214	0.82562	0.87188	0.85793	0.78453	0.65872	0.47588	0.25398
616.968	-0.02508	0.27836	0.53671	0.71219	0.82572	0.87203	0.85815	0.78483	0.65911	0.47637	0.25457
617.166	-0.02509	0.27835	0.53673	0.71224	0.82583	0.87219	0.85838	0.78513	0.6595	0.47686	0.25517
617.364	-0.02511	0.27835	0.53675	0.71229	0.82593	0.87235	0.85862	0.78544	0.6599	0.47735	0.25576
617.563	-0.02512	0.27836	0.53677	0.71235	0.82605	0.87252	0.85886	0.78575	0.6603	0.47784	0.25635
617.761	-0.02514	0.27836	0.5368	0.71241	0.82617	0.87269	0.8591	0.78606	0.6607	0.47833	0.25694
617.959	-0.02515	0.27836	0.53682	0.71248	0.82629	0.87287	0.85935	0.78637	0.6611	0.47882	0.25753
618.157	-0.02517	0.27837	0.53686	0.71255	0.82642	0.87305	0.8596	0.78669	0.6615	0.47932	0.25812
618.356	-0.02518	0.27838	0.53689	0.71262	0.82655	0.87324	0.85986	0.78702	0.6619	0.47981	0.2587
618.554	-0.0252	0.27838	0.53693	0.7127	0.82669	0.87343	0.86012	0.78734	0.66231	0.4803	0.25928
618.752	-0.02521	0.27839	0.53697	0.71278	0.82683	0.87362	0.86039	0.78767	0.66272	0.48079	0.25987
618.95	-0.02523	0.27841	0.53701	0.71286	0.82697	0.87383	0.86066	0.78801	0.66313	0.48128	0.26045
619.148	-0.02524	0.27842	0.53706	0.71295	0.82712	0.87403	0.86093	0.78834	0.66354	0.48178	0.26102
619.347	-0.02526	0.27844	0.5371	0.71305	0.82728	0.87424	0.86121	0.78869	0.66396	0.48227	0.2616
619.545	-0.02527	0.27845	0.53716	0.71314	0.82744	0.87445	0.86149	0.78903	0.66437	0.48276	0.26218
619.743	-0.02529	0.27847	0.53721	0.71324	0.8276	0.87467	0.86178	0.78937	0.66479	0.48325	0.26275
619.941	-0.0253	0.27849	0.53726	0.71335	0.82776	0.87489	0.86206	0.78972	0.66521	0.48375	0.26332
620.139	-0.02531	0.27851	0.53732	0.71346	0.82793	0.87512	0.86235	0.79008	0.66563	0.48424	0.26389
620.337	-0.02533	0.27854	0.53738	0.71357	0.8281	0.87534	0.86265	0.79043	0.66605	0.48473	0.26446
620.535	-0.02534	0.27856	0.53745	0.71368	0.82828	0.87558	0.86295	0.79079	0.66648	0.48522	0.26503
620.733	-0.02535	0.27859	0.53751	0.7138	0.82846	0.87581	0.86325	0.79115	0.6669	0.48572	0.26559
620.931	-0.02537	0.27861	0.53758	0.71392	0.82864	0.87605	0.86355	0.79151	0.66733	0.48621	0.26616
621.129	-0.02538	0.27864	0.53765	0.71405	0.82883	0.87629	0.86386	0.79187	0.66775	0.4867	0.26672
621.327	-0.02539	0.27867	0.53773	0.71417	0.82901	0.87653	0.86416	0.79224	0.66818	0.48719	0.26728
621.525	-0.0254	0.2787	0.5378	0.71431	0.8292	0.87678	0.86448	0.79261	0.66861	0.48769	0.26784
621.723	-0.02542	0.27874	0.53788	0.71444	0.8294	0.87703	0.86479	0.79298	0.66904	0.48818	0.26839
621.921	-0.02543	0.27877	0.53796	0.71458	0.8296	0.87728	0.86511	0.79336	0.66947	0.48867	0.26895
622.119	-0.02544	0.27881	0.53805	0.71472	0.8298	0.87754	0.86542	0.79373	0.66991	0.48917	0.2695
622.317	-0.02545	0.27884	0.53813	0.71487	0.83	0.8778	0.86575	0.79411	0.67034	0.48966	0.27006
622.515	-0.02546	0.27888	0.53822	0.71501	0.83021	0.87806	0.86607	0.79449	0.67078	0.49015	0.27061
622.713	-0.02546	0.27892	0.53831	0.71517	0.83042	0.87832	0.8664	0.79488	0.67122	0.49065	0.27116
622.91	-0.02547	0.27897	0.53841	0.71532	0.83063	0.87859	0.86673	0.79526	0.67166	0.49115	0.27171
623.108	-0.02548	0.27901	0.5385	0.71548	0.83085	0.87886	0.86706	0.79565	0.6721	0.49164	0.27225
623.306	-0.02549	0.27906	0.5386	0.71564	0.83107	0.87914	0.86739	0.79604	0.67254	0.49214	0.2728
623.504	-0.02549	0.2791	0.53871	0.71581	0.8313	0.87942	0.86773	0.79644	0.67299	0.49264	0.27335
623.702	-0.02549	0.27915	0.53881	0.71598	0.83153	0.8797	0.86808	0.79684	0.67344	0.49314	0.27389
623.899	-0.0255	0.27921	0.53892	0.71616	0.83176	0.87999	0.86843	0.79724	0.67389	0.49364	0.27444
624.097	-0.0255	0.27926	0.53904	0.71634	0.832	0.88028	0.86878	0.79764	0.67434	0.49414	0.27498
624.295	-0.0255	0.27932	0.53915	0.71652	0.83224	0.88058	0.86913	0.79805	0.67479	0.49464	0.27553
624.493	-0.0255	0.27938	0.53927	0.71671	0.83249	0.88088	0.86949	0.79846	0.67525	0.49515	0.27607
624.69	-0.0255	0.27944	0.53939	0.7169	0.83274	0.88118	0.86985	0.79887	0.67571	0.49565	0.27661
624.888	-0.0255	0.2795	0.53952	0.71709	0.83299	0.88149	0.87021	0.79929	0.67617	0.49616	0.27715
625.086	-0.0255	0.27956	0.53965	0.71729	0.83324	0.8818	0.87058	0.79971	0.67663	0.49667	0.27769
625.283	-0.0255	0.27963	0.53978	0.71749	0.8335	0.88211	0.87095	0.80013	0.67709	0.49717	0.27823
625.481	-0.02549	0.27969	0.53991	0.7177	0.83377	0.88243	0.87132	0.80055	0.67756	0.49768	0.27877
625.679	-0.02549	0.27976	0.54005	0.7179	0.83403	0.88275	0.87169	0.80098	0.67803	0.49819	0.2793
625.876	-0.02549	0.27983	0.54018	0.71811	0.8343	0.88308	0.87207	0.80141	0.6785	0.4987	0.27984
626.074	-0.02548	0.2799	0.54033	0.71833	0.83458	0.88341	0.87245	0.80184	0.67897	0.49921	0.28037
626.271	-0.02548	0.27998	0.54047	0.71855	0.83485	0.88375	0.87284	0.80227	0.67944	0.49972	0.2809
626.469	-0.02548	0.28005	0.54062	0.71877	0.83514	0.88409	0.87323	0.80271	0.67992	0.50023	0.28144
626.666	-0.02547	0.28013	0.54077	0.71899	0.83542	0.88443	0.87362	0.80315	0.68039	0.50074	0.28197
626.864	-0.02547	0.2802	0.54092	0.71922	0.83571	0.88477	0.87402	0.80359	0.68087	0.50126	0.2825
627.061	-0.02546	0.28028	0.54107	0.71945	0.836	0.88512	0.87441	0.80403	0.68135	0.50177	0.28302
627.259	-0.02546	0.28036	0.54123	0.71968	0.83629	0.88548	0.87482	0.80448	0.68183	0.50228	0.28355
627.456	-0.02546	0.28044	0.54139	0.71991	0.83659	0.88584	0.87522	0.80493	0.68232	0.50279	0.28408
627.654	-0.02545	0.28052	0.54155	0.72015	0.83689	0.8862	0.87563	0.80538	0.6828	0.50331	0.2846
627.851	-0.02545	0.2806	0.54171	0.72039	0.83719	0.88656	0.87604	0.80583	0.68329	0.50382	0.28512
628.049	-0.02545	0.28069	0.54188	0.72063	0.8375	0.88693	0.87645	0.80629	0.68377	0.50433	0.28564
628.246	-0.02545	0.28077	0.54204	0.72088	0.83781	0.8873	0.87687	0.80675	0.68426	0.50485	0.28616
628.443	-0.02545	0.28086	0.54221	0.72113	0.83812	0.88767	0.87729	0.8072	0.68475	0.50536	0.28668
628.641	-0.02544	0.28094	0.54238	0.72138	0.83844	0.88805	0.87771	0.80767	0.68524	0.50587	0.28719
628.838	-0.02544	0.28103	0.54256	0.72163	0.83875	0.88843	0.87814	0.80813	0.68573	0.50639	0.28771
629.036	-0.02544	0.28112	0.54273	0.72189	0.83908	0.88882	0.87857	0.8086	0.68623	0.5069	0.28822
629.233	-0.02544	0.28121	0.54291	0.72214	0.8394	0.88921	0.879	0.80906	0.68672	0.50742	0.28873
629.43	-0.02544	0.28129	0.54309	0.72241	0.83973	0.8896	0.87944	0.80953	0.68722	0.50793	0.28924
629.627	-0.02545	0.28139	0.54327	0.72267	0.84006	0.89	0.87988	0.81001	0.68772	0.50845	0.28975
629.825	-0.02545	0.28148	0.54346	0.72294	0.8404	0.8904	0.88033	0.81048	0.68822	0.50896	0.29026
630.022	-0.02545	0.28157	0.54364	0.7232	0.84074	0.8908	0.88077	0.81096	0.68872	0.50948	0.29077
630.219	-0.02545	0.28166	0.54383	0.72348	0.84108	0.89121	0.88123	0.81144	0.68923	0.51	0.29127
630.416	-0.02545	0.28176	0.54403	0.72375	0.84143	0.89162	0.88168	0.81193	0.68974	0.51051	0.29178
630.614	-0.02545	0.28186	0.54422	0.72403	0.84178	0.89203	0.88214	0.81242	0.69024	0.51103	0.29228
630.811	-0.02545	0.28195	0.54442	0.72431	0.84214	0.89245	0.88261	0.81291	0.69076	0.51155	0.29279
631.008	-0.02545	0.28205	0.54462	0.7246	0.8425	0.89288	0.88308	0.81341	0.69127	0.51207	0.29329
631.205	-0.02545	0.28215	0.54483	0.72489	0.84287	0.89331	0.88355	0.81391	0.69179	0.51259	0.29379
631.402	-0.02545	0.28226	0.54503	0.72518	0.84324	0.89374	0.88403	0.81441	0.69231	0.51312	0.2943
631.599	-0.02545	0.28236	0.54524	0.72548	0.84362	0.89418	0.88451	0.81492	0.69283	0.51364	0.2948
631.796	-0.02545	0.28246	0.54545	0.72578	0.84399	0.89462	0.88499	0.81543	0.69335	0.51416	0.2953
631.993	-0.02545	0.28257	0.54567	0.72608	0.84438	0.89507	0.88548	0.81594	0.69387	0.51469	0.2958
632.19	-0.02545	0.28268	0.54588	0.72638	0.84477	0.89552	0.88598	0.81646	0.6944	0.51521	0.2963
632.388	-0.02545	0.28279	0.5461	0.72669	0.84516	0.89597	0.88648	0.81698	0.69493	0.51574	0.2968
632.585	-0.02545	0.2829	0.54632	0.72701	0.84556	0.89643	0.88698	0.8175	0.69546	0.51627	0.2973
632.782	-0.02544	0.28301	0.54655	0.72732	0.84595	0.89689	0.88748	0.81802	0.696	0.5168	0.2978
632.979	-0.02544	0.28312	0.54678	0.72764	0.84636	0.89735	0.88799	0.81855	0.69653	0.51732	0.2983
633.176	-0.02544	0.28324	0.547	0.72796	0.84676	0.89782	0.8885	0.81908	0.69707	0.51785	0.2988
633.372	-0.02544	0.28335	0.54723	0.72828	0.84717	0.89829	0.88901	0.81962	0.69761	0.51838	0.29929
633.569	-0.02543	0.28347	0.54747	0.7286	0.84758	0.89876	0.88953	0.82015	0.69814	0.51891	0.29979
633.766	-0.02543	0.28358	0.5477	0.72893	0.84799	0.89924	0.89004	0.82069	0.69868	0.51943	0.30029
633.963	-0.02542	0.2837	0.54794	0.72926	0.84841	0.89971	0.89056	0.82123	0.69922	0.51996	0.30078
634.16	-0.02542	0.28382	0.54818	0.72959	0.84883	0.90019	0.89108	0.82177	0.69976	0.52049	0.30127
634.357	-0.02542	0.28394	0.54841	0.72992	0.84924	0.90067	0.8916	0.82231	0.70031	0.52102	0.30177
634.554	-0.02541	0.28406	0.54866	0.73025	0.84966	0.90115	0.89212	0.82285	0.70085	0.52154	0.30226
634.751	-0.0254	0.28418	0.5489	0.73058	0.85008	0.90163	0.89265	0.82339	0.70139	0.52207	0.30275
634.948	-0.02539	0.28431	0.54914	0.73092	0.85051	0.90212	0.89317	0.82394	0.70194	0.5226	0.30325
635.144	-0.02539	0.28443	0.54939	0.73126	0.85093	0.9026	0.8937	0.82449	0.70248	0.52312	0.30374
635.341	-0.02538	0.28456	0.54964	0.7316	0.85135	0.90309	0.89422	0.82503	0.70303	0.52365	0.30423
635.538	-0.02536	0.28469	0.54989	0.73194	0.85178	0.90357	0.89475	0.82558	0.70357	0.52418	0.30472
635.735	-0.02535	0.28482	0.55014	0.73228	0.85221	0.90406	0.89528	0.82613	0.70412	0.5247	0.30521
635.931	-0.02534	0.28495	0.55039	0.73263	0.85263	0.90455	0.89581	0.82668	0.70466	0.52523	0.3057
636.128	-0.02533	0.28508	0.55065	0.73297	0.85306	0.90504	0.89634	0.82723	0.70521	0.52575	0.30619
636.325	-0.02531	0.28522	0.5509	0.73332	0.85349	0.90553	0.89687	0.82778	0.70576	0.52628	0.30668
636.522	-0.02529	0.28535	0.55116	0.73367	0.85393	0.90602	0.8974	0.82833	0.70631	0.52681	0.30717
636.718	-0.02528	0.28549	0.55142	0.73402	0.85436	0.90652	0.89793	0.82888	0.70686	0.52733	0.30766
636.915	-0.02526	0.28563	0.55168	0.73437	0.85479	0.90701	0.89847	0.82944	0.70741	0.52786	0.30815
637.112	-0.02524	0.28577	0.55195	0.73472	0.85523	0.90751	0.899	0.82999	0.70796	0.52839	0.30864
637.308	-0.02521	0.28591	0.55221	0.73508	0.85567	0.90801	0.89954	0.83055	0.70851	0.52891	0.30913
637.505	-0.02519	0.28606	0.55248	0.73544	0.8561	0.90851	0.90007	0.8311	0.70907	0.52944	0.30962
637.701	-0.02517	0.2862	0.55274	0.73579	0.85654	0.90901	0.90061	0.83166	0.70962	0.52997	0.31011
637.898	-0.02514	0.28635	0.55301	0.73615	0.85698	0.90951	0.90115	0.83222	0.71017	0.5305	0.3106
638.094	-0.02512	0.2865	0.55328	0.73651	0.85742	0.91001	0.90169	0.83278	0.71073	0.53102	0.31109
638.291	-0.02509	0.28665	0.55355	0.73688	0.85787	0.91052	0.90223	0.83334	0.71128	0.53155	0.31158
638.488	-0.02506	0.2868	0.55383	0.73724	0.85831	0.91102	0.90278	0.8339	0.71184	0.53208	0.31207
638.684	-0.02503	0.28695	0.5541	0.73761	0.85876	0.91153	0.90332	0.83446	0.7124	0.53261	0.31256
638.881	-0.025	0.2871	0.55438	0.73798	0.85921	0.91204	0.90387	0.83502	0.71296	0.53314	0.31305
639.077	-0.02496	0.28726	0.55465	0.73835	0.85966	0.91255	0.90442	0.83559	0.71352	0.53367	0.31354
639.273	-0.02493	0.28741	0.55493	0.73872	0.86011	0.91307	0.90497	0.83615	0.71408	0.5342	0.31404
639.47	-0.0249	0.28757	0.55521	0.73909	0.86056	0.91358	0.90552	0.83672	0.71464	0.53473	0.31453
639.666	-0.02486	0.28773	0.55549	0.73946	0.86101	0.9141	0.90607	0.83728	0.7152	0.53526	0.31502
639.863	-0.02482	0.28789	0.55577	0.73983	0.86146	0.91461	0.90662	0.83785	0.71576	0.53579	0.31551
640.059	-0.02478	0.28805	0.55606	0.7402	0.86192	0.91513	0.90717	0.83841	0.71632	0.53633	0.316
640.255	-0.02474	0.28822	0.55634	0.74058	0.86237	0.91564	0.90772	0.83898	0.71688	0.53686	0.31649
640.452	-0.0247	0.28838	0.55662	0.74095	0.86282	0.91616	0.90828	0.83955	0.71744	0.53739	0.31698
640.648	-0.02466	0.28855	0.55691	0.74133	0.86327	0.91667	0.90883	0.84011	0.718	0.53792	0.31747
640.845	-0.02462	0.28872	0.55719	0.7417	0.86373	0.91719	0.90938	0.84068	0.71856	0.53845	0.31796
641.041	-0.02457	0.28888	0.55748	0.74208	0.86418	0.91771	0.90994	0.84124	0.71912	0.53898	0.31846
641.237	-0.02453	0.28905	0.55777	0.74246	0.86463	0.91823	0.91049	0.84181	0.71968	0.53951	0.31895
641.433	-0.02448	0.28923	0.55806	0.74284	0.86509	0.91875	0.91104	0.84237	0.72024	0.54004	0.31944
641.63	-0.02443	0.2894	0.55834	0.74321	0.86554	0.91927	0.9116	0.84294	0.7208	0.54057	0.31993
641.826	-0.02439	0.28957	0.55863	0.74359	0.866	0.91979	0.91215	0.8435	0.72136	0.5411	0.32042
642.022	-0.02434	0.28974	0.55892	0.74397	0.86645	0.92031	0.91271	0.84407	0.72192	0.54163	0.32091
642.218	-0.02429	0.28992	0.55921	0.74435	0.8669	0.92082	0.91326	0.84463	0.72247	0.54216	0.3214
642.414	-0.02424	0.29009	0.5595	0.74473	0.86735	0.92134	0.91381	0.84519	0.72303	0.54269	0.32189
642.611	-0.0242	0.29026	0.55978	0.7451	0.86781	0.92186	0.91436	0.84575	0.72359	0.54322	0.32237
642.807	-0.02415	0.29044	0.56007	0.74548	0.86826	0.92237	0.91491	0.84631	0.72414	0.54374	0.32286
643.003	-0.0241	0.29061	0.56035	0.74586	0.8687	0.92289	0.91546	0.84687	0.72469	0.54427	0.32334
643.199	-0.02406	0.29078	0.56064	0.74623	0.86915	0.9234	0.916	0.84743	0.72524	0.54479	0.32382
643.395	-0.02401	0.29095	0.56092	0.7466	0.86959	0.92391	0.91654	0.84798	0.72579	0.54531	0.3243
643.591	-0.02397	0.29112	0.5612	0.74697	0.87004	0.92442	0.91708	0.84853	0.72634	0.54583	0.32478
643.787	-0.02393	0.29129	0.56148	0.74734	0.87048	0.92492	0.91762	0.84908	0.72688	0.54634	0.32526
643.983	-0.02389	0.29146	0.56176	0.74771	0.87092	0.92543	0.91816	0.84963	0.72742	0.54686	0.32573
644.179	-0.02386	0.29162	0.56203	0.74808	0.87136	0.92593	0.91869	0.85017	0.72796	0.54737	0.3262
644.375	-0.02382	0.29178	0.5623	0.74844	0.8718	0.92643	0.91922	0.85071	0.7285	0.54788	0.32667
644.571	-0.02379	0.29195	0.56258	0.74881	0.87223	0.92693	0.91976	0.85126	0.72904	0.54839	0.32713
644.767	-0.02375	0.29211	0.56285	0.74917	0.87266	0.92743	0.92028	0.85179	0.72957	0.54889	0.3276
644.963	-0.02372	0.29226	0.56311	0.74953	0.8731	0.92792	0.92081	0.85233	0.7301	0.5494	0.32806
645.159	-0.0237	0.29242	0.56338	0.74989	0.87352	0.92841	0.92133	0.85287	0.73063	0.5499	0.32852
645.355	-0.02367	0.29257	0.56364	0.75024	0.87395	0.9289	0.92185	0.8534	0.73115	0.5504	0.32897
645.551	-0.02365	0.29273	0.5639	0.7506	0.87437	0.92939	0.92237	0.85392	0.73167	0.55089	0.32942
645.747	-0.02362	0.29287	0.56416	0.75095	0.87479	0.92987	0.92288	0.85445	0.73219	0.55138	0.32987
645.943	-0.0236	0.29302	0.56441	0.75129	0.87521	0.93035	0.92339	0.85497	0.73271	0.55187	0.33032
646.139	-0.02359	0.29317	0.56466	0.75164	0.87563	0.93082	0.92389	0.85549	0.73322	0.55236	0.33076
646.335	-0.02357	0.29331	0.56492	0.75198	0.87604	0.93129	0.9244	0.85601	0.73373	0.55285	0.3312
646.53	-0.02356	0.29345	0.56516	0.75232	0.87645	0.93176	0.9249	0.85652	0.73424	0.55333	0.33164
646.726	-0.02354	0.29359	0.56541	0.75266	0.87686	0.93223	0.9254	0.85703	0.73474	0.55381	0.33208
646.922	-0.02353	0.29372	0.56565	0.75299	0.87727	0.93269	0.92589	0.85754	0.73524	0.55429	0.33251
647.118	-0.02352	0.29386	0.5659	0.75333	0.87767	0.93315	0.92638	0.85805	0.73574	0.55476	0.33295
647.314	-0.02352	0.29399	0.56614	0.75366	0.87807	0.9336	0.92687	0.85855	0.73624	0.55524	0.33338
647.509	-0.02351	0.29412	0.56638	0.75399	0.87847	0.93406	0.92735	0.85905	0.73674	0.55571	0.3338
647.705	-0.02351	0.29425	0.56661	0.75432	0.87887	0.93451	0.92784	0.85955	0.73723	0.55618	0.33423
647.901	-0.0235	0.29438	0.56685	0.75464	0.87927	0.93496	0.92832	0.86005	0.73772	0.55665	0.33466
648.097	-0.0235	0.2945	0.56708	0.75496	0.87966	0.9354	0.92879	0.86054	0.73821	0.55711	0.33508
648.292	-0.0235	0.29463	0.56732	0.75528	0.88006	0.93585	0.92927	0.86104	0.7387	0.55758	0.3355
648.488	-0.0235	0.29475	0.56755	0.7556	0.88045	0.93629	0.92974	0.86153	0.73918	0.55804	0.33592
648.684	-0.0235	0.29487	0.56778	0.75592	0.88084	0.93673	0.93021	0.86201	0.73967	0.5585	0.33634
648.879	-0.0235	0.29499	0.56801	0.75623	0.88122	0.93716	0.93067	0.8625	0.74015	0.55896	0.33675
649.075	-0.0235	0.29511	0.56823	0.75654	0.88161	0.9376	0.93113	0.86298	0.74063	0.55942	0.33717
649.27	-0.0235	0.29522	0.56846	0.75685	0.88199	0.93803	0.93159	0.86346	0.7411	0.55987	0.33759
649.466	-0.0235	0.29534	0.56868	0.75716	0.88237	0.93845	0.93205	0.86394	0.74158	0.56033	0.338
649.662	-0.02351	0.29545	0.56891	0.75746	0.88275	0.93888	0.9325	0.86442	0.74205	0.56078	0.33841
649.857	-0.02351	0.29557	0.56913	0.75777	0.88312	0.9393	0.93295	0.86489	0.74253	0.56123	0.33882
650.053	-0.02351	0.29568	0.56935	0.75807	0.88349	0.93972	0.9334	0.86536	0.743	0.56168	0.33924
650.248	-0.02352	0.29579	0.56957	0.75836	0.88386	0.94014	0.93384	0.86583	0.74346	0.56213	0.33965
650.444	-0.02352	0.2959	0.56978	0.75866	0.88423	0.94055	0.93428	0.86629	0.74393	0.56258	0.34006
650.639	-0.02353	0.296	0.57	0.75895	0.88459	0.94096	0.93472	0.86675	0.74439	0.56302	0.34046
650.835	-0.02353	0.29611	0.57021	0.75924	0.88495	0.94137	0.93515	0.86721	0.74485	0.56347	0.34087
651.03	-0.02354	0.29621	0.57042	0.75952	0.88531	0.94177	0.93558	0.86766	0.74531	0.56391	0.34128
651.225	-0.02354	0.29632	0.57063	0.7598	0.88566	0.94217	0.93601	0.86811	0.74576	0.56435	0.34168
651.421	-0.02355	0.29642	0.57084	0.76008	0.88601	0.94257	0.93643	0.86856	0.74622	0.56479	0.34209
651.616	-0.02356	0.29652	0.57104	0.76036	0.88635	0.94295	0.93684	0.869	0.74666	0.56522	0.34249
651.812	-0.02356	0.29662	0.57124	0.76063	0.88669	0.94334	0.93725	0.86944	0.74711	0.56566	0.34289
652.007	-0.02357	0.29671	0.57144	0.7609	0.88703	0.94372	0.93766	0.86987	0.74755	0.56609	0.34329
652.202	-0.02358	0.29681	0.57164	0.76117	0.88736	0.9441	0.93806	0.87031	0.74799	0.56652	0.34369
652.398	-0.02358	0.29691	0.57184	0.76143	0.88768	0.94447	0.93846	0.87073	0.74842	0.56695	0.34409
652.593	-0.02359	0.297	0.57204	0.7617	0.88801	0.94484	0.93885	0.87116	0.74885	0.56738	0.3445
652.788	-0.0236	0.2971	0.57223	0.76196	0.88833	0.94521	0.93925	0.87159	0.74928	0.5678	0.3449
652.984	-0.0236	0.29719	0.57242	0.76222	0.88864	0.94557	0.93963	0.87201	0.74971	0.56823	0.3453
653.179	-0.0236	0.29729	0.57261	0.76247	0.88896	0.94593	0.94002	0.87243	0.75014	0.56866	0.3457
653.374	-0.02361	0.29738	0.5728	0.76273	0.88927	0.94629	0.9404	0.87284	0.75056	0.56908	0.3461
653.569	-0.02361	0.29747	0.57299	0.76298	0.88957	0.94664	0.94078	0.87326	0.75098	0.5695	0.3465
653.764	-0.02361	0.29757	0.57318	0.76324	0.88988	0.94699	0.94116	0.87367	0.7514	0.56993	0.34691
653.96	-0.02361	0.29766	0.57337	0.76349	0.89018	0.94735	0.94154	0.87408	0.75182	0.57035	0.34731
654.155	-0.02361	0.29775	0.57355	0.76374	0.89049	0.94769	0.94192	0.87449	0.75224	0.57077	0.34772
654.35	-0.02361	0.29785	0.57374	0.76399	0.89079	0.94804	0.94229	0.8749	0.75265	0.5712	0.34812
654.545	-0.02361	0.29794	0.57392	0.76423	0.89108	0.94839	0.94266	0.87531	0.75307	0.57162	0.34852
654.74	-0.02361	0.29803	0.57411	0.76448	0.89138	0.94873	0.94304	0.87572	0.75348	0.57204	0.34893
654.935	-0.02361	0.29812	0.57429	0.76473	0.89167	0.94908	0.94341	0.87613	0.75389	0.57246	0.34934
655.13	-0.02361	0.29821	0.57447	0.76497	0.89197	0.94942	0.94378	0.87653	0.7543	0.57288	0.34974
655.326	-0.02361	0.2983	0.57465	0.76522	0.89226	0.94976	0.94414	0.87694	0.75471	0.5733	0.35015
655.521	-0.02361	0.29839	0.57483	0.76546	0.89255	0.9501	0.94451	0.87734	0.75512	0.57373	0.35056
655.716	-0.0236	0.29849	0.57501	0.76571	0.89284	0.95044	0.94488	0.87774	0.75553	0.57415	0.35097
655.911	-0.0236	0.29858	0.57519	0.76595	0.89313	0.95078	0.94524	0.87815	0.75593	0.57457	0.35138
656.106	-0.0236	0.29867	0.57537	0.76619	0.89342	0.95111	0.94561	0.87855	0.75634	0.57499	0.35179
656.301	-0.02359	0.29876	0.57554	0.76643	0.8937	0.95145	0.94597	0.87895	0.75674	0.57541	0.3522
656.496	-0.02359	0.29885	0.57572	0.76667	0.89399	0.95178	0.94633	0.87934	0.75714	0.57583	0.35261
656.691	-0.02358	0.29894	0.5759	0.76691	0.89427	0.95212	0.9467	0.87974	0.75755	0.57625	0.35303
656.886	-0.02358	0.29903	0.57607	0.76715	0.89456	0.95245	0.94706	0.88014	0.75795	0.57667	0.35344
657.08	-0.02357	0.29912	0.57625	0.76739	0.89484	0.95278	0.94742	0.88054	0.75835	0.57709	0.35386
657.275	-0.02356	0.29921	0.57642	0.76763	0.89512	0.95311	0.94778	0.88094	0.75875	0.57751	0.35427
657.47	-0.02356	0.29931	0.5766	0.76787	0.89541	0.95344	0.94814	0.88133	0.75915	0.57794	0.35469
657.665	-0.02355	0.2994	0.57677	0.7681	0.89569	0.95377	0.9485	0.88173	0.75955	0.57836	0.35511
657.86	-0.02354	0.29949	0.57694	0.76834	0.89597	0.9541	0.94886	0.88212	0.75995	0.57878	0.35553
658.055	-0.02353	0.29958	0.57712	0.76858	0.89625	0.95443	0.94922	0.88252	0.76035	0.5792	0.35595
658.25	-0.02352	0.29967	0.57729	0.76881	0.89653	0.95476	0.94958	0.88291	0.76076	0.57963	0.35637
658.444	-0.02351	0.29977	0.57746	0.76905	0.89681	0.95509	0.94994	0.88331	0.76116	0.58005	0.3568
658.639	-0.0235	0.29986	0.57763	0.76928	0.89709	0.95542	0.9503	0.8837	0.76156	0.58047	0.35722
[truncated: 1,314 more rows]

## Sheet: Figure 6
SOC	OCV / V
0.00121	1.18841
0.00157	1.1879
[truncated: 6,972 more rows]
